# Supplementary material for: Fibro-adipogenic progenitors of dystrophic mice are insensitive to NOTCH regulation of adipogenesis
Source: Life Sci Alliance. 2019 Jun 25;2(3):e201900437. doi: 10.26508/lsa.201900437 (PMC6599969; doi:10.26508/lsa.201900437)
Supplement: Supplementary file 1 [file LSA-2019-00437_TableS1.xlsx]

## Sheet: wt1
Filename: c01_FAPs 14_7_16_NORM_LD_viSNE.fcs
Event #	Time	Event_length	Bar1	Bar2	Bar3	Bar4	Bar5	Bar6	Sn	Xe	Cs	Ba	Beads1	CD146 (v)	cCaspase3	CD34 (v)	pEGFR	bCatenin	CD140a	Beads2_CD140b (v)	Beads3_pSTAT1	Vimentin (v)	pp38_CD90.2	pSTAT3	CXCR4 (v)	TNFa	Sca1 (v)	Beads4_CD31 (v)	IL6	pERK1_2	Beads5_Actin	pCREB	DNA1	DNA2	Life_death	Pb	tSNE1	tSNE2
1	11670.5	48	1626.01	1666.84	1876.32	101.001	31.472	13.501	7.472	0	0	26.714	7.905	60.924	31.179	176.707	30.984	5.731	2.762	28.718	31.926	18.446	6.499	21.427	17.053	2.364	384.621	17.84	14.04	8.281	32.984	27.624	1901.61	3090.37	8.187	81.459	17.4374	-2.6166
2	12156.3	50	946.813	910.966	938.601	37.347	9.759	19.154	6.83	0.04	0	1.981	13.246	0.202	7.313	38.129	0.311	12.918	0	6.425	10.234	0	3.123	10.447	21.692	0	90.68	9.563	0.318	6.423	21.167	12.979	796.593	1447.92	25.444	90.724	-1.13998	26.0359
3	12434.6	48	570.223	586.958	589.111	42.964	13.891	3.859	0	0	1.44	0	4.329	12.665	0	17.35	0	0	0	8.598	0	0	0	0	27.03	0	164.546	2.956	0	0	0.7	0	511.117	878.721	15.224	24.368	-4.50395	15.605
4	12606.5	86	3777.26	3478.51	3937.03	193.79	56.981	28.032	8.91	0	0	0	27.526	33.9	8.951	141.667	17.371	20.646	0	56.287	21.153	16.889	15.019	10.548	78.735	8.739	481.712	18.084	23.038	5.21	38.001	49.84	2373.56	4085.15	54.12	94.384	20.6262	1.21883
5	12647.3	33	3480.36	3541.2	4079.24	146.418	66.103	21.967	28.011	0	0	0	12.098	10.563	13.573	137.393	16.746	2.378	1.445	65.237	6.355	3.221	0	54.261	61.029	2.119	701.958	29.457	14.662	6.825	204.366	159.035	5818.79	11142.9	19.308	0	20.9254	5.72226
6	12678.9	71	2683.3	2674.77	3022.31	133.347	44.243	42.26	0	0	0	37.415	8.991	27.866	24.423	81.308	11.74	3.37	0	76.259	25.322	2.226	12.652	10.909	48.742	0	538.545	76.042	9.477	6.611	52.188	38.571	3100.25	5443.53	15.891	85.749	28.3027	10.6037
7	13125.4	50	2770.63	2910.05	3234.73	169.066	46.743	19.853	10.183	0	0	1.915	3.265	53.77	39.052	143.285	18.271	7.676	0	52.615	48.032	11.246	8.908	15.614	28.849	7.709	557.74	22.246	12.571	3.841	47.753	133.008	4017.35	7074.71	15.282	147.372	20.4419	-0.430337
8	13563.1	52	3317.27	3211.61	3709.97	139.993	66.287	25.286	27.202	0	0	28.604	22.567	33.723	47.376	269.543	51.843	31.897	0.658	66.591	39.325	16.213	10.547	89.529	90.83	3.732	1149.31	90.123	11.322	15.826	337.058	361.063	6376.8	12138.7	19.518	78.199	28.601	-3.66296
9	13937.1	34	2022.69	1987.19	2381.25	79.839	33.704	28.879	2.927	2.259	0	0	2.342	21.198	16.744	23.543	0	15.11	0	17.636	10.959	5.846	0.072	5.345	15.78	0	219.57	10.485	7.464	3.473	12.232	0	2160.16	4012.04	52.6	55.352	5.07624	14.5425
10	13980.6	56	1047.55	1154.79	1179.07	31.666	30.742	12.444	6.96	1.142	0	1.383	16.698	29.506	5.855	34.923	0.19	0	0	22.591	9.133	0	0	6.238	26.386	2.532	230.617	5.554	2.255	0	19.026	16.798	1592.45	2549.94	26.099	141.465	8.81125	17.9353
11	14064.9	36	1929.79	2065.61	2305.79	67.308	28.577	13.6	3.168	0	0	0	6.588	13.456	8.134	41.765	0.72	3.977	3.071	24.851	9.571	34.536	0.11	1.836	39.938	0	323.521	33.611	12.926	5.946	23.41	7.181	2524.67	4498.34	41.624	36.442	12.1141	6.75568
12	14295.9	41	1510.63	1523.82	1758.62	57.843	26.177	12.273	7.828	1.805	0	22.167	3.117	13.724	6.855	50.521	15.021	10.373	0	38.979	17.414	3.539	0.624	1.882	39.208	4.874	456.839	30.866	3.291	5.313	31.163	100.405	2340.29	4069.38	17.195	137.794	20.4694	12.9703
13	14311.7	34	683.639	747.913	789.085	57.736	22.829	1.329	0	0	0	2.702	4.46	2.584	0.869	38.984	7.233	5.043	0	2.485	0	105.695	0	0	14.452	0	106.407	5.572	3.756	1.128	9.831	20.036	758.92	1267.14	32.995	87.502	-4.58884	7.96255
14	14435.1	46	3433.24	3275.99	3580.58	139.847	40.642	29.493	9.107	0	0	5.031	10.84	20.831	20.934	81.224	4.761	24.451	1.334	57.765	9.607	14.397	0	4.995	42.419	11.148	568.905	23.143	1.129	11.703	20.559	33.663	3270.64	5541.63	65.375	42.162	20.2759	3.33707
15	14463.4	40	2379.29	2263.19	2481.61	137.519	37.487	26.537	14.312	0.59	2.166	9.612	10.81	15.557	9.871	130.599	357.439	13.81	10.282	29.311	40.805	4.815	0	155.131	58.956	13.351	841.533	48.446	5.213	20.801	271.008	194.502	5198.55	9401.96	5.471	51.85	20.978	5.6541
16	15024.3	38	2351.68	2236.04	2504.44	102.719	24.456	9.569	9.782	0	0	9.37	1.771	5.493	15.764	52.698	16.413	2.472	0	28.551	11.939	1.289	16.453	6.569	14.598	0	378.234	12.797	14.001	6.054	46.873	40.162	2780.04	4848.22	8.383	474.54	9.49197	23.7927
17	15074.4	33	328.995	209.929	229.439	18.945	20.369	3.257	5.726	4.866	0.29	2.499	8.663	9.155	10.004	33.369	9.954	3.274	0	11.594	4.063	0	5.97	4.167	13.187	0.938	109.537	6.349	11.96	0	24.509	102.926	782.612	1540.1	20.311	84.064	-3.19568	18.0712
18	15188.2	32	1977.25	2087.97	2569.46	63.275	13.945	15.08	9.736	0	0	2.707	3.191	10.059	9.665	40.996	0.906	4.887	1.399	33.3	28.119	4.384	0	3.355	70.688	0	492.777	25.624	6.904	7.143	4.978	24.77	2700.75	4872.33	48.27	247.241	17.7737	13.8954
19	15550.7	36	3633.31	3671.93	4228.35	127.877	35.071	20.452	2.462	0	0.407	30.944	7.911	26.036	9.104	53.007	0	6.973	0	21.484	6.918	1.847	1.384	23.044	56.206	0	322.738	25.985	4.418	7.314	0	4.985	3007.1	5156.27	5.701	123.79	17.0281	16.1486
20	15570.8	33	1522.45	1381.18	1665.59	72.791	30.801	4.235	7.26	0	0	0	0.821	25.827	12.048	116.478	15.172	9.16	0	41.468	6.282	2.079	5.394	12.862	58.466	4.169	401.247	52.447	19.914	0.035	12.847	14.276	2264.21	4105.67	22.649	70.415	25.5256	12.0799
21	16201.3	43	2041.66	1862.87	2061.16	116.214	15.667	11.498	17.12	0	0	0.586	2.181	40.04	14.395	83.69	4.455	15.172	0	21.247	20.182	8.662	4.984	12.402	61.467	0	369.705	32.971	2.115	9.872	54.182	55.883	3380.8	5759.18	45.777	59.71	16.7201	9.84298
22	16533	31	2185.9	2238.22	2279.61	100.402	51.98	30.772	24.664	0	0	1.612	27.07	77.017	22.191	355.519	55.062	11.028	3.952	38.058	16.629	15.924	20.696	37.433	53.204	10.958	624.019	36.308	20.755	17.294	51.491	56.84	3354.1	6073.94	37.921	56.032	21.2737	-3.14879
23	16971.5	35	2786.55	2832.93	3199.03	137.387	37.835	19.064	4.068	0	0	20.177	12.26	24.078	23.113	133.216	21.364	15.247	0.004	66.475	5.26	5.966	7.057	14.303	96.65	1.056	726.644	62.782	0.201	7.47	62.766	44.694	4659.25	8352.2	26.374	102.861	27.9804	7.1328
24	17340.8	78	4099.9	4279.42	4826.23	219.754	55.163	19.877	10.253	0	0	16.343	46.33	114.17	62.649	439	50.635	16.299	1.235	95.222	83.574	38.944	22.835	46.552	181.117	13.507	1240.97	76.345	11.463	41.282	71.889	38.93	5704.99	10273.1	23.681	234.739	26.8862	-8.33703
25	17500.1	66	4266.78	4204.07	4593.55	178.687	54.309	30.664	0.77	1.175	0	47.693	2.393	265.403	8.712	18.274	1.388	2.348	0	0.929	6.061	6.288	0	0	0	1.872	129.075	11.791	0.321	0	2.048	12.998	1749.31	3177.29	18.085	42.121	-21.0769	11.2247
26	17641.6	56	2620.93	2660.92	2976.58	109.347	50.478	25.741	21.42	1.131	0	34.825	4.82	17.88	5.65	121.644	21.8	17.326	0	47.575	36.977	3.639	1.322	43.079	58.065	16.542	513.057	35.105	5.475	0	158.894	271.377	2680.3	5014.06	35.21	100.65	21.0657	5.50745
27	17943.7	29	1218.13	1214.84	1252.86	50.28	17.608	2.135	2.185	2.357	0	4.094	3.749	3.617	6.205	18.46	0.723	0.844	0	15.34	12.873	0	0.878	3.959	19.745	0	282.397	24.475	1.55	0	0.302	4.93	1048.79	1969.42	17.493	54.125	2.33803	29.25
28	18044.6	34	1303.68	1237.08	1278.19	54.506	36.378	2.609	10.855	0	0	0	15.188	12.886	6.289	50.425	9.822	2.304	7.176	28.487	12.025	2.898	3.429	2.272	36.929	0.748	197.447	25.59	0	3.923	13.639	2.82	1646.11	3023.6	20.109	74.401	13.9008	22.5089
29	18053.8	39	1132.95	1001.12	1159.76	27.942	29.357	3.417	3.453	0	0	0	0	4.611	8.324	47.11	4.846	6.229	6.223	19.629	4.689	3.022	1.771	0	30.343	0	137.161	6.759	0	0.903	11.006	0	1127.03	1992	32.854	60.466	5.45275	24.7733
30	18822	69	3294.14	3553.28	3821.38	184.285	70.171	28.414	10.649	0	0	11.121	8.319	24.466	7.289	77.993	8.499	4.927	1.585	72.122	25.18	19.684	15.981	14.953	82.266	10.583	811.135	68.11	1.27	1.332	45.09	39.842	4427.84	8159.41	65.814	115.625	25.4227	0.88177
31	18950.8	43	2732.86	2667.73	3033.05	140.408	40.512	37.308	21.457	3.047	0	0	22.046	44.947	57.755	269.264	36.213	22.092	6.555	46.598	34.267	18.213	6.362	33.106	64.185	17.593	537.714	20.839	32.735	27.426	77.93	179.634	3463	6181.45	21.611	64.07	21.3488	-2.78283
32	19163.9	44	1921.17	1704.94	2182.66	117.063	25.009	7.442	24.518	0	0	4.016	13.716	28.684	13.912	82.349	24.629	14.763	0	46.74	12.933	4.184	7.109	7.156	43.855	2.575	402.346	20.022	16.388	7.367	58.141	66.256	3289.2	5803.5	66.135	58.371	20.1463	13.6646
33	20117.6	31	2243.68	2519.02	2694.39	109.269	16.582	23.601	0	0	0	36.885	0	8.604	8.644	246.218	0.675	2.549	0	20.924	0	0	0	0	14.11	6.645	279.919	1.781	0	0	5.74	3.146	1364.68	2343.16	65.102	69.482	9.75591	1.08576
34	20412.2	47	2252.06	2003.9	2386.06	70.145	39.918	29.391	15.874	0	0	24.069	16.673	56.216	49.654	248.665	34.043	8.468	5.352	37.554	34.055	16.902	7.48	17.106	75.76	6.989	614.115	39.225	22.669	6.998	55.808	365.742	3876.99	6609.83	15.217	89.968	22.1265	-2.64945
35	20648.2	31	2842.96	3020.51	3175.55	159.939	37.295	21.556	7.379	0	0	9.253	22.871	22.302	5.105	44.713	2.754	9.987	0	16.278	9.211	1.733	6.164	7.69	44.316	0	448.582	29.447	16.13	0.595	17.792	6.668	3210.9	5881.63	10.224	49.778	16.5791	17.9282
36	21859.4	75	12333.7	12264.8	13746.6	654.077	151.838	70.78	0	0	0	28.146	5.175	1877.35	2.205	14.983	4.336	1.78	0	20.064	2.788	2.675	6.466	0	13.464	0	109.897	7.615	1.193	9.144	19.509	29.486	5308.98	9850	43.232	64.702	-15.5661	11.7448
37	21918.1	71	2620.56	2680.01	2705.89	136.779	47.519	30.451	25.762	1.956	0.012	28.561	15.829	21.65	5.696	92.841	13.746	9.502	0	36.565	35.76	4.804	0	7.809	57.593	0	669.94	49.991	14.492	3.966	35.134	101.479	3725.58	6423.11	39.536	92.614	24.9919	11.0367
38	22487.2	47	4732.14	4624.5	5146.9	189.957	40.348	30.699	16.423	1.974	0	0	22.997	41.014	14.232	165.656	26.106	14.856	0.08	51.543	25.554	8.643	8.245	25.727	92.4	4.321	713.829	58.426	0	13.365	18.498	247.731	4719.6	8470.32	40.803	83.09	27.3982	-0.56528
39	22533.6	48	209.332	186.893	300.713	10.138	15.233	8.956	0.068	0	0	0	4.902	20.962	0.134	26.959	10.625	15.152	0	9.526	3.944	2.398	5.757	11.467	27.089	1.945	185.986	21.051	8.756	5.073	3.002	7.524	1269.18	2461.4	8.154	44.358	5.9393	16.0441
40	22725.8	87	1918.26	1941.46	1984	81.205	34.812	5.716	5.322	0	0	0	6.805	35.885	23.296	77.014	20.581	5.422	0.375	65.9	10.035	5.058	9.645	3.118	89.551	6.375	270.012	39.42	11.391	10.066	15.171	5.087	1856.13	3380.5	20.244	115.239	23.0789	10.1964
41	23169.9	60	958.344	932.313	1059.22	74.44	41.186	10.654	16.807	7.065	0	5.406	6.633	27.066	11.577	74.71	3.752	11.925	0	34.734	24.74	6.043	0	6.655	35.261	0.371	337.281	35.548	0	0	9.408	11.175	1688.66	3061.8	31.676	71.491	18.5994	11.948
42	23595.6	54	4090.26	4248.91	4629.73	232.527	66.182	31.293	15.473	0	0	0	11.561	39.286	8.383	122.587	30.86	21.583	0.209	40.972	7.009	106.868	1.589	45.9	41.195	4.341	677.44	26.456	9.138	11.48	64.119	57.344	3753.05	6471.88	79.864	89.115	20.0917	-7.42685
43	23614.3	42	2634.5	2690.86	3005.3	104.237	38.409	18.784	27.536	0.042	0	12.922	21.992	30.613	20.968	130.126	21.483	9.912	0	58.924	35.255	3.29	1.903	7.933	68.293	1.013	641.645	36.195	2.45	11.46	62.98	76.253	4861.23	8242.3	19.874	92.98	26.9066	9.07418
44	24459.5	91	1372.53	1366.23	1442.62	49.803	32.307	30.705	9.275	0	0	8.626	0	17.279	12.753	39.01	20.956	5.987	0.32	10.589	23.371	12.972	0.371	0	26.3	2.837	172.254	3.366	0	2.256	33.4	3.3	1258.45	2331.32	58	60.356	4.87659	12.0095
45	24594.6	63	1732.67	1803.33	2235.87	82.971	28.574	17.871	0	0	0	47.407	5.146	10.374	2.386	319.061	0	2.609	0	7.77	11.886	0	9.137	0.64	13.113	0.064	187.842	17.498	0	0.943	17.208	62.57	911.858	1697.95	16.154	37.222	2.03903	7.11953
46	24683.6	42	2015.15	1927.64	2064.07	87.32	34.651	12.817	0.713	0	0	9.85	2.602	10.167	4.363	24.205	0.592	14.579	4.199	14.989	13.84	1.941	1.509	2.583	40.81	3.246	213.71	25.069	5.07	2.448	45.434	2.378	1669.74	2974.4	76.625	57.252	12.1112	22.667
47	25321.7	53	2056.13	2015.11	2225.09	105.313	34.382	19.006	18.37	0	0	17.423	8.681	41.567	20.219	176.963	22.971	12.325	1.174	17.555	17.605	14.535	11.009	19.16	46.973	8.527	479.035	28.059	20.369	2.527	13.123	78.928	4348.44	7827.18	45.005	119.503	19.6165	-0.27585
48	25405.8	43	1253.9	1259.35	1460.4	51.679	32.958	8.608	2.117	0	0	0	10.972	5.947	1.485	35.123	4.412	1.031	0.957	17.185	9.985	3.847	8.319	5.991	50.706	5.791	324.921	22.095	4.107	0	2.483	17.911	1825.3	3064.17	23.763	71.077	11.6171	25.3241
49	25717.7	37	1248.24	1177.65	1394.48	78.402	21.483	22.319	0.667	0	0	0	15.293	23.252	12.425	17.299	1.272	4.521	5.071	8.286	6.889	1.151	0	3.239	23.511	0	152.386	9.839	4.925	1.991	17.712	12.886	1161.41	2191.42	32.419	34.01	-2.08623	16.7213
50	26211.8	46	1265.88	1105.73	1207.51	70.811	17.967	20.645	6.076	0	0.619	8.443	6.968	13.303	28.357	112.201	22.304	5.695	0	20.337	36.395	6.559	6.09	6.103	16.181	2.084	235.599	13.423	25.005	3.879	14.986	24.446	1966.65	3423.85	12.928	92.215	11.2174	6.04426
51	26750	39	2469.51	2640.37	2785.35	171.441	35.335	26.828	31.537	0	0	1.788	7.789	61.091	46.758	306.223	21.928	16.206	1.373	73.159	56.905	17.968	6.693	24.349	78.219	14.679	738.851	40.277	12.273	59.005	102.146	148.13	6440.31	12056.8	25.906	51.094	23.037	-3.66275
52	27371.1	47	1547.06	1602.88	1729.14	96.029	23.656	20.302	14.012	0	0	2.469	12.074	34.847	28.041	38.082	7.174	0.54	2.24	31.522	9.475	0	8.068	21.98	29.667	0	334.233	29.77	7.429	26.736	107.179	26.796	3526.35	6420.62	14.495	63.799	18.556	17.6476
53	27388.5	31	2910.42	2777.42	3159.6	139.848	33.578	21.303	1.686	0	0	29.511	3.948	244.028	3.89	8.427	0.502	13.773	0	6.914	7.418	2.771	1.544	0	0	0	17.189	0	0	0.873	0	7.232	1315.11	2572.08	2.018	22.165	-19.4883	17.9751
54	27907.8	36	1057.74	1007.62	1269.83	59.194	13.762	4.323	5.672	0	0	4.223	6.444	5.419	2.313	38.445	10.044	3.178	0	15.066	5.355	3.738	1.785	10.862	44.439	2.306	213.072	11.438	20.378	2.693	1.437	7.522	1454.11	2627.88	6.279	60.198	6.22663	24.9152
55	28186.5	35	958.795	1001.9	1228.93	62.07	13.532	4.957	0.596	0	0	12.983	0	15.777	0	35.321	4.21	3.464	0	15.627	14.118	1.586	1.175	5.282	34.323	0	216.705	16.377	8.74	1.311	14.021	3.473	1281.43	2611.01	17.383	64.453	12.0594	21.1733
56	28197.2	34	3204.99	3464.37	3680	139.518	25.446	16.17	0	0	0	12.574	0	0	3.381	622.234	6.095	6.737	0	11.961	6.831	16.749	1.859	0	0	0	109.349	0.723	0	0	0	45.611	1393.34	2433.06	3.374	23.875	-1.33398	3.67636
57	28200.6	43	3439.85	3539.91	3976.1	172.645	29.157	26.13	3.135	0	0	61.83	0	0.333	2.748	15.054	1.696	6.613	0	5.383	10.838	0	57.647	7.712	18.262	0	168.573	9.2	1.123	0	4.408	30.542	2040.13	3604.88	7.116	68.324	-2.50785	27.0447
58	28364.4	50	935.296	879.708	912.192	42.108	11.504	12.335	3.105	0	0	0	11.402	40.327	7.853	81.879	5.696	0.25	0	11.242	7.556	3.468	0	0	14.416	0	107.946	10.618	0.53	2.124	3.66	3.076	789.921	1485.39	21.966	35.841	6.59763	15.1327
59	28375.7	33	1334.56	1297.01	1746.02	83.386	22.851	10.233	2.39	1.313	0	0	3.193	9.96	5.341	29.044	3.531	10.948	0	21.593	20.203	2.018	0.972	14.975	18.551	5.343	257.038	17.601	0	0	1.007	83.826	2022.72	3596.94	0.66	56.408	8.29109	23.2077
60	28398.7	60	1457.37	1614.48	1833.96	76.839	47.24	16.656	10.971	0	0	30.795	12.747	31.976	8.677	186.886	21.41	0.477	8.164	38.684	24.653	9.916	6.501	19.224	18.753	11.381	553.286	25.879	20.14	3.136	75.79	375.017	3320.89	6165.2	30.044	119.447	15.7827	3.86389
61	29109.4	47	2840.96	2752.36	3104.69	106.948	38.601	23.62	8.644	0	0	18.66	9.636	53.05	14.589	145.875	4.781	2.05	1.411	26.856	17.25	10.46	4.079	4.254	8.736	0	465.106	26.689	6.417	7.531	43.433	54.193	2966.28	5494.25	10.793	105.982	17.2592	-2.41476
62	29202.4	41	1274.49	1246.24	1496.87	78.471	17.448	13.917	9.445	0	0	0	4.549	32.342	3.824	25.733	1.65	5.669	0	8.138	4.485	0	2.934	2.529	30.48	0.795	139.651	19.969	5.839	0	6.339	2.936	1583.98	2603.56	27.206	40.001	5.30069	18.8811
63	29431.9	31	1636.53	1586.09	1731.26	124.378	63.055	56.205	5.703	0	0	59.822	10.667	64.255	11	79.994	13.64	12.245	0	15.341	26.68	12.181	0	7.843	40.684	0	446.111	24.316	13.919	7.471	1.501	173.568	2718.67	5130.89	11.011	46.132	15.4224	8.68449
64	29448.3	42	1238.33	1240.13	1544.95	101.047	36.257	11.164	0	0	0	0	4.143	11.62	0	22.015	1.007	2.648	0	14.561	0	0	4.024	10.104	18.319	0.46	164.281	18.96	8.692	0	4.373	11.099	1431.97	2409.1	0	71.851	6.71796	20.9538
65	29626.7	68	2168.45	2279.7	2572.78	102.874	55.088	19.452	13.638	0	0	5.374	10.961	45.6	12.37	81.086	15.496	12.265	5.244	37.715	33.957	8.57	16.957	22.309	58.96	2.325	338.177	10.726	22.785	22.733	70.26	41.684	2685.37	4893.1	28.909	104.969	16.3812	8.73954
66	29903.3	39	1913.04	1802.53	2118.3	107.192	21.317	24.615	3.611	0.712	0.348	18.216	14.153	7.576	10.603	22.187	11.211	8.263	0	18.251	3.675	0	2.524	4.015	49.099	0	295.029	26.057	1.6	1.44	14.858	17.905	2036.82	3386.18	19.058	67.039	8.28618	26.1663
67	30079.8	28	853.106	869.594	929.524	42.911	20.501	9.72	23.957	0	0	7.624	0.587	10.821	14.2	48.305	0.132	5.006	0	20.491	15.385	2.993	3.458	2.899	23.38	0	287.801	11.283	10.001	3.721	4.774	104.909	1476.82	2614.45	8.339	22.561	11.0295	15.607
68	30215	47	3620.4	3556.55	4137.26	151.123	49.123	16.849	0	0	0	2.226	1.366	864.237	9.704	15.074	0.415	6.801	0	3.227	12.65	12.281	0	6.602	13.856	1.121	89.082	8.856	5.067	0.148	0	7.823	1269.04	2505.07	17.103	58.82	-20.8199	8.33764
69	31101.6	50	1703.03	1543.83	1818.88	73.721	34.709	6.572	5.81	7.856	0	29.99	5.277	68.333	4.616	27.106	0.297	7.786	0	19.85	1.041	70.808	0	2.134	20.689	2.962	119.86	2.495	0	0	9.992	3.467	1392.67	2318.97	10.406	115.246	-7.73527	8.13828
70	31480.9	32	5335.08	5473.55	6143.15	266.25	44.584	20.858	0.791	0	0	17.894	2.976	28.915	4.224	68.025	13.179	25.908	0	11.872	8.574	0.682	1.765	7.632	22.45	0	219.038	5.723	8.436	5.135	3.456	52.641	2898.73	5674	16.55	61.802	7.30844	16.8323
71	31746.6	79	3953.99	4081.83	4558.58	168.731	105.268	34.55	7.184	0	6.068	0	40.424	23.909	20.37	127.3	20.184	13.812	1.976	74.666	30.586	8.191	4.12	11.875	74.121	11.589	535.714	68.813	9.898	8.405	55.526	55.054	4325.83	7617.92	17.674	149.113	27.1503	6.74279
72	32164.9	48	2557.71	2710.75	2936.69	166.96	35.294	16.904	17.937	0	0	26.58	6.625	18.454	21.596	132.52	3.904	9.449	0	57.953	29.352	19.427	9.465	18.816	66.655	9.815	561.553	44.315	4.558	9.311	120.079	516.979	4436.13	8069.78	36.47	74.707	22.7475	2.16706
73	32275.1	37	2643.08	2602.82	2853.72	131.31	16.568	22.675	23.37	0	0.688	18.419	24.307	27.634	17.965	210.367	25.801	34.061	0	43.605	25.739	34.771	16.565	30.089	27.723	7.2	463.882	19.511	13.989	14.77	43.337	676.067	4787.08	8920.07	21.559	42.446	11.738	-14.0063
74	33468.4	64	1664.27	1572.78	1850	53.336	38.501	16.322	10.337	0	0	0	10.281	21.265	16.81	96.09	15.04	14.141	3.911	13.928	22.896	3.211	10.083	25.037	27.128	2.197	251.825	30.621	1.989	0.161	48.989	14.933	2846.26	5207.98	30.894	66.562	14.8087	14.9836
75	33884.4	42	3311.95	3343.72	3757.55	203.122	34.183	21.292	9.509	1.857	0	12.231	0	29.926	1.864	68.861	17.354	14.907	1.925	40.998	30.906	30.586	0	36.456	78.708	4.79	616.982	30.216	4.21	0	78.344	38.607	3973.75	7251.61	37.648	67.422	16.9588	0.74802
76	34469.6	54	2224.86	2197.84	2565.65	92.83	36.21	16.886	0.234	1.657	1.015	24.399	0.579	0	1.93	91.515	0.486	0	5.357	9.471	5.766	25.226	0	0.717	1.5	4.221	340.777	0	0	1.44	0.292	22.122	1050.92	1799.87	8.868	39.913	-0.227846	2.23473
77	35289.6	42	2483.94	2574.02	2909.76	149.052	19.192	23.494	14.345	0	0	0	20.092	60.987	37.381	134.529	27.032	14.606	0	49.711	47.972	13.089	13.135	40.692	59.894	1.435	598.674	29.688	19.722	21.124	122.553	234.655	5399.22	9600.37	31.102	58.064	24.3385	-1.3328
78	35547.7	30	1039.11	947.786	1100.43	52.685	12.047	10.631	0	0	0	0	4.305	2.628	7.917	18.148	1.08	0.14	0	12.668	1.541	7.186	5.249	0.24	11.552	1.632	92.612	0.352	0	0.975	0	2.686	1149.77	1889.68	17.009	58.134	-6.26501	24.0032
79	35599.3	48	2581.49	2625.66	3105.59	124.609	42.863	32.94	18.781	0	0	9.052	14.342	27.185	17.564	122.732	11.044	12.801	12.129	35.875	20.543	0.491	4.446	6.462	53.875	1.01	615.188	29.272	17.774	0	17.145	7.47	4854.92	8587.24	23.366	85.781	25.697	13.2571
80	35745.3	57	3150.09	3270.47	3505.66	118.43	51.821	26.294	21.992	0	0	23.243	20.022	41.973	10.139	95.656	15.004	11.683	1.453	35.145	25.664	17.666	2.155	6.853	98.962	7.621	534.504	23.083	4.213	14.396	61.826	5.125	3957.24	6875.31	55.156	72.226	18.9549	1.67074
81	36518.2	47	5192.21	4922.21	5943.56	185.291	45.764	23.913	0.251	0	0	16.498	0	14.693	0	901.536	0.739	1.243	3.029	9.781	4.999	30.016	9.28	9.822	23.281	0	95.248	2.685	1.61	0	0.705	60.293	1845.61	3147.93	7.774	76.861	-3.65737	1.07449
82	36901.5	35	1900.47	1964.29	2018.47	86.171	35.322	21.813	7.821	0	0	16.913	9.704	41.425	24.871	200.033	20.27	9.017	0	38.34	11.301	21.94	9.953	9.362	89.97	13.209	434.249	33.447	3.505	11.61	27.696	81.661	3823.65	7076.52	68.531	75.046	20.7345	-1.54234
83	37035.1	29	1146.42	1160.19	1287.12	50.984	26.841	11.249	9.681	0	0	1.837	4.85	14.462	1.169	51.696	17.877	4.994	0	25.01	15.826	0.167	8.088	7.662	35.804	5.365	280.334	28.712	2.009	0	14.354	48.341	2083.82	3696.5	22.195	45.156	16.7847	19.7651
84	37245.8	28	1115.25	1107.66	1173.81	47.155	23.556	6.771	8.866	0	0	0	2.556	16.368	18.445	22.204	0.887	2.459	0	15.4	0	2.5	0.824	0	36.47	1.784	206.589	11.769	9.465	0	0	0	1205.43	2210.71	22.767	25.247	5.90862	16.8836
85	37284.4	61	4145.92	4102.03	4647.9	255.867	35.371	38.245	18.883	2.966	0	10.283	18.388	74.322	52.374	331.792	32.88	54.813	4.026	86.857	64.631	23.063	22.191	62.953	83.321	11.706	1093.75	27.577	26.721	16.81	164.177	320.703	5578.37	10181.8	34.735	130.044	23.6622	-5.39843
86	37406.8	27	1258.64	1390.51	1540.75	69.285	30.185	25.472	6.105	0	0	2.42	4.176	8.118	0.642	62.2	12.163	0.06	0	28.411	9.945	4.788	2.936	21.093	20.193	0	256.856	26.604	0	0	84.103	60.748	2957.17	5107.59	14.227	42.557	11.3276	12.3558
87	37743.1	31	1953.87	1966.75	2118.57	56.209	54.015	11.749	15.962	0	2.276	9.128	15.333	12.232	6.843	77.964	13.857	10.979	2.637	43.612	24.101	5.544	4.066	6.316	43.708	1.515	319.906	21.381	19.001	1.694	8.413	11.072	3181.86	5223.11	15.737	156.996	18.6676	6.73218
88	37911	35	2843.41	2786.12	2933.13	95.226	46.211	13.043	2.43	1.098	1.457	0	0	15.309	23.023	49.732	8.43	6.854	0.734	31.802	5.554	11.171	0.377	8.524	18.317	2.371	263.476	37.197	3.252	2.102	2.054	24.637	2296.21	4080.95	36.337	58.693	12.4042	9.15401
89	38047.8	36	1566.75	1664.19	1773.94	130.397	31.119	23.032	18.143	0.743	0	10.679	13.274	18.709	20.35	90.277	11.559	9.73	3.152	36.429	31.951	6.792	7.462	37.149	42.161	4.677	314.75	30.387	13.678	27.679	91.514	148.238	3333.01	6180.07	14.931	58.2	18.391	5.74887
90	38346.3	45	1783.12	1862.14	1773.47	110.712	23.63	18.528	16.544	0	2.145	10.347	3.175	14.693	12.445	59.301	11.483	8.473	2.923	46.795	12.003	48.144	0	0	30.597	5.854	341.369	22.851	3.865	1.687	16.845	15.744	1963.73	3508.07	56.973	73.332	13.8095	1.49457
91	38429.7	38	3196.96	3440.33	3975.96	139.634	44.905	27.636	2.253	0	0	3.752	14.796	29.285	1.251	38.655	4.341	10.295	0.91	28.519	35.423	6.549	1.507	12.375	49.592	3.666	633.409	40.811	7.81	0.197	37.759	14.07	3671.06	6853.38	33.806	77.056	20.1633	9.60184
92	38689.3	41	1812.9	1788.59	2063.49	63.988	27.753	25.051	18.621	6.676	0	0	14.813	25.347	10.634	62.705	9.027	6.546	0	40.342	14.13	11.224	3.272	3.635	45.421	0	310.96	23.738	4.485	5.844	16.499	229.22	2498.44	4802.55	17.476	93.438	18.1885	9.26785
93	39217.3	65	1738.78	1713.17	1988.92	106.989	29.232	12.248	2.684	0	0	0	9.458	18.386	7.225	70.885	3.423	5.882	0	32.98	2.96	0	0	12.888	46.068	2.557	366.221	25.317	9.585	7.518	3.503	10.307	2572.99	4488.02	9.925	68.22	18.2373	19.799
94	39719.6	29	768.995	802.381	876.554	22.464	11.837	7.698	11.176	1.14	0	0	4.741	4.484	8.213	9.135	0	3.625	2.868	20.346	2.753	0	0	0	26.987	3.147	108.627	9.126	0.912	6.034	5.479	10.066	917.123	1735.01	19.118	8.52	-1.02246	31.0938
95	39752.4	43	3218.05	2996.21	3683.68	159.143	27.13	19.096	6.706	0	0	43.623	4.733	9.543	8.192	7.314	0	0	0	8.455	0	5.701	1.286	0	23.036	0	113.46	10.278	0	0	2.35	0	1276.3	2351.84	3.407	56.016	-2.88758	21.536
96	40165.1	49	1279.24	1192.65	1333.53	45.587	12.185	18.504	9.749	0	0	0	10.65	33.564	20.458	89.829	14.159	9.213	8.181	20.331	46.236	8.872	1.419	6.249	26.023	6.098	250.152	28.807	19.222	15.413	20.922	110.54	2361.08	3974.32	22.653	92.531	15.4272	9.72677
97	40317.3	58	2072.89	1983.37	2279.55	121.332	34.226	11.812	0	0	0	72.839	0	4.698	0	78.463	0	0	0	5.148	3.399	9.425	0	1.039	8.11	0	34.273	0	5.756	0	14.136	8.862	763.15	1327.46	12.907	17.684	-1.55055	7.38746
98	40358.3	36	2475.24	2235.5	2536.72	130.629	61.084	14.246	38.851	0	0	29.351	7.94	56.422	26.765	228.74	49.035	38.101	3.736	32.924	32.965	26.269	10.152	26.795	26.925	16.147	703.852	33.022	20.436	47.982	51.9	108.641	4842.77	8605.1	15.208	78.838	18.5907	-3.1189
99	40447.4	30	4141.11	4141.67	4873.58	167.253	19.32	15.732	0	0	0	20.884	3.026	26.424	8.504	45.797	0.487	7.019	5.202	19.418	12.881	14.445	1.133	0	20.778	8.674	109.072	6.549	0.249	0	1.343	38.602	2344.67	4788.81	5.157	46.621	5.81723	10.988
100	41186.9	26	639.916	606.534	748.442	26.352	16.583	2.18	0.379	0	0	0	0	0	2.568	31.02	6.8	2.634	0	5.019	5.265	4.778	4.543	2.158	20.042	0	134.447	22.107	0	4.24	5.162	27.35	1111.55	2089.64	11.058	44.692	0.245983	26.5203
101	41231.4	47	4814.07	4476.88	5224.4	195.306	48.705	29.763	3.623	15.984	0	35.715	0	7.327	2.374	992.549	0.682	0.925	0	8.33	0.01	218.193	1.265	2.648	35.597	3.744	564.797	12.915	0.563	5.696	3.012	9.584	1250.71	2156.68	10.34	62.588	-7.56449	-5.64834
102	41724.4	46	3130.46	3146.69	3588.96	144.116	54.351	35.471	15.372	0	0	0	18.328	12.728	18.062	70.993	11.242	6.006	1.658	43.49	34.016	0.759	0.787	22.63	59.609	8.996	541.956	32.474	12.726	0	53.833	226.48	4941.19	8318.99	19.302	81.294	23.7278	17.0424
103	41732.9	44	3322.7	3204.28	3873.38	172.734	37.614	17.017	6.367	0	0	0	9.678	28.942	5.919	47.675	31.828	18.17	0	55.1	42.451	63.196	7.206	68.009	32.023	2.081	647.136	45.021	17.322	5	97.665	50.185	4615.72	7432.85	69.446	79.153	18.6119	-6.89605
104	41810.2	48	2356.05	2250.21	2633.77	108.824	30.091	19.59	5.504	0	0	2.347	2.881	23.218	0	15.871	7.84	1.296	0	21.282	4.483	3.355	0	0	58.878	1.585	470.253	23.333	8.553	0	0.677	0	1829.05	3333.11	46.703	41.176	13.3586	18.3725
105	42417.5	58	1247.78	1095	1256.79	73.303	44.269	25.003	4.315	0.854	0	5.92	13.007	21.646	11.052	51.536	0.813	15.221	0	31.25	9.059	3.112	7.089	0	56.877	1.121	366.166	33.975	14.369	1.531	31.75	11.224	2006.74	3497.82	32.846	85.947	18.5167	14.4062
106	42646.5	32	961.113	994.866	1133.91	44.276	5.817	14.23	5.982	0	0	0	18.987	32.784	14.493	83.793	17.102	0.472	0.523	17.41	15.177	4.026	4.154	12.595	8.231	0	181.07	16.465	6.138	7.032	12.581	11.003	1608.28	2758.56	6.754	49.861	8.62536	14.7486
107	42722.7	41	1919.59	1884.59	2241.46	168.056	48.493	22.068	16.743	0	0	6.759	5.329	68.255	10.813	117.204	24.821	11.637	0	105.908	24.901	0	5.186	60.9	126.29	7.268	541.503	86.506	8.719	0.601	214.204	122.585	4464.22	8212.14	32.947	47.933	31.3223	6.01546
108	42754.9	31	1948.86	2097.87	2117.09	98.393	37.767	11.723	0	0	1.654	0	0.568	30.855	4.105	39.06	8.745	2.702	0.373	29.322	10.516	15.963	12.486	1.556	25.828	5.013	231.66	15.222	1.135	0.242	33.38	2.393	2400.19	4057.95	27.737	64.115	8.38942	9.58963
109	42766.9	38	4544.91	4750.35	5295.1	132.202	45.276	9.48	2.597	0	0	94.657	2.786	10.142	7.679	52.261	10.57	7.251	0	16.724	7.669	13.83	27.248	16.897	47.193	0	287.493	18.853	0	15.751	16.645	399.025	2249.36	3832.16	9.32	148.027	11.1315	9.38467
110	42944.2	53	705.411	736.243	884.084	54.666	15.721	1.844	7.427	6.11	0	16.946	6.381	40.022	30.606	138.16	51.998	6.906	2.449	22.802	30.1	25.865	15.355	20.96	22.494	4.085	146.729	3.854	9.997	9.68	15.622	94.784	1049.03	1783.17	1.212	52.935	6.59454	7.89916
111	43733.1	48	6013.97	6033.1	6982.76	222.653	83.537	37.077	4.592	0	0	30.725	1.835	393.005	5.896	61.215	10.024	13.441	1.203	37.63	44.128	9.434	7.574	13.454	384.26	7.771	1449.2	41.408	8.351	8.02	152.673	24.547	5034.49	9183.68	33.548	73.971	-10.672	10.1852
112	43785.5	37	2789.6	2908.51	3001.06	107.854	25.459	15.399	8.517	0	0	0	11.428	27.5	5.848	41.512	0	24.172	0	50.364	22.555	10.016	2.716	12.212	67.081	5.232	364.361	22.741	7.371	1.846	21.686	14.201	2889.23	5221.27	31.528	105.574	18.8645	9.55986
113	43911.3	60	2954.46	3097.44	3233.9	185.054	83.659	49.078	17.836	0	0	17.951	41.059	27.754	14.405	195.861	23.655	16.17	2.19	98.887	44.422	23.209	6.028	15.402	57.083	5.165	687.046	79.321	6.47	18.044	40.765	46.129	3634.87	6443.52	6.838	230.054	23.8337	-0.860435
114	43946.4	55	472.543	525.832	535.625	31.096	10.253	11.701	3.425	0.197	0	57.179	2.86	11.439	6.256	21.56	0	0	0	5.195	0.312	0	4.52	10.086	4.59	0	49.99	0	0	0	29.96	1.657	767.496	1375.2	78.92	97.043	-10.1268	17.1974
115	43961.6	56	1592.05	1477.48	1648.03	107.82	25.987	28.362	22.83	3.16	0	6.638	23.592	107.827	33.315	246.325	57.192	10.235	3.61	54.548	49.756	30.243	1.019	42.276	64.325	8.662	433.223	31.074	18.763	19.504	57.083	340.344	2766.38	4724.71	25.778	102.276	22.8497	-5.78616
116	44341.7	37	2659.8	3043.08	3318.24	130.902	42.64	23.23	11.633	0	0.264	2.263	3.887	25.192	6.847	67.374	6.41	10.132	0.743	48.867	9.329	12.686	0	8.789	18.979	19.273	486.409	32.796	6.631	2.081	23.573	20.598	3343.53	6165.31	15.906	29.989	17.7957	4.75348
117	44709.9	46	1135.05	1157.24	1215.47	79.155	14.676	2.245	6.312	0	0	6.428	8.628	36.686	18.972	81.227	22.295	3.686	0.395	27.865	20.539	6.157	1.758	22.611	38.84	0	227.454	21.816	0	8.477	13.811	14.374	1846.4	3220.7	11.22	57.854	16.199	11.043
118	45799.3	68	1205.94	1235.45	1574.54	77.616	35.48	13.593	4.911	0	0	5.59	16.758	20.823	3.498	77.122	14.469	1.966	0	29.004	17.317	7.069	4.451	11.525	44.705	0.444	196.898	12.358	2.679	0.435	13.462	17.094	1408.94	2399.98	1.984	97.438	14.3114	11.9279
119	45854.1	47	2849.21	2796.41	3188.23	132.877	18.403	13.476	13.739	0	0	0.438	8.108	35.657	21.156	84.805	20.242	5.817	1.488	18.618	21.487	8.56	3.937	8.279	33.509	6.017	365.597	23.564	25.325	9.952	13.443	12.855	3083.15	5495.84	13.169	101.517	15.7185	9.75679
120	46213.9	51	2466.03	2216.88	2608.38	172.167	45.692	34.507	38.782	0	0.713	24.133	19.117	120.618	44.832	465.276	80.956	28.068	0	66.182	39.735	52.588	15.201	145.013	89.029	13.318	1090.96	60.713	23.674	37.413	319.573	832.729	6045.33	10798.6	21.432	78.895	25.0949	-8.41771
121	46383.5	66	1796.1	1761.24	1790.78	93.651	55.799	11.662	22.74	0	0.836	0	15.718	13.56	7.49	88.575	4.449	7.256	0	29.113	17.622	5.25	0.332	10.604	46.592	0.63	405.823	59.804	0	5.635	17.658	83.402	2980.54	5107.79	5.852	95.486	21.2395	12.0738
122	46488.8	41	1117.6	1075.93	1268.37	59.786	18.868	7.976	0.958	0	0	0	2.822	21.701	1.093	23.742	5.8	0.773	0	31.24	15.573	2.329	3.27	1.795	22.505	0.383	183.301	0.37	8.071	0.097	10.776	1.695	1407.82	2535.22	9.793	67.145	-2.0188	14.0295
123	46614.7	62	2378.64	2418.03	2733.7	130.522	67.206	12.968	14.072	0	0	27.777	12.222	100.145	22.167	221.309	13.54	12.093	0.887	52.108	17.243	13.944	0.572	8.084	75.523	10.272	537.755	41.446	14.82	9.877	43.882	44.051	3258.65	5942.07	44.98	75.991	24.3845	-3.41612
124	46796.1	45	2444.77	2209.98	2670.62	117.206	23.411	3.965	15.613	0	2.692	10.169	10.118	26.032	14.19	63.903	8.616	4.836	2.677	45.839	31.271	5.628	0.586	4.224	41.315	0.135	518.649	31.026	7.775	0	31.427	31.897	2707.07	4794.02	38.097	77.351	21.6217	11.6792
125	46918.7	33	1425.85	1361.08	1605.32	71.883	33.881	10.249	4.845	0	0.922	7.489	3.96	12.157	11.569	30.82	3.706	6.955	0	24.454	5.506	0	4.861	2.991	46.637	8.255	309.567	16.321	0	7.308	16.4	55.477	2068.36	3844.71	23.668	54.431	13.5951	22.4204
126	47131.5	28	1080.87	1217.62	1205.05	74.689	11.107	12.454	1.151	0	0	13.595	3.644	22.906	8.567	109.267	7.87	14.989	0	14.351	32.269	13.252	4.511	19.918	21.011	9.258	264.315	28.047	13.866	12.516	15.206	28.989	2161.53	4073.35	16.894	17.134	12.4084	5.13356
127	47647.7	44	3577.82	3442.14	4359.14	161.154	30.801	15.38	0.31	0	0	29.287	0.83	2.53	8.15	485.735	0	0	0	18.22	5.233	22.681	4.197	2.266	35.014	1.65	561.651	0	0	0	2.123	0.982	1341.57	2250.02	12.292	106.103	10.1787	-4.99849
128	48075.8	58	2407.47	2211.8	2530.51	131.636	58.999	26.02	21.129	0	0	28.242	19.325	38.696	26.068	98.155	27.971	5.375	3.61	74.82	35.093	15.9	1.211	26.511	81.08	4.118	574.402	60.898	21.261	19.562	33.592	51.754	4956.41	8880.34	30.121	83.399	26.4058	-0.930567
129	49324	50	1659.94	1770.01	1915.32	85.997	33.495	2.155	0.633	2.546	0	1.102	4.818	37.703	1.374	30.646	5.592	1.834	0	9.723	12.438	4.337	4.416	19.986	12.049	0	131.262	18.136	0.743	3.513	16.811	18.4	1074.29	2030.34	31.602	46.025	7.14042	14.851
130	49608.2	59	1967.64	1880.82	2235.75	113.358	44.54	21.672	1.453	0	0	58.144	9.94	13.75	11.799	13.244	0	0.114	0.235	23.513	8.865	0	3.912	2.04	47.437	0	240.483	8.037	0	0	27.065	4.531	1217.06	2096.09	79.082	61.606	8.34871	20.0736
131	50023.1	28	1960.8	2015.17	1905.23	88.339	18.534	12.763	0	0	0	44.792	0	20.332	0	12.682	0.5	0	0	15.983	5.837	1.514	0.304	0	5.995	0	20.399	0	0	0	0	0	1330.88	2522.57	50.253	47.22	-10.8638	15.2725
132	50553.7	28	666.265	662.859	757.476	50.854	11.777	3.997	19.39	0	0	1.045	3.365	10.652	18.902	91.239	16.937	3.055	6.134	7.879	12.192	11.978	4.678	35.033	22.912	2.25	318.697	5.863	4.839	20.15	40.338	6.266	1037.76	1963.8	1.107	100.96	7.6129	6.31678
133	50598.2	40	2284.72	2168.4	2417.04	119.264	34.492	30.312	2.756	0	0	3.37	6.092	6.171	9.883	67.841	4.771	10.266	0	29.38	16.928	12.396	0	5.057	46.612	2.234	373.716	22.776	4.659	0.912	21.859	13.812	3327.03	5740.02	40.458	56	11.2698	9.89023
134	51069.9	33	734.259	797.596	757.279	37.633	7.852	3.845	5.319	0	0	8.807	15.599	14.078	20.883	50.456	16.671	3.173	8.526	31.696	10.413	4.905	4.048	13.044	11.325	0	133.702	15.141	3.912	3.741	3.304	11.98	716.74	1381.11	6.94	70.584	4.75676	16.2879
135	51309.7	31	1907.22	1803.66	1940.91	109.439	23.709	17.878	26.295	0	0	22.622	25.021	48.228	38.687	256.007	24.411	12.824	3.166	28.734	12.472	15.651	22.706	38.024	59.912	11.051	534.631	48.785	19.341	18.498	65.434	87.053	4788.36	9010.01	0	16.424	21.1131	-2.45947
136	51481.1	34	1802.57	1753.52	2046.72	80.525	44.394	29.871	32.417	0	0	0	20.455	29.918	29.048	125.234	54.159	3.469	0	33.488	16.318	10.783	6.563	33.179	31.492	14.531	414.17	22.189	4.163	4.351	126.86	67.368	3293.42	6093.26	23.531	43.148	15.7613	4.32827
137	51598.5	30	4619.27	5124.15	5834.88	203.012	19.38	15.136	0.462	0	0	5.128	5.371	4.048	3.421	674.686	1.648	0	0	13.04	14.264	124.14	0	0	1.275	1.638	51.284	0	0	0	0	0	2160.92	3749.91	6.687	16.011	-2.81882	2.7874
138	51823.6	67	3257.54	3202.9	3676.13	175.758	75.304	27.955	8.776	0	1.202	31.482	5.078	45.649	14.91	111.476	18.414	20.403	0	97.796	22.183	5.187	0	39.829	81.915	4.435	567.528	51.072	17.619	11.677	83.304	994.38	5210.74	9432.8	50.57	109.447	28.2104	5.99689
139	52301.9	47	4414.53	4268.87	4765.81	125.845	79.574	29.269	3.524	0	0	42.453	0.001	5.665	0.992	677.291	3.438	0	0	22.038	3.743	0.499	15.055	7.59	13.938	1.001	1872.06	9.93	1.426	1.545	0	11.021	1287.53	2614.02	13.641	214.258	18.3912	-12.0465
140	52483.1	39	3858.98	4093.65	4652.2	174.459	42.061	17.614	19.776	0	3.058	22.235	7.837	24.829	20.663	166.812	23.774	12.286	0	90.346	28.641	11.644	9.16	64.416	130.219	7.34	970.557	83.961	32.139	9.383	182.67	675.468	5598.45	10337.5	15.689	143.836	29.8777	-2.01695
141	52678.8	91	7008.65	7044.17	7415.04	384.945	100.179	109.551	0.813	0	0	37.627	7.162	827.25	3.432	9.184	1.318	1.538	0	22.061	4.18	10.792	2.295	18.242	8.941	3.738	98.859	4.445	0	0	4.406	18.094	2049.27	3764.21	10.78	64.803	-16.5564	10.5605
142	53040.1	36	8946.92	8444.68	9908.45	443.85	62.634	48.661	1.496	0	0	0	0	3.477	0	6	0.42	0.026	1.448	3.743	1.064	9.416	2.293	1.934	15.888	2.877	49.673	3.703	0	0	4.671	0	3885.8	7120.64	13.978	26.821	-10.0963	28.5793
143	53297	35	3226.19	3414.34	3894.35	125.063	48.994	19.862	14.921	0.232	0	3.596	13.136	25.348	17.254	62.809	4.522	15.805	1.022	68.195	11.876	20.541	3.202	27.531	63.269	5.393	593.779	45.683	21.446	10.334	60.221	88.734	5918.36	10510.7	18.238	70.992	22.8829	2.22508
144	53434	36	1230.69	1305.81	1382.91	65.087	14.633	22.355	1.363	0	0	0	1.067	18.715	0.525	40.867	0.147	0	0	8.252	15.263	4.831	1.276	6.803	24.07	5.67	131.833	9.885	1.204	0	0	3.524	1097.31	2100.63	15.661	32.602	5.68685	14.5895
145	53715.8	45	1646.07	1661.77	1676.06	101.122	33.041	26.665	15.763	4.026	0	10.995	10.031	45.122	13.158	114.443	10.306	20.558	0	30.458	19.305	7.22	2.857	9.411	72.391	0.979	342.075	29.447	10.716	18.519	64.561	329.545	3096.11	5640.45	22.23	96.797	22.4521	7.19764
146	53880.5	52	5681.94	5949.79	6752.2	219.997	71.577	25.915	6.46	0	0	24.693	10.59	50.376	10.391	84.702	13.443	10.024	0.258	34.425	6.5	8.088	1.236	8.017	37.507	3.466	305.032	26.033	8.611	0.125	28.59	57.631	3517.38	6561.06	19.16	56.984	17.3237	10.2415
147	54128.1	34	3005.22	2898.34	3293.74	155.224	37.338	13.747	30.017	0	0	0	0.338	16.138	13.23	143.051	11.616	44.545	3.552	34.176	45.677	17.674	9.945	13.053	40.79	3.361	642.616	17.196	12.57	4.988	68.259	690.449	5853.29	10576.3	11.47	15.846	15.3037	3.43508
148	54999.5	33	6851.76	7071.42	7837.18	310.842	75.682	31.898	3.453	3.967	0	23.669	5.121	396.928	0.615	25.58	0	0	0	2.47	3.718	1.441	3.89	1.249	0	0.408	158.218	0.457	0	4.748	0.048	38.858	3661.38	6305.07	4.885	27.595	-22.1903	16.1151
149	55092.9	32	954.762	939.612	940.755	55.904	17.869	11.083	1.741	0	0	0	2.568	20.075	7.771	63.742	14.549	8.504	0	8.734	8.002	0.287	2.255	6.967	6.62	0	128.773	13.98	0.587	26.157	19.304	2.342	1334.32	2304.4	15.521	20.019	-1.63817	19.8931
150	55160.3	31	966.56	972.15	988.571	42.274	23.801	5.214	4.247	6.862	0	0.313	5.74	30.513	1.033	33.337	5.219	0	10.994	8.741	0.842	10.028	7.049	5.689	20.13	0	204.185	4.867	0	0	3.866	4.331	1171.82	1844.76	49.888	55.194	5.71695	12.0719
151	55527.3	58	3172.41	3150.57	3553.93	159.441	50.525	24.361	18.147	5.481	0	14.531	16.56	82.299	32.976	252.073	20.669	12.969	0	54.209	27.815	123.673	10.138	24.349	62.963	8.517	739.634	52.627	20.809	15.036	41.497	68.245	3769.35	7007	30.228	94.772	21.9109	-8.38882
152	56350.8	69	3953.86	3939.65	4241.61	178.467	60.202	13.589	0	0	0	30.961	0.331	8.269	3.46	333.788	1.274	0	0	11.306	0	0	0	0	0.962	0	279.55	11.103	0	0	0	0	1191.64	2149.65	6.967	64.402	1.06942	5.36837
153	56352.2	30	1042.29	949.277	1058.84	33.897	13.198	3.307	9.047	1.703	0	15.053	4.545	21.894	7.271	50.063	0.524	7.086	0	14.355	4.823	0.824	0	4.21	6.911	7.132	180.062	16.93	2.619	9.289	3.89	5.022	1602.54	2885.41	9.878	43.427	7.19798	18.0217
154	56486.3	36	1395.97	1446.9	1623.15	72.291	25.932	12.622	8.684	0	0	18.43	9.44	11.866	11.357	9.48	7.388	2.478	0.072	8.875	2.537	1.842	1.75	1.267	22.593	0	254.676	18.544	12.53	6.338	12.908	14.829	1325.83	2443.51	31.755	43.714	0.348234	17.046
155	57191.2	32	3532.75	3565.33	4060.07	142.658	44.11	13.793	0.227	0	0	20.421	1.612	5.68	2.599	372.632	4.788	0	0	49.305	8.084	24.787	0.467	1.959	15.654	0	851.972	12.769	0	0	5.865	1.568	1766.94	2867.68	17.485	18.144	10.7278	-9.02961
156	57344	35	1363.71	1586.28	1542.37	97.726	26.13	16.952	9.886	0	0	1.027	21.507	28.201	0.118	47.267	4.442	8.155	2.669	38.722	21.944	29.14	10.875	22.907	51.919	0	263.621	57.12	8.953	15.823	11.73	34.074	2546.08	4784.39	19.088	53.081	16.578	1.38737
157	57346.1	30	569.113	632.593	615.05	29.078	4.831	2.783	2.679	0	0	6.852	0	7.632	0	7.201	0	0.103	0	5.283	3.479	1.276	0	4.727	7.632	2.394	139.647	3.138	0	0	5.542	0	599.147	1253.69	3.893	4.6	-8.01403	18.1547
158	57432.2	37	1294.22	1310.26	1327.97	72.571	22.793	19.084	15.372	0	0	0	0.783	8.56	4.979	45.179	6.336	4.03	0	35.306	20.308	1.976	0.03	0	53.498	1.538	371.426	17.349	5.569	1.427	16.546	31.594	2108.18	3912.99	4.562	44.545	14.169	25.3391
159	58006.8	64	2403.66	2483.12	2618.57	131.003	53.176	45.072	22.464	10.857	0	13.42	26.852	37.736	19.367	180.007	53.461	20.574	6.923	75.033	71.941	13.485	12.216	119.997	91.554	9.055	655.929	25.725	20.628	13.129	224.762	160.51	3680.02	6668.12	34.148	89.318	22.1236	-0.247885
160	58191.3	31	1350.11	1300.71	1612.5	50.195	11.571	2.911	1.975	0	0	0	0.976	10.965	5.511	22.438	0	0	0	13.88	5.583	1.15	0	0.858	13.317	0.613	97.143	2.676	5.459	3.686	7.703	2.587	656.904	1376.61	1.519	32.023	-6.01076	15.4291
161	58656.9	38	1870.41	1834.7	1966.41	78.558	12.421	13.267	18.433	0	0	0	18.729	12.683	12.433	70.652	12.459	4.425	3.52	33.978	32.575	11.542	12.677	23.613	47.581	0	539.152	26.843	16.858	3.674	79.785	21.233	2664.66	4468.79	7.448	88.418	18.7257	6.03327
162	58943	36	1320.32	1527.72	1724.68	59.551	18.714	0	1.248	0	0	1.826	2.449	3.255	4.743	18.539	0.949	1.492	0	17.169	2.765	23.434	0	4.762	17.706	1.632	191.406	11.051	4.477	0	6.042	13.687	1306.85	2513.31	19.831	31.517	0.648859	10.9225
163	59660.1	68	1019.49	1165.97	1189.81	58.831	26.409	20.752	20.756	0.134	0	0	9.508	24.334	28.476	72.981	9.295	6.678	4.128	29.921	15.754	9.114	7.307	20.927	9.132	1.63	292.585	32.912	12.101	0	6.539	25.422	1528.44	2663.02	31.143	75.226	12.5497	5.97148
164	59672	78	2223.77	2329.27	2642.86	89.634	40.061	23.95	15.714	0	0	7.684	13.353	20.728	0	40.163	0	0	1.337	24.514	14.191	8.262	0.583	13.357	58.987	0.39	387.889	12.149	1.883	0	3.545	15.652	2481.94	4186.5	51.48	80.956	13.8327	11.1453
165	60006	35	4146.31	4176.15	4698.21	183.668	30.341	16.648	2.374	0	3.321	39.115	0	1012.94	3.382	29.565	0.678	5.369	0	4.734	10.83	42.539	2.163	0.996	11.05	5.608	129.485	2.008	0	0	0	6.2	1505.55	2738.09	2.827	68.359	-20.7528	5.51188
166	61064.6	63	1904.55	1768.82	1915.76	94.258	18.766	28.969	2.232	0	0	3.613	1.286	10.182	56.966	48.11	1.496	3.982	0	17.83	46.177	0.638	4.616	1.3	45.848	4.476	329.839	14.055	12.975	4.664	249.858	11.705	1291.39	1918.09	10.847	28.302	12.4993	21.8123
167	61112.2	45	3611.33	3819.03	4118.43	238.341	51.363	17.635	0	0	0	22.626	10.431	52.2	19.232	171.198	15.98	9.118	1.608	31.078	25.144	10.376	2.571	11.65	37.313	7.931	202.73	13.265	14.3	17.539	16.384	84.46	2943.22	5470.28	12.252	99.677	14.8759	4.79712
168	62010	33	1096.55	1175.39	1245.28	42.692	22.078	0.074	0.5	0	0	6.079	3.972	16.098	0.644	36.426	16.919	0	0	30.582	0	0	0	0.054	22.471	6.762	282.826	27.695	0	3.1	2.393	1.427	1818.51	3324.58	26.338	45.286	15.2971	20.1667
169	62146	30	2091.53	2002.18	2395.47	73.354	30.862	13.781	12.253	0	0	12.917	2.673	14.756	11.519	109.174	19.627	13.025	3.65	15.738	42.467	0	0.652	10.723	38.747	13.734	589.756	12.237	7.914	3.672	28.092	24.555	3937.97	6812.65	18.711	47.486	15.1681	16.188
170	62244.9	42	3929.58	3869.85	4270.63	168.322	37.463	47.606	30.141	0	0	27.744	32.836	36.363	26.971	252.272	29.83	25.677	3.468	99.1	32.273	7.407	16.319	29.376	52.478	0.327	997.696	54.358	20.395	16.889	62.861	68.65	6386.77	10882.1	18.14	59.348	29.0615	-0.0478632
171	62742.3	43	2286.18	2445	2950.76	126.692	41.681	15.621	0	0	0	35.872	1.114	353.08	2.552	27.098	3.318	10.81	0	7.585	0	2.195	1.816	0	12.315	0	125.337	2.697	0	0.247	2.006	0	1226.06	2026.5	12.262	24.455	-25.5191	12.2092
172	63031.1	74	2177.57	2407.76	2655.04	121.591	45.405	14.521	40.658	3.097	1.365	14.138	9.217	30.043	24.293	121.643	28.324	13.5	1.073	35.173	45.063	12.946	7.507	24.466	61.842	7.115	527.853	62.244	20.811	9.326	87.686	148.272	4497.22	7957.29	3.303	171.37	22.1341	1.59014
173	63541.1	28	1660.85	1624.68	1808.7	91.546	33.866	19.754	11.9	0	0	0	9.494	1.766	9.379	55.695	12.674	4.656	1.397	21.658	6.389	6.576	2.301	9.064	51.833	4.602	409.31	14.139	3.084	3.27	21.382	72.117	3119.42	5780.1	11.696	92.729	10.8316	10.6882
174	63924.3	55	2160.91	2190.27	2223.41	118.74	61.975	41.065	27.707	1.594	7.398	34.745	38.016	136.024	72.935	434.45	47.983	20.174	8.062	54.242	49.281	30.995	7.226	49.107	47.744	19.596	703.594	50.357	19.849	27.284	65.431	102.622	3945.72	6802.53	36.164	88.303	24.1887	-7.39048
175	64094.4	57	1775.64	1849.4	1991.89	104.963	30.251	19.065	4.33	0	0	25.475	6.66	6.943	0	65.645	6.944	7.131	0	32.805	15.753	5.431	1.475	6.415	38.151	1.089	274.125	21.907	7.247	5.832	5.607	13.464	1858.82	3347.82	13.103	57.961	11.3395	11.0422
176	64254.2	40	998.44	874.318	1045.71	48.096	13.597	0	7.611	1.142	0	12.795	7.43	1.125	1.173	17.488	1.455	1.584	0	8.235	0.956	1.046	4.536	1.631	22.371	0	58.592	0	2.906	0	2.878	6.024	960.355	1765.17	25.405	64.863	-8.43936	26.1744
177	64407	34	1343.21	1266.97	1465.82	71.838	18.178	9.172	13.69	0	0	0.285	9.448	37.141	14.599	71.892	9.412	12.317	2.214	20.456	11.527	10.391	0	14.547	20.459	9.42	210.035	18.794	0	7.964	14.78	44.92	2084.14	4050.55	22.917	53.747	7.51356	9.93218
178	64698.4	30	1152.59	1115.82	1211.41	57.148	22.915	9.739	0	0	0	0	4.704	14.29	5.836	41.896	15.732	12.274	0	16.191	1.849	0	0	4.947	10.297	0.3	104.19	11.649	6.52	14.638	14.342	8.908	1130.97	1964.72	9.953	58.105	-2.09195	19.2181
179	64807.2	32	2512.15	2566.58	2702.18	123.655	30.905	19.283	15.269	0	0	10.541	12.901	21.444	39.454	141.67	22.188	25.495	0.962	40.028	41.231	3.776	1.514	41.229	34.917	9.599	494.886	19.274	7.644	10.94	46.613	65.954	3700.33	6626.6	14.668	44.933	18.8803	5.094
180	64942.9	45	804.956	881.463	912.117	40.465	28.704	2.654	1.709	0	0	11.546	1.517	21.293	7.121	59.966	4.056	8.811	1.502	4.974	13.653	8.358	9.861	2.202	10.819	0	233.505	8.262	13.787	15.691	11.463	23.084	1219.53	2202.26	58.019	37.836	-1.9177	12.2174
181	65085.2	29	491.275	492.067	500.89	36.25	17.536	7.992	8.503	9.523	0	6.462	5.802	0.419	2.289	49.715	7.841	0	1.068	10.774	5.518	2.64	7.651	0.128	17.028	4.775	252.484	10.758	0.526	7.231	13.751	1.668	1972.53	3392.04	68.045	19.046	0.700213	25.6572
182	65228.9	46	1076.04	1165.13	1380.06	61.943	37.136	27.179	27.997	0	0	0	15.599	18.574	30.623	116.242	16.316	15.179	0	44.582	25.823	3.212	0	13.634	46.547	10.1	488.057	6.273	20.064	17.786	80.277	92.001	2642.04	4656.56	0	36.769	17.1569	6.7865
183	65785.2	35	693.447	590.548	663.542	32.462	7.273	7.837	4.652	0	1.007	4.115	5.136	3.81	4.848	17.687	0.953	3.601	0	3.092	0	7.384	0	0	12.069	3.797	76.099	8.478	0.291	3.074	0.849	1.276	540.169	877.223	5.851	53.053	-5.76759	23.0083
184	67209.4	27	1385.52	1263.49	1594.63	50.421	22.081	18.261	1.995	0	0	6.875	1.576	5.307	3.883	54.049	1.95	2.979	1.714	15.896	7.98	13.419	0	9.88	22.451	0	217.165	12.737	0	2.715	9.57	50.418	1300.1	2532.78	9.13	41.391	2.63807	10.6863
185	67356.2	42	1060.24	1151.33	1251.67	60.891	18.483	10.289	11.23	0	0	0	5.509	3.155	0.766	18.165	1.582	0	0	9.662	0.316	0	0	0	19.049	0	206.497	4.574	81.582	3.601	1.074	0	662.98	1122.38	7.457	29.407	-3.77436	27.679
186	67612.3	57	1172.24	1126.49	1157.74	38.917	12.658	4.423	3.552	0	0	0	3.162	20.534	6.544	62.035	12.463	0	0	8.893	18.643	11.669	2.415	10.608	19.288	2.92	224.15	7.524	0	19.058	22.423	18.023	994.229	1663.14	16.627	92.137	5.73292	12.4466
187	67872.9	44	1948.14	1903.87	2202.19	73.835	35.624	15.28	0.722	0	0	4.892	3.671	29.269	15.532	92.912	22.158	6.617	6.819	29.484	49.376	7.893	415.167	11.114	33.228	9.843	264.127	9.398	10.808	2.678	31.766	12.935	2180.42	4164.78	70.101	79.915	12.6091	5.29801
188	68357.3	36	1794.33	1733.78	2275.05	72.619	23.293	15.652	19.017	0	0	13.414	4.98	7.577	4.238	34.341	6.34	2.735	0.444	25.795	22.141	13.64	0.399	10.08	54.378	2.548	525.97	36.724	11.517	0	15.589	4.789	3318.39	5783.04	8.195	101.283	11.6059	9.76931
189	68558.3	49	1148.8	1254.96	1259.81	72.056	43.145	11.222	4.758	1.256	2.301	0	10.654	19.991	3.304	32.166	11.649	0.051	0	22.434	15.571	0	2.353	7.156	10.26	0	142.952	13.905	4.32	3.269	6.056	23.297	1017.04	1792.44	45.211	49.909	8.19797	20.7301
190	68598.5	84	1632.41	1783.32	1782.49	115.567	74.526	14.209	17.394	0	0	0	19.392	47.309	21.438	98.76	15.035	10.474	0.643	43.64	22.169	4.588	0	24.314	62.457	6.402	314.605	58.511	1.514	5.326	28.332	37.869	2336.82	4149.73	47.008	114.689	23.151	9.48066
191	68692.1	51	2624.35	2700.17	2957.7	108.715	71.684	18.437	3.45	0	0	105.687	1.34	10.297	8.465	38.753	0	0.011	0	12.785	4.164	0	0.315	1.282	46.636	0	212.246	15.962	1.841	1.596	0	0	1743.23	3297.41	7.092	51.747	11.6696	22.7212
192	68778.1	62	3244.99	3404.26	3765.64	153.754	57.986	31.911	17.847	1.82	0	0.325	14.852	23.535	14.849	63.276	13.264	12.047	0	43.17	27.254	40.597	12.496	18.729	54.101	0	544.287	43.956	11.244	8.852	63.996	142.722	3433.87	6257.26	24.168	95.326	16.5058	0.836929
193	69784	40	1895.71	1859.98	2239.14	90.262	22.598	13.947	0	0	0	11.849	2.022	19.635	0	21.837	4.652	9.964	3.237	7.265	18.986	0.428	0	3.776	13.57	0	208.03	16.959	2.588	4.963	7.552	6.535	1523.47	2743.03	73.236	21.039	-0.623663	18.3091
194	70365.1	82	1132.8	1081.44	1219.45	79.374	37.305	20.029	23.436	1.744	0	4.091	19.189	37.643	22.612	129.531	35.437	12.469	8.178	27.368	18.87	2.608	6.375	19.55	16.314	0	305.921	6.716	8.768	21.178	35.913	17.686	2090.48	3526.77	14.594	73.331	11.0179	16.8738
195	70945.2	38	1389.68	1347.54	1491.17	89.922	28.11	17.382	20.326	0	0	6.868	9.963	22.796	32.406	95.666	12.059	10.13	0	40.537	26.092	0	6.686	36.694	41.928	0	514.444	23.473	8.929	6.73	113.788	168.902	2497.44	4744.79	21.93	65.076	23.2253	15.5506
196	71262.3	31	1357.53	1438.62	1513.03	72.557	31.498	12.34	12.504	0.723	0	10.776	7.874	17.556	34.004	46.127	10.32	0.423	7.249	8.609	2.521	0	6.196	10.077	33.819	0	332.287	26.735	0	5.949	5.387	22.681	2037.18	3625.78	15.62	48.46	11.3807	21.597
197	71302.7	38	1735.8	2077.66	2270.81	123.191	28.612	16.921	9.216	0	0	16.93	14.565	61.396	52.184	311.337	24.546	11.139	0	43.894	12.358	4.704	2.736	28.824	87.077	1.092	620.743	40.935	18.43	8.598	36.902	272.733	3707.97	6959.49	11.119	87.116	27.701	4.06629
198	71356.3	79	3722.26	3480.69	4085.89	201.941	55.013	34.952	39.766	0	3.975	4.828	23.029	44.489	32.185	208.049	51.531	11.091	0	69.201	67.753	10.927	8.754	87.123	119.047	22.527	1044.1	45.239	7.819	17.549	236.215	1590.74	5243.58	9781.53	33.129	165.605	28.1543	-1.40567
199	73433.6	51	2673.8	2766.01	3140.39	140.944	53.827	49.959	21.16	0	0	9.836	7.645	28.469	16.923	189.784	31.616	26.05	2.54	77.607	49.56	27.039	10.198	125.648	105.95	0	693.545	56.9	10.364	8.674	292.937	463.508	4658.89	8083.28	15.084	94.355	24.2076	-0.157822
200	73950.1	42	5962.38	6245.01	6826	270.495	45.037	23.892	2.606	0	0	18.403	7.222	84.917	27.145	124.179	10.473	25.291	1.279	25.504	33.091	4.233	11.301	8.257	61.46	4.051	415.162	16.483	1.715	13.939	41.162	59.71	4469.5	8027.99	8.33	74.54	16.908	11.229
201	74733.9	33	2857.29	2737.27	3005.98	120.872	34.079	16.659	2.433	0	0	11.631	4.802	40.234	4.172	54.984	5.582	14.803	0	42.286	8.962	76.296	0	0.063	34.226	0.006	487.703	35.848	1.906	0.817	19.115	4.463	2671.51	4757.77	24.813	32.579	18.6531	-7.1869
202	74948.6	30	2035.93	2087.82	2374.17	108.014	12.306	10.693	6.024	0	0	0	5.007	62.401	17.017	175.761	19.43	15.855	1.532	49.265	36.952	22.472	14.366	15.531	74.89	8.949	424.667	28.636	9.736	28.545	47.165	36.879	3136.56	5584.07	28.496	103.999	21.7858	-2.86899
203	74971.9	30	2414.5	2696.67	2851.87	187.195	54.916	13.626	39.2	0	0	20.989	6.401	25.689	12.797	172.874	24.867	19.046	0.057	63.049	47.596	4.321	4.542	79.965	72.394	3.252	921.361	44.919	23.662	10.982	227.1	291.389	5947.58	11275.7	3.328	57.36	27.777	7.51789
204	74992.4	62	1113.88	1200.8	1315.18	50.715	13.223	0.572	11.053	0	0	10.188	21.417	22.842	15.597	99.15	20.725	3.058	1.539	27.903	43.458	6.748	11.542	8.54	63.238	4.063	290.237	15.84	3.34	8.866	6.616	42.495	1667.31	2951.57	20.331	101.976	17.0271	11.8071
205	75024.1	43	3778.42	3888.33	4213.49	190.498	43.246	12.068	0	0	0	31.741	3.09	397.979	1.161	19.741	0	2.079	0	11.91	1.042	1.533	0	3.803	0.337	0	134.81	1.993	0	4.359	3.336	3.771	1144.48	2075.95	18.11	52.12	-23.1505	16.436
206	76083	60	810.648	729.467	832.978	54.763	24.786	3.167	9.541	0	0.948	0	4.009	1.918	1.349	14.327	21.343	0	3.721	10.787	0	2.254	0	1.011	15.137	0	90.377	12.682	0	0.713	15.909	7.808	599.114	1105.38	6.654	33.035	-1.81901	29.7124
207	76426.2	63	1592.32	1467.28	1652.51	93.447	40.75	22.871	7.436	0	0	5.267	71.301	371.9	171.073	1567.21	126.351	46.213	0	62.707	48.474	106.202	22.984	58.339	77.075	10.74	789.064	32.899	63.767	37.799	34.274	243.444	2884.23	5101.95	8.631	101.833	24.9108	-9.68699
208	76563.3	75	1287.59	1376.91	1482.69	91.662	36.063	12.947	0.72	0	0	0	3.346	17.673	3.162	25.186	21.377	19.283	0.885	31.185	7.028	3.701	0.269	7.977	30.324	0	316.474	24.947	9.212	0	24.816	25.586	1431.16	2482.1	44.121	49.221	14.8633	14.9426
209	76777.4	45	2353.49	2431.26	2943.06	136.568	48.72	30.674	9.955	0	9.701	0	2.103	14.587	11.645	66.8	0.458	12.717	1.656	47.376	7.961	0.25	9.854	0	74.388	0.072	477.395	45.102	7.519	0	37.432	32.596	3295.6	6608.06	26.263	76.372	23.8552	17.4824
210	76805.4	36	2985.23	2835.86	3125.54	130.335	44.401	17.26	12.797	0	0	0	6.77	14.564	11.182	33.656	7.536	2.526	3.455	37.422	13.937	2.184	4.819	9.379	19.617	2.688	384.411	10.851	0.893	4.601	16.971	29.804	2414.57	4442.06	0.057	86.3	9.51428	16.2997
211	78062.2	80	3646.66	3522.04	3825.14	204.506	68.036	28.845	19.001	0	1.966	0	22.596	39.343	12.508	124.505	13.268	63.65	1.623	71.27	33.8	18.951	1.594	9.386	102.349	9.86	683.633	52.364	28.668	12.408	49.192	13.684	5409.5	8935.65	19.72	97.155	26.4091	-1.70523
212	78382.8	47	3350.29	3544.81	3478.75	176.7	37.666	18.782	10.503	4.026	0	3.601	17.732	28.796	7.816	79.84	14.102	27.947	0	26.302	24.643	4.374	2.369	39.205	34.428	19.526	568.381	28.124	30.805	8.736	63.801	161.336	4028.5	6867.37	14.866	65.985	21.6087	13.1221
213	78881.9	57	642.689	718.783	731.357	44.701	15.292	4.926	7.649	0	0	0	3.113	11.186	0	5.204	0	0	0	16.23	0.519	0	0.013	1.461	20.561	4.587	114.367	4.538	0	6.935	4.657	6.309	704.45	1250.67	3.238	18.476	-3.94655	16.3521
214	79030.6	48	2889.38	3058.64	3466.24	155.366	38.907	18.975	16.641	1.983	0	6.503	29.187	55.599	40.012	164.514	22.704	6.982	1.889	52.723	44.615	19.159	12.548	35.347	92.678	30.86	685.046	56.855	11.89	21.902	84.405	861.602	4274.25	8037.07	51.196	165.415	25.323	-3.29158
215	79107.8	40	2674.6	2511.01	2993.71	106.494	61.204	31.343	7.63	0.577	0	5.306	13.442	24.734	13.819	105.687	7.61	4.516	0	40.497	15.69	6.152	0	16.776	59.183	4.625	504.168	35.827	19.913	9.006	33.069	44.31	4740.51	8231.18	4.938	38.274	21.164	4.65456
216	79320.7	38	2451.32	2411.09	2914.42	109.685	35.939	11.81	23.587	0	0	17.569	21.578	36.324	18.47	129.051	5.287	12.208	0	32.967	12.364	11.77	6.09	25.514	30.916	0	390.94	40.592	15.714	9.626	12.45	30.424	2281.33	4385.78	22.234	43.149	18.1514	3.5159
217	79341.1	28	1891.89	1859.89	2272.29	59.98	40.833	25.372	4.118	0	0	15.909	4.158	17.982	9.905	118.826	4.75	5.624	1.537	17.789	11.322	14.26	2.766	1.518	48.021	4.311	327.399	20.708	6.916	19.676	10.057	11.158	2258.7	3990.95	21.993	38.597	15.4789	5.82523
218	79404.6	56	7450.01	7584.08	8300.33	336.358	89.289	35.328	0.025	0	0	24.393	20.039	31.735	14.962	116.844	0	8.025	0	34.487	8.833	4.746	8.476	7.365	38.514	5.679	435.909	21.2	2.855	7.894	62.629	25.998	4330.1	7735.22	33.464	115.514	18.6816	4.88274
219	79863.6	25	370.339	391.411	400.052	39.385	10.199	4.792	0	0	3.199	30.484	0.636	3.287	0	25.824	2.488	3.544	0	3.159	4.359	0	2.196	2.334	21.225	0	97.029	2.295	3.719	6.864	0	5.459	619.925	1159.76	0	32.643	-7.56743	24.406
220	80461.5	45	1357.2	1299.54	1593.32	92.136	33.973	25.511	14.017	5.288	0	7.478	9.262	28.31	7.327	37.878	20.284	11.309	0	33.958	15.559	21.703	1.022	7.978	40.925	0.869	334.435	32.136	8.714	5.047	14.361	39.979	2175.35	3696.67	18.895	53.623	12.2351	7.84342
221	80618.9	33	2876.85	3127.53	3446.29	154.322	34.892	10.881	18.484	0	0.35	12.699	11.839	39.205	15.611	96.144	23.651	0.347	1.213	23.755	44.135	7.58	11.846	11.761	72.058	2.575	684.031	70.777	9.955	7.089	65.599	25.569	4609.91	8534.09	19.113	40.73	26.1266	5.76772
222	80951.2	43	2778.59	2876.47	3242.59	98.398	48.939	31.607	14.556	0	0	13.508	16.743	61.398	24.833	148.109	38.313	24.39	4.012	50.51	23.803	0.569	3.512	61.581	45.254	3.367	506.184	11.92	19.911	21.482	119.008	263.091	4503.83	7784.58	32.668	56.916	24.8431	13.6316
223	81267.3	36	4097.08	4035.86	4847.56	158.408	28.585	38.513	0.118	5.656	0	25.684	13.433	4.534	2.449	786.881	5.782	0	0	21.362	3.071	88.458	2.099	5.024	35.137	19.809	2039.45	5.79	3.92	0	0	0.817	1548	3121.92	17.294	28.579	-5.38147	-10.5786
224	81438.9	40	761.427	785.412	956.273	56.621	6.18	14.273	3.092	0	0	8.085	6.973	16.304	32.392	139.784	14.003	8.695	4.186	11.047	19.382	9.616	1.962	6.294	3.302	2.076	160.83	4.417	15.614	12.747	27.06	10.789	1031.55	1762.87	9.715	41.905	-2.12773	10.4769
225	81625.8	39	2665.7	2840.46	2971.13	189.612	42.687	31.201	42.957	0.251	2.486	14.262	7.264	102.704	56.733	326.399	701.845	9.393	3.108	58.522	29.839	28.934	11.638	17.919	82.141	15.231	1121.1	37.371	19.339	19.053	63.222	98.165	6127.15	11048.8	15.882	34.49	24.6127	-7.14237
226	82347.3	38	1747.82	1811.12	2058.66	83.305	17.436	8.364	1.252	0	0	24.868	0	0	136.634	89.597	0.2	0.326	0.819	0.485	0	0	1.583	2.247	1.054	0	55.954	2.183	0	1.751	0	5.35	844.549	1607.92	5.16	23.564	-12.9215	20.8804
227	83002.8	40	1494.13	1473.55	1529.05	52.962	19.494	7.019	0	0.106	4.757	0	11.734	23.404	9.453	36.113	2.263	19.962	7.793	27.4	8.869	0	0	0	22.177	2.324	187.572	17.005	0	1.538	5.363	0	1585.11	2918.9	12.816	53.331	9.97312	19.9423
228	83435.5	31	1309.57	1136.02	1442.77	83.601	17.414	7.509	11.502	0	0	12.766	12.322	15.594	7.743	80.519	11.557	4.034	0	32.7	32.081	12.656	19.661	12.47	77.834	11.177	313.081	40.341	22.601	7.699	29.972	256.325	1978.57	3567.83	19.177	38.866	19.1641	3.47463
229	83799.1	34	1617.02	1389.12	1681.67	73.868	24.15	2.37	2.008	1.952	0	5.591	9.857	13.235	23.217	39.521	5.964	11.252	0	11.934	8.899	36.772	0	4.815	31.667	11.996	181.845	6.188	10.186	8.271	14.238	10.855	1590.96	2826.81	38.297	16.091	3.98066	9.30503
230	83993.5	46	1024.69	1098.19	1117.33	47.24	32.529	29.976	2.605	0	0	11.552	0.207	4.749	0.612	38.14	7.644	5.553	0	10.822	19.819	0.802	4.363	15.506	18.898	0	322.011	27.072	1.644	1.16	34.298	90.253	2034.56	3680.77	4.998	66.089	8.94167	24.4832
231	84409.6	40	1247.2	1330.58	1418.81	64.282	12.948	6.74	6.399	0	0	7.079	4.039	20.364	0.5	45.814	3.899	0	0	14.748	0.705	4.371	0	2.088	16.336	0.781	111.089	2.528	0	0	11.356	0	791.831	1329.4	9.28	38.352	-5.01086	13.6811
232	84548.1	31	1472.85	1428.67	1686.53	59.207	16.252	17.977	4.281	0	0	2.777	11.173	13.252	8.723	30.245	4.078	5.343	0	14.579	12.436	3.97	1.548	19.76	40.028	0	283.008	20.744	0	0.482	22.212	4.374	2480.22	4432.43	13.367	50.407	10.9166	15.0005
233	84549.2	31	918.415	974.42	989.693	40.94	22.173	3.077	11.725	0	0	0	13.666	17.287	1.04	33.19	0	1.757	0	27.77	5.214	6.703	0.929	0	16.29	0	135.037	15.719	2.732	3.72	6.919	5.915	973.621	1677.14	9.177	30.284	7.09211	14.9844
234	84779	45	1701.88	1760.06	1924.68	91.176	21.606	23.52	3.869	0.178	0.621	7.612	8.436	21.732	17.317	73.911	7.416	11.09	0	20.785	18.213	16.244	8	6.481	20.87	19.896	338.341	22.902	17.762	13.3	38.891	51.382	1789.03	3292.92	45.635	84.064	12.8521	5.64928
235	85145	37	1431.52	1436.17	1772.25	104.737	46.482	22.754	32.131	0	0	10.723	0	42.391	16.554	115.135	26.112	16.367	0	78.425	36.687	2.72	0	35.298	61.406	7.041	741.983	58.766	12.896	6.599	156.81	425.015	5587.58	9751.66	29.379	34.571	28.3014	7.12293
236	85155.9	28	1333.46	1503.7	1525.95	74.199	20.601	10.672	0	0	0	19.494	0	1.983	1.57	23.251	0	0	0	0	0.8	0.46	0	0	5.671	0	30.867	0	0	0	0	6.697	885.87	1395.56	10.855	11.799	-13.0743	23.1479
237	85364.6	30	1726.82	1814.69	2059.78	72.118	14.842	7.393	8.501	1.306	0	7.878	10.6	5.431	5.933	45.851	9.703	9.942	0	36.3	17.316	1.946	0	9.932	28.015	0.991	346.65	29.17	10.296	4.031	12.768	14.536	2993.4	5210.13	12.275	33.443	13.6617	25.2516
238	85484.2	45	2931.36	2895.62	3358.23	117.293	44.397	23.582	17.543	0	2.494	0	24.369	33.435	22.281	145.324	77.934	61.508	2.023	57.236	40.527	9.482	6.9	247.093	78.692	12.516	784.406	30.978	20.067	9.86	409.505	272.835	6516.63	12035.7	25.202	62.245	23.0595	1.04406
239	85764.9	28	295.01	291.88	380.054	23.37	22.249	11.231	2.272	0	0	0	0	6.432	14.32	31.82	22.43	7.846	0	17.251	1.077	0	0	38.771	16.693	1.222	214.909	8.231	1.568	0.701	86.693	92.256	834.117	1561.86	2.706	12.672	-1.25007	18.3528
240	85955.8	37	1559.71	1566.31	1944.46	117.811	46.277	33.939	16.206	0	0	4.652	2.704	24.723	8.438	97.19	14.474	8.969	0	56.876	35.126	0.843	15.492	34.822	120.675	39.365	585.385	21.605	5.168	1.902	118.89	15.814	5254.28	10224.2	23.013	34.75	26.0511	14.1648
241	86798.3	36	666.335	616.839	771.541	31.728	13.905	3.519	3.381	0	0	11.359	1.286	2.092	4.189	38.061	1.201	6.346	0	21.42	5.813	0	1.966	0	7.359	0	96.901	13.478	0	0	0.38	0	849.589	1445.41	9.089	24.704	-0.0711497	28.405
242	86802.7	40	7391.01	7731.64	8711.92	435.839	76.098	33.203	0	0	0	24.727	0.239	6.348	3.6	145.494	6.431	1.645	0	45.887	8.2	4.814	0	0	3.384	2.622	439.871	6.203	0	0	13.825	0	3035.48	5591.39	7.172	42.273	7.21046	1.48863
243	86869.1	41	2362.88	2376.1	2916.74	83.113	62.91	16.677	4.055	0	0	0	12.048	17.609	3.019	46.982	3.683	0	0	54.816	18.365	7.568	5.011	7.172	44.514	2.068	449.313	27.665	2.945	0	22.371	10.711	2831.26	4971.39	6.701	79.663	19.6737	10.322
244	86898.7	36	1998.02	2066.92	2200.01	55.279	23.917	6.315	0.723	1.936	0	41.45	0	31.943	0	18.901	0	0	0	1.697	0	0	0	0	3.298	0	38.16	3.121	0	0	0	5.545	814.419	1464.42	2.139	13.025	-12.1358	17.3973
245	87246.2	37	1510.35	1509.82	1675.46	86.987	17.83	12.502	10.414	0	0	5.352	5.095	19.301	17.345	51.996	4.78	11.917	0.258	18.847	20.899	5.039	0	5.962	40.546	2.989	309.084	14.792	5.646	6.751	24.519	108.387	2843.14	4890.24	26.795	45.107	13.4075	14.5665
246	87474.9	49	1986.14	1913.89	2343.47	97.436	50.488	29.88	17.93	0	0	26.533	7.892	4.362	21.038	35.422	9.097	8.914	0	28.393	25.769	8.401	0	16.514	29.454	0.871	348.236	20.318	16.81	2.675	13.944	41.703	2884.76	4769.75	17.4	65.572	10.8942	11.5731
247	87673.2	37	2899.44	3131.62	3458.95	117.291	30.84	21.585	3.96	0	0	3.091	13.086	22.443	3.254	49.808	15.644	11.822	3.66	10.697	36.243	30.413	5.881	13.555	39.444	0	405.815	52.047	8.244	4.72	14.504	5.063	3512.66	6509.08	77.823	41.854	12.34	4.36746
248	87903.1	47	2996.77	3165.97	3635.26	154.925	69.238	32.573	27.101	0	1.601	13.071	8.793	50.95	13.137	162.342	35.363	25.299	3.471	100.812	36.078	8.777	9.466	77.733	100.326	3.306	1140.73	87.619	12.286	10.081	299.214	70.934	6556.87	11582.2	36.003	89.765	29.3912	-3.18444
249	88026.4	37	1529.2	1596.96	1726.38	113.821	24.943	13.184	14.553	0	2.495	14.602	16.925	66.188	56.44	336.003	39.409	15.594	1.55	50.124	32.108	21.514	3.653	31.065	63.476	6.164	406.925	14.252	19.116	32.117	58.808	101.816	2398.43	4439.11	11.209	71.545	19.8578	-3.32871
250	88252.3	35	2371.62	2330.69	2607.93	83.308	30.499	21.001	37.905	0	0	0	14.128	13.003	9.546	74.915	11.642	20.116	0	34.811	23.99	27.49	10.175	7.553	31.495	7.169	407.298	27.445	4.097	7.824	38.828	25.537	2424.66	4242.51	47.659	103.749	12.4678	3.37763
251	88264.3	66	2585.74	2701.77	2943.94	93.187	40.616	32.729	7.63	0	0	0	5.826	80.147	20.772	51.825	17.067	5.146	1.437	67.705	21.117	1.119	0	10.503	107.899	3.236	422.618	58.171	21.913	4.903	18.742	17.807	3734.06	6789.06	47.491	93.96	30.5192	9.88455
252	88695.1	50	3541.14	3668.86	3981.82	170.499	44.519	19.964	18.447	0	0	32.142	26.854	35.011	22.446	170.8	57.473	18.344	0.975	83.379	37.757	26.399	6.498	86.669	34.983	8.061	674.518	49.844	17.102	2.767	234.631	385.031	4001.73	7064.86	26.784	109.192	21.7644	-1.41132
253	88895.8	30	1522.42	1325.12	1557.35	100.636	25.271	6.333	4.038	0	0	0	0.346	14.849	1.745	14.907	5.064	0	0.238	11.637	0	1.356	2.537	0.878	24.723	0	207.4	25.384	1.646	0	2.65	0	1031.29	2048.95	23.559	16.642	6.37737	20.7629
254	89324.7	38	1889.53	1832.6	2224.96	69.459	42.517	9.24	0	2.762	0	0	1.453	23.165	10.227	21.282	4.618	7.587	0	33.629	18.611	3.874	5.872	0	36.826	0	238.102	15.531	9.107	0	10.296	3.973	1940.82	3375.14	40.853	37.708	13.3356	19.4315
255	89540.6	37	1646.06	1740.94	2021.11	67.733	13.689	1.382	3.577	0	5.574	3.569	13.475	31.609	22.123	118.675	21.858	4.239	0	16.106	12.382	19.364	5.021	3.588	30.438	14.516	214.508	14.513	21.756	13.215	25.008	16.689	1589.05	2945.61	36.626	104.43	12.7263	4.3857
256	90034.1	24	800.869	811.021	827.698	38.093	11.255	12.788	3.724	0	0	13.205	17.43	14.943	3.358	24.927	5.841	3.204	3.276	1.054	5.801	2.351	0	7.068	5.852	6.335	68.89	5.886	0.12	0	4.206	9.567	968.291	1599.72	17.098	24.811	-9.41965	17.6662
257	91303.7	38	1922.65	1814.02	2008.05	61.038	22.405	23.034	9.717	0	0	6.84	12.999	52.355	4.775	115.588	3.899	14.714	0	37.565	23.048	3.826	13.075	17.752	77.641	14.194	486.324	33.725	6.169	4.37	41.661	54.359	3096.67	5364.22	34.362	67.77	24.3632	6.9368
258	91989	51	1983.77	2137.53	2240.52	137.697	31.912	16.255	4.354	0	0	0.469	7.71	25.727	12.289	52.902	3.194	9.809	0	37.062	32.21	18.525	0	2.473	28.304	4.365	304.269	35.997	4.926	15.055	52.128	12.351	2475.85	4306.28	0.773	93.627	13.1218	7.37053
259	92074	35	1129.9	1061.38	1294.15	60.924	26.837	5.238	12.763	2.015	0	0	9.473	35.868	14.095	123.967	12.238	3.064	0	3.84	3.57	25.507	0.009	10.261	31.814	0	164.829	8.901	8.979	0	26.718	16.811	1200.64	2078.69	7.19	102.824	7.27181	7.19085
260	92147	35	3442.06	3335.69	3708.23	163.334	54.759	26.322	24.226	0	0	26.037	32.746	341.567	138.117	1364.58	117.468	35.327	2.266	101.303	40.815	114.642	23.719	106.544	66.907	11.907	1266.48	63.073	58.934	18.219	165.716	1030.02	6637.49	11846.5	19.651	65.521	25.2489	-9.72462
261	92162.3	31	2173.43	2238.04	2426.75	69.614	25.244	15.471	25.33	0	0	21.229	43.017	41.045	30.939	250.617	26.404	23.097	0.771	64.759	41.419	23.623	4.548	18.738	52.652	3.47	666.595	23.088	15.078	21.076	68.145	290.187	3501.02	6188.59	5.999	64.253	21.2811	-3.44018
262	92909.7	45	1233.44	1359	1534.57	105.546	43.229	19.803	9.03	0	0	0	3.169	40.465	7.9	134.155	9.81	20.891	0	45.85	47.416	14.574	0	9.561	42.559	7.478	406.621	30.967	9.092	7.693	64.593	288.81	3543.41	6520.21	30.452	32.018	20.0785	0.516301
263	92996.9	38	4500.43	4589	5252.05	231.271	93.935	19.585	4.018	0	0	34.656	10.255	269.993	3.933	31.635	1.031	3.902	3.693	28.331	24.596	24.683	0	4.795	35.325	0	471.202	6.104	2.667	0	9.162	7.76	1880.27	3295.66	33.082	67.268	-13.9575	7.11697
264	93031.4	50	3197.29	3330.54	3686.9	177.22	45.484	21.391	26.762	0	0	33.751	14.158	37.411	15.831	176	31.241	14.51	0	64.369	54.23	15.547	7.663	157.1	77.527	3.697	987.872	46.628	22.487	20.237	499.065	326.104	6405.3	11146.3	36.904	137.973	23.5807	-0.258825
265	93408.1	49	1929.16	2099.38	2244.05	129.385	20.509	17.751	13.028	6.03	1.123	0	31.351	16.598	5.318	47.976	11.378	2.238	0	28.323	1.826	1.825	0	7.032	80.759	3.029	476.198	31.152	6.253	1.793	8.79	9.819	2801.05	4915.55	21.908	70.791	21.2669	16.801
266	93430.1	51	811.263	679.027	773.012	44.372	10.027	9.295	2.755	0	0	0	5.617	13.785	1.727	26.262	4.231	0	0	25.89	0.274	0.751	0	0	6.749	0	113.702	0.147	0	0	0	3.488	1031.43	1689.35	25.887	60.38	-9.30939	14.2037
267	93485.4	67	6074.16	5823.15	7036.62	245.749	46.696	58.817	5.81	1.094	0	25.977	3.533	8.256	15.495	2466.77	8.378	0.867	0	55.361	9.689	568.96	10.509	17.013	68.159	46.259	9338.87	38.64	4.244	0.621	0.263	9.569	1929.32	3806.22	11.601	85.28	-25.2769	-6.67182
268	93583.9	70	3757.31	3618.97	4309.68	155.852	48.154	14.454	14.778	0	0	19.304	19.661	86.15	27.69	183.24	71.178	17.462	6.282	69.078	22.732	29.63	13.37	17.768	81.64	12.707	565.678	35.797	22.976	16.439	29.973	42.497	2521.32	4341.46	12.249	145.448	24.2943	-5.20072
269	94196	57	1303.37	1266.57	1505.93	64.072	35.811	7.735	1.888	0	0	99.882	9.097	16.119	4.734	35.563	1.751	6.361	0	14.78	18.276	9.662	0	7.591	17.669	0	146.417	5.908	1.782	11.889	11.818	0.381	1559.96	2666.67	6.008	96.434	4.78527	12.0071
270	94637.4	48	977.086	924.282	1082.28	31.334	4.712	13.486	2.719	0	0	0	2.881	5.74	10.042	9.01	3.539	1.681	0	0.541	0	0.657	1.277	13.087	10.362	0	71.517	1.301	8.802	1.147	10.33	8.36	568.321	1055.64	12.151	20.394	-11.2118	25.9812
271	94911.9	37	8572.52	8384.09	9403.52	351.673	85.205	34.733	3.178	0	0	12.266	6.025	31.425	10.012	209.84	14.993	27.949	1.836	8.889	13.91	3.151	5.838	16.511	29.327	0.728	768.883	42.055	4.453	49.291	170.104	1180.2	6175.86	10707.5	2.782	46.947	21.4792	6.09789
272	94919.1	31	3856.73	4127.62	4718.31	140.12	56.521	19.818	2.092	0	0	14.247	1.836	3.759	8.094	827.661	5.497	0	2.13	17.815	7.399	139.886	17.195	121.122	56.686	24.939	5032.09	22.794	0	0	0	115.941	1787.07	3256.35	2.679	29.206	-14.1848	-14.7263
273	95152.2	34	312.906	319.969	390.326	8.633	4.982	0	0.364	0.038	0	3.471	0	4.467	4.77	12.2	0	0.477	0	1.454	0.836	0.258	0	0	18.298	2.83	52.459	0.711	0	0	14.021	0	338.632	619.163	5.637	22.925	-10.636	25.8818
274	95578.8	39	1144.93	1212.7	1429.32	72.825	45.099	17.479	4.198	7.971	0	0	0.488	26.168	7.087	57.458	11.93	13.156	2.334	24.579	16.409	10.159	0.432	15.444	20.983	5.746	362.966	13.443	0	0.644	64.59	64.264	1667.77	3059.81	74.559	53.552	12.1593	6.24587
275	96050.2	49	3086.3	3026.39	3303.16	136.129	56.618	31.668	49.706	0	0	1.66	14.71	69.892	48.242	252.96	51.714	10.266	0	87.036	47.736	11.441	8.391	47.46	80.911	12.889	961.611	76.041	21.125	25.705	105.449	172.925	4570.06	8135.28	14.16	111.711	27.4659	-4.12186
276	96105.2	35	1001.55	1143.54	1173.02	35.796	23.34	14.604	4.908	1.221	0	0	0	6.17	4.213	15.376	3.978	5.728	0	10.61	6.104	0	0	1.772	12.243	0.86	153.437	25.829	2.76	0	0.058	19.131	1298.49	2537.39	20.066	23.935	0.437345	29.2228
277	96106.1	69	1170.3	1192.88	1295.07	107.403	47.418	30.943	20.968	0	0.073	9.353	17.434	79.748	29.341	189.921	29.769	17.02	0	41.981	17.465	19.246	6.46	26.203	50.705	6.947	526.642	12.476	11.473	9.352	56.019	125.781	2621.26	4463.94	39.801	58.363	19.5781	-2.64677
278	96359.7	69	2369.8	2285.97	2715.59	158.286	47.954	44.947	22.661	0	0	19.219	15.248	133.163	51.839	392.912	35.316	30.834	5.646	71.027	45.515	21.441	16.576	43.394	93.113	6.056	604.046	38.795	26.906	7.091	96.815	263.399	4132.82	7448.21	46.276	82.953	24.8228	-7.1739
279	96396.1	73	1452.03	1598.21	1793.55	81.822	19.753	17.781	14.966	3.964	0	0	8.965	21.319	0	61.406	1.922	8.808	0	33.409	7.836	4.659	5.414	13.329	40.761	0.365	388.333	23.78	0	15.07	13.679	6.643	1391.34	2459.33	28.428	133.637	18.4265	13.1041
280	97146.7	34	834.382	751.612	847.831	28.13	11.593	2.207	10.037	0	0	5.558	4.175	7.686	7.456	46.491	3.834	0	0	5.943	9.555	1.095	3.321	5.253	10.97	4.788	141.706	16.207	0.214	2.078	25.651	6.876	816.153	1358.39	8.03	45.834	-0.383678	19.8913
281	97361.7	55	3523.36	3701.39	4403.88	239.948	61.292	39.271	12.082	2.792	0	0	32.123	122.516	63.154	361.975	41.671	22.938	0.976	65.134	26.182	22.405	13.644	77.045	97.38	11.257	874.746	34.611	20.007	21.671	69.302	358.247	4505.2	7712.02	13.326	131.546	24.7646	-7.18379
282	97510.5	45	4218.96	4164.77	4823.38	168.847	46.29	19.221	8.234	0	0	10.353	5.167	33.338	12.871	123.405	13.475	0.653	5.899	129.541	6.862	0.985	3.001	8.592	110.776	3.87	1034.3	91.112	3.134	6.829	10.799	15.301	5995.49	10838.1	21.629	102.41	31.2471	6.51538
283	97529.5	28	1393.49	1441.5	1457.08	82.567	23.632	11.435	3.621	0	0	0	1.156	31.209	5.433	28.367	4.749	6.749	0	12.058	12.483	12.554	2.055	3.253	60.317	0	330.874	12.23	5.318	1.406	20.173	7.138	1989.21	3580.49	25.543	59.227	8.47112	10.6789
284	97651.6	46	1291.12	1220	1379.22	45.227	20.915	8.543	4.357	5.299	1.112	0	7.124	15.602	3.915	38.729	8.143	6.37	0	10.779	5.849	4.674	2.115	0.011	32.486	2.778	201.115	15.202	3.614	0	26.588	6.483	1172.44	2021.61	12.117	54.734	8.77752	14.0249
285	97708.9	38	3111.39	3080.05	3394.1	151.054	55.28	56.523	0	3.617	0	38.825	10.982	5.486	21.681	22.911	2.826	0	0	8.937	13.538	0	63.855	1.303	19.152	0	99.944	4.778	2.881	4.251	12.602	22.991	1288.99	2320.92	5.095	73.499	-3.43106	26.6847
286	97766.3	73	1558.48	1757.72	1930.04	94.43	49.069	14.306	15.841	0	0	0.313	10.178	76.58	36.379	155.87	18.901	4.614	8.294	36.727	4.905	4.721	6.213	6.838	60.344	7.914	485.511	34.192	4.62	17.621	29.944	71.152	4557.86	8061.68	23.847	95.522	23.856	6.09664
287	98068.6	45	1037.59	1101.52	1028.3	39.916	27.794	14.554	2.831	2.611	0	8.582	6.979	17.459	4.669	36.554	2.497	2.416	3.77	22.663	2.736	9.243	0	0.194	32.794	4.533	179.833	6.379	9.276	12.308	26.561	22.377	961.165	1650.91	12.13	44.777	5.58404	11.7442
288	98282	48	3151.75	3385.54	3973.54	150.204	46.421	23.201	21.479	0	0	13.117	10.813	54.481	17.612	187.345	20.009	16.594	0	42.141	31.505	37.613	14.891	28.602	72.927	14.433	791.186	46.944	23.048	13.555	54.696	61.326	5871.05	10199.6	29.157	49.561	22.269	-4.63501
289	98365.1	45	1789.21	1766.48	1800.08	99.938	25.626	22.181	29.211	0	0	10.361	3.136	22.899	19.706	92.247	20.945	5.343	1.166	45.576	23.578	6.217	0.948	15.146	60.365	0	443.83	47.322	2.434	1.99	48.847	87.365	2951.09	5176.04	12.713	63.992	24.4852	9.42022
290	98443.9	46	1600.5	1593.35	1905.85	84.21	25.651	3.687	8.302	0	0	0	7.646	41.35	14.335	40.649	16.266	7.666	0	21.225	12.13	77.268	6.663	0.393	74.861	5.353	321.647	22.598	0	12.693	26.449	27.259	2222.56	3848.75	60.926	59.14	14.0309	0.383573
291	98664.5	61	3551.16	3713.23	3845.26	118.09	56.108	28.148	1.346	0	0	35.617	1.062	615.397	13.6	17.967	0	29.458	0	10.477	8.407	22.885	7.677	7.994	19.227	15.895	182.127	6.915	2.432	0.035	9.284	7.126	1463.69	2740.79	8.774	45.36	-18.5328	6.65762
292	98951.2	48	1115.22	1215.95	1403.86	87.895	24.764	19.238	9.918	0	0	5.193	0.871	17.684	4.562	26.86	7.493	7.73	0	21.024	13.73	0	2.691	7.368	22.227	11.292	204.915	18.381	0	1.255	5.037	21.65	1535	2898.96	22.444	79.229	9.39214	20.9418
293	99142.1	37	1533.52	1430.9	1756.26	89.506	48.298	13.357	6.862	0.855	0	0	5.897	10.196	10.303	82.627	6.364	5.954	0	22.33	17.9	0	0	48.879	52.686	1.861	388.482	46.123	11.047	8.737	82.522	276.281	3161.67	5634.25	8.345	39.086	19.7581	20.3326
294	99906.4	31	2715.57	2812.93	3300.85	105.945	34.618	17.453	8.72	0	0	3.498	1.93	20.776	4.683	69.892	6.404	7.374	0	39.769	34.273	3.499	3.071	0	72.006	0	581.883	24.548	8.246	4.91	47.358	32.275	5167.5	9264.93	16.466	32.846	21.6834	12.917
295	100035	29	563.299	570.572	630.539	38.657	18.896	0	1.878	3.021	2.958	10.244	0.538	5.562	0	12.857	0	0	0	25.454	0	1.23	0	0	11.855	0	86.877	10.106	0	0	21.331	0	474.55	854.958	2.615	16.983	0.0776586	30.7494
296	100372	38	713.529	638.77	851.321	29.71	16.084	1.125	0	7.751	0	2.241	0	3.336	1.671	8.661	0.191	0	0	11.699	0.174	0	0	0.01	10.084	0	68.339	12.719	0	4.317	0	7.071	511.791	946.755	11.957	47.293	-6.15065	29.5775
297	100674	47	2308.87	2595.53	2701.82	133.129	47.729	20.183	9.985	0	0	10.585	16.639	35.803	26.761	101.395	21.658	6.814	0	20.351	29.393	7.506	3.472	6.064	57.722	15.822	507.709	30.343	11.928	4.484	53.827	46.678	4145.92	7506.42	21.916	71.477	16.8954	9.8911
298	102022	46	1488.47	1511.46	1594.12	75.788	35.574	19.046	20.071	0	0	48.408	11.998	80.226	39.276	273.451	46.852	21.707	0	57.814	51.315	32.32	34.572	55.773	49.818	23.337	559.359	55.698	31.352	40.727	66.732	70.723	2982.91	5248.38	11.842	98.825	22.2514	-4.78932
299	102335	57	1022.2	926.262	1121.72	50.258	36.267	9.74	1.257	3.212	0	0	1.734	10.715	0.243	36.07	0	2.136	1.167	20.579	6.774	0.689	0	5.806	18.76	1.469	128.894	19.778	0	0	6.953	1.4	1103.81	2040.89	18.403	39.493	7.61365	22.3408
300	102428	58	2237.01	2170.34	2494.17	100.676	45.305	25.801	13.1	0	0	9.5	12.777	14.997	3.65	49.28	8.588	9.03	0	59.401	34.165	22.826	7.286	0.415	41.383	14.693	477.45	63.6	12.441	6.882	20.797	97.983	2244.52	3980.39	38.675	97.704	16.8498	2.29609
301	102827	58	2733.35	2763.82	2945.31	178.943	59.159	25.374	28.073	0	0	0.609	24.423	21.898	20.172	119.212	33.512	12.919	0.392	68.16	76.378	12.416	21.244	225.312	120.433	20.288	874.829	39.242	21.62	11.353	407.031	346.287	5567.95	10063.2	23.322	78.944	23.9157	1.9897
302	103053	75	2455.95	2516.72	2802.29	138.723	67.959	26.869	30.131	0	0	53.471	33.908	109.787	41.997	415.184	64.465	35.976	1.606	68.188	59.284	32.924	25.058	138.413	61.168	21.678	807.795	20.439	20.479	30.597	176.82	367.492	4198.81	7933.31	41.268	122.353	23.3181	-6.95611
303	103686	37	2190.64	2209.26	2499.1	135.428	39.914	35.717	11.796	0	0	18.421	2.38	50.444	20.957	85.812	23.606	6.31	1.734	35.981	11.832	5.92	3.682	17.919	46.775	2.263	592.939	53.514	20.476	2.455	32.967	53.743	4194.42	7255.6	28.563	58.023	23.5158	7.79883
304	104186	33	1941.76	2031.78	2296.82	121.39	26.952	10.337	22.545	0	0	20.992	10.569	38.601	15.582	140.267	15.77	7.896	6.427	53.126	20.465	3.546	4.724	24.038	38.006	5.008	377.021	33.629	16.828	9.634	40.176	158.971	2798.33	5380.55	20.387	28.647	23.5599	13.2062
305	104240	64	2045.74	1839.83	2184.83	80.932	31.429	17.136	10.677	0	0	0	0.09	10.113	6.878	33.287	8.55	8.509	4.103	22.122	10.581	40.468	6.735	12.261	26.718	0	252.04	10.699	0	4.238	13.551	6.443	1793.88	3258.96	48.914	44.146	8.83232	5.83886
306	105726	43	1395.45	1286.18	1587.91	99.603	25.012	34.966	27.967	0	0	2.674	3.175	27.167	34.675	75.196	20.734	16.049	0	33.379	8.263	4.158	3.678	4.1	28.086	1.971	260.589	9.536	15.583	9.651	25.385	22.77	1691.05	3337.73	46.86	49.32	14.762	12.3154
307	106037	41	439.071	428.512	537.026	16.226	10.131	3.399	0.769	0	0	5.039	5.656	4.927	14.172	26.807	10.631	2.318	0	28.102	1.574	11.78	0	9.67	23.389	0	198.343	14.418	10.104	0.078	19.884	9.669	1315.08	2360.13	10.324	41.01	2.95699	12.3602
308	106582	51	2084.72	2230.69	2489.26	64.309	28.981	20.332	0	0	0	26.355	2.57	0.689	3.171	485.111	8.439	2.018	0	27.222	3.898	5.987	7.849	1.833	10.042	4.546	288.428	1.448	0	0	3.86	0	830.178	1497.48	81.605	79.063	4.16458	2.65139
309	106702	64	1163.36	1224.59	1273.47	68.366	23.661	20.176	1.945	0	0	21.863	2.022	0	11.814	35.063	18.012	20.723	0	30.518	31.018	4.589	3.194	0	59.915	0.105	229.585	19.314	8.309	2.241	4.475	8.396	872.947	1655.86	32.939	57.331	11.7302	27.2366
310	107326	45	2607.1	2499.15	3038.25	141.406	66.677	44.745	11.812	4.24	0	0	18.576	46.487	33.768	147.726	8.176	11.38	1.277	47.521	26.555	7.025	11.281	5.963	60.138	17.68	413.585	33.086	0.233	37.278	42.274	33.269	5172.29	9143.9	15.134	55.063	23.6301	6.2497
311	107393	40	1614.83	1596.32	1673.11	88.306	15.07	29.592	13.566	0	0	0	12.56	22.112	14.69	83.259	21.765	11.95	0	44.038	5.481	13.217	9.497	4.577	64.365	23.71	391.542	14.705	5.651	0.697	24.069	270.729	2328.1	4646.41	25.387	75.813	16.6075	6.32191
312	107849	29	581.749	559.456	630.545	27.038	2.453	9.814	14.672	0	0	9.567	11.844	19.603	1.953	72.655	11.849	1.452	3.186	29.88	16.029	4.622	1.798	7.399	44.693	0.992	300.236	24.677	2.203	5.335	25.737	16.653	2406.39	4117.75	6.828	50.059	17.9347	13.3003
313	108125	46	2582.48	2673.85	2972.94	144.216	57.587	32.549	56.695	1.852	0	0	2.253	16.584	14.055	118.224	21.166	5.051	6.163	55.859	36.882	6.135	0	74	81.983	9.036	1105.84	80.604	13.233	13.331	300.743	320.625	4133.86	7323.59	49.879	62.025	27.9869	7.68118
314	108235	42	4039.32	3892.65	4499.02	116.269	41.453	22.053	0.392	0	3.438	17.906	0	37.699	0.081	13.053	0.734	0	0	18.442	2.102	0	0	7.058	14.794	0	100.501	6.801	2.519	0.428	26.894	45.933	1470.72	2585.46	5.988	30.499	-7.94021	14.0628
315	108752	59	953.631	801.659	992.021	46.514	31.823	5.797	5.091	0	0	8.594	7.532	16.171	1.578	39.644	9.94	6.375	1.604	27.323	6.751	1.02	1.716	12.3	37.85	0.677	249.147	5.508	9.063	0	6.872	34.809	1007.74	1884.33	27.431	56.637	9.5324	18.5454
316	109427	34	1384.72	1270.04	1520.88	55.475	28.68	23.452	0.388	0	0	14.575	6.444	19.71	0	42.413	11.986	3.749	0	6.81	5.685	4.39	0.513	0.826	18.85	7.929	229.616	15.071	9.152	1.223	10.723	8.864	1935.75	3468.48	47.512	42.875	6.38848	14.2431
317	109560	28	981.093	983.236	1236.9	53.625	13.182	6.229	4.266	0	0	0	0	4.699	0	12.418	0	14.444	0	0	9.439	16.8	0	0	6.707	0	73.046	5.896	1.863	0	4.619	6.471	605.25	1173.58	22.618	32.608	-4.44771	10.1117
318	109705	42	102.778	122.887	89.04	9.839	11.58	0	1.336	0	0	4.752	16.88	73.246	44.712	277.782	44.306	2.513	2.596	13.455	10.411	20.274	0	5.878	6.016	0	113.191	17.48	3.765	4.282	7.884	65.89	680.556	1143.82	15.107	15.467	6.20516	6.54453
319	110240	32	3092.02	3117.58	3690.42	105.541	23.529	12.858	7.287	0	0	0	7.925	22.821	3.057	51.19	3.267	0	0	17.216	0	4.883	7.321	4.558	57.961	0	477.413	21.917	0	0	0.388	0	2935.75	5073.58	44.544	46.616	16.9545	13.1909
320	110472	38	2173.39	2110.56	2290.28	73.649	38.305	11.354	4.244	0	0	2.238	1.871	3.764	3.262	17.048	1.891	3.9	0	4.556	7.563	1.924	0	8.181	18.173	4.206	187.822	7.466	0	0.449	13.377	12.737	1353.99	2442.34	55.093	81.11	-2.2282	26.3315
321	110546	50	1300.96	1351.6	1513.29	45.884	27.258	9.344	3.493	1.9	0.813	0	0	2.208	0	22.092	0	0	0	19.946	2.02	1.875	0	0	21.316	0	254.258	27.041	1.078	0	14.359	0	1217.81	1956.38	18.704	38.741	3.53776	28.9375
322	110898	38	1774.54	1882.46	1902.9	111.31	27.285	27.611	5.414	0	0	5.807	5.247	16.914	6.002	58.74	5.561	0	0	28.973	6.937	3.636	2.044	25.413	75.179	10.024	498.275	60.947	8.684	0.45	85.099	17.748	3008.02	5672.45	27.921	59.088	22.3251	12.0007
323	111305	38	231.919	226.556	282.825	17.731	19.403	10.781	12.426	0	0	12.845	7.915	12.438	0	81.853	0	17.12	0	31.868	7.618	2.075	0	4.221	25.832	5.014	242.398	5.108	4.303	5.433	33.951	19.471	1191.98	2386.57	6.93	15.873	11.2401	17.5418
324	111594	38	2958.27	2784.1	3252.89	163.258	45.469	36.119	26.954	0	1.431	5.104	15.407	92.485	38.206	243.484	24.426	35.609	4.226	74.933	31.242	17.951	12.097	27.677	60.268	3.414	694.854	75.232	14.795	25.048	113.533	176.486	5244.82	9612.89	25.956	64.255	25.7205	-4.53256
325	111596	27	930.119	986.165	1098.65	33.503	13.979	16.948	5.518	2.357	0	14.489	13.588	7.717	24.175	9.066	6.013	1.999	0	7.368	1.494	0	6.004	0	16.149	0	114.912	6.627	5.011	0.159	37.638	2.08	1116.4	2109.39	52.651	68.183	-6.49516	18.1959
326	112055	38	1431.23	1585.65	1564.33	73.502	20.175	10.295	14.884	0	0	6.751	11.59	19.941	3.974	64.048	4.469	2.003	0	28.15	11.787	3.806	16.956	5.41	20.681	0	185.809	41.965	4.143	0	12.628	25.929	2043.73	3715.32	9.144	64.911	16.5706	13.9161
327	112171	37	1808.21	1832.71	1932.36	116.911	26.359	7.204	15.859	0.842	0	4.937	8.308	29.681	13.586	57.545	3.983	1.577	0	48.672	5.487	0.769	1.629	3.306	56.425	0	292.37	36.274	0	0	31.992	29.297	1935.15	3572.79	8.799	20.984	21.9891	17.4945
328	112414	44	2070.93	2076.21	2320.74	93.061	25.612	13.468	5.115	2.111	0	5.836	6.451	15.745	0	30.031	2.246	0.914	1.869	30.178	18.825	13.324	1.563	1.202	57.63	0	282.198	42.869	10.572	8.909	7.584	53.271	2088.47	3712.7	0.394	79.054	19.4497	9.90343
329	113924	36	1977.83	1953.28	2212.05	88.312	34.111	18.561	37.291	0	0	6.746	21.591	47.013	13.72	162.175	14.086	9.546	0.4	48.799	21.853	16.879	1.661	24.33	48.067	16.854	577.762	22.944	19.895	17.899	41.933	172.245	2619.72	4922.13	13.605	21.478	20.0423	-0.647805
330	113945	78	1294.01	1568.1	1633.77	76.104	45.465	14.388	20.127	0	0	7.253	13.905	24.955	17.002	107.568	12.223	2.425	0	30.13	15.63	2.134	6.948	16.217	16.292	6.974	299.106	25.067	6.196	12.682	9.598	64.618	2193.26	3802.24	41.722	107.004	13.2889	17.0536
331	114170	35	710.045	699.352	849.082	22.7	26.868	3.475	0	0	1.073	11.252	8.396	11.983	0	43.789	10.634	0	0	7.535	5.829	6.289	0	1.08	20.662	1.398	131.207	6.821	0	0	10.382	5.586	762.634	1252.02	25.745	36.444	-0.893414	13.1522
332	115580	36	1489.19	1407.76	1708.13	94.624	12.727	19.76	9.677	0.072	0	11.931	8.474	10.1	4.91	41.279	0	7.765	0	17.545	11.79	0	0	2.498	63.648	0.846	332.782	20.613	1.159	0	48.475	3.872	1889.52	3279.39	19.629	54.246	14.2082	23.2981
333	115776	33	2116.46	2314.66	2419.62	93.55	18.832	9.1	3.724	0	0	0	8.555	15.702	7.013	53.219	21.154	10.922	0	21.901	5.785	10.939	4.896	9.746	27.587	8.523	161.129	7.252	2.386	0	19.194	15.128	1103.92	2119.31	34.707	50.562	5.56803	11.3914
334	116095	66	549.05	511.362	528.474	30.152	11.806	3.761	2.769	0	0	10.404	5.572	0	0	11.9	13.681	1.58	0	7.907	3.002	2.231	0	0	18.5	1.429	123.37	0	11.074	0	26.913	10.943	622.199	1005.3	15.546	11.873	-8.0554	26.1779
335	116279	50	4975.69	4710.05	5315.94	165.836	74.317	32.171	1.705	0	0	42.595	6.493	1338.43	2.236	15.033	0	11.569	0	7.06	9.673	4.634	2.639	0	9.237	4.471	261.472	7.685	2.42	8.055	0	0	975.325	1877.77	2.165	48.147	-16.9879	10.0335
336	116346	45	3604.24	3594.31	3974.06	214.754	45.727	33.627	56.995	0	2.651	19.721	28.536	41.714	23.936	253.548	22.726	27.15	3.246	83.098	26.15	21.869	8.359	62.327	134.628	10.033	1357.92	94.596	32.422	14.89	221.876	438.838	5788.59	10524.6	36.67	89.487	28.9422	-4.4051
337	116368	43	3399.26	3509.15	3700.09	171.761	34.153	28.603	18.182	0	0	15.014	15.66	41.624	11.056	169.283	19.78	23.124	0.98	84.58	25.185	12.434	0	46.065	59.42	12.769	716.594	37.863	8.138	27.376	106.863	111.181	5253.38	9482.56	31.782	73.835	22.8865	0.073267
338	116538	39	832.541	713.497	962.815	63.116	20.03	18.285	0	0	0	0	7.359	17.482	10.379	21.018	5.098	3.591	1.826	19.366	6.931	5.801	0	0	40.971	12.651	175.728	8.438	4.359	0.379	37.175	10	1341.89	2528.73	54.01	40.958	5.71292	16.2806
339	117114	28	1019.49	1096.99	1302.29	59.414	18.32	12.457	18.627	0	0	24.316	13.275	16.573	5.231	87.091	2.083	15.153	0.043	38.174	13.381	4.59	6.375	20.685	37.315	8.765	565.765	27.443	4.091	13.626	50.331	85.42	2981.09	5208.32	13.345	45.237	19.1706	5.87536
340	117492	30	1916.2	1874.46	2064.66	85.855	42.734	12.558	0	1.391	0	26.229	2.749	18.735	0	443.226	0	0	0.996	18.903	4.813	84.416	0	6.392	0	2.669	167.309	3.514	0	1.929	0.398	0	1431.52	2508.41	20.409	43.342	-3.7465	1.88218
341	117550	67	5004.5	5050.9	5705.64	224.713	53.39	16.323	17.401	0	0	1.43	6.805	42.898	21.687	124.519	12.906	17.268	5.848	58.426	31.806	21.683	17.107	49.133	84.958	8.081	903.658	55.359	3.656	12.899	115.134	93.105	4699.01	8356.53	63.943	120.052	26.0676	-2.1006
342	117703	41	1420.17	1259.57	1583.99	64.523	31.77	8.82	4.715	0	0	0	9.283	9.305	6.978	41.754	6.534	16.829	1.857	18.193	18.544	22.388	4.575	11.933	25.621	4.54	295.163	23.152	19.968	0	10.821	20.026	1575.64	2628.88	31.009	43.173	10.7989	7.10989
343	117858	65	2563.8	2380.54	2700.26	156.399	48.19	58.114	21.173	0	6.075	14.442	21.075	59.684	22.358	147.825	35.645	6.578	9.658	72.778	38.445	2.322	2.198	95.113	110.005	6.28	666.13	45.823	20.999	12.666	182.371	436.454	5545.68	9533.18	29.986	70.247	30.1634	5.7896
344	118513	34	1577	1540.03	1869.11	100.483	27.56	19.619	8.339	2.027	0	10.885	0	16.249	8.165	93.318	11.854	43.257	2.737	31.603	19.172	10.799	0.895	33.68	26.506	0.399	423.806	40.358	4.8	15.236	137.63	1000.21	4227.56	7990.04	14.691	14.569	18.063	5.17605
345	118614	81	3803.45	3504.57	4134.98	160.994	54.736	31.234	4.614	1.146	0	14.327	15.227	44.977	15.861	103.663	23.128	10.966	0	65.284	7.142	0	4.86	6.291	99.299	4.007	811.098	68.584	7.045	15.197	17.738	13.3	5155.21	9295.17	59.825	96.535	30.3711	8.89802
346	119279	34	2344.33	2176.67	2374.42	94.968	29.023	15.853	7.628	0	0	0.057	20.805	64.499	28.329	278.931	34.99	0.308	0	56.031	33.923	16.397	7.65	24.87	37.044	6.761	560.302	22.551	23.215	20.692	71.329	225.777	4872.94	9367.71	25.539	42.066	21.0703	-3.41815
347	119655	34	1146.24	1186.63	1366.94	49.626	12.843	12.858	9.73	3.157	0	7.888	5.069	6.182	15.834	58.027	1.567	5.876	5.62	7.307	7.908	12.851	0	18.422	18.281	2.347	307.12	11.104	4.396	0	13.733	104.464	1312.43	2315.45	13.234	38.756	2.75771	10.557
348	119830	34	1429.58	1372.14	1571.74	48.371	15.859	8.034	7.803	0	0	6.47	0	7.963	6.583	93.658	6.359	10.981	0	58.715	47.021	0	0	10.91	62.764	7.531	483.159	36.835	9.579	0.455	32.563	4.829	2749.23	4981.89	0	0	27.5402	13.4363
349	120251	30	2179.18	2154.72	2528.83	79.036	39.179	11.157	4.377	0	4.72	27.135	2.714	0	4.988	483.073	2.883	0	0	16.738	6.404	6.842	1.4	0	6.559	0	455.393	0	0.073	0	0	4.109	1195.76	2123.02	66.64	36.907	3.37464	2.63782
350	120292	27	985.192	982.612	994.157	32.406	10.279	21.197	0	2.129	0	0.787	1.024	11.537	0	10.224	5.158	0	0.568	5.806	1.316	7.555	2.551	3.263	13.632	1.785	107.844	7.018	0	0	4.56	4.108	587.492	1069.8	11.14	49.769	-4.05473	12.9992
351	120928	30	1665.82	1764.35	1861.51	66.058	10.31	13.663	3.99	0	1.598	0	17.352	19.132	9.899	62.986	19.6	7.256	2.172	30.824	23.22	5.904	0	4.997	57.209	0	275.22	29.975	8.575	0.961	46.72	26.626	2830.49	4981.6	20.337	58.64	18.3563	12.9085
352	121263	33	2786.23	3097.88	3313.35	115.536	34.63	21.389	13.644	0	0	1.503	30.206	42.84	17.445	181.931	12.731	10.059	2.505	83.723	42.567	22.582	6.1	18.545	99.913	7.014	707.433	58.39	17.389	9.727	69.733	35.859	5799.69	10588	12.054	74.357	25.9595	-3.57206
353	121515	35	2282.15	2315.12	2623.54	119.554	25.192	13.631	9.295	0	0	12.07	11.827	24.496	24.123	100.968	11.472	4.28	0	25.311	14.556	3.758	4.429	13.222	53.532	0	289.168	14.949	4.22	9.585	25.306	66.694	2752.12	4653.43	12.689	48.174	16.9312	12.1482
354	121930	27	204.761	185.387	152.408	24.742	6.265	13.815	1.827	0	0	0	2.888	18.751	0.86	11.711	6.625	4.696	0	14.173	9.511	0	1.193	38.238	10.041	1.214	124.912	15.677	0	7.225	59.128	23.997	755.759	1281.55	43.542	33.583	-2.29016	17.66
355	121943	73	2911.69	3157.4	3178.68	198.575	60.641	37.69	31.119	0.364	0	17.238	20.326	39.173	33.282	168.319	41.892	31.796	2.682	51.461	55.811	14.339	19.815	195.015	65.188	9.565	779.462	46.253	41.625	16.24	342.439	303.114	5027.02	8972.51	17.384	54.499	22.877	-0.472464
356	121957	32	1823.94	1771.69	1874.98	87.55	38.079	15.526	13.048	0	0	0	12.751	13.618	5.234	48.672	4.649	0	0	15.761	9.575	1.122	0	8.925	23.295	0	212.614	14.16	2.69	1.01	16.256	47.468	2162.55	3984.13	10.384	24.115	7.95579	20.3712
357	122399	31	1938.54	2091.93	2418.22	104.507	21.27	14.438	0.912	0	0	17.979	2.5	3.477	6.013	11.89	1.126	0.609	0	1.465	2.209	0	1.856	0	7.96	0	50.932	2.018	4.744	0	0	3.468	1277.69	2451.36	4.673	31.496	-11.3674	25.4294
358	123444	52	2530.61	2621.64	2954.78	138.196	35.463	13.739	11.272	0	1.996	17.212	20.63	64.968	34.017	135.885	13.749	21.809	0	49.535	26.228	10.607	21.845	7.869	43.554	0.874	687.86	21.727	12.521	29.015	42.049	31.226	3308.07	5436.81	35.419	82.967	20.818	-0.462589
359	124068	37	1884.79	1618.26	1784.67	93.185	13.316	8.76	16.209	0	0	17.827	8.093	14.471	3.71	66.393	26.101	12.93	6.736	28.91	19.819	2.716	2.454	68.819	30.079	9.789	464.047	31.137	8.101	0.621	115.915	471.44	3955.7	7144.44	22.966	41.409	15.9564	16.1679
360	124453	29	1822.69	1971.19	1957.92	55.215	21.867	24.586	11.067	0	3.773	5.013	0.46	15.677	15.499	56	11.855	0	3.146	24.091	16.906	3.095	4.543	7.46	21.069	0	241.703	3.819	0	4.049	26.788	44.332	1913.78	3742.06	10.338	25.216	4.23987	13.2085
361	124837	36	1647.62	1579.63	1910.11	89.401	28.91	12.251	11.438	0	0.561	2.17	3.072	7.652	10.651	46.935	2.566	9.968	5.884	14.306	4.793	7.644	0	7.828	44.235	0	207.131	14.963	0	0.193	19.783	11.164	1596.61	2970.81	70.349	46.506	10.2422	13.0444
362	125091	76	1570.97	1667.49	1925.28	110.102	49.443	20.983	0	0	0	9.724	0.003	20.319	13.925	44.789	6.046	0.346	0.723	40.534	13.61	0	9.069	3.836	24.797	0.701	270.917	30.267	0	7.45	50.315	0.31	1531.62	2730.89	14.292	41.305	16.0206	19.9698
363	125359	46	649.776	556.279	784.204	36.621	11.882	15.116	1.182	0	0.16	28.868	4.443	8.232	12.74	0	30.726	0	0.885	8.66	3.732	0.402	0	0	12.144	0	41.999	0	0	0	0.813	0	830.666	1398.09	66.719	46.831	-10.9454	27.4764
364	125561	53	899.18	881.295	1000.71	68.323	16.526	12.979	15.84	5.825	0	2.064	1.184	6.281	7.043	56.866	5.527	6.89	0	12.597	8.01	0	3.861	6.561	13.126	5.021	151.814	14.843	0	1.855	3.35	4.449	927.673	1617.71	17.136	50.381	-0.897798	19.9417
365	125738	36	969.195	1015.72	1036.39	26.485	15.967	6.376	3.922	4.915	0	1.366	0	6.953	0	12.242	6.97	0.75	2.712	7.239	21.267	0	0.896	0	14.238	0	136.613	6.601	6.829	5.093	4.079	4.995	1324.17	2476.57	2.837	21.712	-5.84939	18.9118
366	126349	40	1265.61	1202.72	1496.5	71.098	27.275	12.454	7.624	0	0	10.164	8.711	25.533	31.05	116.842	34.635	16.826	0	16.334	33.967	29.545	12.862	28.481	42.961	3.402	288.7	19.279	18.208	38.412	43.299	23.224	1886.63	3432.67	18.826	48.088	13.2852	3.57169
367	126547	58	1101.15	1033.58	1225.19	74.875	33.772	9.32	4.046	0	0	5.839	13.594	22.926	7.697	92.721	12.169	12.078	0	9.978	22.35	8.929	8.003	0	22.351	0	171.279	2.44	14.067	0	0.871	64.755	1459.55	2690.65	21.721	37.349	5.325	12.1232
368	126979	45	4471.33	4289.04	5220.37	229.291	41.576	24.759	4.885	0	0	19.337	5.295	65.603	12.932	103.538	0.227	19.94	1.845	39.35	22.161	7.463	3.432	13.848	41.146	4.359	270.693	11.596	13.107	0	13.258	19.968	2558.72	4841.28	32.758	102.175	15.4355	8.76035
369	126992	79	2376.45	2332.93	2566.16	132.893	55.936	50.218	29.972	0	0	24.541	15.28	54.024	30.37	303.351	39.278	38.157	0	87.684	40.213	18.691	5.361	83.856	88.713	1.222	1060.61	87.056	10.008	10.201	141.519	221.129	4446.42	8109.79	25.689	78.353	27.7267	-4.50128
370	127393	48	2383.68	2382.3	2409.19	168.438	53.278	25.126	14.903	0	0	2.943	26.384	53.843	6.77	124.081	17.631	5.689	3.342	39.423	20.939	18.637	5.444	34.597	64.969	0	532.909	28.923	2.866	6.549	36.073	39.314	3955.52	6948.05	43.627	33.773	19.8389	-0.378422
371	127398	50	3558.9	3913.89	4524.78	192.026	44.843	23.551	2.113	0	0	0	0.87	4.535	0	662.897	0	3.798	0	15.85	9.518	6.158	0	4.77	20.049	0	372.457	15.212	0	0	3.527	8.785	1687.99	2881.09	21.397	21.855	12.113	-3.33635
372	128035	34	1384.46	1435.7	1484.16	38.85	10.353	11.613	18.564	0	0	4.871	7.169	19.105	18.618	81.433	4.429	11.85	1.991	36.228	5.093	6.5	0.157	7.068	25.867	3.709	281.884	11.217	12.628	2.12	24.515	11.581	1876.63	3280.86	6.97	64.715	11.867	5.63913
373	128567	36	2186.5	2163.09	2581.06	95.877	20.942	17.579	12.68	0	1.454	0	21.097	49.098	19.42	150.075	17.048	4.381	0.176	57.536	24.191	8.834	5.944	14.192	59.895	12.192	550.083	34.938	8.564	6.474	31.271	34.457	3359.44	6007.38	25.408	81.723	24.5246	-0.983057
374	129221	41	1672.53	1646.34	1803.02	105.631	26.37	4.827	16.077	0	0	4.399	3.835	9.061	0	16.419	0	1.75	0	16.257	2.537	0	1.227	0	22.751	0	226.497	16.607	2.971	0	0	3.46	1500.52	2718.35	33.606	37.704	7.5675	24.739
375	129259	32	1167.7	1457.68	1454.38	102.657	25.798	14.464	5.821	0	0	0	3.962	13.39	18.033	39.668	9.655	10.651	0	36.214	8.353	7.603	9.507	2.046	26.301	0	130.158	10.287	0	0	26.806	40.596	1901.78	3564.71	13.44	41.548	11.3023	14.0484
376	129917	30	1343.59	1285.86	1476.48	77.128	29.167	8.703	8.775	1.567	0	11.857	14.207	15.182	6.621	60.997	15.866	2.235	1.3	42.023	19.286	7.861	5.158	20.136	99.361	1.532	274.555	27.383	9.778	5.567	10.964	18.703	2267.36	4304.73	21.599	25.87	20.745	10.925
377	130621	44	3077.1	3252.33	3619.03	148.767	48.167	24.923	16.751	0.694	0	20.033	14.663	33.757	11.721	178.384	25.657	18.485	0	58.528	9.282	13.794	7.315	19.787	76.274	19.817	731.79	65.855	11.647	2.927	52.577	59.048	4937.41	8153.33	40.46	66.672	23.5563	-0.0117451
378	130878	50	1335.4	1372.34	1561.47	70.151	47.987	21.276	50.285	0	0	9.021	7.53	44.872	12.475	77.313	14.916	41.642	8.346	48.819	29.882	13.204	3.1	53.455	57.097	5.048	532.891	52.052	6.446	13.113	63.213	109.863	3941.52	7105.11	42.685	50.465	25.5207	0.652544
379	131218	27	1037.44	1124.01	1268.04	90.515	39.077	8.375	15.058	0	0	0	1.68	11.021	19.721	51.089	17.143	1.812	1.672	23.448	21.796	17.171	5.281	3.385	57.705	0	239.581	22.216	1.137	7.487	66.464	22.78	3301.09	5629.08	19.57	30.17	11.4493	8.75843
380	131705	62	2825.71	2726.43	3266.17	158.205	33.536	30.472	7.364	0	0	50.404	35.617	76.164	42.098	224.541	37.975	26.128	2.42	47.748	41.364	40.195	7.769	27.966	75.465	19.154	588.794	41.351	27.097	31.077	56.196	78.361	4130.43	6940.24	34.627	156.126	22.8881	-5.59144
381	131850	33	810.95	862.161	945.784	29.787	19.337	3.859	9.783	0	0	0	9.032	16.265	8.581	34.843	6.732	0	0	22.367	15.061	0	1.671	0.606	13.295	7.53	177.961	8.935	12.38	1.133	11.95	4.387	1599.71	2998.26	22.298	84.843	8.0069	20.618
382	132114	78	1102.59	1102.07	1279.14	89.181	34.341	24.174	6.559	0	0	3.278	6.966	15.912	13.058	94.788	20.602	3.313	1.671	25.2	20.82	6.487	10.093	16.313	44.22	0.241	386.711	13.406	9.736	8.871	23.014	63.889	2437.25	4383.65	21.002	45.715	16.8399	6.32703
383	132351	32	2975.42	3109.02	3594.22	111.826	21.655	15.456	2.279	0	0	22.967	4.575	1.016	2.4	268.363	0	0	0.17	10.987	0.358	5.469	3.086	0	21.133	0	242.804	9.193	0	0	0	10.047	1384.93	2455.77	9.273	34.555	11.2592	0.127867
384	132502	52	2602.89	2518.87	3023.75	100.384	34.348	22.706	4.893	0	0	21.167	10.379	34.467	8.781	66.57	20.726	27.159	1.651	29.558	28.462	34.347	0.272	17.227	65.291	0	453.6	40.71	0	10.694	33.684	59.381	3354.39	6150.28	67.833	85.357	16.5994	0.653718
385	133412	46	1417.37	1472.19	1669.03	104.727	32.134	8.872	8.007	0	0	0	0	13.84	7.17	28.969	14.812	9.44	0	33.993	22.023	8.596	1.576	5.264	66.281	2.08	318.415	7.393	10.686	4.807	37.356	7.357	2524.32	4206.14	12.303	46.017	13.0613	11.7357
386	133525	33	2688.6	2849.79	3215.73	102.728	32.996	14.39	11.506	1.751	0	1.857	7.14	23.62	158.416	58.317	3.465	3.625	0	29.779	1.065	32.875	0	15.838	39.304	0	471.492	43.907	2.073	4.593	12.974	11.751	3755.86	6612.94	7.063	41.297	16.2424	1.32432
387	133992	48	2195.92	2364.8	2457.38	97.078	35.956	27.074	15.369	1.997	0	7.978	15.131	29.377	40	163.147	49.696	30.117	5.085	59.203	51.02	9.497	19.949	229.818	99.075	3.197	679.732	51.092	22.244	16.273	222.799	480.99	4787.62	8299.01	47.149	68.19	24.1876	1.19451
388	134224	52	2393.43	2238.13	2664.35	90.718	48.442	23.546	17.786	0.586	0	10.417	33.418	55.631	18.74	171.206	11.688	12.869	3.381	40.468	16.514	7.178	13.412	33.368	96.658	1.244	688.956	72.968	6.833	9.73	44.709	98.803	4828.94	8869.73	46.683	90.99	27.8986	4.33821
389	134292	47	2418.57	2484.6	2696.95	97.005	42.041	22.778	9.752	0	0	0	13.618	11.646	7.438	61.521	2.453	10.175	4.303	53.031	14.593	14.801	2.554	10.789	51.064	9.266	356.071	50.377	8.087	3.992	10.586	24.608	2852.73	4859.13	46.689	45.828	19.0389	6.31455
390	134484	31	405.119	415.324	448.644	26.544	16.183	14.925	3.212	0	3.026	0	13.251	6.16	7.525	25.226	1.156	4.176	1.01	31.506	12.151	5.695	0	1.028	57.355	3.202	202.052	33.406	3.786	3.504	30.337	100.052	1269.72	2393.53	19.418	32.78	12.6422	13.531
391	134485	38	3754.33	3861.02	4208.36	147.248	28.978	26.321	3.814	0	10.998	43.753	0.753	510.731	8.41	660.226	0	20.634	0	12.676	0	281.145	1.308	0.008	3.503	0	1546.52	2.555	0.714	6.48	4.644	4.249	2071.22	3877.93	50.502	82.129	-10.4137	3.24959
392	134516	59	3318.54	3352.15	3715.36	150.502	60.816	38.5	1.015	3.594	0	15.828	3.743	16.115	0.76	14.624	11.7	0	0	5.057	4.285	1.398	4.917	0.829	14.007	0	139.163	5.433	0	7.682	2.522	18.064	1041.95	2085.78	5.637	68.813	-5.39555	16.9422
393	135304	65	1637.08	1814.46	2102.69	100.573	42.716	17.361	28.648	0.066	1.233	0	10.603	18.972	9.928	99.224	9.072	2.982	0	52.826	26.187	5.413	9.014	8.437	90.238	1.184	461.38	42.617	10.554	1.312	61.37	32.748	2078.35	3424.29	52.337	89.226	25.5995	9.68373
394	135540	34	709.216	768.147	872.826	32.954	18.956	3.733	9.235	0	0	71.815	0.134	7.97	1.51	65.306	0	0.945	0	14.238	0.404	0	1.188	2.287	8.567	0	217.74	13.498	0	0	33.706	2.537	764.607	1696.11	75.911	74.986	1.63807	19.4586
395	136457	84	2568.3	2681.97	3017.93	139.571	87.119	50.541	35.581	0	0	30.906	23.047	147.297	51.481	402.763	72.009	22.819	6.977	96.669	83.878	17.883	15.48	56.228	99.02	28.729	903.062	47.369	24.894	25.195	93.048	103.468	4321.35	7632.68	11.007	148.507	25.734	-7.3802
396	136892	52	1860.56	1869.51	2200.37	127.491	21.384	12.157	13.211	0	0	11.239	2.461	34.166	25.578	94.868	10.183	0	2.47	17.728	17.345	1.328	3.447	10.589	48.167	0	252.864	9.592	9.371	5.996	36.088	84.049	2543.08	4535.04	16.033	97.403	15.8388	16.4696
397	137025	45	283.902	269.024	269.888	25.16	18.988	0.658	7.182	8.894	0.523	0	1.26	10.154	0.547	16.183	5.137	0	0	13.784	1.518	0	0	11.936	13.872	0	107.943	0	2.872	2.231	2.879	4.686	415.677	767.951	1.233	9.524	-6.32954	15.2696
398	137088	56	1139.16	1152.62	1303.21	53.334	30.712	6.195	5.59	0	0	0	5.099	7.809	7.543	25.191	0	24.895	0	31.193	16.901	10.417	0	0	41.412	0	183.106	6.06	0	0	12.655	77.375	1173.14	2010.06	40.862	58.982	2.95139	13.0129
399	137843	35	1438.82	1488.67	1678.26	101.21	37.862	16.83	3.387	0	0	12.468	0	12.195	3.848	33.479	2.688	0	0	25.614	22.326	2.075	3.886	0.104	39.781	0	245.064	24.665	0	3.037	10.911	11.651	1520.83	2804.98	3.933	54.671	13.6659	23.0964
400	138323	27	1648.07	1745.63	1945.84	69.89	29.491	12.505	11.948	2.316	0.732	6.131	19.946	55.441	30.213	253.064	32.149	18.368	0	49.296	35.196	13.206	0.216	23.496	53.686	8.658	719.269	33.674	32.271	20.243	48.252	99.505	4152.87	7777.61	3.715	102.074	22.3878	-2.02009
401	138372	68	1758.05	1785.05	1979.14	66.992	37.233	13.987	6.469	0	0	0.392	2.886	33.713	5.418	16.288	8.048	0	0	48.392	11.318	3.743	0	15.35	26.158	7.13	277.911	14.029	0	7.777	7.951	14.658	1826.22	3449.69	30.231	90.817	13.3772	19.4131
402	138471	46	2240.21	2361.08	2610.75	138.499	49.774	24.96	17.316	0	0	11.647	9.441	25.232	6.161	45.966	15.292	23.065	0.588	51.653	12.756	9.483	6.77	79.961	62.692	5.132	587.531	37.745	10.376	10.592	173.472	231.135	4231.97	7806.53	12.748	67.346	20.714	9.29948
403	138522	29	1165.15	1278.91	1294.41	54.386	34.535	10.739	3.142	0	0	7.833	0	2.959	10.19	46.608	6.105	1.552	0	23.085	24.394	0	0.296	10.827	42.56	1.446	279.01	14.008	5.077	7.061	23.609	63.888	2821.28	5125.62	14.46	25.822	10.4809	26.6998
404	139568	51	3556.19	3505.4	4040.96	185.351	57.33	26.072	7.696	0	0	5.568	36.474	43.845	19.732	232.998	25.161	13.155	2.888	34.264	43.345	41.161	18.672	95.362	48.58	2.449	706.778	27.447	25.94	6.039	246.291	1965.36	6534.96	12421.9	18.306	45.458	19.9311	-3.7855
405	139613	44	1229.11	1160.55	1431	71.584	20.694	10.429	1.35	4.143	0	8.049	3.723	8.166	16.187	58.451	11.191	1.499	0	16.681	22.72	0.14	1.526	9.2	22.295	0	258.245	13.027	3.993	1.256	31.627	0	1809.69	3194.35	62.696	65.467	8.4538	23.0197
406	139778	30	1914.28	2041.1	2276.92	59.409	32.371	22.555	6.557	0	0	8.641	7.89	16.352	1.344	23.647	4.163	0.822	0	34.553	20.192	12.109	0	2.059	35.301	0	345.815	27.262	0	1.631	6.216	15.763	1784.85	3093.51	11.883	42.351	12.3893	9.71521
407	139854	38	7671.98	7807.69	8624.57	328.938	32.981	19.662	0.472	0	0	4.686	3.501	44.959	17.739	115.129	10.038	21.179	3.787	14.43	13.887	4.345	3.992	9.413	39.139	6.098	470.279	17.408	5.388	3.411	8.945	61.398	3950.97	6969.19	11.523	41.253	16.4777	11.6386
408	140450	41	467.229	424.639	564.928	61.817	26.245	15.95	14.669	0	0	4.774	4.899	7.76	6.771	5.916	10.792	6.747	4.21	20.719	4.032	0	0	3.634	29.92	0	213.677	9.569	0	2.197	14.397	21.101	1064.71	1761.94	30.423	10.913	-0.7816	31.3204
409	141287	28	933.363	840.202	934.56	59.634	20.348	7.025	24.168	0.353	0	27.889	9.982	141.295	40.714	446.147	48.674	32.456	8.275	20.221	22.611	23.482	9.635	35.61	32.395	13.062	450.353	26.739	22.754	14.759	15.386	574.54	1145.81	2231.13	3.586	36.712	18.9858	-3.9527
410	141800	41	2306.29	2441.34	2666.43	97.279	36.911	27.101	18.998	1.478	0	1.203	4.215	23.754	8.402	37.264	21.727	19.102	0	29.497	13.812	7.586	0	25.091	78.642	8.224	508.642	16.035	12.752	7.774	101.126	25.712	3699.11	6877.3	15.775	54.177	14.4211	11.1625
411	141882	31	1438.63	1405.66	1560.84	67.194	16.934	7.094	8.366	0	1.543	5.68	6.539	9.989	24.559	59.297	10.557	5.678	1.299	36.045	17.134	3.225	6.174	10.971	6.274	1.366	343.357	15.748	2.774	0	14.27	12.873	1836.26	3428.03	14.822	23.75	9.00401	14.5774
412	141906	36	968.677	1033.14	1170.2	47.299	25.726	6.925	10.633	0	0	0	3.477	30.02	8.943	51.05	10.898	3.31	0.818	14.804	17.613	7.601	9.6	13.193	25.182	4.903	221.44	47.249	7.571	22.832	14.68	34.9	1425.32	2677.53	14.239	34.868	12.3962	12.1437
413	142135	30	974.396	1156.26	1218.52	66.241	16.7	10.779	3.582	0.799	1.674	11.416	0	7.378	3.036	35.023	8.364	0.641	0	14.903	10.313	0	0	11.95	8.542	0	147.595	6.66	2.707	2.588	5.368	7.542	999.121	1992	15.957	46.559	-3.57922	19.2602
414	142142	33	2353.39	2431.29	2634.22	69.436	34.756	18.119	2.172	0	3.909	4.418	19.872	51.049	47.021	147.148	44.075	11.534	1.055	18.94	18.79	26.24	8.506	9.14	52.382	24.324	544.396	19.889	11.12	17.406	32.716	50.552	4274.32	7984.73	27.256	30.632	17.1467	-0.698027
415	143129	59	2398.23	2583.01	2849.77	146.083	48.193	24.22	38.255	0	4.698	14.946	6.278	23.724	11.336	121.767	56.132	30.998	3.102	45.237	49.919	0	1.357	179.282	79.993	10.717	802.644	51.8	22.884	4.332	235.705	326.044	4558.61	8242.92	31.517	99.726	27.9336	11.199
416	143266	51	1343.52	1327.9	1474.73	57.091	20.119	12.374	0.121	0	0	0	9.063	8.218	31.657	42.433	5.293	1.51	0	18.073	2.117	0	0	3.329	16.73	0	132.38	22.662	0	0	0	5.894	1005.27	2025.66	4.87	72.904	7.89658	23.063
417	143282	65	1982.33	1879.84	2220.23	92.821	35.935	6.508	6.805	0	4.504	31.856	5.989	4.198	15.444	1501.41	15.371	3.195	0	31.779	9.396	598.144	0.261	22.14	30.333	26.476	3816.69	29.774	8.26	1.386	0.653	0	1040.97	1772.27	35.746	82.573	-16.5056	-13.1818
418	143724	32	1115.65	1296.68	1232.43	53.455	13.553	9.962	20.141	1.033	0	5.82	26.727	94.44	19.183	244.545	21.305	24.802	0.655	32.673	51.513	22.57	1.321	17.516	59.544	3.725	468.156	19.395	12.579	7.367	31.488	110.241	2073.01	4033.6	12.802	19.299	20.5303	-3.6091
419	143739	40	1207.73	1142.19	1310.51	53.59	42.515	2.801	20.337	5.938	0	0.948	10.663	4.119	14.607	31.003	5	7.441	0	23.255	10.154	0	10.089	2.917	15.997	0	224.244	13.365	6.23	0	16.328	7.251	1953.81	3393.51	13.092	41.932	4.04008	27.3207
420	144318	42	663.446	711.288	808.818	43.572	6.73	2.21	1.172	0	0	0	0	11.194	5.687	46.037	10.179	3.204	1.061	24.349	12.418	0	0	13.323	46.067	7.772	304.422	21.414	0.883	9.11	9.051	5.027	1362.14	2475.54	45.031	115.045	14.3246	23.0523
421	144512	52	1266.55	965.6	1294.05	59.425	30.456	4.209	3.579	1.72	0	0.955	3.68	13.568	5.557	39.78	2.405	3.115	1.693	33.078	22.184	0	7.386	5.521	11.804	0.281	147.707	44.693	7.337	0	16.527	23.592	1326.8	2219.22	20.943	68.809	9.84548	21.7105
422	144537	48	2433.94	2428.12	2735.72	110.91	28.753	21.719	16.67	0	0	14.717	2.646	25.21	14.404	62.459	7.948	15.835	5.405	47.33	32.766	26.893	0	0.333	35.047	4.892	502.229	22.341	0	7.82	27.228	17.776	3159.26	5836.52	41.999	98.118	16.5298	1.44815
423	144637	40	1632.4	1745.29	1978.13	76.884	17.375	4.217	5.001	0	0.912	0	7.054	10.886	9.066	34.117	1.59	0	0	30.994	3.832	0.857	1.632	3.844	61.315	5.614	324.266	19.025	3.532	0	0	0	2213.84	4129.55	30.255	58.74	14.7398	23.2877
424	145018	62	88.84	77.063	120.178	13.134	4.411	5.365	23.747	0	5.877	6.944	1.004	8.627	15.538	55.401	14.129	9.378	1.614	41.096	15.285	5.799	17.995	6.936	24.521	2.451	209.822	7.967	4.38	15.224	6.515	54.056	1181.93	1877.04	15.7	65.882	10.7285	14.6344
425	145220	58	1360.9	1457.65	1447.36	60.829	43.679	25.696	13.307	0	1.769	2.459	14.99	43.493	23.425	136.693	38.436	14.498	0	46.792	17.346	7.101	0	20.357	23.755	18.563	369.721	39.593	5.709	3.865	52.992	11.737	2415.59	4325.44	16.14	98.134	22.9306	6.00244
426	145367	46	1559.06	1726.74	1869.85	87.133	53.452	19.593	5.946	0.987	0	25.892	17.415	18.134	15.238	45.427	0.419	0.389	0.755	23.855	16.438	8.115	4.074	14.545	36.78	1.061	406.61	17.83	7.616	20.033	4.414	19.688	2621.58	4647.46	33.039	65.918	13.6821	12.4788
427	146088	27	811.381	740.216	827.747	38.772	4.551	16.909	4.812	0	0	0	1.968	14.492	6.117	14.795	0	6.862	0	17.726	10.086	2.932	0	9.555	20.244	4.343	63.801	13.487	0	0	18.38	9.318	896.016	1955.65	20.065	39.746	-1.85611	16.943
428	146198	39	888.997	1085.23	1130.49	64.043	12.73	2.071	4.618	1.225	0	10.336	2.414	28.89	19.07	56.002	12.723	2.38	1.906	31.296	8.935	8.389	0.982	13.643	64.718	0	158.222	22.889	0.269	14.426	20.107	3.995	1341.46	2298.2	18.012	36.906	17.5859	9.9701
429	146277	37	425.521	474.342	630.748	18.943	17.227	6.009	18.751	0	1.481	5.454	0	13.635	13.026	34.76	32.084	14.821	0	30.235	38.196	0	0	170.112	38.625	1.358	199.283	12.598	1.452	6.222	307.3	147.832	945.952	1603.27	9.374	48.267	13.1645	21.2297
430	146417	35	1899.37	1898.83	2210.07	113.081	31.178	19.094	4.353	0	1.357	28.281	28.113	60.191	42.289	506.172	55.843	17.44	0	31.144	49.645	35.097	19.102	25.918	60.789	6.204	695.067	30.435	11.966	41.728	56.817	142.987	3980.52	7386.34	6.301	145.434	21.704	-5.12893
431	146506	71	2081.27	2075.73	2325.77	124.332	38.86	23.656	17.53	0	0	6.694	19.838	49.15	0.272	103.075	0	11.418	0	94.09	15.685	19.607	0	21.641	56.072	15.19	610.306	68.165	11.139	0	56.402	22.763	2878.28	5009.02	40.589	69.8	26.2988	-2.34107
432	146710	36	2360.44	2403.47	2753.72	171.2	31.511	15.948	35.243	0.096	0	0	29.336	77.684	44.442	322.202	26.527	40.629	5.513	48.529	29.18	36.427	4.121	35.346	39.356	19.218	727.141	58.403	18.468	30.161	138.946	134.887	5749.17	10465.8	21.602	62.396	22.0431	-4.94341
433	146886	61	1451.32	1394.28	1479.14	239.927	33.157	166.313	20.108	0	0	0.502	20.058	33.094	23.157	153.636	21.974	31.38	1.036	78.413	18.65	19.706	4.829	68.062	55.742	0	625.831	34.103	11.236	8.223	189.129	115.025	4172.94	7335.78	10.987	62.079	22.6346	0.551214
434	146900	45	2741.38	2792.92	2919.28	130.226	31.257	6.364	1.792	4.689	0	49.755	5.094	3.155	11.047	3152.71	18.146	4.907	0	31.587	6.381	4.229	1.805	12.403	16.754	21.274	3389.62	24.265	0	0	1.275	0.101	1359.1	2397.31	83.81	56.754	20.0077	-14.4222
435	147032	62	1481.46	1494.66	1494.26	64.66	31.403	15.105	14.553	1	3.353	5.96	0.645	9.382	9.806	31.223	6.569	6.56	1.979	17.579	3.905	12.899	0	21.243	23.61	5.037	245.751	8.35	8.416	0.5	9.217	31.56	1487.82	2629.76	41.959	69.267	3.44485	11.9204
436	147672	56	1585.04	1556.97	1745.02	94.735	33.318	14.703	10.036	0.331	0	0	5.744	35.565	0.089	23.104	5.685	24.31	0	27.772	16.701	35.345	0	3.473	49.158	0	328.625	25.23	5.924	0	3.004	2.866	1724.97	2957.95	36.022	94.004	11.5562	7.89168
437	147983	38	2399.19	2468.07	2633.51	104.117	40.341	38.191	26.258	0	0	15.928	12.849	66.864	21.231	206.234	28.545	17.072	7.098	34.04	40.234	14.997	2.385	62.307	55.021	10.274	687.808	12.83	19.937	11.557	170.855	123.744	6190.66	11584.7	28.718	86.059	19.867	-2.1983
438	148307	37	618.056	468.922	609.664	39.505	7.295	0	0	0	0	0	1.229	3.152	18.393	24.511	3.702	0.495	0	9.788	2.521	2.908	0	10.458	11.403	0	112.439	9.612	2.467	4.853	0	0	664.812	1242.53	3.43	20.636	-1.05195	26.9788
439	148991	40	2534.29	2457.07	2971.3	135.524	43.935	24.891	0.763	1.736	3.041	2.665	10.285	23.958	6.019	59.835	3.225	12.615	3.005	72.441	13.531	22.661	1.142	4.585	105.17	5.308	374.8	16.975	0.664	1.722	11.777	14.605	2352.96	4367.75	38.723	75.961	17.1818	1.89635
440	149677	28	2285.03	2412.62	2714.49	105.03	20.325	28.273	8.275	0.603	0	0	0	13.916	0.174	14.527	1.509	1.188	0	5.735	4.989	15.369	0.335	12.839	40.93	9.653	356.716	19.866	0.777	6.197	7.007	10.484	2731.86	5029.57	27.385	39.541	8.46996	10.8356
441	149709	72	1341.72	1215.87	1313.64	69.92	26.086	10.071	6.574	0	0	0	0.871	14.602	0	20.977	5.098	4.68	0	16.75	18.845	0	0	3.759	4.239	11.731	140.317	20.706	3.285	0	10.219	9.414	902.182	1790.11	11.977	42.002	-2.59775	19.8607
442	149735	38	1722.67	1741.6	2011.16	85.164	30.013	13.398	20.67	0	0	0	8.848	40.91	8.36	74.904	3.845	16.008	1.762	21.598	10.33	6.549	2.368	26.642	22.021	5.213	425.155	25.64	5.189	16.834	46.292	100.152	4442.41	8066.45	24.145	35.382	15.7928	10.2777
443	150146	49	1633.85	1408.07	1725.39	77.58	33.548	9.599	1.79	2.168	0	9.752	10.804	16.843	0.146	36.942	13.129	0	0	27.816	10.031	8.974	3.01	10.266	70.7	7.598	167.404	6.344	1.078	3.64	21.674	6.875	1166.15	1991.21	3.664	120.812	7.37924	11.8737
444	150224	66	3861.85	4005.72	4360.71	175.559	54.83	41.516	0	0	0	28.812	2	0	1.935	394.022	9.314	0	0	18.348	4.216	62.341	11.918	7.208	17.173	2.023	372.683	1.191	0.702	1.241	0.752	12.64	1090.22	2132.99	0.741	66.615	-1.9982	-0.479073
445	150789	66	1781.35	1708.64	2118.2	89.884	46.901	21.434	11.391	0	0	17.523	17.162	33.148	11.843	85.188	7.669	10.573	0	35.658	25.251	7.247	4.325	4.25	42.391	1.694	343.219	20.05	11.243	0	26.801	7.39	2264.39	4244.16	20.966	87.714	17.5286	11.0666
446	151350	57	2176.06	2297.58	2364.56	94.792	42.721	9.072	0.451	0	0	0	0	31.539	3.042	21.9	1.344	0	0	31.239	31.379	0	5.933	1.174	37.97	15.256	257.493	25.227	6.426	0.071	65.698	10.296	1176.36	1877.28	23.779	15.142	14.8189	20.5766
447	151423	35	413.75	384.368	432.805	16.707	13.811	4.911	4.119	0	4.494	2.67	0	0	2.099	3.924	0	0	0	2.268	3.778	0	0	0.207	0	0	79.409	14.723	14.996	1.543	17.951	23.927	475.669	961.286	2.408	0	-12.6723	24.363
448	151564	31	3512.41	3472.85	3925.82	215.382	66.259	11.223	0	0	3.481	14.86	3.815	724.802	3.921	5.442	1.372	0	0	2.602	0	2.748	0	1.458	0.099	0.545	20.346	4.222	2.399	0	0.02	0.003	1232.53	2281.63	12.971	27.349	-20.014	17.7064
449	151713	37	2079.16	2130.75	2203.42	117.42	16.102	21.73	0	0	1.888	38.853	0	5.911	2.794	158.148	0	2.555	0.331	1.017	5.67	2.836	7.368	3.978	8.883	0.233	49.111	0	0	2.304	2.015	74.464	936.517	1735.63	5.964	48.372	-0.745506	7.46431
450	151921	45	2478.11	2572.72	2868.84	113.334	53.185	12.469	3.409	0	0	62.472	1.753	4.048	0	17.672	0	0	0	10.871	0	0	0	0	24.953	1.943	181.246	17.426	1.269	0.649	0	8.73	1536.2	3119.09	7.238	27.141	0.413537	29.1587
451	151995	30	1504.56	1377.64	1659.35	103.342	38.343	13.235	11.248	0	0	7.539	7.707	33.736	12.439	70.77	0.387	15.005	0	34.673	16.716	0.748	0	4.441	35.324	6.343	350.829	50.086	6.722	0	32.927	69.984	3041.37	5509.65	21.501	45.804	22.136	15.1542
452	152194	41	1397.78	1405.51	1580.8	77.475	29.582	13.465	9.252	0	0	0	5.689	3.085	4.807	52.204	8.048	3.465	0	33.05	17.728	1.702	0	11.023	37.432	0.779	346.298	26.19	5.977	10.211	58.173	42.914	2365.74	4238.67	19.479	54.157	12.0696	26.2547
453	152393	47	6783.04	7519.26	8274.63	340.542	142.505	88.552	1.448	0	0	26.217	4.613	433.54	4.784	4.967	2.082	0	0	13.618	3.966	2.23	0	3.215	10.859	1.291	129.125	0	0	2.914	15.913	42.539	6106.13	11370.9	15.346	16.283	-22.1299	14.1778
454	153277	36	1723.84	1575.13	1793.95	98.144	19.904	15.426	7.406	0	0	0	10.874	18.922	8.704	31.81	10.184	1.76	0	26.641	18.776	0	0	3.608	54.527	1.405	179.295	49.379	7.465	3.917	0	2.239	1478.95	2624.68	28.636	22.908	17.6549	21.6777
455	153562	53	1716.04	1772.09	1999.58	90.595	48.642	25.014	6.561	0	0	0	8.726	9.31	10.615	75.564	2.071	0	1.954	45.304	28.063	0.906	11.817	0	88.214	11.095	345.93	36.432	5.767	1.558	17.077	5.808	2953.28	5341.94	42.829	98.201	21.6133	21.0061
456	153821	37	1751.45	1815.39	2152.7	107.375	50.959	14.509	22.633	1.09	0	18.45	24.151	39.031	8.089	102.243	10.569	1.927	4.477	47.642	13.988	5.195	0	18.282	62.358	3.044	524.64	40.316	9.477	9.83	6.86	25.673	4226.94	7461.79	60.513	130.932	23.8117	7.84426
457	154000	41	2665.04	2714.74	3125.67	116.282	48.977	11.992	1.81	0	0	54.471	9.803	1.626	0	453.901	1.608	0	0	30.689	0	539.057	5.929	2.825	26.051	12.739	1307.7	4.255	3.746	0	16.149	4.911	818.675	1620.06	56.388	54.767	-8.3224	-5.14903
458	154122	71	3944.72	4411.18	4826.58	228.249	64.008	38.48	0	0	0	16.176	1.976	9.833	3.07	862.751	13.008	0	2.823	23.224	4.657	22.87	3.589	14.029	12.862	11.171	1424.11	12.367	2.415	1.075	8.085	13.369	1613.94	3082.62	11.087	55.273	5.48341	-14.3248
459	154515	56	4611.71	4344.95	5151.39	213.469	86.751	50.336	1.839	0	0	10.066	0	12.503	4.383	815.668	5.938	1.329	0	15.05	8.741	40.842	6.932	9.463	29.496	3.036	2749.7	11.74	0	0	1.887	6.565	1294.79	2315.1	5.904	59.447	-4.2944	-16.2891
460	154579	41	812.537	873.303	892.17	37.477	23.535	2.731	12.059	0	0	0	14.811	18.62	8.53	44.397	1.807	2.736	0.483	4.929	11.076	5.194	2.126	7.736	17.497	0	174.479	29.625	6.417	7.792	8.872	168.219	1001.07	1856.99	12.71	46.289	7.06388	13.9485
461	155246	39	501.71	467.896	555.159	18.827	14.387	8.693	0.811	3.248	0	28.593	4.026	13.65	2.267	562.372	8.853	0.705	3.075	15.145	2.915	0	3.521	9.299	30.573	0.666	34.217	16.294	0	4.954	14.486	4.953	775.818	1504.38	74.799	81.012	0.726821	7.77196
462	155247	50	2868.47	2892.25	3324.28	131.559	47.862	16.671	31.142	0	0	0	15.206	34.412	17.186	81.226	8.089	4.494	0	49.284	23.947	13.493	18.095	23.345	64.956	6.073	424.764	34.264	7.37	15.526	50.904	15.72	4018.71	7471.25	19.247	143.168	19.1167	1.62664
463	155283	28	536.112	613.321	638.731	23.377	6.197	12.21	10.465	0	0	0.427	17.963	0	3.28	25.126	22.383	9.728	2.056	4.412	10.358	1.741	0	8.55	36.046	5.39	207.304	7.681	2.123	0	7.451	144.001	1559.2	2680.33	40.039	38.729	-1.64853	25.1609
464	155315	33	3018.26	2835.43	3208.37	108.436	22.457	10.136	1.85	0	0	11.641	4.67	11.564	11.267	40.031	1.021	25.639	4.904	24.143	24.976	47.284	5.067	7.557	33.61	0	316.426	15.761	4.704	0	14.962	23.85	3072.88	5380.76	27.391	52.082	12.0576	2.56614
465	155331	31	1203.28	1214.26	1433.44	62.342	24.386	21.003	7.623	0	3.57	32.516	0.217	2.05	12.961	254.764	3.496	3.383	0	11.084	0	0	2.506	0	3.468	6.41	191.398	10.754	0	0	1.61	3.629	1009.74	1785.01	77.305	86.632	0.677769	6.05883
466	156911	45	1539.09	1316.4	1621.01	65.056	25.975	15.105	12.53	3.582	6.888	7.623	9.166	25.724	11.189	87.603	14.7	51.957	0	36.529	2.807	11.321	0	11.992	36.815	20.268	354.075	10.69	9.762	14.441	36	58.478	2337.55	4388.48	21.292	62.032	14.1124	5.29103
467	157121	32	1683.19	1757.66	1863.56	55.696	28.596	19.958	4.711	0	0	8.209	11.775	30.462	18.357	119.143	19.72	12.033	5.541	19.673	41.873	6.119	15.289	7.207	34.345	0	307.434	52.794	10.051	0.291	30.579	9.773	2834.35	5025.4	25.324	48.58	16.469	10.2528
468	157378	43	4590.58	4329.9	4722.19	186.154	42.964	29.649	7.172	0	0	8.025	5.972	13.144	29.387	55.686	6.965	13.851	0	10.956	57.788	7.343	7.452	2.719	154.231	14.417	781.422	16.57	28.966	1.409	364.437	23.116	3066.5	5177.34	46.234	56.286	15.9808	14.2591
469	158753	34	1959.96	1803.78	2139.16	81.303	18.022	23.067	4.53	0	0	1.733	8.867	16.241	3.417	79.171	14.389	0.878	1.17	35.861	39.542	2.861	0	80.731	50.277	1.73	363.836	38.306	9.915	0	111.324	152.625	3275.91	5971.75	19.396	45.439	21.6541	14.0669
470	159745	39	738.264	659.123	701.73	43.58	14.605	6.905	0	0.932	0	0	0	6.716	4.512	18.436	4.528	0	1.284	11.467	9.369	0	0	0	10.202	0	72.543	9.123	0	2.354	12.655	10.3	729.399	1282.08	3.573	35.182	-3.74234	18.4332
471	160824	39	925.389	907.232	1010.75	59.93	6.972	15.23	0.953	0	0	0	8.589	32.597	8.392	120.639	27.279	6.567	0	4.118	8.698	5.138	2.892	10.258	22.694	0	188.102	7.106	13.267	10.395	15.943	46.554	994.373	1691.98	8.337	44.764	6.38533	14.1603
472	161050	39	1114.72	1057.99	1060.34	86.432	21.402	2.902	0	4.374	0	9.632	4.547	15.249	3.652	23.577	9.06	8.073	0	10.986	10.194	0	2.378	15.867	24.555	0	196.093	20.512	0	4.032	11.101	0.119	1240.79	2133.94	23.437	39.283	6.36387	20.9778
473	162009	63	2313.34	2416.31	2606.69	112.669	44.338	25.283	5.638	1.436	0	22.337	0	13.195	11.663	85.493	5.493	9.339	9.384	53.078	24.255	5.569	3.068	9.252	47.858	0	407.028	17.34	7.781	7.532	30.161	9.011	2999.51	5853.24	20.611	136.601	18.7694	6.58929
474	162054	49	3722.19	3800.58	4272.1	164.462	29.654	36.892	2.261	0	1.619	99.634	0	42.927	2.212	60.631	8.276	12.317	5.045	32.018	7.595	11.201	7.438	11.363	49.79	3.423	322.425	3.402	4.286	6.295	35.438	13.18	3638.49	6187.4	84.615	155.775	6.49785	9.54081
475	162609	29	305.429	279.248	319.727	15.438	4.9	2.675	0	0	0	0	1.274	1.095	0	3.469	0	0	0	5.047	0	0	0	2.048	3.467	0	14.453	7.624	0.627	1.449	0	0	368.13	657.702	14.328	2.272	-13.4892	25.0691
476	163337	59	445.037	550.891	571.058	33.895	9.194	4.703	10.383	0	0	0	2.996	19.508	0.92	1.205	1.257	0	0	14.717	1.658	2.275	1.66	0	10.528	2.93	97.06	12.609	0	1.629	6.352	24.746	575.296	1049.7	10.811	17.35	-6.97883	17.9569
477	164251	44	2864.78	3157.54	3509.81	123.094	62.775	21.861	8.88	0	0	0	2.547	13.18	7.816	82.364	12.325	5.578	2.099	39.72	20.451	9.191	0	21.324	59.129	16.868	460.316	65.488	6.591	3.565	36.498	40.869	4513.72	8373.16	20.366	51.87	22.2438	4.45249
478	164586	37	990.423	1023.62	1404.06	65.046	30.091	12.911	0.927	0	0	17.441	6.614	39.193	4.828	91.545	27.577	15.176	0	45.597	11.425	0	4.589	21.764	20.788	3.637	248.704	8.568	17.642	7.919	10.675	19.506	2004.73	3521.94	11.087	34.568	11.4595	16.9721
479	165090	67	3680.24	3567.76	3952.48	156.451	56.582	35.463	3.402	0	3.938	16.411	8.538	33.865	7.419	71.097	19.275	37.187	0	15.348	8.839	0	3.353	5.5	16.128	4.177	236.2	10.996	4.413	5.628	4.552	33.384	1775.36	3250.18	17.573	65.295	11.2942	17.4926
480	165279	50	4525.13	4384.54	5334.33	164.329	42.473	19.262	11.49	2.129	0	1.579	12.701	41.267	2.882	147.295	22.141	9.674	0	59.833	54.865	13.469	4.68	18.879	127.306	9.424	859.508	55.188	15.873	19.598	82.387	251.481	5848.72	10868.1	47.393	98.007	27.7406	-1.37999
481	165813	38	3875.72	3752.68	4386.53	187.672	45.176	24.022	36.353	7.4	0	2.065	34.428	86.162	29.381	329.182	84.981	51.376	2.636	99.026	64.873	25.918	20.284	321.034	74.079	14.617	1058.87	48.267	27.424	26.371	889.775	633.769	6215.96	11404.8	38.304	103.124	25.6186	-6.70629
482	166018	48	1602.29	1878.08	2033.95	91.433	69.577	14.31	0	0.393	0	52.275	5.415	1.246	0.213	9.436	1.733	0.654	0	0.589	0	4.142	11.437	1.806	9.118	0	69.366	0	5.748	0	0	19.889	1029.4	1932.08	12.842	6.566	-11.2702	25.5714
483	167132	44	1732.29	1625.29	1787.81	88.544	18.025	26.735	19.688	0	0	2.675	2.749	19.603	21.651	76.319	12.484	0.521	0	49.211	27.529	0	0	5.428	52.836	18.629	413.182	21.416	1.389	3.536	26.893	23.715	2931.26	5398.16	30.085	63.405	22.9023	16.3311
484	167546	24	533.621	544.16	648.08	49.075	13.721	8.67	0	0	0	0	2.133	0.893	3.512	15.283	0.968	0	0	16.753	0.168	0	0	0	20.459	0	48.342	3.697	2.112	0	20.53	0	630.803	1176.57	38.997	32.034	-4.41137	28.182
485	169687	43	2830.56	2958.58	3204.21	114.473	52.864	24.859	19.034	0	0	1.531	21.766	43.658	17.159	151.999	17.504	24.165	2.304	56.045	27.357	9.96	10.543	113.767	85.806	3.837	482.304	21.037	7.92	27.39	199.696	369.044	3330.01	6333.17	27.147	49.268	21.3508	1.06129
486	169808	34	194.802	166.528	194.046	13.567	2.974	0.075	9.411	5.721	0	0	3.084	0	7.287	1.251	4.025	0	0	0.005	0	0	0	0	6.474	0	88.329	4.61	0	0	0	0	325.269	794.022	9.161	11.898	-13.1894	25.8718
487	170146	39	3333.48	3727.16	3931.29	171.199	27.683	17.4	14.864	0	0	2.904	4.265	14.879	10.507	134.975	52.481	9.204	0.73	67.179	24.549	7.331	5.309	109.193	102.169	1.669	692.455	72.049	4.378	5.961	228.469	489.756	5979.42	10868	17.537	35.941	27.7459	7.39609
488	170240	43	1629.63	1790.01	1973.94	56.985	28.731	11.766	21.664	0	0	13.533	19.394	37.151	40.802	160.838	38.329	27.371	0	27.011	19.568	21.46	10.129	21.151	52.28	7.559	530.945	26.237	12.827	20.746	38.526	36.034	3425.19	5793.47	30.047	85.55	19.4876	-0.280376
489	172708	37	1859.86	1744.19	2130.7	82.174	26.37	28.705	13.242	0	0	4.124	12.771	16.659	31.432	197.095	20.145	14.038	6.511	26.435	30.089	14.582	11.978	49.816	43.839	10.259	487.296	12.476	13.046	17.918	27.793	889.892	3046.16	5978.88	32.768	61.118	14.9023	3.7299
490	172745	36	2422.05	2421.86	2624.42	95.786	32.106	19.897	4.272	3.596	0	0	4.486	6.454	10.956	28.554	3.314	8.902	0	29.649	2.992	0	0	1.595	20.031	2.755	356.926	25.097	8.342	0	17.075	5.162	1934.57	3534.96	2.247	66.879	10.2857	25.0729
491	172804	48	1234.62	1187.61	1327.11	63.661	34.968	8.905	2.113	0	0	0	4.218	34.515	32.886	133.683	13.306	0.725	0	11.015	8.887	11.689	5.476	7.629	17.665	1.625	219.397	9.566	0	0.322	23.694	15.753	1523.17	2791.46	13.346	70.236	7.20707	6.81281
492	172926	40	4318.13	4360.52	4722.61	220.852	53.582	26.508	11.004	0	0	10.153	5.178	59.673	16.904	172.222	15.078	8.282	0.918	88.386	15.248	3.374	0.843	32.67	148.125	4.112	1030.67	76.021	6.433	10.138	58.104	137.697	6549.37	12500.5	21.609	72.485	30.9432	3.76707
493	173397	39	2406.19	2255.51	2726.05	116.843	49.608	28.858	0	1.189	0	17.586	0	416.975	4.427	12.201	0	4.495	0	4.809	0	5.034	3.642	0	14.514	0	63.661	0.374	0	2.882	5.735	18.747	849.254	1588.4	6.572	31.526	-21.9973	13.2182
494	173637	47	1377.13	1447.94	1699.14	61.249	22.512	28.644	23.983	0	0	13.546	9.269	21.738	17.275	81.192	12.694	2.89	2.642	42.732	28.976	6.353	3.669	12.865	60.586	0.124	383.579	41.827	29.267	17.507	17.994	61.934	1953.87	3317.69	16.508	86.101	21.8388	10.4518
495	173760	50	2192.08	2366.6	2599.88	99.099	47.552	14.593	2.976	0	0	44.124	7.905	2.914	0	7.829	1.927	0.721	0.576	7.119	12.57	0	12.851	8.834	23.193	0	126.87	0	0	1.803	9.174	18.321	1297.96	2154.18	6.037	36.2	-8.67868	26.8992
496	173971	43	1818.81	1787.7	2088.75	61.112	25.53	7.464	3.147	0	0.044	2.799	17.154	20.32	9.868	43.219	6.9	4.027	0	45.587	23.133	6.755	7.059	11.821	82.95	4.478	338.641	19.287	7.774	3.227	29.484	29.779	2053.54	3446.6	29.144	65.576	19.7079	10.5075
497	174567	47	2416.18	2327.2	2725.44	71.751	49.521	6.453	11.934	0	0.642	10.045	10.59	22.939	1.846	58.53	14.432	3.994	0	38.444	21.712	14.465	5.398	6.267	38.59	0.931	296.42	38.657	3.215	0	3.562	2.83	3248.98	5403.23	29.727	44.399	18.5582	8.76753
498	174770	27	851.769	947.883	981.221	39.583	15.497	10.986	2.314	0	0	22.629	3.141	5.679	0	59.564	3.186	0.929	0	33.768	7.419	2.048	0	0	31.281	0	292.394	7.718	10.387	3.46	3.765	34.478	2238.16	4075.52	5.303	47.715	9.41963	26.43
499	175442	63	2901.66	2810.31	3330.86	139.275	66.441	32.733	24.847	0	0	8.418	25.175	55.951	47.858	262.498	38.585	20.865	2.277	57.131	42.664	24.195	10.129	27.867	94.298	8.089	775.099	60.607	22.965	9.538	118.383	44.588	5921.43	10805.8	31.523	91.012	23.4834	-3.82827
500	175562	45	4131.6	4045.96	4651.07	210.336	26.378	18.671	9.395	0	1.997	24.884	16.638	28.499	11.373	162.945	25.464	12.942	0.6	41.7	7.926	7.638	3.356	26.98	88.119	2.117	588.205	26.116	0	20.025	69.656	24.939	4938.7	9031.59	24.854	133.777	21.3061	3.40909
501	175691	33	4185.65	4147.37	4701.4	163.38	31.962	30.611	23.152	0	0	9.859	15.784	43.135	22.413	300.477	23.295	13.787	6.625	66.626	10.478	16.657	6.443	27.736	70.853	19.907	1008.91	72.007	12.742	6.868	87.656	745.566	5955.05	11004.4	17.477	52.049	23.3637	-2.62034
502	175786	36	2588.76	2926.19	2984.16	129.649	43.31	4.896	19.335	6.15	0	0	11.955	5.28	8	93.804	122.314	34.375	1.707	36.511	33.79	0	3.752	37.061	75.717	4.07	654.278	34.163	9.869	9.874	61.171	75.279	4907.46	8873.59	29.38	41.076	27.4536	13.6708
503	175877	43	952.494	880.096	1130.89	59.813	18.854	22.966	10.111	0	0	2.023	3.008	10.332	15.586	56.377	21.439	10.279	0	15.49	21.846	5.243	9.184	55.182	68.448	0.181	265.942	19.291	5.157	0.362	140.543	659.549	2828.16	5014.14	58.7	17.659	11.1875	13.6973
504	176612	32	1396.67	1557.36	1551.96	68.362	17.681	10.351	0	0	0.634	1.811	2.895	21.161	6.746	78.274	5.848	1.162	1.141	50.582	4.594	4.437	9.098	1.421	18.425	0	163.686	14.571	11.106	5.031	0.129	0	1159.69	1951.28	6.02	33.824	14.9982	16.8094
505	176634	49	2150.15	2076.06	2101.3	113.262	10.927	21.22	3.62	2.018	0	53.88	0	74.436	0	0.779	2.542	0	0	24.423	5.208	2.153	0	0	11.1	0	35.946	0.933	0	0	0	4.544	717.146	1586.12	4.816	56.759	-14.992	16.0962
506	178341	51	2025.99	2003.64	2295.17	128.296	41.541	29.508	45.426	0	0	2.605	15.491	51.954	10.013	121.231	16.981	26.155	6.167	88.387	64.019	7.16	7.298	128.843	52.532	8.903	774.494	44.438	14.053	21.172	366.179	842.417	4705.17	8756.02	40.071	80.575	27.1886	0.230622
507	179158	31	1438.54	1481.39	1538.73	64.397	22.052	17.486	9.722	0	0	8.911	0	5.281	4.708	44.742	17.157	8.148	1.224	18.481	6.439	0	7.346	0	29.751	1.496	177.212	17.469	0	0	15.223	15.282	1538.35	2508.66	6.697	53.176	8.70216	24.3602
508	179425	49	1252.48	1331.51	1349.06	98.193	33.453	10.614	5.448	0	0	0.265	6.575	7.428	0.753	39.87	19.014	7.795	0	29.081	16.67	0.452	6.005	0.637	37.494	0	123.332	5.029	3.145	9.157	0	5.367	2004.94	3551.14	12.242	47.11	7.40357	23.8391
509	179586	36	1794.59	2078.09	2255.74	118.82	27.101	17.67	5.433	0	0	24.585	2.036	14.999	7.338	107.58	6.726	12.039	4.992	46.517	33.276	7.019	7.928	9.634	76.249	2.554	615.206	34.684	6.045	3.04	30.803	4.634	3294.33	5921.22	8.894	111.524	21.4162	4.76189
510	179714	33	3612.05	3743.76	4216.68	134.444	30.408	10.638	0	3.81	0	10.182	0	10.692	0.012	134.383	0.987	1.973	0	29.598	0	0.634	2.118	0.246	25.436	0	496.617	1.633	0	2.851	0	13.886	1528.14	3211.44	4.371	52.556	9.57116	1.71582
511	180180	50	1657.44	1688.18	1832.75	110.576	19.658	17.515	8.427	0	0	0	0	33.932	8.161	65.312	288.854	9.313	1.106	40.222	13.689	3.238	0.424	0	23.417	5.841	396.912	29.505	0	9.434	42.507	46.925	1913.43	3281.25	22.258	46.395	19.3097	13.8783
512	180238	24	610.488	654.187	714.566	27.183	7.407	2.816	1.742	0	0	3.306	0	0.073	2.283	1.042	2.593	0.617	0	5.307	6.61	2.016	3.09	0	0.014	0	51.727	2.313	1.193	1.771	0	0	517.668	914.532	7.287	25.125	-13.5212	24.7212
513	180285	55	1038.74	1067.81	1188.77	54.659	30.884	5.642	4.128	0	0	0	3.93	3.104	11.869	40.459	31.725	0	0	10.13	5.823	0	0	0.267	36.185	0.941	118.935	13.577	2.698	0	2.84	5.922	914.19	1707.64	47.437	45.733	2.20562	25.2376
514	180408	40	1549.16	1466.13	1681.12	104.508	35.817	11.923	6.843	0	0	8.596	13.059	11.453	17.377	92.264	5.636	12.212	0	35.979	15.804	17.152	7.034	3.339	36.397	8.128	243.331	16.627	10.723	0.851	30.261	80.632	1892.14	3417.79	16.875	49.646	12.4341	5.85823
515	181198	37	1155.88	1090.65	1258.58	66.253	24.358	6.622	0.719	0	0.587	5.247	3.443	23.993	11.994	17.087	15.164	0	0	26.472	7.971	0	3.384	6.086	23.994	0	222.514	15.046	5.187	0.272	36.703	6.97	1255.23	2280	41.675	51.718	9.86177	19.89
516	181497	44	3050.52	3029.93	3344.26	135.011	27.445	22.727	9.59	0	0	0	0.694	35.932	16.949	111.185	22.103	28.845	1.31	77.946	20.249	11.763	0.75	52.068	84.255	4.625	730.173	53.044	8.071	15.104	154.397	250.897	4154.72	7605.83	25.493	27.441	26.9424	-0.466808
517	181585	38	631.298	697.343	824.72	47.675	19.838	5.152	3.636	0	0	0	0.642	15.097	3.488	24.554	5.295	5.288	0	7.964	2.603	1.927	0	7.034	10.846	0	68.791	3.602	1.665	0	5.776	0.511	677.388	1171.06	25.777	35.118	-7.10659	15.4071
518	182374	49	3461.43	3354.51	3549.06	218.632	74.064	24.211	28.64	0	0	24.571	14.176	74.023	29.933	305.901	29.592	14.599	5.086	91.603	44.286	16.552	5.672	59.272	68.673	9.28	1138.23	43.051	9.326	48.659	154.312	186.839	6633	11976.3	28.013	64.831	25.6137	-6.16087
519	182628	89	3070.75	3133.68	3461.25	144.25	63.728	41.52	7.635	0	0	56.525	15.976	39.457	24.092	79.014	9.056	9.122	0.731	30.464	24.83	29.559	7.259	0	91.639	2.18	390.178	42.591	14.565	1.751	33.714	18.599	3752.28	6504.69	85.223	107.74	17.4254	0.445969
520	182700	32	4072.53	3965.78	4295.44	193.993	49.151	28.256	0.155	0	0	0	2.694	33.722	0	94.289	14.067	4.832	0.02	62.6	14.462	152.22	8.097	13.106	56.392	1.36	676.885	46.249	4.612	0	20.192	17.986	4116.21	7759.58	36.804	78.26	19.8663	-8.41894
521	183107	44	825.318	803.946	816.323	62.55	33.139	8.62	54.417	0	0	7.141	6.517	34.104	29.311	134.372	52.114	5.744	0.622	55.137	46.481	9.941	3.577	59.758	57.976	15.797	811.985	70.673	21.4	14.469	51.382	217.031	3510.28	6254.36	5.994	111.916	26.777	0.210401
522	183165	34	1173.53	1184.94	1417.19	56.644	12.819	10.202	7.441	0	0	5.612	2.499	14.578	2.259	84.683	1.473	3.694	0	26.751	40.807	1.209	0	2.978	84.324	0	312.545	40.647	19.839	0	29.389	6.809	1894.16	3471.34	2.075	45.593	22.6213	16.3177
523	183411	47	1951.19	1966.93	2235.98	141.653	52.293	34.447	6.595	1.275	0	2.959	4.002	39.522	31.263	110.286	15.497	14.709	0	54.37	13.119	1.487	12.784	43.353	91.788	0	578.709	61.107	6.599	8.255	192.862	62.863	3681.14	6801.98	38.296	79.187	29.3073	9.48363
524	183514	33	1299.45	1436.28	1433.88	54.863	17.625	8.165	0	0	0	44.657	0	44.854	2.042	10.227	2.287	0	0	12.736	0	42.92	7.107	8.932	0	0	92.846	1.436	2.859	0	15.392	0	872.765	1741.02	69.647	45.546	-7.69533	9.47928
525	184143	37	1861.49	1946.99	1923.44	130.173	36.767	16.944	8.761	0	0.701	1.995	9.625	20.091	25.913	82.156	4.602	3.969	0.461	41.042	14.234	35.003	7.292	22.526	66.287	6.302	389.735	23.138	8.664	4.761	9.412	118.391	2500.28	4552.68	4.932	60.864	15.9906	1.30861
526	184250	63	3071.17	2908.68	3410.48	162.021	32.837	35.004	13.208	1.229	0	0	8.912	23.098	15.054	102.66	9.08	11.985	0	36.679	33.447	27.582	15.928	16.975	75.859	2.141	601.83	60.403	7.801	8.906	38.334	38.356	4741.26	7694.34	65.573	103.436	21.4035	-0.815234
527	184645	50	1431.58	1511.23	1548.35	63.797	24.103	18.212	0	1.292	0	2.454	6.485	25.933	4.663	28.944	1.922	0.111	0	33.639	13.113	0.169	0	8.554	47.223	0	301.091	19.927	2.677	5.941	9.656	3.958	1423.34	2734.87	10.671	79.501	14.5833	20.8193
528	185429	39	3623.91	3763.36	4365.48	147.064	35.904	19.67	3.93	0	0	14.459	6.996	15.293	7.524	29.11	3.322	2.413	0	58.854	5.204	0	0.6	3.035	88.314	8.493	465.522	31.832	11.709	2.173	9.142	14.564	2770.64	5000.21	49.763	49.105	23.1764	18.8824
529	186135	32	1779.4	1912.13	2096.31	89.105	37.145	5.324	2.122	0	0	1.076	5.201	16.185	2.996	64.041	20.338	13.316	0	28.569	2.478	17.966	6.853	7.434	26.95	1.253	219.187	14.408	0.664	2.191	4.761	3.306	2137.97	3679.44	62.488	4.526	11.8531	5.74552
530	186200	53	1921.6	1788.04	2025.42	121.802	33.117	20.43	21.804	0	0	11.556	28.376	34.801	29.177	179.916	31.196	12.189	2.256	62.797	38.206	20.121	13.027	22.544	41.892	5.744	510.866	34.889	14.973	19.359	54.296	18.778	3083.79	5371.14	30.2	132.113	21.3311	-1.0612
531	186406	58	1509.12	1530.15	1671.31	60.345	33.263	10.023	1.202	0	0	0	0.019	34.789	3.755	12.331	11.462	8.294	0	42.426	2.619	7.596	0	9.641	69.636	8.714	260.024	19.331	0	0	17.313	1.341	1106.96	2017.35	22.015	61.184	13.3775	11.0229
532	187041	31	916.391	766.453	1011.38	53.858	6.899	0	1.844	0	0	0	0	9.15	0.476	14.254	4.554	0	0	0.557	0	1.705	1.737	3.32	15.67	0	87.529	2.839	1.064	0	13.018	8.705	948.225	1801.21	9.043	36.314	-8.35348	17.7621
533	187286	46	1652.16	1691.94	1863.46	75.001	28.715	23.746	11.133	0.041	0	0	2.598	10.267	10.465	46.282	12.046	4.864	2.349	29.734	4.234	1.48	1.727	4.137	42.921	2.752	286.726	15.837	7.394	9.145	12.004	10.493	2262.11	4029.9	19.155	79.713	13.5264	23.6409
534	187547	64	2600.08	2697.87	3065.95	127.36	53.356	14.839	17.998	0	0	0	20.698	55.866	27.779	168.755	32.45	14.249	5.397	51.343	24.057	1.69	7.515	21.044	50.596	5.339	427.435	22.873	11.182	15.795	32.914	9.325	4113.89	7138.31	68.143	70.381	24.8281	13.3545
535	187584	52	1803.63	1780.57	1996.96	90.766	20.088	13.858	7.926	0	1.864	7.159	8.228	35.527	11.874	126.464	7.169	3.238	0	41.767	14.192	0.808	0	20.594	59.74	24.815	344.63	10.374	6.574	12.594	33.145	22.05	1668.14	2755.59	3.854	103.518	24.5726	13.9327
536	187683	51	4416.48	4457.25	4918.07	122.919	44.506	23.629	27.582	0	0	7.921	13.831	26.069	13.439	95.719	8.16	14.501	2.63	70.853	34.953	5.333	4.753	13.584	103.003	0.586	945.994	69.591	16.814	13.998	106.962	80.322	4257.1	7689.5	26.047	84.794	28.2169	7.14731
537	187720	34	2972.63	2831.93	3251.22	129.194	59.101	23.551	12.583	0	0	6.182	7.79	34.347	23.631	180.369	16.551	6.558	0.241	47.807	19.227	9.517	8.907	22.431	41.691	10.361	687.017	35.61	20.53	10.847	37.919	176.612	4513.17	7947.42	18.423	35.991	21.5295	0.966749
538	188145	56	3478.83	3687.36	4094.42	203.387	44.346	22.091	12.755	0	2.005	0	7.424	30.962	17.863	150.541	7.749	22.659	0.103	51.357	15.589	19.895	5.721	9.829	56.773	8.124	752.708	32.577	7.932	15.373	50.65	93.37	5055.9	8672.62	10.959	47.405	21.8281	0.940232
539	188293	38	2654.55	3016	2945.41	134.377	37.511	18.802	10.922	0	0	0	17.505	34.95	9.561	65.321	5.057	10.966	0.899	36.922	13.865	9.335	0	0.608	88.954	0	525.832	42.005	12.784	1.358	11.009	8.457	2878.09	4859.96	36.221	68.406	22.7988	8.35888
540	189272	37	2159.83	1991.56	2273.83	85.441	23.463	8.537	4.845	0	0	0	2.997	16.314	22.127	44.276	19.721	3.061	0.776	47.019	7.218	16.824	2.726	12.919	41.69	5.118	361.095	26.119	13.818	5.738	54.942	15.451	2621.44	4636.22	20.215	43.055	13.5988	6.93561
541	190275	40	1352.4	1267.67	1446.79	65.043	38.745	11.012	3.411	3.187	0	31.711	4.83	9.437	3.669	28.878	5.323	2.243	0	50.404	2.893	0.336	1.326	9.967	42.949	0	137.404	22.721	0	1.167	0	0	1484.13	2545.82	10.454	64.629	10.3565	24.8217
542	190652	35	3082.69	3161.36	3419.71	108.356	31.553	11.382	8.219	0	1.641	17.112	12.618	40.574	33.192	234.976	22.608	12.981	2.021	45.175	37.553	22.297	13.395	31.336	73.82	12.027	670.109	21.126	23.008	9.47	60.376	239.651	5004.54	9061.89	18.388	65.538	21.3954	-3.06006
543	190659	78	5470.63	5476.09	6238.06	298.958	57.616	45.599	1.16	1.686	0	39.2	7.446	76.188	6.986	1713.27	6.786	0.725	0	11.976	6.5	73.813	0	2.562	11.682	0	319.286	9.008	0	4.793	7.517	3.431	2082.65	3739.76	11.764	70.197	-6.00425	0.40646
544	190889	53	865.944	819.324	1019.57	43.697	30.045	1.28	0	0	0	0	5.265	16.394	11.497	37.538	7.923	7.81	0	11.508	21.579	9.162	0	2.664	20.896	10.635	94.241	13.73	0	0.11	1.099	7.889	886.263	1768.92	54.357	55.668	5.87513	12.7372
545	191162	74	1271.52	1319.36	1615.32	76.644	33.453	16.58	5.231	0	6.35	6.364	2.748	27.13	0.998	44.513	0.052	4.934	0.336	26.066	16.568	0.83	4.263	2.099	64.264	4.296	272.485	15.667	9.133	8.417	28.323	13.598	1987.84	3151.01	67.62	55.708	17.8701	17.3916
546	191716	49	7968.41	8127.1	9020.45	313.071	78.431	51.794	0.667	3.062	0	30.338	4.152	9.714	0.417	28.387	3.918	5.158	0	58.646	8.742	8.994	9.745	5.141	10.289	0	270.103	10.791	0.209	4.043	1.319	9.647	3010.33	5354.61	11.135	23.733	4.26343	11.2637
547	192447	29	573.392	631.77	733.094	40.329	22.38	0	1.261	0	0	0	0	0.619	9.562	16.626	14.014	8.659	1.472	2.874	0.286	4.406	4.107	9.518	0.494	0	100.949	7.55	5.245	1.242	7.093	0.294	702.311	1448.66	6.755	48.142	-10.8728	22.9277
548	193210	74	3214.98	3176.02	3366.93	151.551	45.93	20.066	7.881	0.065	0	49.484	3.837	10.744	11.419	618.959	8.6	4.239	0	19.115	0.999	0	6.581	0.874	20.082	0.562	457.842	27.346	0	1.803	14.209	9.71	1296.63	2496.07	59.155	93.097	14.295	-3.9489
549	193275	41	1154.77	1151.97	1348.62	50.902	33.96	9.954	13.298	0	1.922	4.438	11.065	18.227	15.213	35.079	3.453	7.807	1.643	17.813	13.704	0	0	4.826	46.968	5.035	293.251	16.393	0.582	0	0.437	45.877	1580.65	2808.68	14.918	74.666	12.7038	20.3699
550	193526	37	5022.38	5399.31	5999.76	293.983	31.476	24.9	0	0	0	23.891	0	567.271	7.609	28.465	1.919	6.566	0	67.234	4.583	40.51	13.356	6.503	12.115	0	324.994	3.24	1.156	1.293	2.543	3.506	2885.19	5373.81	7.921	37.144	-13.5771	7.48066
551	193573	53	3034.94	3032.8	3353.77	136.337	67.428	14.371	0.569	0.969	1.583	11.453	3.168	247.964	12.284	34.817	1.386	4.022	0	4.778	2.792	5.114	1.856	19.992	22.866	0.514	94.074	4.647	1.907	1.751	0.067	56.249	1006.71	1704.17	8.918	16.272	-24.503	11.8048
552	194380	50	2474.8	2589.22	2806.25	121.878	22.812	17.638	4.505	0	0	3.594	4.928	18.502	6.417	64.813	7.456	8.55	4.85	30.263	14.702	46.365	5.853	4.911	47.164	3.126	387.866	30.526	5.727	7.64	30.017	2.001	2576.05	4776.06	26.029	79.316	15.0165	1.20449
553	195725	54	564.039	517.454	616.184	32.514	13.649	14.42	0	0	0	2.751	8.482	4.406	10.157	36.306	6.123	10.037	0	5.922	4.303	5.431	0.838	0.08	18.663	0	134.99	12.875	9.588	1.088	23.865	26.366	656.521	1160.03	12.943	54.317	0.667745	24.6519
554	196013	48	877.71	925.163	1032.8	54.646	11.55	11.066	3.445	0	0	10.678	0	7.001	1.452	27.276	8.172	2.359	0	16.53	8.458	0	0.028	5.529	4.303	0	173.521	7.858	8.716	7.13	21.489	15.63	1548.87	2647.46	23.848	53.957	-3.70039	19.5874
555	196086	38	1521.5	1560.29	1878.8	80.451	34.084	9.151	4.553	0	0.558	0	8.641	8.588	3.89	46.099	3.509	3.503	3.801	11.996	13.515	109.98	0.885	8.775	44.512	5.026	289.316	15.204	0	2.278	19.621	23.454	2036.07	3423.9	22.333	35.796	-5.41776	5.52894
556	196190	39	1726.12	1701.72	1958.44	101.864	32.562	26.415	31.285	0	0	43.779	40.672	74.407	60.551	236.068	27.914	12.195	0	59.395	50.004	17.61	16.929	28.293	118.314	14.772	876.513	84.694	20.25	20.524	73.661	34.88	4857.6	8666.87	17.571	50.458	27.1195	-4.65791
557	197193	49	2836.02	2828.32	3393.35	125.963	63.451	26.31	5.805	0	1.72	0	6.361	18.441	7.903	96.721	11.002	12.62	5.166	100.437	20.998	0	0	16.191	100.955	0.021	597.829	38.827	2.208	0	19.288	28.698	3907.55	6974.44	28.54	92.836	28.3447	11.4514
558	197194	41	2184.62	2210.81	2510.57	110.324	35.62	28.549	7.237	6.466	0	43.212	0.348	4.136	9.071	16.657	2.628	0	0	3.018	11.036	0	21.246	1.943	11.936	0.625	219.405	14.757	0	3.401	0.71	19.109	1479.96	2829.64	4.504	46.881	-4.29141	26.0089
559	197238	28	3686.66	3698.79	4340.89	114.844	23.334	11.073	0	0	0	23.366	1.731	1.691	0.659	389.064	0	0.193	0	11.506	0	14.321	3.489	26.727	9.852	0.706	417.947	11.232	0	2.044	0	9.179	1783.46	3284.82	0.84	31.048	2.17169	1.79215
560	198532	34	758.405	687.002	737.441	31.219	8.125	4.255	7.588	0	12	2.925	9.709	10.933	20.703	56.801	14.524	0	3.087	7.45	14.739	3.819	0	19.787	4.879	0	73.227	6.371	0	9.262	37.273	11.274	726.717	1295.08	2.834	61.111	-2.69759	12.1282
561	198659	37	3964.48	4353.06	4325.95	145.659	29.017	20.193	1.426	0	0	5.224	0.262	5.729	3.676	608.938	3.683	0.582	0	3.69	0	6.378	5.438	9.285	8.57	15.437	1618.92	7.484	0.41	0	6.154	9.044	1488.43	2874.29	9.368	21.583	15.127	-11.417
562	200064	36	2636.44	2797.91	3448.97	135.409	52.235	39.967	4.128	0	0	33.825	8.549	47.71	12.868	93.911	28.089	6.35	0	23.802	181.792	1.773	7.722	19.32	43.351	4.025	235.364	16.005	4.005	0.266	20.71	113.434	2296.95	4116.63	12.509	81.672	16.513	12.4385
563	200095	48	608.404	639.106	663.522	22.448	14.497	5.906	0	0	0	0	2.168	12.606	5.006	7.625	2.462	0	0	13.49	3.954	3.269	0.463	0	8.583	0.74	77.993	4.736	1.625	0	29.544	8.919	641.614	1209.36	31.252	42.829	-7.14753	17.0891
564	200794	34	4604.14	4675.07	5483.89	283.959	36.381	25.539	0	6.231	0	17.874	1.372	491.264	7.484	8.189	0.621	2.164	0	13.088	4.327	0	1.626	0	0.002	0	61.862	17.88	0	0	0	0	2385.61	4121.29	1.974	40.36	-24.282	16.3263
565	201259	39	492.939	584.632	684.018	22.318	25.442	1.586	0.263	5.057	0	2.769	3.853	0.987	11.966	25.357	6.466	3.225	0	11.999	4.688	1.215	0	0	0.502	16.679	47.522	4.484	6.912	2.701	0.337	11.055	584.904	1013.59	0	34.265	-11.1048	21.6116
566	201720	38	1615.41	1777.15	1816.54	86.935	22.566	11.249	13.459	0	0	0	4.409	23.748	11.04	99.978	7.539	9.748	0.527	40.197	20.119	6.455	4.451	3.947	55.191	13.8	450.726	21.057	11.475	5.245	50.446	23.079	3271.77	6076.56	19.865	116.217	19.2621	5.04235
567	203507	41	1117.22	1089.36	1129.48	51.701	15.165	3.762	9.67	2.639	0	3.714	14.508	28.284	15.429	44.082	41.231	9.684	0	26.969	0	2.776	13.737	12.954	28.95	9.616	193.65	6.419	3.282	6.361	12.097	15.376	1638.96	2744.85	10.66	37.683	9.27096	17.1736
568	204452	30	1706.45	1650.29	2073.47	72.556	40.08	18.322	3.748	0.345	0	51.693	0	5.855	9.147	10.194	8.096	0	1.879	11.12	6.743	4.801	0.205	0	9.04	0	9.711	3.112	0	0	2.53	3.85	1425.82	2532.92	8.268	22.653	-15.1377	23.2016
569	204771	46	743.641	786.945	866.787	47.746	6.422	1.494	0.227	0	0	0	12.774	5.898	0	10.659	0.316	0	0	12.799	0	0	2.445	0	4.613	2.793	94.771	0	0	0	1.485	0	689.87	1163.6	12.211	26.086	-9.55277	20.8461
570	205151	30	1044.35	984.903	1215.15	46.988	26.576	13.061	1.514	0	0	0	1.343	31.274	35.974	111.288	19.579	7.525	4.201	35.623	17.679	2.674	1.674	3.957	24.859	6.377	158.418	12.515	3.704	11.313	15.216	17.1	2026.31	3469.13	7.286	55.6	12.274	16.9684
571	205253	28	2488.01	2668.79	2964.01	102.065	29.026	23.855	2.335	0	0	52.259	2.082	18.211	2.609	33.695	2.559	6.368	0	18.178	0	10.114	0	2.295	2.259	0	16.708	0	0	0	0	0	1453.09	2519.99	5.807	59.063	-7.27043	11.461
572	206078	45	736.797	618.783	682.574	31.907	16.713	7.149	3.652	3.417	0	0.024	3.161	14.136	7.015	19.94	5.666	4.628	2.883	10.258	1.885	0	0	2.061	15.303	0	120.225	1.034	0	5.122	0	22.66	722.935	1214.48	27.643	19.484	-6.04689	15.1296
573	206154	44	884.863	1007.32	986.233	48.622	21.207	7.216	4.43	0	0.302	12.492	8.004	23.142	6.812	67.525	7.756	1.051	3.412	21.906	6.375	0	0	10.982	10.058	0	190.006	15.126	0	0.249	9.614	12.138	1025.73	1528.4	13.984	69.933	7.57614	18.0296
574	206229	53	1788.13	1886.64	2030.83	110.126	57.151	12.858	1.629	0.506	0	0	8.524	7.724	4.518	86.9	2.46	10.763	3.297	46.173	30.637	3.562	1.312	14.375	54.299	5.023	299.238	13.135	14.994	0.428	24.317	6.954	3037.33	5175.54	17.117	37.418	16.6664	23.5673
575	206490	49	2260.63	2348.99	2396.01	104.124	52.076	24.782	0.232	0	0	58.166	5.962	11.552	10.77	29.194	0.727	0	0	4.383	0	1.108	46.133	3.254	15.692	4.904	198.638	9.753	1.85	0	2.53	42.275	1596.38	2744.5	6.754	68.085	0.11184	19.6186
576	207176	74	5691.02	5637.33	6515.44	224.725	60.808	39.464	1.879	0	0	38.284	1.582	304.38	11.894	16.07	0.383	4.961	0	40.716	4.033	2.4	1.686	5.11	53.391	2.04	147.184	0	1.507	5.464	15.454	8.05	1516.57	2794.33	18.734	53.679	-14.8727	12.7605
577	207446	28	1278	1336.6	1497.99	34.194	18.308	12.546	1.269	2.122	0	8.704	1.654	26.025	5.531	20.594	3.335	0	0	23.18	0.916	5.559	0	1.99	27.938	2.983	253.296	14.884	0	0	10.64	1.353	1497.13	2921.47	10.522	31.445	7.50264	15.6071
578	207850	48	2626.08	2549.22	2801.26	167.116	97.455	38.525	11.135	0	1.586	4.957	7.425	42.22	31.892	162.127	118.785	49.533	0	59.941	87.468	16.366	8.961	515.853	81.841	16.91	960.183	51.551	15.084	13.522	607.601	545.243	5696.71	10111.2	46.44	49.651	23.5223	-0.482036
579	208314	44	2841.18	2671.01	3051.47	144.027	15.748	19.683	13.584	0	0	0	15.121	39.136	79.622	144.625	12.018	7.883	8.376	65.659	30.615	12.69	15.831	16.683	126.489	5.21	848.743	67.207	17.961	4.067	34.656	139.789	4468	7363.41	29.207	341.101	28.0357	-1.59354
580	208815	88	1430.53	1563.3	1573.51	71.089	28.209	23.16	16.997	0	0	11.329	2.836	27.602	11.961	84.626	3.261	8.755	1.495	32.561	40.715	0	4.629	26.42	42.5	5.043	347.13	39.445	9.007	0	36.17	154.906	2305.58	4232.39	28.4	82.113	22.4624	15.6534
581	209167	48	185.294	179.399	243.064	19.032	9.414	7.539	8.541	0	0	13.235	3.215	2.298	3.388	52.343	6.14	0	0	12.02	0	1.209	0	0	5.932	1.671	155.397	7.628	8.657	0.88	0.39	0.023	1076.21	1988.5	13.094	22.971	-7.27982	21.8268
582	209270	44	1361.95	1381.36	1578.66	61.103	22.304	18.441	21.179	0	0.619	0	15.473	28.866	11.122	67.243	10.381	2.39	12.363	51.143	16.291	0	2.589	10.918	60.106	10.888	288.052	35.933	10.862	11.496	29.347	47.683	2773.4	5445.28	5.954	52.89	22.2275	17.5189
583	209300	33	535.284	619.573	687.167	40.791	10.8	6.816	9.941	0	0	0	1.137	2.38	5.951	13.33	4.867	0	0	4.178	11.851	0.701	0	4.644	19.504	0	117.676	2.509	0	2.183	2.716	18.486	1209.56	2061.26	7.022	31.62	-5.27275	28.0199
584	209507	35	1621.47	1563.35	2066.84	85.041	26.501	30.865	29.037	0.9	0	0	7.701	22.194	2.313	91.485	7.297	4.493	0.897	72.303	26.769	1.863	8.586	39.308	126.581	11.41	844.625	93.956	10.94	9.558	62.045	543.881	4718.05	8507.5	22.288	50.495	29.7358	7.99467
585	209758	81	2597.18	2867.33	3087.97	138.95	52.662	31.913	15.23	0	0	8.635	15.335	26.994	22.776	100.47	13.009	20.363	0	75.436	53.068	16.911	6.39	18.268	62.167	0	565.044	33.113	18.511	12.977	56.357	129.483	3524.64	6042.58	28.657	94.75	22.1555	2.02943
586	209774	26	793.387	776.176	950.241	35.024	11.212	17.146	5.579	0	0	4.069	0	9.791	3.301	35.554	9.75	0	0	4.183	9.043	1.473	0	1.18	11.867	6.874	126.34	6.831	4.789	4.968	9.438	0	654.015	1053.39	3.388	46.53	-4.97777	18.2528
587	209999	35	1182.26	1205.06	1396.15	55.208	15.81	7.948	0.097	0	0	12.059	4.463	8.282	0.943	17.514	8.342	5.834	0	17.17	17.573	0.676	0	0.388	12.067	0	170.1	11.761	2.903	0	13.607	11.292	868.194	1554.52	25.865	35.631	-1.70434	18.4935
588	210863	50	1521.77	1615.03	1749.79	67.07	21.599	11.835	4.348	0	0	0	17.047	33.621	6.301	95.044	18.653	5.263	0	21.752	12.652	0	0.685	14.546	27.637	0	213.37	3.033	1.756	7.586	20.323	140.996	1972.94	3607.38	19.537	28.34	10.3447	17.1069
589	210915	36	2973.23	2935.91	3076.53	146.657	29.869	6.5	30.061	0.341	0	15.76	8.734	36.856	14.965	125.188	27.762	7.537	0	30.217	12.701	7.497	6.479	57.718	24.542	7.612	668.653	43.909	13.829	3.976	136.801	172.063	4867.11	8762.65	16.05	71.859	18.2741	3.85634
590	211119	34	1411.46	1378.81	1520.2	69.551	31.208	11.068	10.801	0	0	0	10.236	25.458	11.34	85.975	11.734	8.233	0	33.321	18.14	2.454	5.44	14.532	79.41	0.326	371.888	45.741	6.304	20.929	52.485	28.706	2329.72	4854.15	36.013	76.567	23.3152	12.6813
591	211962	31	1769.88	1794.99	2074.32	77.542	16.533	6.459	6.879	0	0	10.398	27.846	64.813	31.421	231.629	29.39	5.563	0	58.785	42.663	24.249	5.541	22.276	39.723	0.746	503.023	42.838	30.216	39.192	29.278	54.256	3732.18	6492.01	13.647	59.171	21.5224	-3.5167
592	212874	31	619.32	566.811	724.002	46.28	7.383	2.092	4.97	0.526	0	0	3.074	1.603	2.036	7.513	1.921	7.038	0	14.734	9.227	0	0	0	16.785	0	71.83	7.752	0	7.139	0	0	597.317	1040.64	26.685	27.699	-5.23845	30.0828
593	214028	30	2354.93	2180.69	2629.58	116.262	36.366	22.432	16.028	1.783	0	6.689	13.152	34.259	17.569	158.98	8.345	4.564	0	44.764	23.371	9.694	12.4	15.632	43.221	2.204	396.307	36.952	12.542	15.01	34.169	388.409	3999.93	7657.23	19.436	53.496	20.5266	1.66997
594	214032	42	916.136	1048.63	1030.07	50.135	19.613	4.682	0	0	0	38.469	3.152	22.316	11.485	35.898	7.954	3.148	3.335	10.109	5.467	4.632	8.034	3.306	15.748	4.319	107.819	11.39	0	2.36	11.518	9.512	807.065	1507.91	79.449	120.631	5.82009	15.0327
595	214632	68	2543.3	2748.91	2973.24	156.702	38.72	35.035	9.936	0	1.649	5.491	20.591	21.285	1.156	76.431	9.194	28.73	0	60.775	34.709	2.546	5.546	65.956	80.106	10.725	446.886	33.017	7.83	10.114	105.14	58.572	4310.56	7513.58	50.503	99.268	23.2535	11.5894
596	215568	45	2127.97	2109.4	2228.34	122.809	54.382	35.099	0	0	0	71.557	3.136	11.965	6.676	84.089	10.063	0	0	12.185	15.326	0	32.806	7.064	15.119	0	159.221	12.795	6.912	4.802	5.536	64.212	1801.43	3233.37	7.602	47.35	5.2632	20.5182
597	216407	44	1099.74	1214.02	1338.31	55.942	16.816	13.722	13.352	0	0	0.272	4.707	18.89	12.893	36.405	7.703	1.799	1.307	27.493	0.524	4.972	0.763	12.96	20.051	2.754	197.875	6.349	6.578	13.109	4.446	11.219	1243	2311.69	9.939	44.009	7.82173	16.2613
598	217807	43	1414.92	1238.21	1509.41	55.154	20.868	7.701	0	0	0	25.48	1.913	25.284	6.754	55.89	4.625	6.178	0.414	23.142	16.772	0	5.489	0	15.318	0	237.105	22.425	5.19	4.502	44.876	19.375	1593.42	2877.68	2.097	72.21	13.7275	18.3204
599	217812	34	2468.01	2524.54	2895.5	108.159	49.719	14.894	11.35	0	0	9.039	13.071	37.441	18.75	185.46	26.219	13.838	0	58.68	11.868	8.684	7.186	16.673	71.278	0	317.041	44.295	11.437	11.417	113.975	65.767	3642.32	6747.63	27.416	60.824	23.6863	5.6121
600	218255	36	2449.53	2368.67	2831.4	90.601	19.993	13.383	12.385	0	0	0	20.36	14.687	10.897	73.212	22.303	23.831	1.057	57.206	17.4	3.79	2.075	8.641	26.313	0	516.226	23.591	8.25	0	30.993	35.455	2875.96	5073.03	22.666	78.341	18.8822	6.79754
601	218390	51	428.471	425.589	404.937	16.142	21.395	19.095	11.29	0	0	3.139	7.115	28.966	14.086	46.035	19.963	0	0	8.793	23.191	8.622	0.059	37.81	15.504	3.424	203.731	19.943	0	0.679	115.587	243.528	1059.82	1871.48	32.153	39.692	7.09171	13.3243
602	218435	45	804.144	905.371	1066.29	50.396	36.683	11.548	16.66	0	0	1.574	8.112	22.051	10.633	63.777	5.27	0	0	20.931	0	0.284	0	14.898	15.126	4.559	161.324	18.102	4.91	10.218	9.793	13.932	1946.21	3761.4	23.037	52.109	7.60311	18.0739
603	218911	31	2427.27	2569.9	2602.26	141.994	43.787	15.211	7.997	0	0	0.767	5.301	18.067	3.568	50.291	8.847	12.751	0	19.41	27.402	5.635	3.565	0	33.598	0.906	372.104	27.589	13.235	5.367	14.868	10.441	2969.78	5348.94	37.311	40.504	14.5813	13.884
604	219799	52	3947.94	3937.47	4263.9	135.646	46.058	21.217	0.871	0	1.431	32.506	0.013	198.294	0.031	19.548	7.457	3.628	0	12.352	0.152	0	1.995	3.917	0	2.909	40.021	3.582	2.138	0	2.416	1.343	1578.77	2559.55	19.648	24.72	-22.3533	17.09
605	220547	28	1357.79	1379.63	1618.15	66.751	5.119	1.88	3.076	4.771	0	0	1.262	8.029	3.385	21.944	4.295	9.467	0	22.281	0.636	1.155	0	0.082	33.943	0	207.606	20.736	2.299	0	11.929	0	1356.52	2437.66	7.034	59.107	8.0742	25.3244
606	221112	36	1068.24	1110.76	1257.69	51.149	9.916	4.367	3.517	0	0	39.738	2.597	3.563	13.033	68.144	0	0	0	0.585	3.746	14.981	0	2.867	19.251	0	83.826	0	0	0	13.289	0	938.014	1790.5	82.163	81.02	-2.90902	8.95052
607	221917	31	2308.6	2426.12	2695.87	76.796	28.801	4.52	6.371	0	0.691	0	1.946	6.649	2.36	17.616	0	10.237	2.031	22.301	10.219	0	1.381	0.636	37	2.909	310.236	16.427	0	2.375	14.195	7.916	1690.03	3131.15	22.316	42.565	8.02114	26.0804
608	222910	46	1982.14	2137.19	2234.46	108.263	53.12	14.791	1.365	1.779	0	12	6.406	6.488	1.814	75.223	11.795	0	0	13.899	2.211	5.295	4.939	0	11.18	0.383	94.91	5.623	3.537	0.52	16.066	31.851	981.289	1689.94	0.61	76.515	-1.83041	11.8743
609	223233	44	1634.43	1808.56	1976.68	66.195	19.339	7.42	12.031	0	0	0	18.491	37.284	30.355	263.353	30.469	21.652	1.706	29.659	10.997	23.908	1.332	30.695	17.474	0	261.646	15.849	15.087	17	29.318	55.184	2151.18	3691.66	22.462	58.381	17.359	-2.83894
610	223582	36	651.885	621.226	699.895	38.969	5.484	10.883	2.962	0	0	0	0	12.332	5.324	34.803	10.278	0	0	10.822	0	2.171	0	10.84	10.139	6.927	106.327	22.414	5.331	4.405	10.969	2.135	850.609	1633.08	1.746	53.448	-0.939173	19.1148
611	223762	44	1521.29	1421.64	1639.58	58.964	18.902	17.615	0	0	0	82.258	4.67	0	9.307	110.837	1.775	0	0	8.072	0.917	4.916	1.659	0.399	6.978	2.869	109.179	13.878	8.165	0.371	0	0	776.316	1420.11	70.719	76.491	0.477946	7.49567
612	223773	43	2400.64	2606.46	2704.64	147.675	42.281	25.093	13.197	0.24	0	13.082	8.366	22.348	6.526	82.117	42.232	8.768	0.726	46.486	37.221	7.934	1.257	131.043	46.678	3.836	666.557	47.166	25.373	5.658	184.807	191.398	3144.15	5722.5	8.744	50.433	21.7257	4.4012
613	224323	42	1888.85	2056.24	1988.28	89.674	47.576	21.462	19.151	0	0	0	7.301	13.207	10.504	70.102	27.695	3.95	6.402	41.001	6.724	5.22	0	8.35	35.225	0	426.964	30.306	4.805	2.651	41.439	9.972	3811.97	6997.47	23.796	54.89	19.1242	6.59748
614	224914	34	1052.18	1133.73	1177.03	77.658	9.849	0.7	3.333	0	0	0	5.263	2.815	2.384	37.722	0	7.893	0	8.474	1.307	0	0	5.56	17.047	2.656	98.116	0	0	0	12.791	0	782.003	1336.73	0.711	29.536	-6.39033	24.9125
615	225210	32	3250.77	3444.67	3815.67	157.732	22.631	21.912	0	0	0	21.833	2.116	3.375	1.199	352.262	1.159	0	0	8.194	10.428	127.912	24.705	5.282	29.339	1.442	1426.88	0	0	0	5.558	31.402	1679.38	2862.64	14.35	24.841	-4.35691	-6.22522
616	225232	35	657.03	621.53	689.009	40.696	8.415	0.11	2.213	0	0	2.233	0	8.034	5.394	7.857	3.313	0	0	0	2.354	0	0	7.851	13.261	0	50.283	0	0	1.393	27.364	10.231	741.785	1143.52	18.96	124.094	-11.3752	26.0609
617	225506	69	1994.41	1874.71	2346.75	93.1	32.653	10.629	0.482	0	1.808	50.355	8.656	161.525	2.159	23.003	2.479	13.552	1.209	3.009	5.744	26.634	5.267	15.374	14.205	0	92.649	0	0	1.328	2.468	5.722	975.852	1785.75	6.504	52.879	-19.6323	10.1009
618	225638	37	1710.98	1778.51	1980.5	96.735	38.915	16.931	24.531	0	0.99	2.194	3.022	27.586	5.315	89.557	7.292	4.84	0	28.606	19.579	12.222	9.06	45.314	49.494	0	511.918	18.723	2.578	0	84.843	129.431	2920.68	5380.42	40.439	47.219	18.35	3.97801
619	225761	41	1346.13	1416.9	1608.63	88.738	34.405	26.242	11.99	1.384	0	3.856	8.407	19.997	11.081	53.477	0.798	1.163	0	38.42	25.095	5.944	0	10.749	79.218	0	269.36	51.567	0	4.565	76.165	115.69	2839.75	5144.47	18.436	66.583	21.3684	10.6835
620	226243	42	3326.05	3379.71	3725.61	170.145	36.983	12.39	0	1.955	0	20.823	1.022	7.069	6.835	575.18	0.421	0	0	5.281	2.549	39.429	0.583	2.337	11.675	0	144.937	0.863	2.48	5.282	7.771	29.348	1542.17	2139.28	9.356	43.16	-2.77068	1.28131
621	226382	28	657.889	603.545	720.581	33.796	6.088	11.254	13.627	0	0	0	7.032	12.35	2.227	41.486	0	3.331	0	40.494	22.453	0	0	0.768	34.186	0.253	189.914	4.852	11.758	1.982	21.861	40.39	1641.23	2793.6	35.425	73.15	9.4781	18.7253
622	226518	60	1621.15	1496.91	1726.36	90.012	38.832	24.012	5.146	0	0	3.564	4.484	5.24	9.702	14.919	4.209	4.621	0	26.741	4.955	5.857	8.975	6.045	20.889	5.076	204.601	20.317	8.205	0	6.516	20.879	1592.24	2727.2	19.254	59.609	6.39715	26.7901
623	226733	35	1760.62	1774.29	1964.43	87.381	32.82	24.955	17.63	0	0	32.717	2.373	43.986	17.459	162.82	13.367	16.071	1.66	27.242	21.647	15.834	12.896	22.6	38.094	8.329	447.037	32.765	5.621	15.642	28.065	21.355	3046.11	5680.83	34.159	23.007	19.9948	-0.272963
624	226854	83	1922.18	1948.54	2125.9	72.712	54.559	30.575	1.902	0	0	32.53	5.738	15.245	13.86	54.754	4.426	5.465	3.942	23.173	6.235	6.425	30.617	1.105	21.07	3.26	195.76	21.05	1.462	10.044	17.104	8.772	1036.96	1950.28	8.483	72.138	11.3301	12.9105
625	226858	33	1359.66	1528.46	1553.84	60.126	37.111	10.862	3.395	0.566	0	0	20.209	39.017	20.081	126.569	10.884	8.865	0	23.46	11.69	20.902	0.104	18.14	27.016	5.025	259.435	1.397	9.1	8.9	7.212	11.393	1425.97	2680.17	22.634	52.333	6.58637	7.79813
626	226992	36	1376.07	1480.11	1515.58	93.131	28.594	9.704	13.045	2.728	0	1.247	12.774	38.547	2.659	93.236	3.654	0.954	0	51.787	3.466	2.663	0	11.513	20.845	4.212	305.804	31.776	4.147	2.264	12.625	8.876	1782.8	3482.86	22.47	63.138	20.017	14.6211
627	227282	31	2514.1	2390.1	2641.75	81.848	25.005	9.295	0	0	0	22.254	1.006	10.006	1.116	5.186	1.218	0	2.123	6.481	0	0.93	0	2.397	2.515	0	6.786	0.893	0	0	0	0	754.886	1268.75	4.305	44.215	-15.0914	23.3708
628	228224	62	2836.81	2728.06	3164.02	152.566	29.397	16	3.355	0	0	49.672	0	2.259	3.162	11.84	3.709	0	7.292	1.995	0	2.154	9.282	2.247	19.988	0	79.97	0.326	0	0.693	4.772	8.283	890.653	1502.99	5.343	22.056	-9.6539	26.0022
629	228296	36	1958.73	1965.26	2067.74	135.45	68.727	20.833	28.566	0	0	25.321	9.663	13.103	11.191	126.858	19.002	28.724	0	71.022	33.256	5.42	0.168	43.075	80.138	21.136	973.964	61.025	7.915	5.021	125.472	125.835	4107.51	7307.1	13.202	34.507	27.9016	8.15149
630	228782	38	3902.17	3717.74	4265.83	183.148	48.522	23.591	1.211	0	0	34.869	1.134	0	18.782	5.313	0	0	1.622	8.718	0	0	23.18	0.424	3.301	0	59.679	8.671	2.029	2.217	3.545	41.72	1875.29	2953.77	8.499	33.174	-8.28098	29.159
631	229566	56	966.092	985.12	1250.57	68.891	51.863	16.231	15.574	0	0	30.503	12.816	29.705	33.538	126.805	24.671	4.075	1.524	32.773	20.133	10.75	6.806	15.071	54.316	0	401.474	26.539	13.561	14.301	3.524	91.108	2299.27	4055.84	68.928	67.132	19.8582	2.27863
632	229871	37	1001.58	972.398	1115.96	39.504	22.47	2.557	0	0	0	7.263	0	2.379	10.416	185.152	5.901	0	6.263	3.42	0.551	0.414	2.484	3.901	48.622	5.302	78.502	1.072	5.699	0	15.475	7.151	1195.74	2327.39	48.453	74.852	0.0162849	7.6479
633	229892	34	4111.13	4044.73	4236.97	191.894	33.65	13.226	0	7.071	0	18.215	4.585	4.784	2.218	607.496	8.995	0	0	12.126	1.149	21.457	0	0.675	0	0	162.403	0.858	0	0	0	1.298	1323.12	2276.3	11.314	46.029	-1.66486	3.09718
634	230248	50	1221.51	1189.34	1360.84	66.73	22.69	19.056	3.509	0	0.22	1.629	11.197	25.142	7.198	71.254	5.314	6.97	0	19.726	16.08	1.857	3.055	9.756	30.09	3.31	241.743	11.471	11.114	1.147	35.211	172.804	1724.55	2883.16	40.186	54.509	11.3526	17.2782
635	231128	42	1511.5	1534.07	1784.43	108.46	31.669	19.525	15.294	0	3.422	2.596	5.937	16.121	9.929	27.843	3.887	3.543	0	9.387	26.596	1.172	3.058	19.113	28.303	8.799	286.43	16.71	5.409	12.102	27.411	48.65	2746.13	4964.19	29.798	45.357	4.97033	20.343
636	232910	52	412.682	439.489	517.18	18.49	9.215	6.067	0.721	0.012	0	4.653	1.048	0.899	0	25.023	3.182	8.399	2.45	12.353	6.004	0	4.841	0	15.291	0	88.291	8.53	0	0	5.111	0	408.935	823.222	6.949	6.043	-1.5882	27.9965
637	233082	33	1877.41	1850.66	2064.69	83.763	36.622	15.75	8.105	1.829	1.832	0	8.789	38.261	11.966	34.31	9.263	4.926	0.908	11.027	8.665	93.245	0.532	2.155	28.591	4.204	261.47	13.974	5.564	0	10.362	44.053	1797.27	3137.8	25.753	40.811	5.06566	8.03388
638	233654	47	2947.34	3065.14	3414.24	129.758	59.941	24.322	35.729	0	0	0	13.89	21.145	15.463	58.056	9.574	5.125	0	63.529	17.808	119.35	6.362	24.199	68.311	5.469	647.001	61.043	0.415	0.09	71.049	95.239	3051.78	5504.52	35.454	41.525	19.144	-8.04179
639	233944	34	1325.66	1270.29	1401.77	72.056	35.385	8.235	7.793	0	0	0	11.433	10.997	9.543	40.006	3.564	7.518	0	6.417	19.476	0	0.659	5.455	11.728	5.574	156.221	5.875	1.919	2.351	21.725	5.229	1533.66	2791.62	31.156	57.587	-4.57472	17.9616
640	234038	40	1207.31	1321.29	1333.44	40.433	47.998	5.023	1.721	2.87	1.692	2.698	9.64	7.335	1.413	29.226	7.437	0.082	1.474	33.384	20.299	3.524	4.665	0.808	45.804	0	198.211	9.364	1.873	0	14.676	0	1416.79	2444.29	33.249	46.523	10.7068	14.5369
641	234043	26	438.001	427.483	537.155	14.424	6.032	0.99	3.041	0	0	0	0.434	0.422	0	12.075	14.325	0	0	3.708	0.676	0	0	0	0	0	38.837	6.731	3.816	0	1.062	14.198	497.484	677.496	23.24	13.121	-12.485	23.5335
642	234172	73	847.331	899.828	972.89	55.583	17.76	4.654	0	0	0	0	0	8.487	21.139	38.378	8.072	0	0	7.641	5.649	5.071	7.155	8.849	17.447	3.376	138.496	13.704	8.36	1.322	22.958	0.761	655.076	1178.45	18.116	36.46	1.05483	15.5994
643	234285	52	1782.68	1759.88	2083.27	125.329	32.788	31.763	2.696	0.283	0	5.519	11.422	19.424	8.905	53.002	10.394	11.349	6.294	32.073	18.107	9.849	2.02	12.406	54.522	3.025	298.932	15.292	3.805	6.514	44.294	11.95	2260.94	3950.03	68.563	88.802	13.8658	11.0219
644	234462	39	1428.46	1466.03	1483.91	83.728	23.644	13.693	14.147	4.492	0.102	0	10.072	14.626	18.429	40.454	1.76	10.34	0	43.483	12.243	0.316	0.163	3.729	31.02	5.815	239.838	6.992	14.058	0.825	7.943	1.914	1941.54	3416.81	8.023	36.463	9.60373	18.6554
645	234837	33	4588.89	5282.37	5781.05	205.409	102.155	26.246	0	0	0	6.798	7.318	576.31	1.778	13.939	0	4.098	0	9.739	5.751	7.546	3.398	5.075	9.548	0	99.62	3.058	5.234	1.973	2.942	46.501	2520.68	4512.76	15.426	34.403	-21.8742	12.2295
646	235045	67	2453.81	2469.48	2649.65	125.986	52.918	11.219	27.009	0	0	7.923	4.436	33.002	24.835	97.228	30.099	12.662	0	47.316	17.16	3.59	1.777	30.066	43.903	0.764	525.472	39.995	20.501	4.507	49.774	114.522	3383.55	5966.33	18.046	140.918	22.985	12.9879
647	235567	32	341.615	327.512	358.285	12.366	10.242	2.155	0	0	1.409	0	11.703	5.038	0	10.329	0.18	0	0	20.503	8.146	0	4.858	1.424	13.459	0	109.67	0	0	0	15.629	0	402.618	839.633	0	18.805	-7.05651	25.7569
648	235627	33	1183.62	1136.44	1435.88	36.985	41.065	11.871	5	3.667	0	8.358	2.043	10.639	0.974	12.898	1.909	0	4.397	11.741	10.489	0	2.806	0	23.377	0.653	132.753	16.116	7.63	0	0	0.866	1111.19	1907.17	16.675	60.728	-0.371252	17.5866
649	236855	52	1936.86	2092.09	2383.52	58.383	44.07	25.625	6.341	0	0	25.144	0	8.403	3.854	19.183	0	2.107	0	1.943	19.794	0	26.836	0	10.092	7.457	133.384	2.299	1.906	3.782	6.911	30.911	997.823	1800.04	3.727	41.562	-8.22174	17.8477
650	237164	47	1847.33	1794.96	2110.53	122.695	50.859	24.079	26.849	0	0	34.444	21.483	32.353	14.541	135.093	6.574	23.95	5.341	37.329	33.158	7.914	0.265	23.392	65.538	4.612	692.22	36.911	0.714	14.008	134.469	708.109	4898.04	8698.53	56.651	42.195	21.3407	3.35667
651	237998	25	1669.74	1427.9	1697.45	80.167	31.796	23.521	12.033	0	0	0	0	6.892	9.633	20.675	11.975	0.344	1.87	29.377	29.244	96.759	1.011	1.404	24.6	2.655	222.472	0	1.314	1.987	0.806	0	2075.4	3534.33	63.56	7.851	-5.48231	7.4493
652	239321	28	373.291	362.145	326.972	13.692	8.49	9.772	0	6.145	0	0	1.566	5.771	3.315	8.17	3.123	0.767	0	0	6.727	1.23	0	0	2.386	0	69.637	0.026	0	0	6.331	0.371	334.285	674.766	3.706	41.246	-11.8464	19.2214
653	239507	31	759.177	795.142	845.912	19.418	14.867	13.721	3.791	0	0	1.9	5.718	9.607	0.924	30.469	0	0	0	20.628	10.896	5.205	0.649	12.575	24.405	0	118.87	1.237	0	3.304	7.285	10.907	961.773	1548.97	1.736	13.737	-1.05336	14.3428
654	239744	34	928.861	943.966	1087.94	52.682	14.968	10.577	0.145	0.829	0	0.236	1.075	6.456	0.959	22.693	0.197	2.084	3.494	4.878	3.448	0	0.628	1.788	10.238	0	130.118	3.569	0	3.075	20.135	7.566	639.673	1104.62	37.005	52.507	-6.22377	18.9158
655	241193	45	812.821	918.821	1089.3	59.307	34.042	9.91	2.192	1.292	0	0	0	12.275	1.485	36.253	4.565	0	5.331	5.975	10.799	7.55	0.385	8.114	28.996	0	121.581	9.331	7.11	3.572	20.793	19.759	930.869	1487.9	34.13	26.819	-0.600039	13.0591
656	241232	56	1472.71	1584.55	1846.9	72.617	37.245	26.92	6.614	0	0	43.011	10.373	14.654	0.55	48.538	0	1.1	1.617	20.189	28.251	2.321	0	8.141	40.482	2.676	211.952	13.552	2.483	2.793	6.672	9.781	1576.32	2853.61	30.469	81.764	12.2958	16.068
657	241442	35	2746.49	2876.1	3078.33	127.703	18.869	9.326	0	0	0	28.237	0.271	682.344	3.663	11.401	2.892	3.114	0	3.203	5.942	15.546	0	1.542	5.984	0	72.49	9.437	0.889	0	1.032	14.696	1361.98	2230.96	5.102	18.995	-20.9494	9.9331
658	241675	25	2572.45	2444.13	2657.2	94.471	20.935	17.347	8.498	0	0	7.223	8.279	20.39	12.253	68.211	14.654	8.265	0.592	30.17	24.7	15.231	0	1.756	34.254	7.265	393.116	38.473	13.373	4.759	27.101	19.105	2727.14	4703.09	36.06	56.199	17.7116	4.21925
659	242204	32	2157.2	2195.59	2466.88	80.976	26.322	16.309	5.393	0	0	58.549	0	11.964	3.044	296.212	0	0	0	18.169	5.649	222.726	6.171	4.496	17.678	3.619	827.351	15.534	650.927	0	3.765	4.048	928.809	1582.66	27.283	28.024	0.145035	-15.6484
660	242738	36	2319.33	2588.48	2748.03	147.535	32.252	6.703	7.294	0	0	1.859	13.659	35.977	25.508	75.088	17.328	13.626	0	36.654	11.956	65.521	6.709	7.131	47.79	6.39	365.619	16.902	10.23	9.574	14.773	15.621	2799.28	4877.89	22.604	48.201	14.6956	-0.338711
661	243153	29	920.654	966.427	1169.84	31.427	13.955	14.521	3.114	0	0	1.829	0.878	15.317	9.709	46.457	0	0.396	7.365	18.536	16.849	3.795	0	0	29.278	0	187.043	12.041	3.046	1.898	13.867	19.455	1527.61	2891.45	12.048	13.194	11.2262	15.3692
662	243526	31	562.667	626.604	646.205	45.239	9.335	1.471	0.002	0	0	0	1.786	5.963	0	27.29	1.939	0	0	4.871	2.217	0	1.647	7.088	9.401	0	59.731	4.843	2.142	0	3.635	7.048	377.392	673.29	26.333	11.297	-8.41386	19.3696
663	243844	45	1463.46	1455.76	1509.59	70.218	28.375	14.715	23.149	0	0.358	8.028	8.078	27.927	16.378	121.485	37.243	18.664	3.378	24.648	21.545	0.824	3.619	6.707	15.228	9.48	222.735	7.473	6.76	15.122	21.287	182.248	1385.75	2448.53	5.387	75.837	10.9497	16.9706
664	244544	58	1752.64	1691.42	1961.97	92.703	33.105	19.984	12.899	0	0	0	20.067	38.268	62.906	146.937	17.492	5.711	0	24.788	19.423	7.887	10.411	23.14	24.374	2.63	337.148	28.54	54.794	26.116	36.445	47.148	2153.92	4133.58	16.385	59.554	15.5369	4.40379
665	244902	40	723.678	689.526	783.469	35.355	16.322	17.004	2.13	0	3.045	12.627	12.25	4.095	10.446	60.203	22.378	0	0	9.204	10.363	3.489	9.725	8.462	7.148	0	82.911	5.624	12.057	4.676	9.451	51.563	740.137	1268.45	16.481	36.349	-4.86894	21.1826
666	245071	45	1113.4	1009.87	1207.11	71.997	24.353	1.501	6.777	0	0	0	1.319	24.605	14.602	49.711	9.158	11.737	0	18.239	1.003	0.173	0	2.59	37.846	0	215.375	17.384	12.281	15.897	12.162	99.369	1274.3	2079.04	7.244	46.537	14.3526	17.9964
667	245294	45	1398.84	1340.54	1486.53	70.442	28.851	12.099	1.466	0	0	29.097	1.653	24.844	0	33.427	59.319	0.916	0	10.936	4.296	0	0	32.347	38.489	3.231	206.148	7.463	0.849	9.455	8.906	0	1262.94	2123.38	53.333	100.699	5.98987	18.9488
668	246000	33	3105.94	3279.62	3573.46	166.742	22.593	13.147	2.455	0	0	11.835	1.974	571.286	5.28	9.489	1.212	3.491	0	0	3.224	4.504	1.997	0	8.686	1.709	42.792	3.201	1.666	1.648	9.873	1.015	948.891	1792.46	9.94	7.754	-20.7936	15.2758
669	246484	42	4330.82	4585.36	4941.78	156.545	53.377	12.137	0	0	0	26.601	4.311	868.03	1.482	31.185	1.376	0.958	7.818	4.324	6.194	11.374	4.862	0.186	6.804	0.283	138.525	3.732	1.906	6.446	5.658	20.704	1358.77	2677.8	4.153	51.19	-23.2201	8.69606
670	247499	34	1155.85	1038.73	1193.56	74.114	19.883	12.664	1.77	0	0	40.274	8.971	0.63	2.622	354.77	2.723	1.601	0	0.521	3.07	0	0	0.567	9.657	0.214	226.953	11.541	0	0	0	1.517	1009.22	1822.39	58.964	42.218	1.23518	6.88872
671	247775	38	1858.95	1961.19	2066.59	79.439	38.144	16.959	3.641	1.256	0	0	14.779	39.319	9.01	78.328	6.858	7.2	2.557	54.546	23.506	1.187	0	5.61	63.145	1.978	317.353	56.267	16.384	0	24.428	16.342	2113.91	3811.37	14.277	51.223	25.218	15.0015
672	247854	73	2169.7	2157.23	2347.92	98.996	41.021	27.112	5.87	1.712	0	7.699	2.409	53.44	17.205	122.991	291.721	25.168	5.279	37.349	38.312	2.473	6.009	10.263	64.807	16.448	425.877	27.555	19.426	16.483	36.738	9.366	2693.51	4980.58	75.168	143.059	24.3031	13.4073
673	247993	52	1720.03	1587.85	2011.37	100.506	44.586	13.661	14.381	0	0	4.998	24.314	26.792	20.983	80.944	23.262	2.527	0	48.652	31.817	13.341	18.323	44.232	31.418	9.517	474.602	29.088	6.91	16.7	101.128	107.105	3040.75	5146.61	12.609	64.478	17.9085	4.45325
674	248921	27	246.93	233.911	308.956	17.2	9.954	4.959	1.893	0	0	8.258	4.869	10.887	1.615	12.221	10.892	0	0	18.532	10.701	0	0	10	1.249	0	86.572	11.307	5.374	0.067	9.567	6.148	584.465	1023.11	18.087	30.77	-3.91031	20.3749
675	249028	68	1926.74	2025.35	2175.12	145.779	40.943	26.373	14.155	0.74	0	0	17.809	11.521	5.41	64.869	4.816	3.075	1.211	30.043	26.501	0	6.466	29.137	28.079	0	550.505	34.584	0.708	2.951	67.506	20.91	3972.72	7206.65	15.483	66.654	19.4465	20.6503
676	249264	46	1950.83	1812.66	2224.55	110.945	58.681	17.508	14.738	0	0	2.241	9.475	22.381	8.162	113.506	5.568	0.144	2.62	55.02	18.311	10.441	6.223	19.321	97.51	7.65	458.963	21.33	11.125	3.401	62.644	154.351	3849.08	6561.82	58.167	59.77	21.1646	2.69239
677	249474	34	2547.74	2642.32	2920.36	101.458	42.499	11.082	14.535	1.833	1.194	0	10.208	30.492	13.434	88.999	14.733	14.534	0.874	78.376	30.647	15.349	15.4	81.494	69.294	6.3	573	34.381	9.482	14.878	247.89	209.083	4578.46	7990.9	19.317	37.449	22.1436	2.072
678	250140	34	1293.15	1280.75	1381.06	53.485	20.568	14.472	2.012	0	0	0	13.594	30.638	30.747	94.375	7.995	33.778	6.228	29.341	7.956	0	5.818	9.73	29.732	4.381	304.12	30.111	4.596	15.874	24.728	22.573	2069.54	3704.84	2.388	65.92	21.0558	15.3707
679	250286	33	1740.79	1740.22	2019.57	82.168	20.895	10.341	37.787	3.192	0.174	0	8.609	20.026	15.124	124.154	7.824	9.898	3.995	44.909	19.933	19.048	12.147	26.444	57.777	0.021	471.827	31.578	17.251	12.462	7.338	17.73	3655.6	6324.94	19.647	98.322	19.9195	2.4774
680	251049	42	894.358	1034.52	1014.05	48.915	5.174	4.514	0	0	0	0.212	8.562	23.838	21.692	58.71	8.764	10.096	1.621	0.941	10.007	12.138	0	17.487	18.986	0	126.731	8.853	30.466	8.523	28.013	10.062	784.432	1275.37	10.478	60.918	-1.87827	12.0441
681	251345	43	2011.71	1912.14	2151.54	120.694	42.343	28.265	13.427	0	3.365	0.348	5.616	26.448	46.893	140.2	36.862	21.412	0	28.083	18.315	0.908	4.957	17.3	59.216	8.514	498.065	45.242	22.349	8.572	56.19	100.937	3262.4	5450.7	20.487	71.73	25.5998	12.5553
682	251389	37	3409.88	3652.7	4185.32	185.277	30.167	17.072	0	0	0	13.295	5.147	28.393	0	29.863	0.471	16.061	0	30.777	9.698	6.218	3.925	6.737	60.507	5.644	412.541	12.19	0	0	17.161	4.71	2757.69	4642.05	46.472	68.022	14.3892	11.3832
683	251467	39	1088.32	1150.79	1308.57	72.488	15.817	5.999	2.957	0	0	10.866	0.228	5.257	5.177	7.895	1.46	4.153	0	0.521	18.915	0	0	0	32.703	4.547	137.44	9.169	4.718	0	30.956	0	518.813	1237.9	1.664	4.132	-3.31034	24.27
684	251634	33	1277.31	1077.58	1403.99	31.775	14.138	11.287	2.335	2.014	0	7.8	4.527	22.124	7.619	54.304	11.903	3.412	0	40.215	7.946	7.585	1.44	7.427	40.201	11.602	198.961	26.762	0	0.516	20.65	8.333	1792.03	3316.62	62.718	49.865	18.1908	9.72351
685	253663	33	456.114	478.578	545.859	54.517	18.712	2.08	3.143	0	0	14.249	5.44	5.146	1.484	37.679	3.353	1.461	0	10.626	23.871	2.561	0	3.349	25.737	3.076	135.576	7.412	2.682	7.02	3.061	32.02	1087.05	1951.17	17.066	28.42	0.415493	24.569
686	254013	34	1091.58	1061.71	1239.19	36.925	34.448	23.251	10.266	0	1.322	0	2.58	2.851	3.224	11.153	0	0	2.082	2.596	4.869	0	2.85	10.709	17.753	0	167.337	10.231	3.73	1.898	3.125	2.395	1160.33	1840.17	13.596	53.758	-4.36203	26.0172
687	254948	65	2974.82	3104.22	3225.34	121.826	67.506	35.211	26.268	0	0	0	20.51	9.175	13.7	102.214	19.666	16.115	0	66.28	36.6	8.83	2.823	46.655	52.894	3.487	753.977	61.705	13.199	12.95	85.827	63.719	4769.03	8389.53	20.578	78.779	23.388	4.06727
688	255121	59	1341.49	1374.75	1543.75	63.555	31.381	20.874	12.421	0	0	6.239	21.419	17.651	4.833	49.541	24.323	2.506	0	34.303	11.139	0	0	0.889	35.343	2.792	223.916	15.218	0.944	9.885	18.258	10.728	1885.55	3215.08	18.856	66.053	13.9675	19.4939
689	255566	27	1048.68	992.946	1104.41	47.182	24.311	10.037	8.595	0	0	11.598	19.165	21.261	5.313	89.973	7.883	7.667	0	25.656	11.774	1.747	7.573	5.258	6.267	0	219.423	25.995	9.053	0	18.896	19.374	1619.81	2834.01	9.658	54.415	9.90799	16.1958
690	256506	33	2010.46	1987.38	2245.44	126.269	54.642	20.374	80.886	0	0	24.069	33.576	177.752	95.146	613.304	74.07	22.372	1.082	77.783	60.83	12.884	22.9	56.95	85.793	6.917	1183.17	68.039	27.71	28.069	190.691	1614.3	4906.43	9005.42	5.633	27.819	25.8381	-7.51544
691	256759	33	3524.5	3497.36	3850.35	176.914	37.122	17.051	36.221	0.342	1.962	18.042	9.736	38.211	14.017	217.72	10.209	11.716	1.917	105.038	30.727	13.993	7.947	10.771	141.188	0.327	1007.25	109.971	7.138	12.94	187.541	98.12	5110.54	10542.9	14.188	36.861	29.4781	-4.12972
692	256844	36	2709.24	2741.39	3353.6	101.144	41.941	19.636	4.518	0	0	26.119	0	11.562	2.659	545.676	0	0	0	9.29	2.573	55.213	8.305	0	18.714	0	412.997	8.128	0.472	4.111	0.325	22.864	968.349	1975.92	9.87	64.138	-3.86749	-1.62514
693	258296	67	3249.02	3182.84	3596.89	152.847	47.758	32.155	4.124	0	0	18.989	15.344	92.169	42.761	278.981	21.896	12.96	0	39.048	21.353	84.081	17.916	28.833	79.632	6.958	731.681	78.917	20.148	11.465	25.204	41.138	3925.07	6391.09	30.941	125.731	22.9322	-8.39179
694	258534	31	1277.4	1216.29	1427.68	43.58	24.064	9.702	10.05	0	0	0	22.696	32.809	3.243	122.72	11.376	5.349	3.234	45.738	20.969	0	9.171	12.983	32.138	4.861	549.907	27.248	14.501	16.874	63.92	171.994	3434.79	6387.29	14.637	30.27	23.0233	14.6554
695	258704	62	1178.14	1322.57	1458.86	88.278	13.225	21.538	17.826	0	0	0.069	9.182	14.205	11.125	74.872	39.619	1.978	1.082	30.519	12.895	0	2.389	22.356	34.396	0.761	360.624	47.456	0	0	43.867	58.682	2450.86	4744.16	29.82	41.306	19.1913	20.3159
696	258830	70	1213.37	1255.79	1333.6	62.59	24.157	17.216	9.993	0	0	21.893	11.665	15.761	27.354	39.255	7.236	5.916	3.215	27.081	10.784	0	0.993	12.674	63.616	5.131	268.868	20.1	0.755	0	9.504	15.242	1907.28	3460.8	20.265	119.821	14.6876	21.9503
697	259353	28	1997.8	2167.43	2472.94	93.171	26.232	18.908	5.275	0	0	24.117	3.779	15.758	0	55.187	3.765	13.982	0.548	30.842	10.391	1.597	1.864	7.812	30.26	11.079	487.022	24.472	11.427	11.193	15.522	30.392	4196.52	7259.14	15.236	43.203	17.0747	19.4683
698	259421	63	440.607	507.786	530.546	17.034	30.331	1.76	0.233	0	0	0	11.641	24.28	19.923	20.856	4.618	0	0	0	10.724	4.348	0	20.18	0.938	2.415	50.886	0.894	4.999	4.647	4.008	0	452.989	893.204	10.649	49.44	-12.0673	17.6615
699	260086	35	1635.53	1422.32	1728.63	78.572	46.789	6.448	11.886	0	0	0	9.316	49.886	23.16	110.604	29.86	3.648	2.921	19.71	12.475	10.613	17.677	8.587	33.064	7.399	239.034	15.83	8.941	25.317	60.302	48.571	2194.54	3885.37	16.245	19.741	15.0131	8.89548
700	260380	64	2495.16	2503.63	2853.21	171.729	42.071	21.898	9.054	0	0	1.889	6.69	16.015	8.549	67	16.215	16.583	0	26.482	35.245	10.407	3.357	7.631	67.742	2.567	449.929	14.496	1.9	1.958	35.511	88.209	3192.17	5769.76	22.101	100.81	16.4036	6.77026
701	260477	31	772.029	681.232	896.353	51.902	29.861	28.076	47.363	0	2.809	4.004	6.487	34.695	18.68	76.764	13.01	6.077	0	45.432	11.789	2.206	0.485	22.241	63.428	0	500.311	49.534	0.277	1.634	133.704	147.39	3675.9	6415.2	20.191	41.307	23.6586	12.2174
702	261731	41	2129.64	2209.94	2394.8	80.517	48.359	23.717	8.387	0	0	14.08	4.332	20.698	11.85	44.492	8.358	7.935	4.189	20.943	6.585	6.686	3.725	3.299	31.657	5.725	411.591	29.766	2.391	1.978	31.14	23.033	2328.84	4075.71	72.93	82.915	14.9917	13.78
703	261803	69	752.512	709.503	802.636	29.295	10.307	7.841	2.873	0	0.299	9.593	2.863	6.144	5.251	12.203	4.165	5.883	0.641	6.259	4.299	3.521	1.47	0	46.509	0	193.827	0.676	0	12.015	9.776	9.357	866.664	1621.04	29.322	31.476	-2.21472	22.6471
704	262360	42	1557.62	1689.16	1725.03	77.831	28.819	19.68	12.705	0	0	0	11.357	20.641	18.413	42.356	3.251	6.157	2.201	67.875	28.807	3.655	3.765	17.495	70.442	11.862	339.68	64.276	20.363	8.993	11.964	11.758	1763.54	3005.29	11.941	55.128	22.0244	11.0145
705	262442	26	776.633	787.418	988.309	33.216	12.535	1.903	6.638	0	0	13.196	13.05	6.768	3.647	66.549	5.016	2.137	0	22.5	0.328	11.573	2.398	9.307	3.8	2.225	159.82	8.278	4.042	7.157	7.603	10.584	1455.26	2737.86	12.422	29.334	3.32161	5.0017
706	263554	46	1092.77	1079.39	1281.66	73.445	22.663	9.02	5.561	4.933	0.187	0	5.385	24.378	0	28.699	1.923	0	0	15.664	6.029	5.404	0	12.949	12.972	0	141.936	4.58	0	0	38.714	1.653	946.652	1599.71	30.378	50.366	-6.42875	13.4142
707	263869	26	626.891	567.987	734.248	37.386	20.405	6.977	0	0	0	3.723	1.051	7.244	0.762	6.222	0	5.201	0	7.719	11.607	0	0.192	1.282	11.784	0	104.726	7.772	1.356	0	8.406	1.882	596.544	981.911	0.279	11.179	-7.05137	18.2031
708	264173	24	667.651	556.043	661.068	27.373	11.122	0.458	0.936	1.734	0	4.013	10.001	5.591	3.266	7.911	0	0	0	4.172	0	5.591	0	0	9.493	2.421	60.524	18.452	0	0	10.147	0	548.769	1039.24	3.776	44.652	-4.89618	23.7077
709	264605	43	2362.69	2223.37	2395.44	109.982	24.796	31.871	5.825	2.248	0	0	10.76	22.384	6.72	24.469	6.894	31.017	0.507	33.559	13.548	2.75	0.876	0	23.714	1.916	283.249	7.565	1.941	2.199	20.663	11.502	1859.53	3373.9	30.623	69.824	9.19052	18.5776
710	264951	26	770.914	707.714	820.648	43.965	11.568	13.637	1.874	0	0	9.802	18.66	33.563	20.039	115.561	41.778	2.03	0	18.61	7.371	11.143	14.082	4.507	33.667	4.041	121.186	12.523	13.246	23.449	9.393	6.428	713.078	1445.3	0	68.802	7.62197	9.52486
711	266419	33	2535.93	2682.87	3197.8	121.301	30.386	13.677	9.104	0	0	6.217	3.703	12.697	13.359	58.773	12.166	22.439	0.558	38.397	36.984	27.257	1.315	29.695	43.936	0	527.638	19.052	16.115	1.527	38.032	69.178	4108.71	7547.4	41.513	33.883	15.1036	2.20824
712	266947	30	1335.27	1463.82	1564.36	46.981	12.853	6.847	3.456	0	0	0	10.131	7.238	5.766	59.098	9.745	4.004	0	5.639	15.064	35.926	0.713	14.437	13.967	0	137	10.924	13.5	12.46	28.132	20.651	2205.74	3873.19	35.042	45.461	-3.6859	7.48863
713	267078	30	1157.13	1296.31	1457.98	49.064	17.672	8.646	0	0	0	60.368	2.464	8.643	7.172	18.103	4.667	0.686	0	2.373	11.982	1.548	0	0	2.427	0	72.861	0	0	0	0.693	2.058	1724.66	3129.13	14.072	74.944	-11.0927	18.5065
714	267379	68	1533.65	1501.53	1776.58	95.606	45.521	5.205	15.832	0	0	1.293	8.922	14.57	15.682	64.473	9.619	10.29	0	46.291	21.149	5.802	9.16	6.528	51.213	0	557.977	8.639	6.129	8.702	2.944	9.966	1613.04	3078.81	38.813	126.79	16.9632	6.92296
715	267397	38	873.212	993.067	1107.73	53.324	12.785	10.622	0.759	0	0	0	0.491	1.045	13.986	14.725	2.73	0	0	16.936	0.767	0	0	0	10.732	0.867	63.502	5.89	1.407	1.334	0	0.557	751.226	1409.85	1.812	52.032	-6.41617	28.4044
716	267745	46	1607.04	1641.65	1835.6	86.425	22.273	8.741	0	0	0.109	3.315	11.118	29.374	11.485	26.393	3.625	1.024	0	26.786	16.832	0	0	2.672	48.443	0	193.716	15.527	0	1.149	22.16	5.582	941.29	1693	25.143	30.796	11.0479	19.624
717	268909	29	1427.56	1334.38	1611.53	87.52	20.312	13.698	2.189	0	0	15.307	6.73	20.314	6.204	91.442	2.32	0.551	0.813	27.41	6.519	9.398	1.453	0	59.538	0.67	400.49	30.669	2.228	1.274	33.911	68.023	2860.85	4944.42	11.959	34.735	18.7436	4.88558
718	269325	73	1637.34	1643.71	1786.82	71.168	28.662	31.068	4.847	0	1.958	0.992	9.541	15.108	17.86	47.178	7.454	0	0	45.931	15.938	0	9.424	27.816	29.26	2.199	229.989	13.556	3.161	0.653	35.383	10.209	2803.93	4962.06	28.723	55.942	13.5458	19.589
719	269612	28	2370.43	2489.24	2841.32	75.041	36.627	11.892	6.212	0	0	9.707	3.716	12.959	3.162	22.235	2.678	3.085	0	10.714	8.873	2.184	0.061	0.247	10.625	1.821	209.505	6.896	0.676	5.454	17.786	6.573	1597.26	2930.98	35.037	42.181	-4.26157	16.3662
720	269700	33	2660.77	2702.61	3084.17	90.52	33.296	11.888	0.906	0	0	26.426	7.488	4.895	3.051	590.951	3.787	1.169	0	26.58	0.618	2.255	0.157	4.689	33.561	7.076	888.831	5.058	1.653	1.316	2.923	2.473	1380.88	2225.9	69.222	64.092	13.2942	-4.0057
721	270024	70	1247.12	1162.69	1400.22	83.937	42.77	14.512	0.49	0	0	0	7.715	22.978	9.728	37.099	7.033	7.838	0	13.39	18.74	1.245	7.407	11.064	37.006	8.402	220.115	36.618	6.824	3.56	3.361	12.775	1694.02	2617.68	31.972	71.559	15.7663	18.2072
722	270043	37	1496.74	1551.15	1726.96	72.335	30.181	16.412	17.357	0	0	0	3.896	22.798	15.263	125.79	14.439	12.777	0	6.308	11.163	17.606	6.505	8.157	18.394	0	259.409	21.766	8.785	0	29.215	83.585	2655.11	4493.27	30.243	30.792	10.5022	5.55952
723	270778	45	3457.87	3374.84	3933.69	211.748	55.945	34.353	1.231	0	0	21.704	1.414	2.618	0.527	201.35	1.659	2.987	1.273	4.203	4.543	14.238	0.9	0	11.775	0.77	148.255	2.019	1.656	2.637	4.495	8.904	1460.45	2586.53	8.448	43.634	-0.526592	3.11551
724	271414	37	1501.55	1372.77	1640.69	72.834	21.34	9.436	12.001	0	1.93	0	1.655	35.727	12.468	66.711	4.871	1.309	7.828	11.901	19.137	4.242	6.138	5.296	35.699	0	306.851	16.906	1.008	9.419	21.15	182.346	1936.29	3425.96	6.171	48.82	15.5254	13.1646
725	271815	29	527.261	590.106	583.263	25.745	10.886	4.306	0	0	0	6.681	0	11.909	7.822	24.146	3.924	6.562	0.211	5.293	9.414	7.162	0	8.272	17.033	0	55.62	10.415	0	0.424	7.4	13.345	479.376	776.31	22.569	19.276	-3.25532	13.0067
726	272852	30	1195.14	1079.45	1364.42	59.949	12.851	13.355	4.564	0	0	15.738	0	8.577	12.206	55.975	7.729	5.819	1.652	31.375	11.077	2.18	3.408	7.074	28.57	2.167	198.519	17.94	10.257	7.63	18.18	12.317	1429.38	2938.75	7.007	54.172	12.5501	24.0167
727	273427	24	512.006	412.136	554.959	4.965	6.625	6.05	0	0	0	10.244	2.283	1.338	1.84	20.43	0	2.762	0	5.875	1.278	0	0.386	0	5.094	1.231	61.797	0	0	0	11.52	7.047	481.239	773.28	2.586	41.641	-11.2201	22.6981
728	274066	34	732.605	607.616	677.053	44.87	21.061	13.295	10.607	0	0	0	3.946	10.015	4.137	42.005	0.642	1.274	5.005	18.969	3.031	0	0	1.082	12.193	15.188	155.65	3.72	0.473	0	3.404	1.876	773.595	1473.83	3.129	43.233	-2.11272	15.7228
729	276126	54	805.951	791.669	964.482	44.357	24.483	7.757	1.262	0	0	0	11.238	2.698	0	18.35	10.234	0	4.288	14.131	8.459	4.493	0.939	8.918	26.599	0	202.611	21.999	5.326	0	26.782	4.746	784.818	1448.22	0.257	35.199	1.007	28.3306
730	276959	59	1375.39	1401.82	1467.07	93.079	34.161	15.652	14.214	0	2.395	0	0.35	6.139	2.971	42.49	17.679	18.518	0.953	12.263	5.36	2.41	0.704	7.443	44.898	0	326.14	10.541	5.705	10.247	46.412	20.349	1968.99	3529.1	12.555	76.629	5.94995	24.291
731	277010	48	2900.91	3120.92	3171.4	98.951	41.456	25.377	12.764	0	0	14.122	39.759	104.4	23.117	401.548	48.4	52.42	0	96.375	27.716	22.738	11.762	36.925	77.608	12.618	711.26	73.626	13.641	29.365	134.491	337.638	4982.89	8643.68	22.022	123.599	25.7492	-7.28245
732	277016	29	1246.56	1082.22	1182.6	77.918	11.193	4.184	3.307	0	0	9.722	7.67	14.018	19.285	59.044	19.631	14.143	0.215	11.595	14.996	8.577	3.059	16.745	25.788	0	179.265	8.972	9.025	24.738	31.563	169.261	1580.53	3073.14	13.177	14.756	5.70998	12.8842
733	277056	41	2261.5	2087.9	2276.84	127.483	44.731	29.357	4.227	0	0	1.411	13.383	23.187	19.633	23.139	8.911	10.921	0	25.508	22.975	16.329	0	11.026	89.268	3.049	371.491	25.307	1.867	0.754	39.772	19.75	2583.27	4250.31	33.649	27.07	12.1875	8.4209
734	277937	31	751.612	724.853	924.999	42.105	8.204	3.254	17.157	0	0	3.089	7.799	36.769	12.717	68.525	20.821	3.022	7.201	5.098	6.588	10.658	0	7.825	22.629	0	150.032	16.911	4.503	6.642	23.975	5.909	769.983	1479.99	13.387	49.625	7.04728	13.2095
735	278552	45	1859.8	1959.27	2015.4	80.129	28.973	10.749	5.417	0	0	0	7.088	54.456	4.711	36.383	2.945	1.792	0.016	18.906	71.77	2.59	0.894	9.51	37.115	8.429	307.756	17.288	0.038	5.237	12.319	11.078	1489.45	2888.36	48.236	45.994	15.6303	13.4786
736	279526	35	1009.44	1003.62	1044.3	42.013	27.573	4.354	3.464	0	0	2.542	3.833	26.506	0	18.103	0	0	0	26.704	5.689	14.56	0	1.259	32.333	0.125	136.073	26.49	0.511	0.556	8.499	0	824.332	1216.44	31.624	18.906	8.95743	9.52994
737	280032	33	1036.12	1155.35	1193.31	52.904	23.529	1.978	10.777	0	0	4.636	1.549	38.274	8.743	57.45	28.974	4.043	0	45.167	10.36	6.593	2.111	12.078	17.753	4.909	185.105	16.362	3.075	9.318	7.606	47.239	1200.62	2143.18	15.241	41.055	14.5525	10.7165
738	280606	32	864.778	805.898	842.432	39.566	8.683	19.681	3.428	3.201	0	7.92	8.741	7.583	0.813	35.475	12.617	3.865	0	3.28	4.688	1.954	2.99	3.485	0	0	151.663	13.329	5.855	2.589	12.196	11.473	1031.15	1889.64	7.5	45.048	-9.58956	19.8543
739	281191	50	6502.23	6539.56	7663.08	292.969	72.566	29.559	4.361	0	1.827	6.877	0.815	938.066	9.902	33.804	0.891	1.163	0	19.309	7.204	11.107	5.094	8.191	16.295	2.541	147.725	7.817	0	4.384	13.189	7.765	3466.44	6116.49	17.182	29.52	-14.5543	8.65902
740	281480	37	1479.46	1504.74	1630.1	65.062	22.307	20.683	24.75	0.071	0	14.5	22.574	52.326	56.324	398.573	51.337	14.212	11.58	60.748	10.428	33.731	6.295	19.419	26.434	19.548	454.742	13.408	12.41	21.638	26.713	98.116	2939.15	4835.84	9.999	65.651	18.2181	-3.98043
741	281941	38	1954.94	2153.95	2207.04	101.559	48.31	32.688	56.392	0	0	0	16.557	36.587	28.798	197.865	30.445	13.081	5.091	39.303	45.209	17.753	8.127	63.572	112.488	22.048	870.412	43.7	12.537	0	108.266	155.826	4322.11	8315.76	17.049	67.642	22.8783	-0.794755
742	282034	37	1390.1	1519.91	1688.49	97.531	38.181	19.452	2.541	0	0	0	3.011	26.951	4.837	37.095	4.452	3.68	0	27.535	22.196	5.773	0	0	21.678	3.037	144.82	17.949	5.784	0	26.388	32.911	988.012	2093.11	14.399	15.17	7.53608	15.4015
743	282603	35	971.354	923.984	1147.53	77.206	22.736	3.533	4.696	0	0	0	2.437	8.552	9.583	38.015	0	1.655	0	11.97	1.894	0.648	0	21.736	22.871	0	133.412	12.872	0	0	12.1	0	1219.76	1978.35	11.125	38.9	5.70838	22.3953
744	282835	39	1112.01	988.252	1260.88	67.852	21.878	12.047	10.328	4.818	0	1.584	13.99	41.813	18.781	84.969	9.566	0	0	11.321	4.689	1.796	0	8.593	17.165	0	114.964	15.063	0	4.354	8.543	2.824	841.809	1618.26	24.117	12.175	6.75602	15.3019
745	283186	65	1886.27	2011.37	2235.99	131.884	32.736	23.004	8.351	10.753	0	6.636	9.963	34.625	19.145	92.568	30.804	9.99	0	39.756	22.473	123.653	5.942	15.78	45.07	0	381.724	53.051	2.181	7.33	18.628	28.51	2321.76	4205.11	46.674	110.489	19.1393	-7.806
746	284810	29	662.819	664.083	806.368	29.299	3.7	11.29	0	0	0	0	4.494	43.616	31.939	136.071	16.872	5.899	0.269	19.305	3.009	19.553	6.195	9.5	27.932	1.612	163.544	3.552	17.054	2.187	14.933	17.111	657.666	1310.67	3.912	55.589	6.60172	7.92495
747	285675	32	3012.85	2941.2	3395.91	136.69	24.526	27.826	0	0	0	29.831	0	12.212	0	511.819	0	0	0	27.396	0	0	0	0	11.585	0.39	1322.05	14.922	0	0.12	1.575	0	1368.26	2754.14	5.566	22.002	14.7024	-4.51302
748	285722	62	2589.33	2412.31	2622.32	131.088	28.186	27.088	5.613	0	0	6.659	4.728	34.565	3.433	71.184	6.933	9.246	0.725	24.735	18.828	3.797	6.686	17.829	60.291	14.067	345.397	26.382	0	0	35.541	20.013	2491.53	4420.04	35.166	53.631	19.2792	14.0827
749	287188	49	3345.5	3283.27	3756.62	176.875	45.072	19.113	7.559	0.878	0	19.229	3.824	250.787	11.396	23.597	5.187	0	0	49.409	12.209	122.616	1.658	17.746	44.809	0	182.701	18.803	5.169	3.142	14.432	0.866	1561.14	3032.96	15.396	71.506	-11.4255	6.1809
750	288176	40	2032.39	2082.32	2291.12	84.621	37.452	19.392	13.909	1.739	0	15.75	16.78	28.615	23.456	163.062	25.292	12.171	0	37.004	26.253	2.707	0.676	8.113	36.368	0	446.835	46.086	8.717	8.835	66.278	20.757	3225.72	6264.58	19.791	96.179	23.9521	12.8182
751	288592	40	2603.7	2593.98	2734.89	121.87	28.028	19.055	7.546	0	0	13.263	3.415	21.595	3.415	17.396	1.924	14.078	5.244	8.02	5.544	6.027	2.769	1.601	22.786	0	206.591	8.346	2.131	0	30.331	6.819	1412.25	2581.48	63.682	113.494	4.88863	14.7789
752	289496	74	1858.54	1880.56	2145.52	165.215	37.683	30.669	38.776	0	0	31.968	36.418	64.206	27.056	242.575	22.901	36.557	2.732	110.558	48.185	11.962	8.372	139.93	86.405	6.214	871.263	80.171	9.817	27.484	315.198	463.025	4605.04	8552.82	25.708	128.709	27.6913	-3.93833
753	289511	34	1057.81	1032.63	1149.79	54.971	17.058	11.152	11.013	0	0	4.553	1.543	9.533	1.922	21.792	6.201	2.481	0	14.366	7.432	1.699	4.616	1.034	26.122	11.598	112.08	13.732	19.442	2.468	30.397	3.491	749.334	1446.16	21.454	37.566	3.55916	16.8338
754	289603	35	2594.85	2629.98	3122.01	132.2	50.742	11.747	6.712	0	0	0	4.908	37.049	20.983	46.055	11.329	5.079	0.434	46.553	29.944	11.06	0	6.305	57.377	1.609	524.316	38.077	2.53	5.431	29.073	22.357	3167.07	5677.83	38.585	56.586	20.5167	9.14952
755	290058	57	1292.83	1333.21	1559.25	40.882	36.96	18.357	0	0	0	11.628	2.405	0.405	2.431	29.515	7.969	0	0	10.46	0.125	2.407	0	2.617	23.699	4.777	142.675	4.371	0	1.989	10.664	12.411	765.844	1633.58	19.062	77.18	-1.21237	25.1846
756	290175	44	3244.39	3274.79	3639.92	185.137	50.057	34.071	15.964	3.532	0	18.641	29.184	114.574	35.385	483.789	47.532	32.363	6.854	116.366	47.476	17.94	18.575	35.681	102.375	8.272	985.782	51.536	22.596	27.932	93.597	163.827	6616	12599.7	26.867	129.988	25.8578	-7.40903
757	290288	31	1090.44	1075.81	1268.2	45.23	28.637	8.634	3.374	0	0.538	1.773	3.161	12.157	0.844	27.463	0.416	12.417	2.343	19.272	5.418	10.051	0	1.836	36.67	2.108	226.667	20.281	2.079	4.19	17.906	2.509	1458.58	2456.47	26.551	39.993	10.2384	13.2486
758	290667	57	998.724	1071.38	1259.31	61.519	24.765	15.832	8.036	0	0	0.031	8.999	30.823	9.474	67.249	14.071	11.047	4.092	30.578	8.182	1.476	4.264	3.967	88.656	0	217.287	24.038	5.793	3.627	5.835	4.971	1307.01	2245.51	19.05	46.634	19.9438	16.5218
759	291296	40	588.385	590.504	643.494	30.086	15.527	2.315	0	0	0	134.556	6.073	0	3.27	16.881	5.945	5.666	0	1.725	0.274	0	1.022	0	18.28	0	59.746	8.555	0	0	34.242	11.341	964.917	1598.81	46.568	108.099	-5.81233	27.0547
760	292457	32	1221.9	1239.34	1419.67	65.477	28.596	3.539	2.372	0	0	0	8.255	26.308	4.222	72.165	16.399	0	0	12.947	15.453	6.987	0	0	25.621	0	120.689	16.463	3.338	4.464	14.252	6.673	1311.28	2428.75	20.103	35.727	7.39467	14.384
761	292583	33	960.3	931.783	1138.79	64.278	22.498	5.81	6.474	0	0	4.837	1.323	5.125	18.723	39.117	3.769	8.28	0	21.666	7.981	4.35	11.871	4.877	23.139	1.376	132.915	8.048	9.264	0	8.45	5.66	1375.91	2496.94	17.463	52.31	5.4033	24.5033
762	292716	74	2868.57	2770.7	2991.97	169.69	54.227	25.544	0.419	0	0	22.881	13.798	31.157	2.356	57.742	7.1	18.204	0.526	37.785	13.767	0	0	6.154	51.43	4.909	313.408	31.278	4.484	4.474	37.067	7.39	3121.41	5667.54	52.588	112.325	20.9331	17.2446
763	292850	28	2070.59	2349.06	2552.77	83.413	36.392	18.246	18.01	0	0.617	7.802	6.563	8.454	4.425	80.62	5.445	6.555	0.476	12.516	8.653	10.257	6.724	42.849	44.385	15.425	460.985	17.62	1.12	4.505	94.559	76.75	2682.94	4642.21	14.976	38.359	11.0544	10.2595
764	292901	28	1333.41	1334.98	1411.95	47.837	21.57	4.974	4.56	0	0	0.179	0	10.885	11.98	4.77	0	6.009	1.332	13.138	10.456	22.025	4.296	5.064	20.088	0.202	221.249	8.578	0.472	0	11.054	13.48	954.218	1886.22	36.978	27.729	1.086	13.7107
765	293210	31	2756.34	2529.18	3089.4	109.726	27.528	12.761	8.444	0	0	16.907	13.124	21.19	14.802	124.884	9.814	3.174	0.798	26.326	18.398	2.422	6.116	3.277	33.101	0	521.087	28.487	3.443	0	44.394	66.12	2856.59	5320.44	5.015	41.547	19.4988	5.15965
766	293830	47	2013.66	2047.68	2296.9	90.234	49.617	16.217	10.974	0	0.266	24.358	3.068	28.637	3.484	50.345	0.927	3.726	2.369	22.945	23.469	1.84	14.874	17.247	46.324	0.734	329.837	26.025	9.064	15.686	43.269	75.904	2351.19	4124.75	53.737	56.489	16.9993	16.2741
767	294070	60	2894.85	2985.16	3348.58	129.462	45.166	14.529	3.04	0	0	2.053	13.224	46.166	23.519	174.527	17.523	11.658	6.858	83.761	25.658	16.209	4.384	25.781	75.591	11.533	397.416	39.181	2.818	10.259	40.636	20.142	3088.23	5105.25	20.756	65.631	24.6246	-1.61165
768	294092	46	781.991	682.443	774.336	38.503	17.86	16.036	2.477	0	2.794	0	5.233	7.902	8.479	28.984	0	11.32	0	17.032	13.599	15.871	0	48.536	34.884	1.504	164.709	7.789	14.305	3.806	76.281	66.534	1286.18	2324.98	11.826	40.191	3.20382	11.7145
769	294136	66	1307.83	1267.64	1580.02	75.762	41.036	3.174	5.421	2.444	0.79	0	7.083	19.04	10.208	39.818	6.34	9.071	4.045	10.895	12.123	8.884	0	2.076	11.248	2.787	168.444	11.804	6.861	0	7.122	33.921	1766.16	3254.68	30.26	62.171	5.52223	12.2486
770	294513	57	841.416	939.34	942.647	45.901	11.508	2.019	0.501	0	0	17.768	0.367	2.842	1.873	23.883	3.399	0	1.127	3.237	10.652	0	0	0	14.889	2.544	119.949	16.794	6.239	0	2.995	0.857	789.336	1639.52	14.408	103.729	-3.19272	25.8009
771	295036	48	1547.52	1540.92	1642.58	69.841	43.941	8.896	0	0	0	9.637	2.079	32.35	10.163	37.068	5.957	0	3.358	24.101	18.15	0.404	10.46	0	48.175	0	182.487	22.623	5.951	1.416	6.119	23.755	1531.26	2681.56	26.638	44.62	14.6418	20.0676
772	295618	28	1729.89	1796.44	1900.25	109.305	36.104	4.153	11.191	0	0	7.513	25.231	22.258	4.886	62.979	5.854	11.812	0	38.294	9.222	13.369	4.05	2.348	67.223	3.153	341.649	23.826	11.066	8.285	30.887	13.184	4222.51	8071.22	19.244	39.733	16.9244	8.19421
773	295686	35	617.507	641.012	647.756	27.563	4.236	10.341	0	0	0	2.596	4.736	8.108	9.364	47.325	5.538	0	0	2.806	1.891	0	0	0	22.508	0	128.216	2.976	1.713	0	8.806	16.95	832.747	1282.48	0.13	18.905	-0.242299	20.9044
774	295957	28	832.419	768.408	958.165	46.997	4.304	17.634	0	0	0	0.625	0.486	15.101	0	34.961	3.899	2.06	0	20.771	29.117	0	1.583	4.087	17.955	0	159.718	9.347	2.103	0	27.787	1.953	1120.88	2005.82	27.033	18.783	7.69649	20.2661
775	296319	29	2089.84	2031.71	2375.88	94.68	18.467	21.908	0.334	0	0	9.842	1.364	14.675	0.261	45.136	1.237	6.178	0.124	17.274	4.992	6.369	0	3.663	37.753	0	226.451	17.638	0	0	10.569	4.052	1901.33	3279.51	10.539	35.872	11.0763	13.4235
776	296421	41	2283.75	2165.53	2377.43	86.118	50.423	8.191	5.807	3.457	0	0	1.175	26.36	3.62	67.344	4.124	0	0	16.312	3.02	0	0.239	5.587	44.233	9.988	285.664	15.956	5.875	5.816	24.262	3.916	1381.04	2460.57	13.809	61.791	16.3549	17.281
777	297460	45	4241.4	4529.81	4842.06	134.201	37.778	31.59	3.138	0.318	0	0.853	4.154	49.226	7.042	34.435	9.401	8.467	0.277	27.663	19.518	7.215	1.384	6.555	64.698	1.864	379.942	45.852	0	15.133	32.963	45.902	2916.43	5195.42	42.139	90.75	19.7209	11.5979
778	298457	47	2334.96	2405.1	2607.7	137.276	36.325	31.775	6.343	0	0	0	14.188	32.395	9.397	44.801	5.01	1.204	0	52.725	10.954	0	2.827	3.611	76.87	4.462	500.439	22.475	0	0	14.671	34.124	3274.04	5928.77	32.411	56.917	21.1628	17.2421
779	298691	51	567.238	488.588	670.446	28.412	28.964	5.87	0.798	1.025	0	0	2.396	3.184	0.627	16.585	0	0.214	0	12.042	10.566	0	0	2.308	7.98	1.673	126.278	1.845	1.729	2.923	3.883	0	551.229	843.884	14.179	13.524	-7.35383	25.2812
780	300451	37	1296.58	1350.04	1485.96	111.023	29.37	14.677	17.754	0	0	9.047	10.887	30.148	34.156	87.984	15.141	2.775	0	104.715	19.131	8.83	5.538	37.491	22.191	14.093	399.476	10.695	5.363	4.146	86.607	197.673	2452.81	4634.67	3.55	60.721	14.5596	-2.01397
781	301745	51	2482.11	2494.15	2916.83	94.567	52.501	18.912	10.668	1.182	0	0	3.264	12.111	19.58	52.179	10.236	4.383	0	63.829	22.807	2.267	6.915	11.3	64.786	9.524	494.719	62.58	6.989	0	27.163	8.668	3448.92	6176.33	81.806	76.865	26.5437	12.5949
782	302024	44	2490.93	2487.57	2887.12	108.884	64.492	27.983	2.443	0	0	6.246	12.718	42.702	21.361	110.301	10.109	4.285	0.571	50.135	27.911	11.245	8.156	35.499	60.424	0	503.671	17.915	0.029	6.817	69.44	60.344	3638.99	6561.13	26.377	58.156	20.4558	1.43055
783	302404	44	1109.82	1146.71	1332.75	49.115	12.744	7.336	2.284	0	0	2.181	12.795	8.899	8.106	33.734	6.646	2	0	12.825	23.481	1.656	15.122	5.652	21.759	0	289.081	22.001	12.546	4.784	2.871	0.522	1803.84	3279.2	11.153	86.595	6.18719	22.2029
784	303191	32	1530.76	1506.08	1754.52	89.441	51.087	49.469	12.947	0	0	10.171	6.453	52.147	18.703	162.137	35.512	20.14	3.184	34.272	22.782	12.858	3.95	96.997	72.365	10.202	422.436	22.574	15.54	18.25	237.373	255.179	4556.48	8271.28	20.444	34.317	20.0208	-0.217696
785	303661	42	1374.94	1386.41	1473.32	65.141	24.533	101.398	4.093	0	0	134.228	8.703	13.956	6.963	59.21	6.358	21.618	0	32.854	18.342	3.07	3.113	0	80.532	29.871	320.651	31.41	8.007	15.741	9.878	34.838	1965.6	3573.5	15.946	133.333	18.2247	14.3839
786	303892	58	495.129	489.16	614.914	40.33	27.262	8.946	19.936	0.334	0	2.639	7.312	18.608	17.495	68.807	21.877	5.092	1.935	18.458	22.379	8.733	8.003	82.28	62.674	14.093	235.589	30.367	6.907	2.837	156.2	45.553	1251.72	2329.77	15.939	10.358	16.211	11.6219
787	304120	33	1267.85	1152.43	1432.97	46.012	17.257	10.213	10.521	0	0	5.853	10.161	24.051	3.398	67.794	1.78	12.873	0	17.044	18.268	0	0.595	11.201	18.331	0	255.578	25.619	0.124	0	8.796	33.375	1857.78	3400.97	10.639	59.007	13.1967	18.0625
788	305207	35	1699.12	1621.53	1875.08	82.966	20.82	20.847	1.249	0	0	20.582	5.993	17.286	33.813	300.203	0	0	0	2.381	7.079	3.176	1.84	3.34	33.031	22.254	3659.42	99.314	1.81	1.953	1.391	0	1149.38	2107.17	10.767	57.082	15.406	-3.16982
789	305684	57	764.539	770.066	873.504	20.486	12.168	7.449	0.827	0	0.577	2.92	3.756	3.14	3.037	0.047	2.586	1.204	0	5.722	6.44	14.234	0	0	2.764	2.656	98.99	13.728	2.131	0	12.253	5.496	721.514	1233.45	26.901	31.486	-10.0485	29.3335
790	305710	38	163.546	141.014	197.58	5.155	9.803	0	3.513	0	0.152	4.781	3.471	18.313	2.344	64.086	2.261	3.271	0	12.762	0.056	0	0	2.549	18.29	0	60.141	1.145	0.541	11.941	4.487	28.273	412.728	806.272	2.887	16.132	-5.17598	14.3394
791	305759	35	776.359	887.878	980.523	26.356	9.419	11.589	12.045	0	0.367	0	0.822	6.073	6.152	42.243	9.573	12.022	2.135	25.031	16.54	0.585	1.535	11.218	69.049	0.376	434.517	47.863	0	3.569	17.95	18.097	1822.28	3303.97	4.606	0	20.5715	21.344
792	305835	32	2433.65	2549.99	2838.86	94.276	42.918	17.721	11.969	0	0	8.942	9.571	15.258	20.543	53.984	6.766	4.697	4.143	19.748	31.731	0	1.832	32.969	41.771	11.623	574.246	43.111	15.669	7.898	98.363	63.805	4508.35	8657.58	0.881	30.19	18.6197	19.4857
793	306011	57	1015.67	1035.43	1136.84	67.512	30.046	12.295	4.761	0	0	0	0.781	12.481	5.146	37.447	40.892	21.278	2.119	34.37	26.085	30.363	1.652	102.936	34.986	7.968	254.792	17.237	12.587	0.41	102.918	119.401	1279.59	2136.7	43.745	29.617	9.676	6.83731
794	306361	48	3502.08	3578.38	3502.71	159.382	79.122	662.234	0.641	0	0	51.035	6.021	58.094	5.008	29.586	5.611	2.827	0.248	6.041	1.644	165.703	1.918	0	15.662	0	109.933	2.296	5.2	0	10.855	12.121	2678.53	4846.29	85.149	90.004	-7.53458	7.88261
795	306861	34	1183.71	1453.42	1423.02	51.82	30.52	11.13	0	0	0	0	1.048	8.403	2.508	34.598	1.517	12.062	0	10.297	12.36	78.704	2.848	3.213	27.407	0.691	109.382	11.71	7.854	0	15.106	10.479	1240.99	2436.19	38.792	40.569	-4.98973	6.89454
796	307139	48	523.204	444.526	507.456	42.525	8.498	0.209	6.031	0	0	5.658	2.012	14.757	16.319	76.057	6.922	6.694	0	10.451	2.744	4.951	14.926	4.036	2.989	5.635	70.717	2.821	3.661	0	17.69	49.943	442.671	737.677	0	27.722	-2.65587	11.3122
797	307869	31	1000.26	982.919	1048.62	38.303	4.946	11.363	14.25	0	0	0	1.139	2.134	11.724	18.258	0.182	2.397	1.591	12.49	1.516	2.425	0.752	2.252	8.93	1.055	107.473	21.201	4.676	5.866	3.503	10.957	1589.61	2868.21	17.924	38.488	-0.377446	28.5945
798	307928	37	2078.5	2071.68	2361.79	94.976	29.172	1.387	11.02	3.493	0	0	7.941	26.543	2.331	29.618	12.51	5.468	2.096	21.555	2.718	1.497	0.877	18.571	57.385	0	389.672	4.818	15.494	7.209	11.484	6.572	2873.59	5344.27	11.816	47.15	9.96473	17.8272
799	307988	46	1232.99	1131.93	1331.81	89.962	24.53	24.881	0	6.588	0	0	4.441	8.2	2.87	20.596	3.933	3.023	0	14.282	14.837	2.997	0	3.433	15.609	0	113.986	1.003	7.879	0.09	0	7.207	1401.98	2496.08	3.155	62.928	-6.19373	14.3628
800	308446	32	2208.51	2211.6	2473.25	83.568	24.322	14.526	0	0	0	8.836	9.078	29.316	24.315	46.77	14.712	18.035	0	14.181	10.729	5.428	2.149	13.211	12.216	0.241	173.068	19.666	6.877	12.855	11.537	60.62	1421.3	2670.88	0.908	30.943	7.86031	14.9664
801	308631	51	1948.81	1848.93	2371.76	82.386	83.444	33.402	9.009	0	0	2.44	14.024	12.963	3.223	52.376	7.321	2.096	0	23.231	28.266	6.06	6.636	16.37	25.362	5.416	458.591	19.546	5.579	6.098	48.899	107.117	2838.79	5035.21	22.723	56.765	13.6039	13.2899
802	309037	32	3521.34	3943.22	4181.6	140.982	27.728	19.148	12.563	0	0	0	6.759	36.904	6.573	50.126	16.46	3.203	0	29.255	47.972	1.736	9.896	4.319	23.451	5.713	508.664	20.691	5.725	3.131	33.911	272.556	2727.89	4536.65	5.009	60.08	18.672	15.2186
803	310288	54	1218.25	1265.19	1407.67	63.237	30.041	19.225	6.205	0	0	1.524	2.867	15.424	16.478	37.518	63.336	3.396	0.972	39.656	15.4	0	10.133	0.726	19.304	8.38	275.511	32.089	0.531	0	17.86	18.346	1538.87	2675.83	20.711	47.065	15.6478	20.2392
804	311900	69	2818.02	2626.3	3013.14	160.155	62.567	30.304	30.143	0	0	0	16.044	32.321	19.337	82.026	12.731	18.477	0	70.885	18.44	15.837	9.159	26.284	98.542	0.242	588.727	83.071	1.671	12.664	88.98	69.117	3857.5	6785.17	27.241	108.491	26.4653	0.744367
805	312124	67	1985.53	1834.23	1987.1	92.033	33.067	22.761	11.839	1.311	1.102	0	12.069	38.302	11.06	63.808	12.3	7.976	0.634	38.759	12.782	2.006	2.988	17.846	32.818	0	436.844	16.845	3.499	3.256	55.292	52.365	2742.8	4980.61	21.584	72.735	19.2468	14.8819
806	312266	60	1105.85	1088.84	1309.74	61.484	23.169	5.867	11.654	0	0	16.354	15.262	71.859	32.298	254.32	13.273	12.229	1.315	26.599	45.77	35.002	17.754	22.06	37.064	2.577	240.087	26.754	26.683	13.139	14.69	40.715	1144.98	1971.59	14.655	59.02	17.9072	-3.12275
807	312272	51	1262.53	1229.22	1244.88	31.701	14.007	35.964	23.7	0	0	13.009	0.511	6.638	17.609	41.637	6.079	4.909	1.13	10.293	11.665	1.039	1.07	1.972	14.741	1.898	137.704	13.817	0	0	31.648	8.011	1276.64	2554.86	30.946	70.457	-0.876163	19.7121
808	313763	32	5096.95	5629.58	6097.67	262.158	64.102	28.867	0.791	0	0	4.995	7.155	808.979	1.156	9.413	0	9.015	1.703	9.075	1.188	13.503	3.562	3.178	17.049	0	306.852	2.683	0	0	0	44.477	2641.44	4436.12	12.718	39.675	-17.633	9.11877
809	314031	30	1421.73	1550.75	1697.82	80.819	26.113	17.271	2.748	0	0	3.044	9.332	15.668	3.482	22.799	4.651	0.836	0	11.041	2.017	3.419	9.286	8.143	17.028	5.755	192.966	15.431	0	2.734	1.833	0	1165.82	2162.67	56.47	46.622	5.25536	15.9042
810	316049	51	1876.25	1794.18	2260.52	82.396	26.087	14.68	61.998	0	0	10.203	8.809	58.656	34.659	157.769	16.88	1.319	0.695	63.425	33.196	12.76	4.887	11.309	69.885	0.255	510.778	44.19	3.547	3.575	13.636	50.885	3082.26	5437.87	8.742	88.187	25.2382	-1.72361
811	316189	67	2492.42	2495.52	2875.59	163.331	43.528	36.414	11.767	0	0	16.16	18.278	55.294	16.777	211.741	22.373	28.183	12.363	55.101	16.146	7.385	14.742	64.493	76.941	0	741.11	58.294	28.787	15.744	167.69	365.219	4275.74	7636.84	11.247	59.888	27.9832	-0.0828203
812	316458	33	1104.31	1120.53	1225.02	53.326	26.379	15.21	10.39	0	0	7.267	3.175	36.417	17.693	92.727	10.755	6.058	1.436	10.387	17.415	2.249	2.176	10.093	14.82	0.022	144.962	7.024	5.928	9.823	19.564	6.216	1365.74	2460.28	14.806	52.106	6.53321	15.2746
813	317285	60	1992.8	2044.74	2387.12	109.366	53.89	12.28	7.3	0	0	7.411	18.825	38.974	17.614	75.312	10.669	3.844	0	37.726	30.25	3.721	0.451	12.499	34.844	5.773	352.241	23.996	2.434	28.51	18.077	33.004	2269.26	4183.05	33.396	100.953	19.74	14.1502
814	317813	40	2460.06	2288.35	2600.7	71.321	20.466	7.993	0.151	0	0	41.678	4.265	2.633	0	369.369	5.085	0.584	0.906	4.98	0.368	6.211	0	0	28.791	0	23.995	0	0	1.529	7.868	0.841	1186.6	2079.66	6.224	33.099	-0.496933	7.59376
815	318476	24	322.995	328.754	367.26	21.593	9.165	0	0.582	0	0	0	0	14.171	0.896	14.394	0	0	0	0.246	5.935	0	0	1.904	11.91	0	74.365	3.08	7.541	1.059	0	4.18	349.889	741.105	0.631	16.277	-8.47327	17.6135
816	319173	62	3079.84	3039.11	3344.8	178.91	38.87	18.692	15.839	0.957	0	15.274	3.225	28.244	21.486	83.493	0	7.635	0	71.322	18.399	6.132	9.36	4.806	65.443	4.553	469.416	49.984	14.32	4.06	14.208	42.446	3922.55	6940.23	75.502	108.515	25.4397	8.90645
817	319174	55	1938.07	1828.71	2133.5	82.42	48.801	16.624	8.17	0	1.298	3.789	7.975	39.119	11.122	44.644	7.915	13.238	0	26.126	41.498	2.369	4.797	4.544	54.407	7.102	290.064	19.798	3.71	0	14.862	5.565	2488.4	4535.3	19.627	61.416	18.2871	16.5355
818	320141	59	1573.05	1512.5	1748.58	90.632	34.467	11.257	13.098	0	0	2.82	19.869	26.882	18.303	53.383	12.305	1.645	0.157	50.619	35.32	0	0	5.323	50.404	0	272.78	30.37	5.295	5.9	29.022	42.666	2354.74	4281.52	73.429	60.575	21.4193	17.788
819	320719	64	3350.04	3308.75	3809.28	163.152	47.019	52.139	8.253	0.951	0	41.211	0.869	33.536	20.71	52.626	4.134	4.058	2.113	23.724	18.39	36.635	1.452	9.508	63.153	10.205	419.797	36.688	5.292	9.125	17.986	30.987	3076.89	6040.73	26.666	87.741	15.8248	0.943713
820	321360	40	2212.44	2164.08	2653.49	103.163	29.589	15.457	11.678	0	0	13.137	18.747	4.235	11.798	95.984	14.473	19.994	0	37.765	17.012	45.099	0	8.854	34.96	6.709	320.713	13.923	4.104	8.482	8.226	7.511	2290.77	4312.43	34.647	73.042	7.95306	-0.56315
821	321467	34	2624.32	2609.6	2937.9	115.934	23.738	22.262	12.947	0	0	5.81	21.831	45.863	8.324	107.649	12.375	19.006	1.968	51.034	20.767	10.906	10.045	9.122	28.64	21.237	521.528	16.493	13.467	5.128	42.985	28.693	4166.2	7271.97	13.486	118.8	16.9646	4.20969
822	321793	41	2173.35	2285.49	2619.92	98.405	32.409	33.181	0.198	1.621	0	22.799	0	170.303	5.405	12.597	4.859	11.619	0.63	0	0.847	4.079	1.139	1.034	0	6.115	61.801	4.829	0	1.098	5.665	23.546	848.374	1571.62	5.635	39.103	-19.3258	16.0269
823	321869	34	972.971	906.056	984.248	58.527	7.576	12.209	0	0	0	2.143	5.182	19.407	6.152	46.345	1.07	8.566	1.542	17.764	3.517	0	0	0	26.435	0	134.102	3.267	1.994	2.558	12.948	4.878	1002.26	1865.82	10.023	33.458	-2.31643	14.4755
824	322127	34	1121.13	1027.18	1094.25	74.185	16.281	17.907	2.239	0	0	0	4.238	11.041	0	40.247	11.756	0	3.231	22.589	1.981	0	0.473	0.269	17.364	7.698	198.124	18.058	3.15	0	1.712	0	1099.26	2080.45	5.1	40.599	8.83814	22.6025
825	322232	29	1023.51	1105.67	1202.14	43.654	38.751	18.231	2.986	0	0	0	0	6.699	2.52	36.181	4.923	0.947	1.848	18.163	0.815	0	0	1.249	30.749	4.602	373.934	21.124	1.899	2.047	3.132	0	1724.17	3006.01	14.856	12.397	11.2356	24.5954
826	323491	38	1197.85	1059.22	1296.06	56.758	32.75	18.402	3.737	2.928	0	0	5.332	12.224	4.755	17.983	3.432	2.584	0.767	11.42	8.557	0	2.499	7.486	22.419	8.464	195.379	20.222	6.763	0	3.187	5.395	988.488	1855.22	12.462	45.557	6.46395	20.8884
827	323503	34	1059.65	1003.01	1051.96	33.928	14.581	10.447	10.134	0	0	0	22.327	8.088	12.532	36.552	4.334	4.612	0.875	22.036	3.099	20.705	0	6.608	12.649	0	142.24	11.327	5.591	1.098	33.082	88.265	2357.34	3989.38	27.868	53.078	3.62322	10.4988
828	323792	36	958.21	1062.01	1024.8	71.281	19.184	8.609	0	0	12.467	0	5.685	17.654	2.263	15.847	0.59	1.629	0	19.757	4.839	0	1.19	4.703	33.831	0	157.428	12.116	0	0	11.787	4.479	741.45	1412.54	14.609	105.398	7.19338	19.9717
829	325120	73	1919.4	2149.95	2249.59	107.876	61.53	28.01	30.084	0	0	13.581	17.682	36.483	24.056	135.377	34.59	15.861	0	54.077	16.082	8.581	3.076	17.913	60.996	7.634	409.062	29.018	11.606	18.629	51.742	261.224	2670.86	5188.72	36.596	93.841	21.1053	2.0432
830	325980	46	1563.8	1534.17	1829.97	72.871	23.377	16.123	5.582	0	0	0	6.224	9.985	4.453	17.622	9.635	1.17	0	31.766	22.46	11.886	0	0	44.198	1.247	246.277	5.008	8.218	4.508	16.171	7.029	1398.88	2523.01	33.068	59.602	3.00467	13.0084
831	326971	32	2031.56	2118.56	2442.7	73.46	42.714	21.745	8.158	1.337	1.914	0	6.963	24.363	7.992	77.604	7.994	5.151	0.59	26.025	6.931	2.695	0.098	4.867	63.237	1.65	311.134	29.701	8.394	6.552	7.721	92.193	3276.46	5400.38	31.6	46.705	19.379	14.2404
832	327444	33	1983.55	2137.03	2293.39	87.352	42.548	16.458	1.519	0.459	0	2.118	7.507	16.955	13.421	58.779	3.345	13.855	1.807	22.638	2.954	9.583	17.599	1.025	16.864	7.128	180.029	15.936	0.863	0.783	14.84	18.478	1720.11	3221.31	5.757	81.216	8.64024	12.5595
833	328415	27	880.276	794.747	927.979	53.696	19.82	4.248	5.273	0	0	0	3.708	14.782	12.981	27.317	5.159	8.329	0.638	16.65	7.281	0.875	0	5.059	12.007	1.167	195.687	13.118	0.52	2.578	7.352	33.98	1299.77	2312.54	15.8	51.402	6.74244	19.1444
834	328997	39	1883.68	1866.59	2069.3	99.256	27.258	16.347	9.419	0.312	0	7.136	20.721	17.73	5.114	38.299	5.67	5.771	0.065	51.475	13.947	0	1.818	15.487	56.406	0	330.913	12.108	7.868	0.319	14.668	6.847	2096.6	3957.82	18.26	47.231	15.7003	22.1521
835	329214	51	1629.25	1442.57	1616.66	63.273	24.216	18.542	0	0	0	0	12.177	20.012	11.159	55.206	10.73	25.512	0	26.491	0.501	5.529	0	7.265	31.092	0	145.854	3.154	13.648	0	24.487	26.43	1539.67	3049.66	10.302	32.98	4.65229	12.8652
836	331282	33	536.005	512.942	668.074	33.995	12.635	6.323	0	0	0	0	0.472	17.166	4.139	18.124	0.988	0	0	5.015	6.592	0.051	0	5.119	20.293	2.336	206.142	11.392	0	0	4.544	16.034	779.766	1175.28	2.591	48.187	-1.35324	17.4862
837	332560	57	1597.73	1663.58	1835.83	88.611	43.516	31.302	26.876	3.72	0	17.819	17.382	24.499	32.277	83.109	6.692	18.947	2.043	78.429	9.89	16.923	0	6.888	60.91	0	373.284	40.634	14.136	10.362	20.299	82.154	2455.01	4686.35	42.412	79.877	18.9741	1.54137
838	332632	30	1551.03	1664.94	1925.83	63.652	15.707	16.886	1.507	0	0	0	8.194	13.551	1.944	9.126	8.237	4.985	0	21.397	6.054	10.697	0.525	0	16.499	0.391	138.097	6.923	2.96	10.798	19.003	9.527	1326.08	2468.67	59.667	42.713	0.878446	14.018
839	333091	59	4916.16	5283.04	6078.72	255.21	65.001	26.374	0.305	2.583	0	2.289	3.714	36.394	29.395	100.104	29.031	15.079	0	19.803	13.934	4.562	10.354	20.758	24.363	13.113	344.248	38.146	17.068	17.148	26.639	279.753	3817.18	6985.18	25.234	98.672	16.2835	10.5457
840	333492	31	2113.66	2209.99	2399.46	125.026	24.83	26.502	15.711	0	0.512	6.854	21.995	29.745	13.372	169.448	19.675	13.005	0	41.919	30.026	0	1.497	20.986	56.943	5.923	625.436	75.931	6.396	3.275	55.747	62.175	4386.17	7515.52	0.13	28.507	28.3787	10.3816
841	334710	44	2275.38	2435.51	2760.47	150.027	53.717	19.772	2.835	0	0	11.531	1.712	27.979	13.715	50.795	1.513	9.963	10.682	52.277	17.576	0	0	4.27	44.407	2.651	352.283	44.316	8.225	4.278	22.848	23.804	2142.85	3913.74	23.822	85.398	23.0607	17.6567
842	335190	47	2149.31	2035.25	2487.11	101.071	29.958	9.215	0.821	0	0	0	4.226	14.708	12.354	27.949	3.966	21.763	0.303	43.474	9.096	0	0.602	1.005	39.392	0	370.543	10.46	9.347	2.426	9.478	12.324	2127.3	3680.23	60.735	46.811	14.2513	21.6248
843	335772	38	786.923	873.827	942.068	40.803	12.962	18.648	0.698	0	0	32.809	4.919	1.952	2.752	19.23	0	0	2.756	5.983	2.344	4.393	2.68	0	12.52	1.423	65.67	0	0	5.89	46.611	0	1151.8	2106.28	14.325	82.928	-7.35995	23.644
844	335869	39	2211.41	2179.73	2528.75	91.77	51.188	19.144	13.78	0	0	13.884	17.182	71.996	19.466	176.662	15.172	8.878	0.067	54.061	7.6	2.719	5.081	19.182	46.147	3.88	378.529	29.621	20.02	8.543	61.881	23.035	2441.25	4744.02	15.803	116.418	24.1649	6.07979
845	335888	66	1901.87	2008.38	2249.82	100.696	24.632	24.999	13.869	0	0	96.006	17.979	73.543	38.801	221.087	32.636	14.626	8.082	24.071	32.652	14.457	5.242	26.135	54.728	8.478	436.008	17.157	13.888	5.452	34.779	37.441	1676.77	3301.55	62.93	232.089	19.6963	-1.82143
846	337227	34	444.932	415.981	496.463	26.66	8.786	4.645	1.977	0.1	0	11.813	0	1.626	0.614	21.4	9.452	4.439	0	13.799	38.845	6.327	3.319	0	13.381	0	223.476	9.285	6.787	8.741	13.837	1.55	817.1	1414.43	13.546	0	1.04291	27.0097
847	337298	55	1335.64	1446.38	1590.19	81.111	29.613	5.841	12.744	3.208	0	0	10.652	15.836	39.624	82.67	15.1	11.163	0	27.433	32.611	11.222	11.976	12.886	19.491	8.06	268.303	29.281	11.229	0.33	55.482	25.98	2677.97	4458.5	44.02	84.046	12.7598	5.9782
848	338214	34	1086.26	1137.44	1194.12	60.826	32.307	18.337	3.227	0.674	0	40.856	0	13.483	2.29	34.204	4.637	0	0.251	6.35	2.335	190.764	0.291	4.127	33.093	0	130.222	5.254	0	4.367	0.838	3.913	1099.65	1680.56	39.712	104.587	-6.67155	6.95776
849	338330	88	2328.09	2354.9	2601.82	132.977	43.443	46.524	22.501	1.53	0	11.566	11.016	47.198	43.267	165.022	31.879	10.504	5.902	52.472	17.705	0	9.87	17.821	53.117	0.928	642.158	27.361	6.83	7.765	39.94	138.36	4216.78	7542.13	43.241	67.531	24.9759	13.2265
850	338864	36	1141.93	1137.76	1239.52	59.822	25.373	6.824	0	1.084	0	0	14.279	14.243	0.684	32.618	2.05	16.335	0	15.584	9.726	11.91	0	0.305	19.169	0	180.852	20.384	5.799	0	6.992	0	1111.95	1861.39	74.496	40.302	4.91322	11.9344
851	339155	79	970.186	1002.35	1186.79	72.167	8.86	8.701	3.79	0	0	0	7.651	12.721	20.557	50.371	12.11	7.168	0	22.008	13.302	0.723	6.694	9.45	27.968	10.51	331.428	14.228	6.011	4.236	17.917	46.365	1390.19	2699.21	15.633	56.842	12.8025	20.6483
852	340356	53	629.514	695.069	768.256	29.516	18.819	5.803	11.253	2.66	0	0	0	1.384	21.108	40.611	0.952	0	0	12.826	3.622	6.276	6.692	10.005	15.623	12.505	143.954	11.795	2.961	4.055	8.431	18.915	641.157	1268.23	7.94	32.114	0.758324	25.9584
853	341245	57	1427.39	1452.89	1588.56	70.643	24.504	7.35	17.786	0	1.645	3.477	4.756	20.584	9.736	80.608	16.261	6.476	0	23.575	18.159	102.612	0	0.885	50.467	0	308.099	39.832	5.188	11.096	16.259	2.107	1433.82	2965.24	49.801	88.209	13.8222	0.338042
854	341437	60	1137.46	1285.16	1460.91	56.452	22.99	24.062	15.058	0.706	0	13.251	15.571	20.291	19.701	55.58	21.717	20.516	0	32.923	25.796	13.885	0.723	8.323	33.6	19.124	335.63	16.589	0	4.755	23.392	156.579	1924.88	3421.48	33.811	46.7	13.4322	6.40085
855	342366	43	1140.85	1215.64	1293.83	60.283	35.762	12.729	12.306	3.492	0	14.62	10.974	17.988	10.534	41.617	20.804	6.663	1.266	12.588	19.007	0	3.837	8.474	24.506	0	240.658	8.592	0	7.28	11.533	19.038	1729.52	3059.01	20.06	39.796	6.11851	19.4849
856	342602	43	1003.14	1004.06	1238.76	53.357	32.137	19.024	22.736	0	0.03	18.528	0.701	10.025	1.866	57.188	0.158	1.872	0	23.16	17.526	4.399	3.604	4.723	26.584	0	191.164	12.768	2.367	0.127	2.116	8.55	1186.44	2190.89	2.617	47.034	11.1316	15.2607
857	342840	55	1034.67	996.943	1178.62	58.152	27.094	10.312	9.496	0	0	26.159	8.163	20.745	25.049	86.843	6.533	7.921	0	10.395	19.681	11.226	1.378	13.936	11.546	1.312	219.245	17.107	14.463	4.736	11.78	16.138	1071.32	1980.97	13.468	46.308	10.4355	5.65273
858	343927	35	1013.23	964.656	1068.9	57.096	30.353	8.39	9.149	0	7.486	12.536	11.302	17.152	2.793	45.229	2.219	3.776	0	19.962	13.22	3.825	0	0.486	19.791	1.454	107.634	4.418	8.081	3.194	5.547	11.347	1351.56	2751.38	15.649	52.544	6.66995	16.2457
859	344088	39	772.093	741.787	951.564	55.681	18.783	3.942	14.386	2.41	0	0	7.625	28.139	9.613	107.047	2.518	12.237	0	13.859	30.751	4.765	0	15.595	19.575	0.625	222.415	26.084	9.13	3.6	10.103	89.639	910.034	1593.65	10.126	37.928	8.21183	14.4793
860	344708	35	2840.34	2878.83	3236.15	128.942	42.498	39.875	3.146	0	0	4.214	10.801	21.417	12.896	67.701	19.114	13.65	0	43.721	26.088	7.537	0.667	19.474	52.489	7.794	551.37	49.388	15.409	13.772	36.105	23.978	4227.12	7791.45	76.144	81.555	24.2452	9.10595
861	344785	51	1943.92	1982.7	2239.88	62.171	36.887	19.963	11.72	0	1.138	0	13.345	50.76	57.709	111.647	41.039	16.262	0	55.566	32.147	11.82	11.836	25.376	53.923	3.236	305.606	17.946	31.162	33.921	28.81	38.521	2865.78	5166.88	3.266	94.082	17.1947	3.9349
862	345156	28	2361.19	2575.99	2872.9	114.742	27.872	1.977	0	0	0	0.618	6.406	27.621	8.555	29.001	5.26	0.684	0	46.153	3.136	2.503	0.255	0.354	47.147	0	302.53	22.01	0	0	0.078	0	2428.29	4500	33.098	69.905	17.4473	15.5205
863	345573	63	1002.36	1140.72	1176.38	76.801	14.654	7.592	15.268	0	0	0	8.63	26.244	4.164	34.895	10.413	0	0.672	10.67	14.844	0	4.691	11.926	49.324	3.247	259.249	15.312	8.09	7.726	16.611	25.788	1537.86	2944.43	13.057	42.247	11.4181	20.3402
864	345819	43	1771.73	1861.51	2064.66	67.784	46.359	21.529	0.176	0	0	2.937	4.838	26.906	0.066	19.659	5.739	6.828	0	14.788	16.022	7.687	0	6.137	22.258	1.837	207.4	8.786	6.866	0	12.945	7.26	1134.88	2192.11	17.393	51.611	5.17826	14.4439
865	346345	29	2054.97	2067.81	2311.33	137.464	37.971	20.973	1.833	0	0	0	14.564	20.24	13.526	68.818	4.328	2.304	4.066	16.773	11.212	0	5.672	17.059	37.836	0.8	381.425	38.152	14.284	2.304	30.173	6.765	3024.73	5507.65	9.509	49.673	16.6186	18.5764
866	346992	32	2013.97	2015.08	2112.28	101.607	25.225	20.482	4.464	0	2.222	0	4.335	33.765	8.559	73.443	7.044	8.2	0	26.431	10.966	13.84	8.845	3.158	44.439	0.148	428.201	21.415	0	4.125	24.167	245.298	3182.4	5835.6	36.789	58.772	15.7337	7.06775
867	349429	54	1566.4	1592.13	1811.95	61.036	42.124	0.482	1.883	0	0	0	4.005	7.141	14.513	39.561	0	12.628	0	21.824	29.84	0.603	0	0	29.221	7.98	219.269	31.98	10.404	13.045	24.197	67.124	1839.63	3415.27	22.977	58.046	10.8488	24.4913
868	349432	59	2314.01	2240	2462.72	157.799	53.985	16.492	14.293	2.755	1.228	0	22.083	20.056	23.191	115.273	5.697	6.079	10.257	34.035	31.07	22.039	27.155	18.576	28.328	3.661	318.163	32.452	14.52	11.149	54.135	85.405	3549.41	6131.1	55.633	74.941	13.5559	3.84316
869	350865	57	2350.93	2443.86	2576.99	79.568	41.574	2.116	5.815	0	0	43.155	2.224	3.297	8.997	924.482	8.427	6.007	3.546	23.272	0.632	891.911	4.785	1.228	38.077	30.486	5284.28	30.748	0.176	0.916	11.163	0.033	1252.48	2153.08	31.978	91.761	-21.0995	-6.40747
870	352000	35	1536.54	1530.59	1691.01	60.405	25.271	22.198	0	0.376	0	4.759	6.819	17.453	18.197	35.036	6.122	2.989	0.639	24.567	6.244	27.932	5.037	2.895	44.193	1.385	351.481	29.064	10.897	10.941	19.165	5.925	2317.69	4147.11	46.09	98.763	11.7139	7.62739
871	352309	63	856.962	977.55	991.377	60.443	11.752	6.647	0.407	4.539	0	0	6.365	15.18	11.197	39.257	2.109	4.052	0.733	15.31	22.479	0.894	0	12.136	8.448	0	158.909	9.44	0	0	0	1.139	879.167	1878.04	28.833	38.122	-2.40737	19.2883
872	352666	50	1059.04	1018.9	1079.55	43.465	22.731	14.89	6.906	0	0	0	8.855	18.823	78.37	79.536	3.931	5.67	0	31.075	17.618	11.071	7.407	16.5	25.69	1.145	183.108	30.05	2.103	7.43	36.217	35.515	1487.41	2709.22	2.7	38.302	13.1112	5.87583
873	352941	78	1157.31	1223.02	1337.88	54.424	28.175	20.077	8.608	0	0	4.921	0	6.303	14.539	43.78	2.762	0	0	33.992	33.788	0	4.124	0.327	34.159	4.8	267.04	31.636	12.374	0	2.528	1.765	1548.29	2690.82	8.055	67.368	14.4803	25.0038
874	353211	26	369.62	339.444	478.998	15.211	13.039	0	0	0.604	0	0.512	2.378	1.782	2.092	2.242	0.255	0	0	3.662	3.749	0	0	0	4.327	0	43.09	0	2.122	0	8.997	1.815	442.954	720.847	15.288	0.036	-13.5556	25.2135
875	353244	41	742.216	780.026	800.819	54.932	23.19	2.741	7.468	0.013	0	52.893	6.675	32.226	3.246	15.847	0	9.193	0.324	6.864	1.955	0	9.908	7.798	6.443	0	49.306	10.193	0	6.283	12.841	0	893.963	1628.39	9.078	67.717	-6.42001	17.2452
876	354044	34	4036.29	3845.67	4424.11	193.591	49.996	24.079	0	0	0	40.176	2.718	0	1.776	191.069	3.505	1.871	0	14.934	0.418	57.766	1.322	2.206	4.887	1.035	669.995	5.945	1.116	0	7.083	9.45	1460.68	2589.78	10.818	34.376	-1.09778	-0.688425
877	355565	34	1317.24	1260	1474.11	63.606	25.292	9.987	6.763	0.055	1.082	0	16.028	20.391	13.592	46.402	9.274	0	0	34.402	13.366	1.115	7.264	3.763	28.779	5.165	250.439	32.472	15.288	10.17	2.95	19.133	1863.37	2967.77	0	47.211	16.3361	19.7567
878	355869	50	2431.13	2428.76	2863.36	118.9	42.753	25.769	9.845	0	0	22.828	11.945	72.492	11.07	115.81	7.064	15.645	0	63.646	21.86	12.809	16.083	20.841	98.408	2.212	423.472	40.588	11.471	14.633	25.918	28.005	3556.08	6063.56	25.897	87.322	25.2088	-1.56614
879	356269	28	52.99	50.828	58.473	4.984	3.026	7.761	13.965	0	0	2.439	0	4.637	0	8.827	0	0	1.359	9.382	0	0	4.472	11.946	4.194	0	109.297	0.883	0	4.404	2.175	11.907	531.223	812.214	15.145	8.074	-9.58552	20.9504
880	356572	36	1471.96	1454.04	1587.81	86.232	20.554	10.458	0.167	2.213	0	0	8.258	4.595	4.119	34.122	4.638	3.172	5.281	30.552	15.979	0	1.447	5.954	32.571	0	276.486	17.941	6.322	0	24.003	8.82	1855.69	3282.59	11.445	25.008	10.1689	25.5554
881	357486	31	754.08	831.48	895.18	41.018	26.818	3.59	6.192	0	0	6.903	15.117	13.01	3.515	9.171	5.449	0	0.537	10.761	11.258	2.085	1.059	3.694	30.495	0	204.911	14.476	3.332	0	13.866	0	1105.11	2247	28.712	35.67	0.290256	17.0559
882	357791	61	1915.72	1819.33	2045.6	99.768	44.972	29.677	2.214	0.639	0	1.768	23.996	40.406	16.932	147.985	15.789	11.648	0	48.299	20.489	22.091	12.429	20.864	51.749	4.069	458.547	24.447	14.755	12.088	28.912	396.085	2820.55	5538.44	22.753	100.006	19.3753	-0.642257
883	357869	56	1154.73	1113.81	1142.4	75.161	19.977	10.08	0	0	0	0	5.574	9.829	9.572	15.849	0.874	0	1.663	17.399	3.039	0.51	0	4.879	24.564	2.746	197.91	10.972	4.301	0	10.05	5.53	1525.97	2743.82	18.598	66.348	0.203029	17.6155
884	358215	36	2503.06	2433.66	2650.59	102.975	31.083	19.953	13.422	0	0	24.741	2.85	4.245	2.346	43.018	7.133	0.651	0.386	24.432	19.689	3.733	0	21.975	24.623	1.674	400.36	29.439	11.779	5.059	11.581	8.033	2320.71	3892.54	13.792	7.86	11.9526	26.0177
885	358565	52	1682.83	1790.36	2073.18	98.577	17.436	10.619	0	0	3.1	22.868	14.364	11.011	3.356	38.326	8.823	9.855	0.256	25.502	8.232	4.642	0.89	5.176	44.28	2.387	239.1	20.631	5.652	0	18.25	33.611	1612.21	3040.26	32.11	52.452	12.3163	14.1645
886	359843	29	810.62	988.388	971.956	49.769	14.465	3.095	0.988	0	0	6.804	6.13	3.222	16.881	42.346	14.68	5.15	0	11.735	5.289	6.566	1.293	5.299	21.864	7.537	178.816	9.677	2.907	1.625	6.366	8.765	1275.41	2057.03	9.008	34.5	0.633444	25.4103
887	360574	38	1587.12	1532.46	1771.68	113.544	28.489	19.001	2.604	6.016	0	6.969	6.115	27.456	10.729	34.85	7.496	10.78	0	30.649	0.234	2.153	0	0	58.99	0	269.973	16.496	6.622	1.557	5.473	21.934	1478.71	2518.39	42.122	73.902	17.7711	17.0549
888	362340	51	471.949	541.856	678.464	38.546	11.724	1.199	3.227	0	0	13.156	3.258	28.063	36.337	62.42	24.574	3.472	0	25.121	16.673	8.975	6.611	1.63	8.482	7.278	112.771	4.69	5.694	15.795	10.06	34.371	493.757	1035.62	13.821	34.935	5.5487	10.72
889	362730	48	1283.32	1448.83	1388.13	93.838	40.086	15.199	13.123	0	0	0	17.541	14.433	11.456	86.278	18.564	1.431	0	35.973	6.681	6.965	6.846	4.014	62.419	4.217	351.387	19.795	9.217	4.557	26.858	80.84	2137.65	3729.86	24.853	53.489	18.1717	6.35465
890	362787	58	1061.58	1121.04	1215.73	63.623	16.629	10.001	3.813	3.13	0	27.336	0	22.573	6.278	20.306	3.637	8.762	0	19.812	3.921	3.003	0	6.267	33.38	4.269	235.396	6.942	0	0.44	7.693	0	919.927	1941.97	30.578	34.956	8.60768	17.8099
891	362818	31	1154.64	1232.71	1518.51	54.616	28.127	5.764	3.183	0	0	0	0.737	5.544	0.906	27.122	12.53	1.378	0.736	6.66	7.883	0	0	2.591	17.576	0	290.687	12.287	5.045	0.191	33.388	18.001	2426.75	4387.48	37.865	23.449	0.936436	21.0581
892	363466	25	761.63	797.669	828.179	17.685	18.063	3.339	0	0	0	3.966	0	5.324	2.065	19.264	0.569	0	0	18.563	0	0	0	1.292	12.483	0	73.727	27.524	2.738	0	0	0	666.694	1097.15	27.232	1.401	0.603467	29.8369
893	365101	45	1478.54	1541.4	1739.59	81.296	31.124	5.061	45.138	0	0	0	13.483	30.459	13.03	72.558	2.004	1.518	1.755	24.211	18.652	2.652	13.215	23.551	41.72	6.243	407.913	16.418	9.81	15.336	40.306	68.072	2150.24	3865.55	17.357	70.819	17.1925	15.1523
894	365653	38	1620.07	1714.23	1815.53	62.213	32.31	13.638	12.84	1.833	0	2.637	6.662	14.785	20.633	40.459	2.049	12.04	1.841	9.676	5.18	1.522	5.733	12.119	37.655	3.734	147.026	16.099	14.014	14.767	10.673	7.161	1236.42	2377.41	30.878	33.501	5.1567	20.9823
895	365792	38	1149.39	1203.56	1382.33	56.83	30.903	5.138	2.48	0	0	0	6.291	12.44	1.706	31.33	2.499	0	0	36.885	0.811	0	6.861	0	20.204	5.543	155.398	7.53	6.091	4.066	20.725	22.17	1223.16	2093.63	38.34	45.904	8.41672	21.1045
896	366960	36	903.038	818.073	960.562	60.932	17.951	13.322	8.116	0	1.383	9.636	5.045	17.876	10.805	71.43	0	6.441	0	16.178	8.649	3.575	7.518	0.802	33.395	4.294	287.465	8.356	1.43	0.304	15.473	76.065	1135.25	1800.39	28.176	27.991	11.7888	16.1419
897	367287	32	1317.85	1355.09	1507.96	55.194	39.834	9.829	10.281	2.145	0	6.255	4.914	57.418	43.53	226.014	27.812	9.709	0	61.896	15.658	13.647	12.119	35.004	67.362	12.022	442.186	45.625	9.481	7.478	61.92	83.325	2577.79	4649.42	20.128	49.004	24.8282	-2.23919
898	367920	59	756.344	828.221	877.981	61.508	11.462	6.393	6.886	3.662	0	12.287	6.098	3.602	0	56.964	6.705	11.26	0	6.056	10.94	0	6.758	6.637	22.651	0	200.963	14.918	3.545	1.079	6.027	4.945	948.98	1875.26	24.293	50.94	2.07434	24.6589
899	368120	47	1581.78	1455.33	1763.68	95.069	20.093	23.971	13.979	0	0	0	4.814	13.896	7.345	43.487	3.757	3.447	1.286	43.373	28.737	0	2.636	6.016	27.829	1.38	285.313	29.18	7.58	0	10.448	16.128	2177.95	3689.08	20.037	48.058	17.0328	20.8822
900	369642	52	1790.13	1799.65	2020.29	80.685	30.679	26.48	21.771	3.162	0	0.108	25.471	76.838	28.87	179.236	24.036	13.996	1.018	51.081	11.591	7.081	3.512	16.891	83.109	5.227	324.445	65.8	12.551	12.649	21.001	47.266	2468.25	3952.77	18.083	75.247	27.575	4.4252
901	371184	37	962.658	1114.45	1168.72	56.672	39.023	23.273	0.604	0	0	0	5.167	8.764	8.788	36.883	1.143	3.523	0	20.793	19.223	0	1.128	14.05	43.426	0	205.603	11.118	4.868	7.846	12.008	7.05	1508.21	2814.71	12.8	49.48	7.19495	23.8766
902	371337	46	1473.32	1413.38	1522.46	75.553	33.668	13.656	19.489	0	0	3.298	16.667	35.918	24.313	90.904	27.255	8.61	0	41.894	44.951	33.223	8.818	29.462	22.206	7.263	360.869	21.756	10.397	14.418	19.485	219.123	2083.09	3824.57	7.262	66.553	13.5032	3.01425
903	371536	52	475.052	485.98	558.175	27.018	12.489	0.649	0	0	0	12.153	17.263	7.665	11.162	43.684	10.439	5.561	0.321	7.567	5.932	1.367	0	11.259	16.196	0	113.486	4.37	7.159	4.443	17.903	5.315	375.325	776.116	4.315	35.764	-4.13091	17.5639
904	371543	36	1171.11	1098.26	1219.8	45.191	25.721	20.401	5.276	0	0	13.513	7.245	13.321	9.068	15.6	3.376	5.687	0	17.889	1.929	0	3.069	1.388	16.722	1.566	114.111	6.197	0	0.089	31.016	10.959	1038.43	1745.43	18.579	37.772	-3.96048	16.0983
905	371756	26	632.996	664.122	732.926	20.307	9.184	0.264	0	0	0	11.265	9.389	18.589	6.6	44.126	5.601	8.425	6.425	19.203	3.206	0	0.414	7.213	23.405	0	94.072	14.005	16.626	0	7.968	17.94	722.826	1048	4.493	40.585	7.57135	19.307
906	372575	33	3401.16	3904.79	4233.69	173.043	14.614	29.642	7.13	0	0	32.027	1.645	250.438	0.482	30.595	0	7.549	0.285	20.126	7.079	23.065	0	3.765	25.081	0	180.943	8.462	1.083	0	5.657	0.037	1406.95	2513.2	30.252	62.199	-15.8371	7.36334
907	373646	56	5290.49	5425.67	6309.52	256.069	54.554	31.181	2.868	0.147	0	46.518	4.019	3.944	4.443	1183.75	5.674	0	3.864	22.101	12.874	19.489	10.118	0.165	27.952	20.246	7349.5	15.33	6.025	0.834	5.856	18.37	2034.14	3894.28	14.361	64.824	-13.7557	-25.3457
908	374375	32	703.293	636.63	756.37	31.688	6.235	9.601	0	0	1.636	11.395	8.922	15.657	10.556	26.323	1.123	0	0	11.668	0	0	0	4.253	2.801	0	102.072	0	8.082	0	5.739	0.264	761.302	1448.5	39.492	49.361	-9.72593	15.0457
909	376322	28	703.719	637.767	697.888	29.55	13.736	2.157	0.662	0	0	0	5.88	12.273	9.265	20.113	9.179	2.432	0	15.725	4.988	3.78	2.028	9.601	19.973	1.64	79.567	4.726	0	0	17.731	16.488	1065.64	1819.41	2.077	17.835	-3.90835	14.6099
910	376565	40	1654.38	1556.72	1838.27	66.233	42.446	32.652	19.159	0	0	6.074	35.384	42.135	41.908	188.165	6.965	6.869	4.977	38.296	35.723	6.13	11.274	47.24	52.27	7.925	554.434	25.542	10.682	9.037	52.047	70.985	3437.24	6208.57	15.077	94.497	20.7592	1.30324
911	377967	40	2163.78	2230.38	2523.37	104.112	49.715	26.346	4.914	11.152	0	15.184	13.201	6.309	20.446	77.451	17.497	11.177	4.898	47.789	15.947	0	0	7.936	36.711	7.345	482.971	41.241	16.245	4.738	47.598	15.874	2908	5291.76	9.291	101.36	20.8048	21.1484
912	379146	34	1765.32	1829.28	2056.63	112.361	25.905	10.725	0	0	0	26.606	4.104	32.948	28.772	40.634	16.503	0	0	16.795	8.152	3.469	4.348	5.298	6.959	0	171.773	8.034	1.778	0	32.821	0	1253.94	2268.78	78.081	94.671	5.62444	11.2876
913	379489	37	2463.9	2821.9	3015.03	95.499	33.065	9.097	0.241	1.044	0	0	10.896	13.881	10.325	35.821	0.22	0	0	11.259	20.541	5.848	6.443	5.763	29.738	7	279.695	20.934	10.049	4.198	30.832	80.597	2886.22	4977.51	21.088	68.813	9.27261	14.025
914	380120	32	982.848	1008.71	1072.98	36.752	36.691	13.802	1.919	0.31	0	7.117	0	2.082	29.668	97.262	0	1.48	0	0	6.338	6.302	2.319	0.665	1.878	0.998	179.352	0	1.468	0	12.427	0	730.266	1509.02	5.565	44.51	-0.438536	6.7507
915	381210	50	2936.32	2946.89	3667.04	146.397	68.98	20.57	0	0	0.543	41.736	0.328	18.427	5.326	600.511	11.114	0	0	14.261	2.858	0	2.184	5.051	8.368	2.31	136.816	3.889	0	5.605	0	0.04	1355.07	2305.83	11.939	71.576	-1.10787	5.55513
916	381752	64	1475.93	1411.7	1552.89	80.243	23.788	18.027	0	0	0	52.064	10.858	7.37	0.348	123.896	5.074	0	0	17.48	1.285	8.917	7.159	7.9	6.736	9.928	183.377	0	0	0	1.662	8.476	769.807	1575.38	21.671	74.082	2.34285	4.43993
917	381759	30	1597.69	1729.4	2061.04	78.127	27.88	4.154	0.441	0	0	0	0	15.509	15.854	54.541	6.694	5.886	0.366	20.722	0.797	6.118	8.453	16.366	21.494	1.438	198.498	32.923	4.143	0	27.97	4.862	2006.71	3745.14	26.348	40.285	11.7199	12.8276
918	383146	43	2612.81	2653.13	3066.91	127.547	56.773	19.628	0.869	0	0	1.78	10.253	29.813	4.248	47.09	6.344	6.588	1.269	39.35	19.618	8.469	1.711	1.215	35.891	0	439.197	41.557	1.968	6.052	57.972	9.14	2827.63	4952.61	16.984	88.277	19.6314	10.0887
919	383209	75	1669.83	1720.45	1842.64	109.009	33.74	21.888	6.666	2.589	0	0	0.22	8.034	7.692	34.661	9.936	0	0	29.211	14.856	7.917	19.852	5.428	19.838	0	227.191	21.35	9.159	9.186	26.202	43.935	1582.5	3003.88	27.796	60.86	10.0391	12.8395
920	385694	42	2659.34	2525.97	2802.45	118.193	36.11	24.607	13.296	0	0	14.023	11.366	27.059	23.202	118.482	37.25	0	0	39.907	8.775	2.649	3.668	5.338	70.33	16.632	580.693	30.136	6.645	16.555	55.499	99.834	3591.38	6318.78	15.925	69.577	25.9025	11.6945
921	386590	52	1522.08	1534.94	1618.16	68.205	27.967	24.929	9.151	5.199	0	0	15.439	36.663	17.326	68.85	12.026	3.194	0	27.785	18.988	1.187	0.6	2.06	23.86	7.714	298.632	15.176	15.271	9.378	15.692	10.148	2014.89	3745.21	6.102	92.013	13.1737	17.5313
922	386639	33	2676.75	2865.92	2893.65	142.984	14.989	34.19	3.071	0	0	26.254	6.273	15.636	7.541	578.889	0.205	0.662	0	13.38	8.724	6.176	0	0	6.827	0	252.069	2.771	2.474	0	0.79	0.827	1500.11	2668.18	29.424	37.845	2.63098	3.6978
923	389358	30	2592	2568.8	3015.52	75.716	33.696	9.656	0	0	0	9.985	10.093	17.239	16.501	53.184	9.904	4.872	2.472	36.099	43.681	1.709	14.273	4.235	47.275	0.161	385.856	15.723	3.265	0	44.046	7.165	1834.09	3419.14	11.59	55.863	16.4828	15.8763
924	391069	38	1371.48	1373.16	1587.39	67.44	33.912	16.546	7.041	0.407	0	0	7.955	9.172	4.706	35.75	2.226	3.444	0	27.057	19.743	2.297	1.152	4.574	19.448	0	205.298	14.341	4.189	2.559	9.132	20.342	1186.38	2273.78	38.497	70.262	8.25718	23.0468
925	391408	50	2016.3	2142.14	2618.63	98.549	51.015	12.358	11.278	4.194	0	29.204	8.968	6.821	15.801	1196.44	19.954	5.587	0.58	23.058	7.404	340.275	1.822	9.014	27.632	73.7	14978.1	50.946	7.792	5.183	7.096	1.966	1249.79	2344.52	21.816	64.933	-20.2147	-16.0954
926	393038	34	2615.29	2452.45	2756.62	115.057	31.205	23.101	8.997	0	0	0.192	12.788	30.107	10.862	91.604	6.927	8.198	6.998	41.304	16.661	9.354	8.053	19.983	47.365	5.773	577.407	32.753	8.716	4.205	35.537	26.225	4053.22	7151.39	15.211	123.964	20.7226	3.83982
927	393310	40	1283.28	1334.05	1702.69	69.225	28.064	7.21	22.626	0	0	0	5.059	22.329	7.073	40.528	6.112	4.598	0	18.875	28.536	11.775	1.016	0	36.787	0	225.912	19.695	2.39	8.011	9.41	48.026	1818.78	2980.24	28.667	40.464	12.8459	10.1352
928	393384	51	915.067	798.579	921.037	79.984	27.615	5.24	16.682	0	0	0	6.748	7.165	2.501	11.042	6.482	3.799	0	22.486	0	1.038	0	2.229	30.929	0	163.323	11.238	0	1.98	6.579	7.501	918.228	1781.04	17.312	53.091	-0.48756	31.1573
929	393556	47	1297.82	1385.21	1451.55	81.574	23.201	14.862	2.918	0.251	0	27.61	2.276	3.272	0	38.007	7.5	3.019	5.737	8.377	0.971	1.173	7.577	3.211	18.074	0	290.679	8.097	1.49	0.552	8.885	3.402	843.146	1437.88	85.111	52.155	0.705928	25.0841
930	393685	36	1476.13	1453.32	1536.18	67.081	30.52	15.562	0.314	0	0	13.67	4.739	8.152	3.101	13.565	8.91	0.012	3.602	24.715	15.721	0.643	5.338	0	26.299	0.037	241.321	7.17	3.376	1.993	19.876	1.2	1491.5	2922.54	44.65	81.766	-0.635918	31.3492
931	393939	31	2570.9	2553.82	2940.2	120.403	52.796	15.961	7.046	1.402	0	3.043	5.43	13.924	6.385	52.893	5.248	5.674	0	31.449	5.983	1.148	0.629	0.819	26.468	1.833	331.747	33.31	15.473	0	32.582	6.616	2770.78	4963.13	20.834	89.317	16.6034	19.7597
932	394066	30	1784.85	1804.64	2100.08	80.417	36.359	15.876	1.054	0	0	40.14	6.243	1.141	3.22	173.677	3.009	0	0	0.236	1.228	0	1.916	1.571	1.814	0	64.282	5.285	2.084	0	0	3.677	1042.36	1751.76	5.551	0	-0.298115	6.59135
933	394184	57	1148.13	1160.86	1249.49	56.417	17.322	15.894	8.847	0	0	8.024	20.778	25.525	14.649	65.843	17.276	2.021	0	18.771	4.759	4.47	9.03	9.442	49.824	11.347	230.576	0.332	3.113	7.338	11.464	34.815	1193.75	2293.36	30.485	78.52	4.35266	12.8635
934	394770	62	3399.88	3252.84	3446.63	152.447	41.075	13.86	8.725	0	0	6.377	22.297	28.037	38.864	144.359	41.339	22.888	8.439	60.533	30.851	12.896	5.594	22.112	97.681	21.312	693.813	52.33	48.681	22.012	62.842	43.139	3984.64	7317.36	29.119	145.293	24.0733	1.10514
935	395078	34	1059.98	1198.03	1120.34	66.322	16.79	6.366	0.842	0	0	3.925	1.599	22.08	2.582	16.611	0	0	4.728	10.058	10.36	0	0	7.441	16.276	0	57.805	7.188	0	0	14.618	2.4	852.285	1664.83	36.573	41.527	-3.94884	16.6234
936	395162	52	3408.95	3273.17	3783	127.966	68.9	19.599	14.85	0	0	12.371	14.757	26.186	14.911	66.53	12.559	13.203	1.539	33.057	19.768	1.587	4.92	0.734	61.077	3.173	411.15	44.79	9.404	6.192	34.417	231.44	3845.4	6500.35	35.983	98.907	22.6953	16.378
937	395535	33	849.928	783.045	887.951	38.991	15.973	6.062	5.963	0	2.527	7.47	3.713	15.329	11.019	13.351	1.026	8.525	2.069	17.811	8.292	5.18	2.438	3.158	33.58	0	121.998	4.693	7.165	0	24.132	11.373	1126.84	1973.41	19.406	34.942	-3.75005	14.266
938	398786	40	355.771	391.466	419.21	31.801	7.22	0.686	0	0	1.359	0	2.894	3.419	3.437	18.16	1.657	0	3.394	6.723	13.04	0	0	0.994	10.76	2.534	110.159	8.763	12.26	3.22	10.66	5.67	491.056	850.815	0	24.337	-2.87008	27.0383
939	399671	32	1542.69	1645.27	1736.51	52.308	20.055	4.669	7.502	0	0	0	12.738	12.282	10.845	10.636	4.038	1.079	0.018	3.35	10.686	2.452	3.32	13.194	6.998	0	175.981	17.846	0	14.423	31.736	4.535	1131.25	2046.93	23.046	54.077	-5.329	19.2738
940	400538	62	3772.44	4042.33	4388.8	148.485	55.016	18.11	15.037	0	0	1.163	37.373	125.038	57.696	321.424	75.155	53.475	5.822	114.642	40.094	27.13	24.299	51.277	190.998	6.06	925.677	74.244	45.659	24.023	55.142	42.324	6275.54	11376.2	15.33	250.261	27.1087	-7.82827
941	400557	35	1544.42	1506.68	1703.34	60.002	34.883	15.139	9.689	0	0	0	7.067	21	39.147	47.154	111.741	7	0	43.467	23.414	5.761	3.249	7.747	14.998	2.556	237.346	15.233	3.575	0.189	10.213	3.797	2019.93	3243	22.158	60.558	12.9919	12.7848
942	402996	53	597.078	648.349	723.945	34.588	32.423	3.84	5.421	0	0	9.601	3.135	2.479	0.142	24.904	2.33	9.039	0	12.3	3.798	0.194	0	0	8.628	4.257	80.447	17.49	4.938	0.868	20.97	5.784	773.868	1532.91	27.843	13.355	-0.665255	28.4277
943	404382	28	495.103	572.051	564.796	16.06	8.854	2.515	8.47	0	0	0	9.747	11.651	20.453	19.61	8.85	6.571	0	8.721	10.752	3.989	0	0	12.605	0	98.419	2.4	8.298	5.753	4.148	14.954	642.869	1354.98	10.119	33.671	-5.86688	13.6878
944	404750	35	1631.78	1591.94	1768.37	59.564	23.855	10.159	15.222	0.87	0	2.581	7.676	24.919	12.492	94.783	2.539	19.079	0	10.901	4.375	24.256	6.355	13.031	34.026	0	216.025	21.378	16.19	20.387	14.496	89.579	1891.12	3477.11	7.835	62.735	12.6294	4.37196
945	404908	37	1790.24	1755.25	2020.06	110.274	28.486	7.529	30.276	0	1.94	13.126	13.589	50.469	8.157	77.399	16.695	5.89	0	34.665	13.13	0	0.756	0	64.961	19.282	456.875	24.899	2.058	4.628	65.476	124.114	3093.77	5363.29	19.169	63.934	24.0719	14.2517
946	405124	48	1648.24	1610.36	1985.11	95.975	21.34	5.44	7.455	4.888	0	3.986	2.057	13.395	12.389	50.296	4.39	0	3.451	36.914	0	0	0	0	23.023	3.828	270.702	5.001	0	0	6.599	6.968	1107.54	2195.15	14.184	53.442	9.59271	18.7758
947	407780	30	1912.25	2062.79	2436.41	127.079	29.078	17.058	7.04	0	0	3.542	0	16.359	2.426	40.943	0	5.143	0	28.703	16.095	0	1.026	9.551	41.364	0	320.288	18.222	5.031	6.892	43.362	12.368	3372.69	5971.37	14.82	28.894	14.5773	21.9911
948	409064	69	804.359	1036.43	1040.18	32.769	21.039	20.891	18.641	2.38	0	0	16.862	18.967	24.223	52.287	14.025	19.503	2.046	9.791	23.688	3.817	0.14	3.387	20.144	2.701	173.573	13.672	15.659	8.269	45.181	88.557	1212.24	2165.64	4.955	75.033	6.50011	14.9721
949	410243	50	911.36	924.706	912.542	51.56	20.004	28.058	0.585	0	0	0	7.14	17.686	7.816	34.972	4.18	1.466	1.505	23.047	9.454	1.373	0	7.23	23.148	0	174.119	17.564	8.628	4.326	30.994	3.685	981.316	2109.98	26.364	30.694	11.0998	19.5082
950	410762	25	500.502	475.779	560.079	35.126	10.028	0	1.484	5.921	0	0	3.769	2.54	3.157	31.442	1.112	0	0	15.514	0	0	0	1.546	7.155	0	78.505	0.512	0	0	0	0	336.745	663.779	4.419	34.331	-8.70757	22.2183
951	411391	58	1122.01	1048.78	1159.95	48.042	21.237	18.138	0	3.253	0	11.985	2.163	11.824	0.332	45.293	3.42	11.126	0	23.254	0	2.349	0	3.129	32.349	1.562	197.637	33.847	5.6	8.795	0	2.755	1056.25	2052.69	21.009	82.764	13.1273	22.6299
952	413671	32	541.006	505.35	585.124	18.148	13.046	0	1.671	0	0	11.71	7.813	0	11.711	24.115	3.625	2.519	0	6.492	0	0	2.489	0.599	13.947	0	93.916	7.933	7.996	0	0	11.742	569.909	1024.35	3.701	27.616	-1.8914	26.8586
953	413905	37	1556.84	1514.21	1675.68	87.547	15.958	12.984	12.391	0	1.184	10.019	5.607	19.658	4.569	39.83	10.95	6.897	3.333	35.95	13.365	2.491	0	5.091	14.785	6.717	235.717	33.486	0.359	11.009	14.798	17.53	2087.48	3765.65	10.276	63.914	15.3153	19.4473
954	414132	29	719.771	778.901	753.396	51.007	10.481	3.771	1.194	1.117	0	3.236	0	17.482	1.427	2.17	4.133	0.582	0	12.545	2.249	2.074	0	0	12.169	6.736	81.474	5.708	0	4.783	4.16	0	739.499	1501.81	3.623	36.888	-7.19168	17.6788
955	414928	38	1327.03	1333.33	1532.8	67.014	16.455	4.139	7.328	0	0	7.545	5.463	8.655	6.001	19.273	7.195	3.668	0	10.373	10.225	0	0.328	4.486	33.596	4.148	144.287	11.804	1.745	0	1.747	12.648	932.271	1663.89	42.002	55.659	0.202738	17.9079
956	416169	31	1857.38	1827.22	2024.63	64.965	31.953	7.509	0.709	0.174	0	0	7.273	4.781	8.778	5.021	12.598	1.865	0	12.475	9.294	4.755	1.03	2.741	16.093	0	160.245	5.229	0	1.696	2.973	16.924	1574.43	2680.58	14.991	43.106	-5.63196	30.738
957	416864	42	3014.22	3072.55	3451.45	107.563	50.83	9.617	4.881	0	0	0	10.685	24.16	21.66	42.201	4.442	10.984	5.077	59.786	19.174	16.687	4.401	7.023	84.644	1.332	361.575	33.444	0	2.858	29.471	8.483	2476.16	4728.61	76.542	68.289	17.8271	1.78385
958	417181	39	958.582	1038.93	1296.97	36.158	30.945	8.948	13.973	2	0	13.392	6.192	14.027	17.509	48.572	4.863	3.481	0	19.087	39.011	4.222	0	4.297	25.658	6.829	218.856	33.457	1.127	0.221	8.035	55.421	1536.96	2929.48	0	66.333	13.1809	14.9091
959	419291	38	1305.59	1241.94	1479.61	58.635	24.395	12.229	7.623	0	6.287	24.212	12.8	22.666	25.588	72.506	16.187	6.631	4.108	21.248	36.501	2.091	7.191	11.693	29.343	3.18	212.463	8.274	13.57	17.073	24.928	12.629	1055	1820.07	22.68	92.298	10.5012	17.3885
960	419782	36	804.676	811.972	979.388	49.343	23.771	6.131	23.899	0	0	15.924	10.912	32.372	13.391	84.332	9.644	1.615	0	24.324	22.401	6.837	3.575	13.089	24.279	2.153	218.89	17.15	19.144	4.174	25.295	31.9	1240.35	2224.59	3.422	56.266	15.079	10.2807
961	421403	26	683.352	559.866	660.677	45.58	9.936	9.731	4.439	0	0	0	9.406	4.362	9.237	17.829	0.435	0.258	0.662	15.084	0	0	0	0	11.761	0	83.544	0.677	0	0	0	0	642.262	1197.48	11.413	28.746	-6.9879	25.3586
962	421557	31	300.575	316.914	358.564	12.381	3.269	2.461	7.525	1.208	0.58	7.901	9.827	4.326	5.903	14.656	2.697	0.361	0	4.172	0.998	0.798	3.554	4.446	24.16	2.639	141.514	3.307	2.251	0	10.081	8.093	510.191	806.361	4.429	45.937	-4.72177	27.944
963	424175	40	4449.96	4216.35	4866.68	135.762	26.432	22.853	0.188	1.57	0	34.668	14.403	53.28	22.28	141.662	18.627	13.499	2.324	14.503	13.9	21.111	6.063	16.68	50.554	3.95	462.812	2.805	7.727	4.035	16.252	28.851	2265.61	4372.45	13.966	106.195	6.95489	7.39073
964	425361	31	567.568	571.987	659.215	14.801	8.38	2.956	1.183	0	0	12.643	1.945	6.301	0	16.405	1.963	8.63	0	5.812	2.965	0	1.802	8.388	5.864	0	80.792	7.964	0	0	18.145	15.515	591.33	1037.51	12.571	14.062	-7.68321	19.2527
965	426311	40	1233.74	1226.26	1468.22	58.641	26.486	12.773	0	0	0	3.836	18.031	1.617	12.602	43.483	10.508	2.069	0	15.9	8.673	5.51	0	0	20.08	0.495	181.67	11.652	12.882	4.647	4.762	2.195	1372.84	2289.18	7.849	69.426	0.963259	25.876
966	427291	30	2876.21	2890.53	3318.91	109.867	27.391	11.639	5.513	0	0	7.599	0	1.14	0.258	137.324	0.888	3.161	0	9.768	4.458	104.511	10.082	18.354	9.761	0	397.196	4.648	0	6.759	5.382	0	968.39	1730.35	0	31.593	-2.15491	-0.323378
967	427737	31	1780.14	1687.89	1971.6	103.065	37.557	13.844	2.104	0	0	5.357	9.008	32.786	22.635	45.363	8.729	11.963	0	10.961	10.385	5.995	0	4.43	41.155	1.826	297.758	25.315	17.199	6.377	40.411	28.966	1396.32	2327.69	28.586	46.699	15.7925	12.6589
968	428211	36	1172.19	1056.58	1106.45	66.87	11.008	25.275	1.938	0	0	17.78	8.802	15.454	10.298	27.319	2.544	1.218	1.114	8.097	10.759	0	1.824	0	18.584	0	181.753	13.492	2.967	0	12.729	7.584	1195.7	2173.57	5.498	52.987	-0.0292272	18.6551
969	430171	32	531.157	555.777	685.004	34.734	2.219	1.574	1.936	0.926	0	0.185	12.77	6.774	27.083	26.621	2.186	0.189	0.908	6.179	5.099	0.394	2.952	6.078	13.691	0	100.987	9.231	0	0.744	6.563	1.95	540.308	817.237	4.818	35.382	-4.08145	18.9485
970	430665	71	1774.33	1921.07	1981.66	88.755	34.804	17.874	7.763	0	0	2.196	4.041	16.515	11.509	54.038	13.452	4.547	10.511	28.566	9.224	10.734	4.717	2.74	52.131	7.435	223.523	31.194	2.466	13.811	29.651	9.814	2164.27	3922.74	52.395	110.463	18.2461	9.34935
971	433710	37	2836.44	2874.65	3202.94	183.237	57.772	31.282	19.879	3.478	0	0	14.424	21.41	4.62	98.581	2.448	7.739	0	34.159	17.559	6.216	8.672	29.15	58.28	4.116	736.4	23.749	8.182	5.08	149.815	62.146	5321.63	9787.46	26.083	9.313	20.1763	4.87845
972	433739	35	1328.45	1253.68	1562.1	74.11	27.487	14.997	7.852	0	0	6.551	12.033	12.117	3.902	32.987	12.346	9.909	0.017	13.16	16.214	1.371	0	0	39.096	0	314.837	26.021	2.884	1.186	6.605	13.907	1565.73	2710.56	33.486	31.378	12.0139	22.1441
973	434050	35	2340.91	2507.92	2566.18	81.869	20.476	17.813	13.776	0	0	8.073	29.463	21.177	13.396	64.164	16.926	25.955	0	34.147	21.005	55.105	0	2.509	22.107	0	294.821	8.771	11.784	4.506	20.301	15.617	2273.7	4400.44	45.197	61.066	11.4252	2.5972
974	436081	38	1548.36	1591.61	1843.37	62.71	48.192	11.485	5.922	5.372	0	0	14.214	20.371	22.679	40.386	17.787	4.444	7.069	26.714	7.247	1.074	4.942	12.029	39.826	1.217	283.072	14.812	7.7	5.966	4.252	5.878	1410.16	2725.57	18.33	65.26	13.0875	19.2944
975	438062	34	838.376	838.647	919.378	47.394	18.722	3.59	0.709	1.523	0	4.286	4.095	2.4	1.395	24.933	7.668	1.698	0	17.686	20.321	2.052	10.09	0	13.555	0	111.655	19.709	2.417	0.085	42.329	18.638	862.714	1286.7	3.36	19.399	0.445431	28.8817
976	438273	37	2324.25	2225.99	2633.29	108.057	30.544	8.462	11.161	0	0	0	10.926	27.398	16.091	78.217	8.271	3.11	1.75	65.095	21.66	1.193	1.624	3.441	95.516	0	496.095	22.391	7.717	15.493	9.919	13.558	3683.69	6641.38	3.031	180.19	25.5251	14.6995
977	439350	34	1073.53	1037.55	1294.97	63.062	7.248	14.655	0.584	0.424	0	0	2.692	4.601	3.753	12.613	1.837	3.614	1.475	14.161	0	0	2.492	0	25.629	0	144.169	8.361	0	0	2.036	0	791.52	1321.46	44.692	17.728	-2.47769	29.5703
978	441998	34	2492.46	2704.36	3086.4	130.19	32.109	12.009	3.072	0	0	8.691	7.759	18.938	14.55	39.757	13.861	7.462	0	9.797	18.854	16.477	0	9.248	32.675	1.658	445.257	14.223	1.04	6.188	21.356	46.448	2481	4356.43	23.613	44.734	8.47566	10.7222
979	443427	47	1297.83	1605.6	1532.4	63.052	16.385	8.597	1.943	5.146	0	0	16.864	10.12	9.212	26.766	4.894	2.83	3.425	11.918	11.133	8.325	0	1.812	12.722	2.429	193.662	16.928	0	0	13.187	3.636	1213.31	2273.31	40.221	54.366	4.00555	14.1049
980	447028	46	1883.3	1825.56	2113.45	87.879	16.508	20.956	2.639	0	0.323	0	26.505	17.625	14.431	41.325	9.535	10.694	0	14.183	8.557	12.5	9.059	13.513	30.095	4.679	233.661	9.495	2.318	10.705	19.421	670.643	1873.2	3592.98	34.461	60.423	6.82731	11.7317
981	447105	45	597.034	619.076	725.102	33.076	12.662	1.917	0.523	0	1.546	7.943	0	38.904	3.07	19.609	7.265	0.68	0	35.06	0	0	0.574	4.815	3.371	0	49.23	6.045	0.59	0	16.248	11.609	832.062	1385.76	7.69	70.505	-13.7189	15.562
982	447374	30	1236.35	1060.49	1314.88	29.488	23.895	5.021	0	0	0	0	12.215	9.413	9.525	8.032	9.553	2.095	2.527	14.183	0.391	0	1.25	0	15.517	2.102	142.878	12.308	2.436	8.18	10.726	2.361	1492.78	2821.47	17.107	6.806	-1.92134	17.9494
983	448758	34	2147.18	2129.37	2427.32	112.639	28.355	23.336	4.835	0	0	5.306	9.809	28.025	3.529	59.361	21.558	5.016	0	17.253	5.376	0.045	0.524	12.466	22.82	3.119	325.437	14.965	0.79	2.973	14.203	4.83	1697.35	3231.58	19.159	55.526	11.8379	18.1208
984	449095	52	389.157	441.514	499.569	24.147	7.708	2.185	2.469	0	3.352	0	0	3.354	3.999	21.67	5.713	0.536	0	6.499	4.238	0	0	0	17.471	0	104.855	7.89	0	0	6.171	0.228	654.702	1267.04	7.279	32.867	-3.15793	26.51
985	451341	36	909.94	788.521	1045.89	66.041	11.951	2.732	6.548	0	0	55.303	11.992	14.816	13.18	17.348	0.141	0	0.485	14.255	14.802	7.873	9.822	1.083	12.522	0	86.702	0	0.741	2.512	17.381	7.258	1047.98	1978.23	6.147	73.464	-6.30928	12.9438
986	451736	38	1451.76	1480.66	1662.78	61.769	23.339	16.917	7.138	0	0	4.899	3.606	38.612	5.449	39.929	3.588	0.459	0	20.081	12.664	3.495	6.493	9.69	62.826	0.244	229.316	16.982	5.517	2.598	15.107	0	1346.7	2541.32	69.657	41.799	16.1189	15.1175
987	452014	51	3879.21	3860.43	4522.27	164.195	66.878	24.507	4.821	0	0	8.589	17.811	17.059	4.31	493.74	3.076	0.43	0	31.807	14.78	824.456	0	12.317	30.238	6.128	1659.75	14.536	0.426	0.311	19.174	5.572	1521.03	2929.35	12.921	83.302	-16.9672	-4.20753
988	452245	30	931.666	1093.77	1101.59	52.477	16.778	14.645	0.875	0	0.538	0	7.436	12.552	14.648	39.792	3.316	1.76	0	25.481	12.11	0.493	0	8.213	34.08	0	255.298	16.533	12.228	0	18.43	3.013	1291.91	1992.08	8.133	19.925	13.3531	22.4623
989	452283	44	1152.75	1213.03	1304.75	72.276	19.112	3.143	0.599	0	0	0	14.744	4.334	1.99	33.441	14.793	3.996	0	18.821	2.819	0.154	6.969	1.345	34.76	4.332	68.788	9.04	0.867	4.777	1.726	10.814	1042.52	1833.64	15.919	56.792	3.04443	27.2475
990	458334	30	939.607	1081.66	1163.51	56.972	24.781	11.718	17.184	0	0	0	10.818	25.342	15.965	62.332	10.263	0	0	14.088	8.658	8.289	0	5.96	52.508	2.644	163.259	10.594	0	0	22.486	16.218	1836.92	3242.14	7.541	49.595	7.54824	12.0314
991	458903	32	595.831	595.264	622.13	21.668	21.354	4.262	1.67	1.589	1.332	4.176	5.732	12.299	3.595	5.113	0	0	6.514	0.081	5.669	0	0	0	12.376	0	80.638	3.696	2.061	0	6.081	0	654.99	1243.38	29.574	23.883	-7.54562	18.3422
992	462565	62	1058.77	980.688	1081.24	61.877	17.592	11.042	4.527	0	0	53.625	12.506	23.534	20.98	26.791	17.01	0	3.268	0	0	17.938	6.132	0	34.28	2.764	89.456	3.767	0	0	8.161	9.68	863.218	1571.26	4.691	116.637	-4.51634	11.4812
993	464391	75	1616.67	1742.93	1722.71	107.008	31.685	23.099	5.387	3.116	0	5.691	9.169	23.167	13.72	64.584	7.477	15.187	10.441	18.997	11.906	13.186	1.532	10.361	30.449	4.723	182.569	33.458	5.917	0	13.144	4.627	1348.79	2276.32	47.553	82.913	14.8917	9.50355
994	466277	43	1289.07	1161.79	1425.38	52.654	6.017	15.82	4.596	0	0	0	7.766	4.122	4.714	12.876	8.112	0	0	12.948	7.779	0	1.172	8.93	43.366	2.777	148.489	13.256	0	0	3.535	0	1030.47	1692.03	9.173	50.237	-0.486448	30.5408
995	468196	38	2255.72	2142.6	2529.48	85.518	43.422	12.366	7.982	0	0	3.225	7.444	18.647	8.008	73.953	12.78	9.281	1.299	36.113	24.755	9.168	4.406	4.366	99.594	7.648	543.178	36.418	1.985	9.013	24.14	5.621	3095.07	5442.85	10.303	95.831	21.7114	8.61365
996	469348	57	1154.56	1122.07	1346.68	51.532	21.489	8.319	2.901	0	0	2.58	18.213	12.923	14.455	26.468	6.891	0	0	12.995	0.363	8.287	3.58	5.081	12.917	0	205.349	19.14	4.301	2.141	20.459	6	1207.13	1917.27	78.862	63.513	4.31523	14.0121
997	470309	38	985.728	1032.15	1129.06	58.222	19.634	6.532	0.878	0	0	0	4.785	9.095	6.148	24.36	2.569	2.221	3.932	28.464	8.054	8.31	0.838	0	35.607	1.496	161.255	20.291	0.718	0	6.396	8.449	1142.12	1788.69	13.334	36.239	10.7199	13.6317
998	470537	42	863.479	809.099	935.524	57.495	13.154	3.043	0.276	0	0	0	3.377	7.065	12.331	13.561	3.839	0	0	15.418	19.138	0	2.463	0	2.043	0.64	197.886	11.356	7.308	5.08	27.544	0.089	609.486	1097.26	20.828	11.424	-3.52748	20.3275
999	471865	31	900.024	832.758	1012.93	52.081	5.388	9.317	9.822	1.119	0	0	0	4.55	10.033	27.487	7.191	3.169	1.723	31.119	9.361	0	0	0	26.097	1.882	137.671	8.321	0	0	4.553	8.312	1199.81	2053.09	16.674	44.624	3.15624	26.7764
1000	474499	26	585.858	570.814	764.241	35.014	7.064	2.696	3.2	0	0	0	18.538	7.292	7.645	28.957	0	4.881	2.209	4.569	2.155	0.757	0	0	4.988	0	68.075	0.248	4.548	0	27.935	1.56	494.5	881.014	13.691	29.153	-9.78965	17.6732
1001	474526	35	622.273	596.403	631.739	41.524	14.494	4.897	4.329	0	0	4.967	4.962	1.504	1.344	27.06	10.723	5.827	0.889	7.315	9.494	3.544	0	2.234	29.899	5.751	83.541	13.701	2.484	0	7.536	5.841	970.216	1774.8	11.058	25.792	0.0445275	26.2688
1002	474968	34	809.834	805.905	908.295	76.143	40.209	26.431	6.444	4.834	0	0	5.825	22.23	12.526	36.552	12.93	8.694	0.806	14.161	3.533	14.411	4.901	29.346	8.279	1.457	230.849	10.866	10.17	1.775	98.582	13.552	1640.53	2835.75	45.964	20.475	5.54369	10.5694
1003	476197	35	2043.75	2099.77	2459.53	128.53	26.084	10.323	2.942	0	0	0	29.798	10.356	10.757	45.66	4.228	5.856	3.448	24.275	13.272	1.564	9.96	9.84	44.874	2.641	306.214	27.121	5.239	4.17	22.828	15.212	1946.15	3693.22	22.701	72.182	14.2888	23.5016
1004	476983	47	907.194	913.933	982.832	59.391	29.697	10.85	15.729	0	0	0	11.28	20.663	19.552	49.592	3.883	1.585	4.015	32.878	1.712	8.622	8.091	10.371	44.264	5.479	162.024	30.564	13.02	9.7	20.879	28.278	1267.31	2367.61	12.347	41.81	18.1084	9.58186
1005	476994	36	1684.55	1668.15	1888.23	91.8	18.882	10.558	7.002	1.072	0	2.817	8.96	13.486	27.588	44.668	27.331	2.189	1.032	5.696	0.428	0	7.05	0	38.592	0	246.359	23.52	0	0	0.742	1.885	1644.7	2934.71	27.367	55.684	4.3204	21.6296
1006	478167	43	1258.92	1242.85	1402.28	94.675	32.419	10.557	2.118	0	0	0	0.848	16.052	3.266	34.793	7.278	0	4.996	21.227	11.044	0	1.647	4.611	42.305	0	134.656	9.166	6.033	4.223	43.004	0	1356.27	2375.2	6.816	92.899	7.86643	19.4653
1007	479154	68	1579.88	1494.41	1666.96	93.57	43.351	20.06	2.55	0.476	0	28.504	22.598	9.584	12.726	53.088	12.86	9.426	5.619	17.422	9.597	5.352	7.554	28.854	35.409	10.393	252.831	25.109	1.545	0.569	35.332	15.948	1525.4	2873.72	51.033	43.126	11.613	13.7006
1008	480607	72	7676.18	7641.81	9096.26	329.815	104.782	53.615	1.304	0	0	37.267	0	682.229	1.816	23.723	0.731	2.172	1.101	26.273	0	4.845	0.82	0	17.965	1.537	143.519	12.259	2.906	0	0	0.032	4658.64	8094.44	21.278	25.585	-13.1983	10.0694
1009	485684	36	1872.7	1721.1	1981.4	69.498	24.614	11.685	6.864	0	0	0	6.515	13.155	11.622	53.255	11.295	3.026	2.123	33.646	21.241	0	9.598	0	32.029	2.188	232.636	26.513	0	0	36.353	2.526	1846.19	2907.97	13.126	89.016	16.3683	20.3652
1010	486775	55	1109.51	1162.11	1267.25	62.929	16.026	17.981	4.629	0	0	15.624	11.539	27.583	25.493	59.857	41.073	7.155	0.709	47.065	16.183	2.865	0	13.751	26.302	7.243	199.897	37.158	9.384	10.787	28.382	41.837	1252.75	2277.24	17.233	38.163	18.6292	13.3582
1011	487215	30	2091.02	2114.44	2553.08	126.001	33.407	19.71	12.911	0	0	4.637	26.841	37.767	22.367	50.136	0.116	2.625	2.929	51.288	13.958	0	3.138	8.152	23.621	0	381.787	8.401	14.64	9.074	7.364	0	2360.38	4212	17.354	83.076	18.3141	16.3783
1012	488212	46	1451.03	1398.78	1708.02	72.642	28.986	7.828	7.353	0	0	0	12.751	37.518	3.297	11.07	4.881	4.616	0	9.928	12.067	11.871	0	0	48.414	0	164.231	26.022	13.12	6.061	10.229	4.162	1437.44	2606.67	48.934	42.889	8.70239	10.2682
1013	488805	32	1071.77	1108.69	1300.47	67.262	13.837	16.575	3.458	0	0	0	9.492	10.482	4.998	28.912	8.3	16.779	2.148	11.8	14.711	2.578	0	7.116	34.979	1.424	306.919	20.554	0	9.071	17.52	37.77	1396.58	2706.4	33.21	51.228	10.9656	15.2167
1014	492062	39	3376.1	3726.72	4366.62	150.207	41.357	12.033	14.59	0	0	13.071	32.04	78.299	47.423	290.236	46.278	15.195	0	59.269	22.405	30.197	13.307	13.713	127.999	10.16	665.106	34.334	21.481	19.595	32.404	97.195	4297.51	7535.67	31.437	138.879	24.5877	-5.74712
1015	492908	39	912.084	1035.02	1062.54	31.499	17.67	6.32	1.574	3.905	0	0.11	0	0.351	5.063	12.766	1.44	3.248	0.972	14.977	8.515	0	2.713	7.966	27.2	2.437	104.287	3.622	5.514	2.207	6.438	3.876	1061.33	2206.19	4.402	30.517	-3.938	28.2738
1016	493335	34	1543.61	1628.25	1771.36	56.22	12.187	19.244	0	0	0.573	0	5.304	13.512	12.036	13.11	5.698	0	0.78	11.934	8.383	0	1.633	4.976	30.374	2.497	144.989	9.6	2.767	5.27	16.349	0	1457.26	2346.32	55.346	51.821	-1.90128	16.7403
1017	494517	34	74.856	47.373	50.749	0.171	8.022	5.99	11.499	0	0	0	12.171	12.497	14.376	60.435	15.587	0	0	3.812	8.411	12.04	7.241	13.33	6.396	2.317	42.562	0	11.286	8.504	26.787	1.243	877.679	1683.08	9.116	22.008	-6.30023	10.9229
1018	496091	33	1785.59	1711.64	1973.56	67.783	21.059	4.109	4.112	1.988	0	3.964	11.319	20.805	5.752	32.534	10.919	14.998	0	14.1	19.092	0.134	2.982	2.082	45.347	12.766	190.953	20.282	1.415	0.521	16.798	11.352	2269.04	3779.09	1.395	82.702	11.4302	20.6075
1019	496219	40	2824.99	2717.47	2948.61	99.565	15.322	14.986	2.017	0	0	4.448	27.46	52.629	31.908	159.892	36.318	11.569	5.49	50.217	18.156	17.271	17.685	28.583	57.623	8.07	253.265	13.768	13.225	16.547	36.862	67.731	2083.16	3848.81	17.212	144.557	18.9935	-1.58109
1020	497196	38	1587.49	1665.08	1711.66	50.523	21.327	20.863	4.745	0	0.952	5.406	10.447	22.51	7.957	28.413	0.914	2.811	0	20.82	40.35	0.036	2.8	0	32.623	2.086	230.532	21.257	2.09	0	4.316	17.181	1356.91	2417.52	16.529	63.025	13.3852	20.0827
1021	497371	63	886.473	790.843	1008.85	65.014	15.641	8.599	2.667	0	2.837	0	0.559	14.426	8.819	33.481	8.945	9.403	1.426	11.7	22.543	3.98	1.964	0.797	14.145	2.111	189.053	10.942	1.132	0	39.039	9.161	911.225	1688.92	39.855	43.757	4.87733	16.2095
1022	500375	44	406.454	554.521	587.117	30.827	18.122	8.356	3.864	0	0	0	0.071	22.235	7.268	8.54	3.807	3.892	0	19.216	15.967	0	5.553	7.286	9.875	1.564	200.662	8.328	0	0	25.929	4.478	927.735	1660.69	31.121	56.064	-3.16426	16.8419
1023	500571	46	1514.58	1623.6	1985.68	70.849	8.102	21.992	0.664	0	6.541	4.037	5.719	8.851	3.301	20.624	5.934	2.673	3.412	21.067	5.693	6.91	4.685	5.387	25.114	1.297	202.667	17.014	2.442	2.435	19.985	3.404	1647.81	2990.44	22.389	94.647	4.00778	15.1201
1024	505252	46	2404.51	2657.68	2975.89	151.927	48.356	26.054	6.131	8.979	1.806	0	13.686	26.314	21.261	52.94	5.892	9.639	0.686	19.008	59.014	5.076	3.149	13.218	35.26	0	461.247	38.531	7.379	3.226	21.791	21.093	2762.6	5101.88	30.925	152.578	16.1494	13.5669
1025	506043	39	437.167	400.482	501.094	22.445	6.059	5.707	1.195	0	0	0.948	0	3.938	5.639	10.879	9.471	0	0	4.299	14.524	0	5.743	3.397	10.614	0	72.894	7.79	2.561	8.01	11.461	3.824	374.225	841.447	4.528	19.708	-6.57457	27.774
1026	506465	40	1993.05	2007.43	2240.68	141.257	40.441	9.835	0	0	1.638	1.581	9.083	22.246	86.101	31.393	13.956	2.358	0	27.599	12.427	4.532	9.22	7.357	21.732	0	123.799	19.285	0	5.286	33.899	68.156	1336.77	2314.63	3.649	38.935	7.36649	15.6982
1027	507211	79	980.55	1102.04	1189.82	45.016	21.36	2.304	5.973	0.135	0	0	11.287	15.478	0.146	38.826	2.787	3.134	4.625	24.786	3.123	0	0.243	0	49.827	4.933	234.433	10.441	6.54	0	19.029	9.419	837.617	1514.11	15.887	19.446	12.5358	20.3455
1028	511479	34	734.691	722.585	860.692	57.174	7.51	2.686	0	3.443	3.724	0	3.022	1.39	15.423	14.372	2.115	3.223	2.296	18.305	28.893	2.16	0	4.645	11.732	6.015	184.902	25.265	6.419	0	20.826	11.82	725.782	1365.68	1.105	15.307	0.449868	29.0641
1029	514207	35	1628.92	1678.03	2025.8	92.126	23.343	10.392	0.538	0	0	0	11.307	5.957	13.451	53.132	5.424	10.514	0.046	22.628	15.228	0	1.607	1.802	39.932	0	197.47	37.65	1.689	4.825	14.725	0	1061.97	1924.69	8.385	67.684	11.4138	25.1074
1030	515186	39	1281.79	1399.01	1412.16	68.409	37.589	11.122	13.448	0	0	8.322	18.067	20.651	7.616	38.737	11.964	0	0	29.627	14.006	2.499	0	14.773	32.526	3.32	257.645	17.994	0	0.05	14.946	3.681	1565.18	2844.43	36.511	66.678	13.7464	16.7445
1031	516611	26	398.396	414.164	439.551	25.982	6.241	15.871	2.956	0	0	0	0	3.646	1.221	4.855	1.327	0.927	0	9.208	2.253	0	0	0	13.685	0	32.872	2.038	0	0	3.519	0	460.323	821.426	4.102	33.014	-10.348	27.3633
1032	516882	48	2566.35	2627.5	2927.8	93.022	35.413	15.364	0.598	0	0	0	9.497	37.823	6.784	51.565	4.15	14.581	0.89	25.1	31.476	4.749	0.053	9.06	86.429	0	369.881	15.058	9.398	9.931	22.333	2.187	3069.09	5643	36.618	43.944	17.2251	12.6938
1033	516999	40	1209.06	1190.13	1301.58	75.161	14.64	8.593	6.69	2.319	0	2.028	1.37	9.955	3.588	22.151	7.488	5.751	2.654	8.236	9.374	36.92	2.255	11.933	8.715	0	165.626	8.649	0.59	2.521	20.057	61.368	1413.89	2477.26	18.301	39.832	-4.40124	9.42729
1034	518413	30	1841.75	1977.44	2161.57	109.405	30.628	14.492	11.821	0	0	0	5.47	10.017	4.941	50.304	2.803	6.707	3.06	27.827	12.775	15.439	4.836	11.843	30.123	9.746	372.454	29.735	5.567	0.162	34.99	23.514	3366.82	5882.52	30.027	65.079	12.0051	7.47382
1035	521115	61	1217.87	1218.63	1468.61	87.279	30.347	13.462	8.426	4.028	0	0	3.135	14.308	7.846	12.074	1.416	4.112	1.616	8.994	6.937	6.343	8.958	4.898	28.724	1.037	166.97	30.387	0.436	0	28.5	10.996	1101.58	1974.52	8.566	12.259	4.66238	15.1881
1036	521216	27	942.592	924.24	1214.79	73.464	20.776	3.748	0	0	0	0	2.317	5.587	2.641	17.598	4.051	6.773	1.745	2.833	9.811	28.634	6.699	0	34.838	0	130.008	3.839	1.838	7.697	7.607	0.869	836.366	1404.06	29.101	8.105	-4.24065	8.79907
1037	521893	41	728.321	861.765	952.093	43.85	10.365	0.339	4.546	1.962	0	0	4.545	0	27.92	12.165	0.653	0	4.297	12.425	2.425	2.169	1.788	1.35	3.404	0	61.551	0	0	0	0	0	611.15	1108.71	16.481	26.507	-11.1318	22.3264
1038	523103	32	3204.39	3288.15	3959.85	162.962	33.937	35.43	1.175	0	0	40.333	6.364	6.019	44.742	20.735	0	5.504	1.505	10.194	1.486	0.985	98.213	0.833	38.277	0	199.787	7.385	2.042	3.128	0.473	67.922	1896.42	3062.1	0.969	64.798	0.80382	23.2583
1039	525819	54	675.265	675.998	747.831	29.185	12.626	13.353	6.768	2.773	0.957	81.317	14.322	2.648	0	64.366	6.73	1.83	0	0	7.449	0.104	1.492	13.389	25.39	0.902	126.712	0.592	5.743	0	25.922	5.532	714.662	1421.21	16.717	142.746	-7.90731	24.3856
1040	526137	48	1307.21	1255.01	1422.93	76.704	43.723	8.554	15.396	0.91	0	12.927	12.106	24.652	20.75	105.065	25.909	6.153	3.896	32.22	4.575	45.273	20.108	1.477	19.523	2.534	286.469	24.623	11.639	7.978	32.534	24.396	1847.67	3309.34	10.104	83.46	12.7273	2.80276
1041	526171	21	186.69	237.132	203.867	8.476	10.984	5.892	3.393	0	0	0	4.316	4.531	0	37.652	8.572	0	6.225	1.225	0	1.937	1.174	8.382	3.414	0	61.554	10.108	0	0	20.244	8.638	340.093	685.734	0.673	12.428	-9.86699	20.9176
1042	527183	90	1194.51	1158.87	1485.01	93.412	40.487	5.382	17.623	0	0.888	5.046	25.699	42.251	35.557	178.677	56.961	8.646	4.935	37.022	34.972	29.308	8.414	17.731	38.016	9.228	209.027	33.851	20.482	17.871	61.021	25.311	1761.9	2815.82	50.412	90.388	17.402	-2.0572
1043	527211	54	556.688	466.312	573.541	33.737	10.052	0	0	0	0	9.511	7.306	4.706	60.055	33.414	9.714	0.137	0	24.332	2.626	0	12.213	5.201	15.319	0	118.02	11.133	0	0	10.295	3.701	419.113	880.953	16.793	43.962	3.06172	26.8229
1044	527626	34	1315.95	1303.87	1438.37	61.587	15.741	8.061	4.192	0	0	0	17.781	40.11	41.579	107.606	15.124	21.687	0.194	51.754	23.435	2.912	11.816	7.968	27.924	9.119	322.677	15.556	27.471	7.283	23.967	71.121	1654.19	2722.3	10.047	42.702	19.8127	14.2861
1045	528412	43	565.972	561.064	634.945	44.517	24.54	6.659	5.885	3.337	0	20.245	0	3.479	14.635	31.177	12.232	0.539	0	13.556	5.753	3.522	1.405	1.815	15.703	9.274	167.304	8.929	3.477	6.523	30.97	0	717.692	1380.57	31.466	32.566	0.999659	26.0073
1046	528471	62	1279.85	1363.45	1445.16	88.657	20.333	9.859	6.93	2.783	0	0	3.595	14.051	26.211	40.756	17.12	2.61	2.073	20.004	10.078	4.159	1.5	0	35.981	6.238	361.058	33.399	4.136	17.481	53.953	148.611	2003.42	3544.57	8.484	67.491	13.3963	14.3939
1047	530772	64	1615.53	1569.73	1804.89	94.519	38.256	21.121	14.446	0	0	10.398	10.217	9.332	9.756	55.659	0.684	8.237	3.958	22.221	3.822	14.094	1.954	3.965	31.225	0.096	252.379	23.91	14.66	2.368	36.688	10.446	1923.39	3243.47	54.615	51.35	11.5562	7.54814
1048	532324	43	2124.49	1924.19	2305.04	87.848	30.136	9.031	2.116	0	0	8.329	11.793	21.934	17.473	30.721	11.914	6.039	0.4	9.826	26.416	0	9.446	2.051	26.587	2.646	309.129	30.578	2.725	0.163	31.135	13.949	1823.01	3218.14	36.607	40.624	11.0445	20.9685
1049	532632	39	2156.03	2262.16	2716.71	78.839	55.921	29.462	21.082	0	1.94	0	20.707	32.997	6.199	95.578	6.522	5.242	1.668	84.146	11.471	11.836	0.135	31.671	89.729	0.307	540.193	71.931	6.757	2.326	49.546	223.823	5459.38	9867.89	28.33	60.216	26.7601	0.781694
1050	532989	32	939.672	850.777	997.679	33.797	23.913	8.874	4.661	0	0.063	21.776	7.318	24.894	20.286	119.857	45.257	12.909	0	23.471	17.685	26.037	18.451	11.986	24.758	3.155	266.567	35.76	13.234	41.884	21.156	12.967	1638.06	3091.33	8.669	26.731	13.5356	3.62934
1051	534880	41	969.803	1031.67	1189.06	43.465	27.668	2.414	23.412	0	0	9.654	9.252	25.234	22.52	27.366	12.229	4.986	1.153	12.278	12.208	4.085	7.176	7.542	17.022	3.983	221.526	13.437	3.692	1.665	16.903	13.416	1740.65	3071.37	24.293	53.788	6.10058	15.9583
1052	537247	50	860.998	837.117	933.565	26.034	23.442	11.892	3.765	4.31	0	10.504	2.12	17.332	0.947	14.399	2.668	2.479	0	9.706	4.464	0	5.342	0	26.851	0	144.227	0.756	0	0	13.571	1.102	702.867	1268.45	20.838	27.714	-5.46652	15.1208
1053	537363	45	347.915	347.711	411.001	16.265	8.944	2.146	1.01	0	7.105	5.543	2.584	0	0	20.238	3.04	2.495	0	6.927	13.757	0	0	0.283	3.242	0	86.415	0.698	6.205	0	0	0	413.163	660.423	5.421	33.79	-11.0619	22.0709
1054	538214	26	1131.46	1053.02	1136.87	52.909	15.302	6.631	2.541	0	0	0	9.398	11.669	10.243	28.619	9.991	0	0	16.471	5.335	0	2.651	2.48	14.845	0	109.541	3.6	8.851	2.149	49.484	1.587	776.828	1505.7	23.05	27.28	-4.76508	15.3849
1055	538695	84	1199.14	1191.13	1335.76	83.098	23.315	17.936	7.647	0	0	0	4.179	19.97	3.406	35.584	0.641	3.465	3.811	37.152	4.271	0.672	10.536	6.863	62.308	1.604	145.124	10.634	0	0	14.406	1.118	746.316	1566.99	36.742	51.565	13.5158	21.0157
1056	540819	30	1347.44	1389.7	1517.86	102.3	24.562	5.267	0.581	0	0	0	5.312	12.988	1.26	14.739	7.209	4.945	0.46	24.192	2.067	2.224	0	0	23.092	0	146.496	11.827	2.14	0.196	7.747	0	955.615	1764.03	28.03	22.422	5.23598	16.8196
1057	542799	70	4045.41	4043.21	4873.15	196.913	49.212	25.903	3.539	0	0	17.575	4.991	5.647	253.095	24.058	14.771	0	0	16.106	15.722	0	0.815	1.672	15.068	3.353	316.899	7.196	0	0	3.79	11.099	1170.21	2131.71	14.582	58.906	-1.29987	18.3796
1058	543938	33	2354.19	2446.16	2684.46	106.247	38.01	24.13	9.057	0	1.778	22.927	1.656	20.045	1.967	26.086	7.625	10.836	0	36.954	31.243	67.028	5.953	11.487	70.368	11.451	516.225	19.091	2.283	0	17.021	27.419	2701.19	4670.52	45.972	66.636	14.3374	0.934957
1059	544450	35	1000.51	1087.01	1497.24	46.629	25.79	12.162	10.027	1.062	0	0.299	8.379	16.439	4.144	54.227	1.602	1.49	3.749	32.322	0.395	4.66	8.888	0.891	37.536	0	222.947	19.989	0	2.702	11.954	10.366	2097.62	3230.91	35.462	17.729	13.7239	14.8351
1060	544774	32	1569.86	1702.09	1845.79	75.994	23.466	13.74	9.149	0	0	1.931	0.285	10.042	7.805	23.029	3.14	5.116	0	19.284	15.914	9.427	2.375	1.199	13.768	8.474	174.982	10.994	3.846	0	28.977	8.93	1900.17	3640.16	24.706	33.818	3.52525	12.9979
1061	545621	39	1384.08	1524.74	1574.2	78.946	14.204	6.68	9.784	1.837	0	2.865	10.615	14.117	8.633	56.173	9.216	3.855	0	30.036	25.426	2.903	0.636	5.641	31.743	1.558	266.344	19.976	12.994	0	2.544	32.775	2858.09	5282.17	12.444	42.565	13.7401	15.4888
1062	545837	65	1096.22	1139.3	1209.33	61.362	21.597	2.223	6.188	0	0.696	0	8.233	13.552	10.293	13.558	3.091	1.217	1.771	6.077	0.847	48.79	0.298	2.076	55.028	0	91.941	22.357	0	0	0.299	0	619.042	958.308	39.65	55.193	3.51439	8.63542
1063	546010	43	680.011	739.587	765.422	28.737	33.971	9.587	0	2.983	0.556	0	8.412	21.785	0.827	21.373	1.034	0.206	4.494	3.013	2.162	2.649	6.661	0	12.687	3.003	143.427	11.836	0	4.077	16.895	90.131	894.389	1384.51	24.472	46.286	-4.69062	17.4845
1064	546186	28	652.268	641.891	616.658	41.408	7.874	2.658	0	1.152	0	5.829	5.211	8.345	5.413	8.825	0	0	0.738	5.053	3.387	4.624	2.027	0	11.653	0	75.236	3.315	0	0	0	0	467.542	767.724	9.786	0.845	-7.34848	17.3862
1065	547261	33	1581.33	1762.86	1891.62	89.485	25.11	9.838	6.676	0	0	20.237	9.916	35.164	15.552	124.371	14.216	10.104	1.161	34.143	30.949	10.295	16.794	18.687	68.153	1.234	444.751	23.337	14.687	11.722	39.446	25.86	3405.78	6458.32	20.662	82.536	20.1448	1.84848
1066	548079	30	997.715	1016.28	1237.12	55.01	0	5.147	0	0	0	2.718	0.424	10.92	2.757	12.735	2	0	0	3.119	18.867	1.75	7.693	0.765	2.384	0	95.633	2.103	0	0	11.205	3.942	810.93	1537.08	32.454	25.488	-10.7205	18.3473
1067	549767	43	1144.36	1166.17	1140.98	63.744	27.275	14.281	0.232	6.804	0	53.035	6.339	34.379	15.23	31.984	2.504	0.083	7.39	5.003	10.86	0.114	20.067	21.025	5.851	0	87.492	0.461	0.94	1.921	10.752	0	985.434	1775.24	3.808	80.304	-9.2978	15.4033
1068	549799	35	755.896	743.872	921.018	32.549	21.801	3.355	1.919	6.079	0	7.08	5.892	15.852	8.902	26.623	5.66	0	0	8.46	4.401	0	0	8.793	20.457	5.202	128.95	23.032	1.115	4.968	2.569	120.029	1526.65	2953.9	50.078	55.815	5.37843	20.3624
1069	550057	42	1709.23	1942.57	1983.72	84.843	34.32	11.397	6.424	0	0.797	8.296	13.305	36.588	5.834	47.968	9.835	0.071	0.89	15.787	8.837	18.531	6.046	3.469	71.213	10.597	280.869	20.407	11.554	1.711	11.518	2.896	1936.66	3426.01	49.082	147.618	14.242	8.3697
1070	550676	35	1378.09	1324.27	1498.94	76.366	9.445	9.796	13.049	0	0	0	16.842	36.944	16.678	109.481	15.696	11.611	1.96	22.61	20.369	0	2.064	24.024	26.489	13.326	329.344	7.647	3.996	18.273	40.394	23.921	1473.76	2857.9	9.665	68.083	10.7857	16.9513
1071	550983	35	1193.46	1248.56	1291.2	61.625	18.951	22.689	10.568	0	0	0	13.14	16.165	2.125	29.318	7.901	0.913	0.81	11.359	16.731	0	0	4.764	22.833	0	183.007	15.057	3.297	0	16.213	10.421	1698.92	2844.52	27.123	39.522	6.02621	20.1329
1072	551031	35	1774.75	1677.32	2018.24	86.039	44.299	13.728	1.287	0	0	44.514	6.537	1.377	9.16	537.821	5.086	0.453	0	14.112	1.892	278.491	5.374	1.973	7.486	0	1174.64	0.18	0	3.973	0	5.738	1372.25	2557.95	37.844	39.002	-5.57494	-5.46616
1073	553346	26	1024.31	1088.08	1290.44	60.986	15.824	12.194	1.287	0	0	14.67	15.493	9.59	7.798	31.025	2.597	0	0.285	10.92	12.241	0	4.559	0.759	34.714	1.923	278.44	15.42	2.537	1.122	21.58	7.243	1299.43	2369.93	17.172	33.148	5.95	22.5826
1074	553791	39	957.903	971.214	971.717	54.192	27.686	2.798	1.101	0	0	5.249	4.984	5.907	0	305.262	0	1.317	0.421	15.168	0	0	7.473	4.086	17.643	15.34	442.057	17.915	0	0.23	2.584	0	404.216	686.605	41.756	5.235	12.0465	-1.02352
1075	554397	28	616.44	672.624	701.857	37.9	14.182	1.804	0.337	2.844	0	0	11.133	14.754	21.516	25.862	2.508	0	0	4.475	1.197	0.85	2.893	0	11.797	0.41	99.346	1.175	0	6.89	5.242	7.032	719.449	1344.49	0	65.289	-7.9493	15.8657
1076	554655	37	511.652	437.917	589.127	31.416	7.616	0	4.29	0	0	2.736	9.974	0.679	3.613	27.728	2.947	0	0.968	0	2.652	0	0	6.572	7.892	4.73	86.19	13.537	0	0	19.265	0	903.037	1610.6	1.224	34.551	-5.05388	25.4412
1077	555355	27	189.595	241.398	253.055	10.842	3.708	6.043	3.302	0	0	1.313	0	0	0	0.613	0.138	0	4.091	0.389	0	1.032	0	0	14.511	0	31.544	10.363	0	0	7.796	0	451.585	715.827	8.051	1.226	-7.99462	30.5169
1078	555442	61	1663.67	1646.17	1800.59	105.358	50.026	7.364	3.22	0.019	0	0	6.692	21.023	3.597	41.654	9.671	5.644	1.767	36.69	0.789	4.376	0	4.867	29.252	0	205.805	16.256	13.899	1.146	17.433	27.391	1549.31	2904.83	6.857	45.446	12.9496	14.7847
1079	555840	38	1256.48	1319.78	1556.35	36.295	11.923	8.846	0.044	0	0	0	10.635	20.392	0.902	26.153	8.028	9.694	0	7.491	10.165	0	0	0.727	21.273	1.15	197.083	2.585	0	0	11.134	0	1205.29	2022.39	17.647	15.541	-4.11597	15.057
1080	556877	44	1569.29	1429.52	1558.1	77.867	15.095	18.997	8.302	2.585	0.706	0	0.863	17.311	14.339	30.136	0	4.943	4.534	23.649	10.659	7.92	9.126	10.039	26.73	0	245.539	20.837	6.774	2.274	10.786	4.741	1133.84	2169.57	12.54	44.741	11.628	12.8261
1081	557512	82	2029.06	1958.25	2278.54	98.179	47.617	40.311	2.745	0	0	25.665	11.543	59.406	3.574	74.543	9.83	13.12	4.16	25.757	4.452	0	2.8	9.409	29.234	1.35	323.084	6.686	0	0.23	38.719	12.346	1734.97	3245.45	7.562	85.247	10.694	16.8943
1082	557815	40	813.718	735.367	924.772	51.665	4.899	10.484	10.682	0	0	0	1.247	15.805	0	22.814	30.017	4.379	8.322	15.78	4.687	4.811	3.94	0	12.736	0	127.719	19.965	0.855	6.792	22.949	15.902	1295.94	2302.72	2.26	13.023	4.91973	16.1822
1083	560604	31	1087.81	1232.44	1345.49	39.484	27.622	13.836	5.949	0	0	1.429	10.025	17.772	18.145	54.163	7.731	4.048	1.003	6.422	8.816	3.256	2.362	0	19.388	0.172	149.432	16.412	14.425	8.378	5.519	17.575	1361.38	2408.34	28.796	30.921	6.28771	14.9991
1084	560983	38	1894.73	1885.5	2067.42	88.194	38.164	29.328	30.515	0.514	0	7.257	11.227	30.122	11.879	102.878	7.458	2.757	2.417	40.274	11.589	0	10.445	6.603	55.477	2.693	330.734	51.225	16.44	5.026	120.95	20.07	2766.19	4989.78	20.912	55.589	23.2912	16.6852
1085	561379	61	1068.06	1187.47	1287.19	55.901	24.357	2.184	1.068	0	0.751	0.409	0.314	19.553	28.698	101.799	45.571	18.61	2.49	23.223	4.342	12.229	16.266	18.683	56.566	6.258	170.145	17.387	8.215	22.311	18.213	26.683	1077.14	1875.74	34.541	67.345	15.151	6.70968
1086	562751	44	2433.4	2264.36	2581.64	120.883	37.664	12.478	9.693	0	0.178	14.033	42.932	126.875	21248	269.802	11.873	1.593	2.947	10.746	28.834	14.778	12.175	101.061	14.473	1.424	321.126	16.83	4.855	5.149	41.698	41.275	2038.87	3794.35	4.566	57.098	-7.17529	3.21105
1087	563121	64	2378.41	2430.07	2743.65	146.612	33.984	23.897	27.196	0	0	3.784	11.177	22.296	8.823	111.286	11.964	15.583	5.954	63.905	29.887	12.575	12.428	5.293	88.47	0	381.837	35.824	0	7.82	27.738	71.591	2524.32	4674.03	33.541	72.926	21.6107	2.62946
1088	563915	55	1425.11	1341.51	1518.52	104.561	31.392	12.373	15.777	0	0	6.401	21.441	13.857	14.793	96.214	18.673	10.837	2.594	43.167	13.176	4.712	0	4.672	61.788	0	296.777	25.854	3.695	8.291	41.094	31.566	2293.72	4380.38	48.111	58.304	20.8609	12.611
1089	565182	36	1124.01	1036.63	1159.97	59.285	12.302	11.1	8.02	1.501	0	0.498	7.83	16.386	22.603	54.335	20.417	3.938	0.967	33.138	13.883	3.697	15.165	10.72	39.086	5.416	217.953	7.776	4.813	10.215	35.928	13.347	1270.11	2109.07	3.993	31.275	11.6147	16.6232
1090	565381	30	1628.38	1620.65	1733.55	59.389	18.404	14.25	9.033	0	0	14.795	3.133	39.562	5.279	31.999	11.976	10.143	2.926	6.552	11.754	0	0	4.85	22.232	1.487	275.771	27.986	0.428	2.531	15.467	7.337	2201.74	3799.81	19.505	45.72	5.11524	18.5866
1091	565614	42	936.921	949.682	1087.77	38.644	18.26	6.097	2.999	0	0	0	5.701	31.501	16.01	49.511	16.603	10.966	3.847	9.974	18.073	0	11.641	10.5	21.221	0	171.164	10.216	10.945	19.96	5.409	24.07	1162	2215.98	8.491	35.696	6.56141	17.7838
1092	565800	34	994.593	1018.2	1046.91	31.718	21.379	13.006	9.296	0	2.688	48.509	3.187	14.097	7.353	21.737	7.531	2.397	0	0.281	2.69	0	0.871	5.127	26.909	0	109.076	12.046	0	0	38.996	13.211	1028.28	1944.76	57.358	65.624	-0.577454	19.8352
1093	566584	38	1791.42	1769.83	1946.34	91.532	31.932	23.641	4.415	7.474	0	4.944	17.052	14.628	4.158	69.976	7.29	0	1.49	45.503	10.502	0	6.087	5.616	50.792	0	394.525	26.067	0.774	3.943	13.034	28.963	3119.99	5457.59	16.476	31.764	22.9718	16.528
1094	567076	41	1617.54	1607.76	1744.78	91.006	26.561	8.419	0	0.048	0	53.437	1.907	15.971	13.029	2113.81	9.378	4.545	0	22.523	0.26	12.093	2.359	0.512	15.734	59.708	9992.59	31.169	0.16	0.743	1.202	0	1051.26	1940.85	70.537	38.486	-14.242	-26.0741
1095	567249	30	847.989	842.484	896.012	59.32	25.301	14.247	5.983	0	0	0	4.903	8.632	16.987	91.72	16.837	0	5.136	14.209	24.821	7.014	7.993	15.28	20.81	1.486	245.932	17.736	6.089	13.089	22.95	71.152	1900.87	3331.8	15.3	41.951	9.78325	11.7891
1096	568464	69	1261.96	1297.62	1584.06	63.304	27.185	9.871	23.971	0	1.581	16.217	17.572	47.45	21.06	74.924	16.334	10.512	5.802	14.537	14.66	4.861	7.925	2.415	53.56	2.478	246.972	22.399	8.395	3.223	27.089	20.525	1496.82	2732.75	1.795	70.688	16.1856	12.1779
1097	568602	30	723.06	643.793	823.761	19.28	7.021	5.961	3.125	2.48	0.98	4.621	6.735	7.633	2.102	28.945	14.893	2.518	2.049	7.416	5.439	0	3.943	0	12.941	0	86.178	3.584	15.643	8.492	12.777	2.577	605.872	979.136	10.643	55.557	-6.35636	16.6192
1098	569006	76	968.24	1100.49	1199.18	64.239	31.531	19.034	9.176	0	0	4.129	13.328	18.389	21.968	42.677	6.948	2.428	0	16.733	30.92	0	7.644	14.049	37.927	0	268.004	17.489	7.582	0.757	62.766	27.269	1559.21	3128.45	3.491	33.455	12.518	20.1704
1099	569201	42	1503.77	1556.06	1623.25	66.356	16.316	19.2	2.914	0	0	0.02	6.468	7.232	17.584	32.828	14.163	6.436	5.213	6.534	0	3.981	4.711	0	25.599	8.578	190.67	12.925	8.7	4.67	21.161	0	1436.65	2251.86	70.694	55.59	1.99906	21.7042
1100	569447	26	496.151	500.102	574.237	13.391	0.977	10.705	0	0	0	0	1.847	9.244	0	10.928	0	0	0	0.1	2.006	2.094	0	0	10.252	0	50.432	0	0	0	4.751	0	363.528	620.197	29.846	3.88	-10.8668	18.0416
1101	569480	23	242.394	310.925	356.527	9.364	18.849	5.123	9.46	1.966	0	0	5.146	1.432	10.203	32.259	87.937	0	2.399	27.722	0.063	0	5.939	0.058	27.197	0.229	127.156	6.247	0	0	8.385	8.722	725.707	1403.82	1.948	28.239	2.95441	27.2526
1102	569901	32	983.155	1082.91	1238.42	45.53	14.88	11.312	1.963	1.205	0.788	0	4.348	15.63	3.467	17.39	5.715	0	0	2.288	0.581	0	2.719	8.398	9.058	11.897	196.703	16.049	3.544	0	26.5	8.485	1356.47	2455.69	13.187	24.495	-4.38238	18.1321
1103	570552	72	8358.54	8667.08	9419.69	330.174	89.587	47.923	5.169	0	0	26.65	23.173	61.602	18.303	185.017	11.773	57.914	4.005	53.87	27.955	30.372	14.763	12.015	61.634	7.352	800.679	56.738	13.371	36.619	98.481	112.765	4655.89	8460.57	21.062	139.907	22.6421	-4.3876
1104	572016	32	1471.4	1613.8	1732.81	54.375	35.918	16.023	7.273	0	0	1.819	24.992	65.601	27.131	320.176	22.457	9.502	0.013	34.112	43.298	23.775	10.672	21.991	52.206	3.155	327.619	37.951	16.292	25.977	52.615	36.753	2148.85	3540.53	11.031	176.204	20.9941	-3.47626
1105	572658	35	789.996	745.275	883.941	35.241	15.457	6.414	4.216	0	0	0	4.379	13.556	7.775	63.089	11.382	4.797	0.594	18.922	13.01	11.604	5.837	8.956	12.365	0	125.742	4.532	5.176	5.884	8.4	10.317	1033.61	1913.78	35.752	25.017	4.82036	11.1173
1106	572711	29	1395.65	1346.91	1559.6	89.623	21.581	14.943	10.293	0	0	1.78	18.706	22.274	15.888	81.832	22.035	6.582	2.333	5.871	7.43	7.771	9.075	17.502	33.124	0	239.145	16.401	0	13.164	51.072	28.379	3036.7	5363.61	7.461	59.265	7.11321	13.2157
1107	573174	76	1560.07	1460.66	1671.73	59.814	47.671	17.15	9.725	0	9.787	0	14.501	33.365	16.341	87.902	25.918	1.836	0.349	31.783	25.215	0	5.459	6.472	38.763	0	283.482	23.479	10.556	4.606	41.98	24.065	1709.54	2932.76	9.249	61.993	20.4971	15.9062
1108	573609	60	824.709	661.498	869.214	40.943	24.291	11.928	0	0	0	0	1.144	19.517	9.671	45.672	5.639	1.583	0	33.256	11.607	0	6.919	7.253	24.442	0	98.138	3.175	2.912	7.156	20.516	8.587	692.443	1337.55	6.995	42.064	8.55344	17.6916
1109	574151	47	607.752	701.898	782.645	41.954	23.188	4.927	1.431	0.633	0	0	5.75	0.33	7.175	14.15	0	1.106	6.636	5.584	6.096	0	0	0	2.281	1.067	92.221	0	0	0	7.763	4.658	482.568	920.192	10.127	0	-11.2785	22.0758
1110	574732	33	1389.72	1534.77	1658.93	96.081	37.286	9.182	17.639	0	0	0	8.026	46.964	0.798	26.157	11.093	7.367	2.572	21.409	6.737	5.869	0	2.118	46.359	11.071	334.78	51.532	37.948	1.664	0.919	10.783	1630.29	2989.03	12.594	59.877	19.301	11.8768
1111	575772	42	1760.75	1962.29	2120.3	121.368	33.588	9.769	8.686	0	0	0	5.626	42.002	18.565	44.161	26.924	9.868	0	26.474	8.689	8.238	0	9.402	31.345	3.143	255.383	12.003	5.333	1.388	26.397	29.507	1635.43	2765.96	19.87	47.989	14.2585	11.1872
1112	576647	36	1839.46	1808.75	2184.44	79.324	44.016	8.841	15.897	5.683	0	0	6.989	11.53	22.5	69.322	20.737	4.904	1.054	63.793	9.26	2.84	0.537	0.615	46.331	7.514	359.224	51.204	0.958	3.508	26.454	21.575	2461.36	4307.17	18.839	96.275	22.3077	13.4454
1113	576767	48	613.967	597.056	627.497	27.314	29.631	11.738	7.475	2.231	0	10.588	0	3.693	16.973	36.603	32.817	0	2.451	5.416	16.569	2.621	4.951	12.265	24.686	0	162.864	17.296	0	0	14.623	28.544	1186.06	2101.5	42.628	57.709	1.90349	23.9443
1114	576798	40	1733.49	1811.28	1973.02	71.841	33.013	19.852	3.862	0	0	3.414	7.86	24.876	0.054	41.801	2.918	9.805	0	30.496	7.832	1.431	3.494	0	43.211	0.288	190.132	20.31	2.99	0	6.245	26.394	1214.84	2485.41	35.928	68.196	14.5138	17.5517
1115	577752	42	1933.77	1871.82	2265.65	70.311	35.148	15.255	6.043	0	3.859	7.71	14.165	24.108	6.556	31.878	4.19	13.257	0	14.579	17.603	15.785	0	6.127	66.187	3.393	478.141	26.617	11.824	3.35	32.297	30.519	1908.02	3254.23	30.613	62.26	12.0754	8.76338
1116	578622	54	701.131	721.591	794.406	48.128	14.22	8.48	0.349	0	0	0	2.74	15.731	3.222	35.066	1.471	0	0	19.476	7.814	1.907	2.419	2.582	27.875	0	80.813	24.169	0	4.193	21.388	2.897	645.263	1075.02	5.347	6.746	6.67765	21.4391
1117	578907	82	1958.18	1886.65	2140.45	79.842	31.855	16.29	10.803	0	0	27.2	6.436	9.813	9.555	68.35	16.525	16.948	1.115	44.487	37.143	5.03	0.617	10.932	42.162	6.823	369.981	34.655	30.443	2.256	32.874	13.696	2642.79	4485.29	5.696	117.604	19.5456	7.27521
1118	579087	42	2082.98	2009.36	2398.97	112.07	36.166	27.802	2.233	0	0	7.552	2.749	15.22	8.085	57.564	10.263	19.379	9.57	53.565	22.668	0	1.789	4.694	39.069	1.953	362.081	20.839	0.915	0	45.063	30.577	2203.73	4023.73	21.413	25.994	16.755	21.9053
1119	579362	34	1373.81	1338.22	1718.97	85.384	15.937	27.507	1.995	0	0	0	10.891	20.976	4.836	49.205	0	8.774	0.804	20.894	25.363	4.696	0	6.009	28.066	7.168	226.36	19.601	3.58	8.877	34.105	13.144	3078.71	5763.26	14.9	43.842	13.1394	15.2338
1120	579454	41	1123.38	1152.89	1285.14	60.797	22.928	11.189	0	0	0	0	0	7.856	5.777	14.722	2.155	9.725	0.821	48.035	15.157	0.54	0	2.3	56.491	0	177.306	2.381	0	0	14.582	3.242	927.727	1815.1	17.207	62.199	-0.384108	22.5916
1121	579506	29	978.878	1023.57	1084.34	39.088	19.957	7.765	3.114	0	0	12.189	6.745	15.632	6.443	40.605	3.789	1.488	0	32.571	21.979	0	0.147	0	22.037	3.494	225.548	13.279	12.846	0	13.067	24.427	1171.05	2251.39	5.659	17.359	9.28642	21.7568
1122	579608	47	1888.33	1852.41	2126.91	115.137	41.936	21.305	6.288	1.437	0	9.297	7.032	14.45	0.794	29.336	2.029	10.885	1.768	35.332	19.805	0	3.598	14.372	57.734	7.53	389.338	22.613	10.432	0.763	27.273	7.107	2459.4	4244.75	16.337	15.332	17.9552	21.7106
1123	579694	91	2544.26	2361.52	2610.29	156.253	47.006	40.812	30.089	0	6.694	31.277	25.216	19.832	19.396	163.963	29.283	8.042	0	47.094	40.912	11.845	13.989	10.068	58.158	2.182	461.707	24.363	22.458	12.865	38.254	40.985	2441.19	4485.57	24.291	303.213	20.2263	2.93428
1124	580614	48	3524.05	3901.05	3925.49	122.593	26.855	27.715	0	0	0	21.579	1.041	4.86	0	10.637	16.146	0	2.929	6.767	0	4.423	0	0.873	34.869	7.119	174.047	16.457	7.436	0	3.253	0.352	1415.13	2267.71	10.358	25.644	-0.241053	29.483
1125	580976	33	1431.62	1355.63	1477.8	53.149	17.326	15.999	1.953	0	0	11.855	8.453	7.72	9.823	79.617	3.113	0	0	21.428	6.702	0.148	5.159	3.321	16.928	0	341.479	37.328	0	2.85	38.066	188.285	1887.9	3462.23	11.063	15.385	9.87967	24.1598
1126	581078	28	662.165	716.095	790.228	36.558	13.047	6.597	18.858	0	0	1.302	0	11.492	6.942	37.634	2.67	0	0	24.539	3.183	3.829	0	3.949	24.09	0.898	326.613	23.737	0.764	2.058	5.895	0	1183.81	2157.83	6.3	14.05	12.9382	14.657
1127	581636	38	260.679	266.303	296.535	42.583	34.794	6.441	42.924	0	0	7.115	6.419	9.388	7.424	51.171	7.437	1.37	2.078	19.805	17.415	1.568	4.112	0.879	17.343	4.939	342.831	20.78	7.058	7.197	15.097	22.705	1911.76	3676.35	30.833	0	9.36135	23.2582
1128	582318	47	485.6	445.244	581.478	51.5	3.138	14.12	1.571	0	0	0	3.546	8.558	0.009	24.716	3.475	1.747	0	4.309	0	0	0	0.975	1.586	0	89.919	0.809	7.377	2.385	21.446	0	577.032	961.829	26.463	34.051	-10.8659	18.685
1129	582376	42	1576.56	1310.95	1572.3	60.352	10.017	20.339	8.99	0.556	0	0	8.15	26.08	11.332	113.364	13.961	4.904	5.875	21.725	30.332	4.072	3.147	17.765	43.665	2.174	341.076	21.506	8.158	6.522	16.302	36.18	1594.92	2424.72	14.53	80.131	16.7923	11.9026
1130	582461	47	1033.22	1108.74	1271.27	60.18	12.62	14.471	3.566	0	1.655	1.391	12.963	16.814	6.346	41.724	13.473	3.414	3.95	33.367	4.068	6.144	7.545	7.866	28.106	0	181.712	17.332	12.086	2.322	4.57	13.387	1103.91	2068.98	15.902	80.221	12.4302	14.3136
1131	582724	45	1300.55	1104.29	1299.94	46.923	24.783	9.014	0	0	0	8.031	4.654	4.831	4.356	30.161	6.293	0.493	3.01	41.714	13.639	0	4.252	1.522	25.831	4.768	323.122	26.765	2.305	0	14.068	0.615	1788.45	3184.29	18.289	53.632	10.5789	25.5406
1132	582745	42	2270.57	2222.69	2653.73	147.636	42.783	16.864	19.453	0	0	5.227	5.475	20.785	8.601	121.135	18.426	13.45	0	50.995	37.586	3.879	13.173	169.972	78.907	6.582	640.499	51.299	1.707	9.24	208.196	55.541	5256.83	9289.29	21.631	36.846	27.6593	8.59382
1133	583072	32	2142.86	2187.41	2289.8	66.046	33.542	8.163	7.1	0	0	0	16.378	16.929	7.788	46.106	4.656	0	5.148	45.39	7.837	1.897	0.362	3.838	31.648	0	555.469	37.357	8.685	5.07	17.758	17.35	3069.57	5661.33	29.705	40.652	20.3512	20.2183
1134	583115	45	1926.56	1815.65	2225.78	91.978	43.74	14.307	20.138	0	0	24.696	18.675	21.893	10.506	74.04	2.639	7.174	0	42.661	33.008	0.056	12.686	12.009	46.316	0	494.139	25.189	4.01	2.299	33.066	70.081	2800.63	5015.35	3.389	105.68	22.8674	16.1104
1135	583144	30	1541.94	1575.46	1738.09	89.137	32.529	16.879	0.216	0	0	7.198	2.313	11.305	3.072	46.918	6.299	14.358	0	33.906	4.678	12.359	3.941	6.835	37.22	1.427	523.932	14.01	3.309	3.983	49.316	22.808	2663.15	4713.44	77.751	33.457	13.8584	6.82932
1136	583341	89	1527.28	1513.81	1813.15	79.177	37.796	12.408	6.75	0	0	0	13.517	17.935	12.303	47.914	5.073	0	6.751	49.279	20.486	9.482	0	3.607	34.97	9.883	311.792	35.67	7.493	2.961	15.663	24.461	1872.6	3241.72	21.48	95.072	19.1058	9.78067
1137	583457	32	1308.53	1432.87	1517.42	56.359	12.189	20.002	9.591	0	0	9.163	9.064	6.767	4.774	44.783	5.414	7.05	0	42.336	12.098	4.79	0	17.324	32.382	0	253.488	9.884	5.939	3.077	21.095	2.177	2518.11	4613.21	10.307	71.448	10.856	14.5065
1138	583462	63	1628.08	1592.81	1851.69	77.402	25.421	15.978	2.543	0	1.379	41.02	14.337	3.305	7.25	319.758	8.277	0	2.204	22.412	1.534	1.895	0	4.984	20.92	0	183.775	9.173	4.058	0	7.001	5.45	911.974	1833.21	73.415	80.009	11.0048	0.39843
1139	583714	38	1338.03	1395.16	1645.22	64.115	13.211	13.592	9.504	0	0	9.288	15.958	13.518	5.61	35.919	0	0	0	11.155	0	1.458	0	0	41.96	0	207.339	5.432	0	0	5.487	0	1619.63	3065.29	30.634	27.592	5.59185	20.073
1140	583847	78	1105.99	1021.99	1131.92	71.607	23.012	14.071	18.678	0	0	13.189	12.478	29.208	30.7	63.06	9.317	7.077	3.258	23.449	18.42	3.266	9.342	16.997	52.976	0.894	223.454	23.224	18.872	14.893	15.796	24.255	1280.84	2115.26	22.175	20.565	16.6894	14.4741
1141	584426	62	883.673	925.203	1040.28	41.648	32.961	0	2.746	3.171	0	16.667	8.201	15.636	15.667	17.528	20.719	0	0	10.691	4.893	1.199	5.069	2.345	13.328	1.172	186.854	16.33	0	0.344	19.336	3.754	753.819	1243.66	30.314	96.118	-1.636	17.7342
1142	585008	36	3286.24	3351.76	3762.89	115.564	25.264	15.778	4.186	0	0.805	3.335	11.236	31.369	9.294	31.307	15.727	7.468	7.79	21.709	20.77	7.56	3.706	11.439	20.209	13.436	440.548	18.726	0	16.602	35.801	31.892	2870.9	5263.13	14.043	28.08	13.0533	10.0174
1143	585057	31	2621.47	2603.58	3128.58	114.979	32.717	5.234	3.462	0	0	13.843	0.388	7.166	8.497	33.027	7.996	6.087	4.423	56.484	24.247	3.569	10.836	1.262	93.486	1.848	462.413	39.488	7.963	1.461	60.307	0.136	3656.06	6344.25	4.843	31.89	21.8204	21.2426
1144	585984	51	898.056	1046.85	1079.42	64.611	24.103	19.189	12.574	8.64	1.717	0	3.448	16.148	1.17	51.522	10.49	8.883	5.967	12.66	12.437	2.136	0	2.397	34.376	2.918	111.005	11.209	0	0	14.003	89.78	1282.3	2281.16	13.248	0.214	5.61897	20.0752
1145	586024	42	1580.7	1555.7	1759.66	65.372	23.311	10.218	8.305	0	0.084	10.712	9.76	39.568	1.227	58.5	10.774	12.093	1.928	9.692	13.351	7.191	0	3.946	48.147	0	255.94	13.522	0.805	6.351	24.108	14.728	1923.77	3514.08	38.225	28.252	15.3364	11.6769
1146	586031	36	1941.33	1956.06	2326.79	80.138	26.807	10.398	0.88	0	0	0.696	8.087	0.154	17.04	24.208	5.926	1.339	0	9.414	0	0.512	6.346	0	31.347	0	145.816	16.026	4.902	0	1.756	11.908	1431.07	2327.23	66.32	67.227	1.54364	28.2683
1147	586094	51	3268.76	3281.94	3521.27	123.411	34.917	29.551	0.651	0	0.381	36.706	0	4.025	7.769	1113.64	4.341	9.899	0	4.473	0.811	6.411	3.591	9.692	26.086	8.346	205.75	3.245	8.577	1.56	11.712	8.637	1153.24	2329.38	8.795	27.439	1.90563	4.91325
1148	586466	37	1467.81	1536.38	1739.66	43.171	29.058	23.038	5.607	0.227	0.129	9.618	1.983	17.297	6.961	28.957	11.897	1.04	0.961	19.43	11.486	0	0	3.483	17.229	0	174.129	26.212	0	0	20.162	0	1566.99	2915.99	19.186	55.687	9.24044	21.1623
1149	586741	63	3356.45	3380.24	3600.91	168.505	48.665	16.905	9.26	2.554	0	12.072	13.382	23.954	10.686	76.609	3.759	10.811	8.585	47.898	46.676	50.081	7.251	3.536	88.142	11.633	617.568	42.679	43.263	5.349	61.644	43.966	3102	5732.67	49.412	117.908	19.0091	-6.16256
1150	587244	40	1151.91	1166.29	1352.9	104.008	42.972	14.807	14.659	0	3.617	0	18.696	28.597	11.042	71.479	2.811	2.724	0	39.306	0	0	1.71	10.599	62.878	14.514	446.276	40.052	5.734	0	3.123	31.409	2615.65	4532.31	52.871	11.712	23.1321	16.3528
1151	587757	30	1592.24	1493.66	1900.84	80.122	37.191	18.931	4.798	2.073	0	6.56	14.101	18.892	3.136	50.23	4.175	10.336	0	45.389	7.315	1.131	0	2.999	33.45	0	236.8	30.172	4.163	0	8.742	1.045	2473.6	4841.02	38.44	47.536	17.2925	20.2659
1152	587906	36	539.163	655.73	661.89	38.719	11.991	1.329	3.568	0.645	0	1.502	5.699	19.027	4.243	41.846	4.697	2.559	0	21.023	1.888	4.773	2.193	6.147	53.85	0	141.134	21.18	0	0	17.996	10.191	1212.28	2021.43	2.44	48.081	11.7071	14.4346
1153	588156	41	1105.3	1182.97	1266.83	56.469	33.454	15.517	3.583	7.485	0	0	19.805	28.612	6.031	37.621	8.707	3.961	2.896	23.709	6.626	6.451	6.196	8.427	41.024	4.404	263.558	11.017	7.718	0	0.428	4.419	1391.21	2506.63	21.037	95.487	14.095	11.7033
1154	588302	36	1401.75	1486.44	1786.37	62.29	20.766	17.866	9.071	0	3.284	0	4.775	26.71	3.71	60.829	11.904	8.4	1.703	28.53	1.552	3.71	3.817	0.992	45.774	4.73	249.539	33.329	7.676	0	6.551	15.773	1835.43	3268.25	8.003	31.865	17.9235	13.6619
1155	588791	68	696.923	573.965	620.363	17.643	20.538	0	1.721	0	5.675	70.708	0	20.673	8.444	16.172	10.071	0	0	9.326	0	0	0	0.995	10.214	3.694	90.2	1.824	0.376	0	6	8.592	927.809	1737.37	44.895	95.154	-6.76109	15.3135
1156	588795	54	2167.17	2138.27	2461.04	98.384	54.196	17.83	0	0	0	5.486	9.765	15.011	14.01	87.876	9.331	17.458	6.437	64.477	24.897	0	1.298	6.647	65.335	0	379.443	32.23	0	0	3.181	8.755	2604.15	4648.47	11.874	136.938	23.8107	17.472
1157	588874	69	10837	11318.5	12502.8	505.59	109.824	65.96	2.724	0	0	6.223	5.6	506.839	1.005	24.797	10.987	1.684	0	48.283	8.863	5.113	3.013	3.013	23.221	6.845	303.948	14.815	0.819	0	0	1.497	3891.6	7286.06	22.652	66.256	-12.4765	9.77387
1158	589622	36	6707.7	7076.23	7764.16	295.147	31.69	10.093	5.373	0	0	24.306	6.575	45.385	18.126	154.877	31.631	31.233	0	13.846	5.694	31.288	0	5.732	44.657	0	360.659	3.037	0	4.909	0	33.993	3285.69	6074.72	14.964	86.1	6.88419	7.39275
1159	589822	36	1070.36	956.87	1050.41	61.555	8.577	3.173	1.033	0	0	0.806	0.287	14.094	6.657	10.852	0	0	0	9.013	0.979	6.134	0	0	11.038	0	84.579	0	0	0	11.356	0	548.148	989.667	14.393	0.704	-6.51325	13.1337
1160	590426	44	6407.89	6540.48	8050.71	298.507	72.252	34.59	0.508	0	0	8.14	8.91	31.63	10.287	59.275	1.222	16.964	0	55.964	9.9	29.861	6.245	5.231	43.175	2.175	331.252	26.45	0	6.55	19.477	438.806	3494.98	6452.51	6.311	85.827	16.6316	1.27135
1161	590688	48	588.866	490.688	711.033	26.542	8.337	10.431	4.204	5.009	0	49.585	1.572	8.761	10.794	37.292	4.213	2.69	2.764	0.733	2.262	4.468	4.017	0	5.186	3.236	89.542	6.394	10.339	0	49.384	0	1024.67	1703.79	77.282	118.898	-7.60361	20.3558
1162	590874	81	895.727	1066.43	1172.01	80.8	40.463	20.148	11.793	0	0	0	4.735	16.316	7.652	75.712	12.731	0.08	4.852	11.968	27.147	9.254	0	2.209	40.432	5.998	294.445	12.36	15.167	4.303	3.783	94.348	1574.47	2753.14	16.127	59.85	10.4359	11.4026
1163	590968	34	2609.74	2853.65	3118.36	138.377	18.386	17.536	6.885	0	0	0	10.232	30.535	20.402	58.174	8.478	26.58	0.592	18.016	13.387	32.279	6.714	3.251	49.963	2.524	456.058	32.449	2.124	0	23.178	8.253	3762.91	6579.56	48.042	41.862	15.9044	1.21189
1164	591313	34	4025.51	3914.24	4624.18	180.651	45.438	26.405	12.847	3.976	0	0.225	13.32	29.52	20.163	138.45	22.146	8.033	0	52.536	24.897	23.123	2.028	16.101	73.006	13.716	916.024	46.718	12.109	0.497	16.505	16.282	6669.35	12231.5	19.179	21.484	23.1779	0.15359
1165	591369	36	1764.34	1760.62	2157.56	91.495	22.652	9.853	0.273	0	0.487	14.035	9.438	18.584	0.867	48.801	17.246	10.869	6.177	19.562	6.533	0	0	0.232	13.152	0	283.137	14.657	3.747	1.718	12.763	4.84	1410.56	2323.41	28.883	63.351	9.25871	21.0227
1166	591742	50	981.818	934.754	1101.05	38.794	12.96	0.092	1.464	0	0	80.846	0.873	23.912	6.25	27.918	0.488	0	1.366	8.124	0.466	2.284	4.74	6.368	12.387	0	61.196	11.396	7.927	0	16.27	3.508	1043.59	1772.31	68.098	86.922	-3.96835	13.9754
1167	592163	39	1946.83	1759.35	1962.1	63.556	15.006	24.852	14.501	1.355	0	0.433	1.921	16.906	16.194	56.992	12.765	6.39	3.85	23.367	7.005	19.057	4.744	4.099	29.87	0	211.072	6.809	7.001	0	42.524	3.36	1934.73	3547.3	31.076	64.814	5.73387	10.0752
1168	592539	48	1441.27	1426.4	1614.86	69.837	24.651	16.825	6.73	5.878	0	4.252	16.752	70.179	42.12	152.752	22.783	38.754	3.15	32.809	20.599	14.299	14.155	23.83	27.047	6.208	262.188	44.919	12.101	18.744	46.111	23.708	2105.98	3535.19	7.111	77.92	22.6013	5.7658
1169	592623	32	2386.92	2495.33	2582.77	106.271	35.138	25.166	8.205	0	0	58.474	20.31	40.63	14.201	236.433	41.108	14.14	6.864	50.599	21.089	10.641	5.786	64.57	50.171	10.033	716.197	19.999	18.535	15.519	167.564	162.557	3661.48	6761.96	12.939	75.403	21.1342	0.00239283
1170	593673	39	1525.02	1615.72	1601.52	84.754	23.038	21.91	13.485	0.147	0	4.618	6.447	48.767	15.148	135.345	17.657	8.342	3.068	36.233	4.801	0.435	4.711	18.296	37.273	1.261	294.323	28.903	9.539	7.627	25.185	59.043	1891.96	3688.84	6.049	66.842	21.5956	14.8815
1171	593882	44	1267.33	1271.45	1395.22	59.542	22.824	18.977	3.59	2.056	0	6.134	6.313	15.319	12.282	39.712	8.891	12.253	0.007	9.155	5.63	11.844	10.894	0	22.822	0	279.262	17.39	8.44	1.814	15.543	12.316	1603.42	2947.76	2.563	27.08	6.82219	12.2494
1172	593954	39	1977.75	2032.19	2415.78	95.304	27.465	31.754	0	0	3.831	23.059	0.554	0	1.543	8.953	4.847	0.241	0	8.083	5.005	0	0	0	18.24	0	54.27	11.443	0	3.409	26.971	19.493	1041.55	1602.13	2.565	17.711	-6.02338	29.2725
1173	594502	35	1373.15	1288.37	1502.9	70.078	34.553	26.263	4.95	0	0	0.861	6.817	22.47	12.886	28.598	16.534	8.333	0	26.715	15.27	0	0	6.755	31.741	0	273.478	14.193	0	0.848	30.727	7.307	1490.87	2661.7	0.92	0.027	13.531	20.1087
1174	594658	43	988.286	957.12	1123.6	83.006	23.698	11.648	1.327	0	0	3.09	0	2.298	0.986	45.173	0.48	0.666	0.433	11.51	13.138	0	5.701	2.016	2.276	0	147.879	0	1.775	3.764	0	7.492	923.235	1848.03	18.564	76.989	-9.38028	21.7626
1175	595110	44	5884.85	5772.71	6972.02	308.736	58.635	31.863	5.274	0	0	22.751	4.728	24.872	4.964	56.786	2.508	17.791	0	13.107	11.074	0.819	1.917	3.441	21.103	0	242.471	21.277	3.988	9.077	11.559	56.012	3191.57	5990.79	9.944	101.778	11.9714	18.1809
1176	595224	33	666.872	596.258	755.596	41.409	8.138	0	1.89	0	0	6.73	6.539	3.867	7.639	15.276	11.548	4.919	3.437	24.151	5.149	4.294	0.555	1.279	5.987	0	145.931	13.653	0	7.264	16.246	5.874	832.293	1376.99	25.308	11.093	0.105269	28.6865
1177	595504	75	1538.4	1457.29	1784.01	96.86	42.279	5.169	13.262	6.326	0	2.616	7.57	20.926	17.124	32.598	9.243	1.553	6.117	24.513	23.986	30.806	6.433	12.339	43.935	11.455	366.685	18.588	0	2.295	25.94	53.233	1521.24	2593.13	26.058	75.275	11.1199	7.79076
1178	595577	42	1780.28	1827.64	1835.77	75.288	31.085	20.914	7.495	3.915	0	0	10.016	22.956	2.342	53.932	8.371	6.251	0	20.291	26.715	0	0	4.203	78.478	0	385.097	50.988	18.3	1.463	24.599	7.151	1885.8	3346.93	5.902	88.931	22.3332	17.3692
1179	595740	40	6389.92	6454.58	7456.81	308.834	80.823	55.762	0	0	0	30.399	7.644	0	6.492	1019.39	1.619	0.718	5.342	27.817	8.217	281.556	5.594	1.217	53.453	1.441	524.995	1.028	3.365	0.177	12.796	46.628	3067.12	5285.03	14.726	53.396	-7.48698	-5.95909
1180	595788	39	2947.1	3162.6	3339.5	114.867	35.519	16.303	0	5.405	1.213	51.366	8.65	3.022	22.141	2010.18	8.147	3.774	0	17.194	4.844	0	0.952	25.227	31.527	2.39	824.143	7.736	0.336	0	10.791	2.84	1626.84	3014.65	80.963	47.678	18.3804	-11.2236
1181	596537	30	1511.97	1432.73	1705.65	56.909	14.812	0.727	0	0	0	1.63	0	7.393	2.157	17.552	1.985	0	0.589	16.084	6.104	0.719	0	0	20.186	0	196.235	7.133	11.521	0	1.494	5.624	1258.25	2196.12	2.418	34.13	-0.95521	17.6932
1182	596601	62	2322.4	2272.16	2526.76	122.177	46.715	34.02	19.325	0	1.839	23.522	33.341	51.85	19.039	145.558	33.74	12.13	3.482	51.831	44.94	5.225	24.937	12.251	101.006	14.008	504.113	56.976	18.98	14.127	39.293	11.933	4101.06	7143.93	16.932	183.745	27.9783	4.83871
1183	596646	41	1186.98	1193.99	1215.96	50.892	22.735	2.959	1.555	0	0	4.534	7.003	18.366	7.157	49.289	1.685	1.243	0	19.109	11.617	5.993	4.644	1.944	29.722	0	173.441	15.707	0	0	17.372	13.783	845.423	1667.77	6.318	46.262	11.7917	14.7212
1184	597066	35	1889.83	1914.95	2118.26	91.475	36.446	13.888	11.451	0	0	5.449	6.307	12.051	7.864	51.037	7.163	4.148	0.541	23.883	29.227	0	10.859	22.923	35.895	4.361	243.885	18.61	14.136	0	35.098	8.843	3021.58	5745.71	25.772	48.649	13.3385	23.0097
1185	597750	42	315.541	419.467	470.215	30.665	15.088	14.304	6.986	0	0	0	5.712	8.627	3.147	20.899	4.618	0.461	0.29	13.801	7.494	0	1.534	7.155	1.247	9.369	130.325	16.403	0	0.401	27.776	3.747	572.306	1109.07	5.544	38.1	-3.55115	20.4048
1186	597846	60	1002.82	1035.7	1045.54	60.987	26.045	12.371	1.878	0	1.687	0	11.649	8.148	18.266	38.825	3.136	4.198	0	23.336	10.798	12.078	1.573	5.935	13.753	0	269.929	6.503	1.882	1.399	14.685	15.786	1402.98	2562.75	33.999	66.055	3.06105	11.2543
1187	598189	51	3956.71	4007.65	4313.93	181.597	47.585	28.62	19.803	0	3.601	0.275	17.835	55.46	23.342	141.76	15.984	16.032	0	44.014	27.19	8.382	10.003	15.229	73.775	2.41	587.79	30.066	16.042	10.64	39.383	18.658	3755.62	6558.22	11.256	160.531	24.173	6.06741
1188	598302	46	1321.8	1386.89	1476.89	56.632	37.527	14.905	15.756	0	0	12.104	11.543	13.535	14.214	41.241	8.681	3.46	0	44.955	7.324	7.691	0.349	1.639	29.701	0.289	194.793	11.983	9.22	0.085	18.204	13.537	1620.62	2948.71	15.311	84.106	11.6922	13.9868
1189	598464	54	1065.11	986.193	1130.24	50.743	8.193	13.923	2.98	1.606	0	3.301	8.382	41.627	32.329	115.984	15.773	4.85	1.748	13.205	9.45	11.795	18.104	8.047	30.231	8.725	187.483	15.475	18.189	8.385	34.839	35	1219.74	1928.71	16.118	10.679	7.82413	9.04419
1190	598515	36	1302.99	1139.1	1339.98	83.508	40.059	4.599	2.365	0	0	0	2.499	15.778	9.578	41.618	16.91	0	1.679	27.413	0	2.298	0	0	56.717	0	297.844	11.931	14.441	0	20.473	57.77	1394.41	2545.67	24.498	29.923	14.9567	15.6818
1191	598569	65	1321.75	1263.83	1451.13	59.144	20.64	4.924	3.186	0.657	0	0	3.959	0	8.341	35.375	0	0	0	10.527	0	0.651	0.438	0	38.625	1.117	167.345	22.23	5.751	0	32.393	7.782	1172.15	1979.31	16.724	39.983	2.66817	28.6947
1192	598583	47	947.376	824.344	1043.93	53.924	37.155	7.679	1.475	4.553	0	0	0	4.511	10.56	33.527	5.902	5.308	0	8.555	7.12	0	0	4.893	41.698	7.361	180.414	20.884	11.103	0	12.105	12.406	1483.32	2641.66	37.037	16.849	3.76174	24.0946
1193	599418	55	2169.67	2189.03	2388.12	110.404	28.869	12.154	16.822	0	0	10.953	2.33	12.327	13.29	95.852	11.74	6.828	2.472	26.818	20.954	6.299	3.568	3.001	31.135	1.755	249.383	23.499	7.094	14.001	26.92	72.996	1885.3	3498.49	28.116	48.484	11.9064	11.4859
1194	599431	29	1085.55	1040.4	1217.03	61.511	23.272	26.574	29.673	0	0	0	6.049	6.076	13.525	61.65	15.872	3.925	0.479	35.343	33.612	2.561	10.837	10.073	95.106	0.176	575.159	20.089	0	0	38.752	166.366	3161.78	5599.25	12.346	29.768	21.5286	21.2873
1195	599662	32	1347.18	1537.98	1689.3	59.554	37.811	10.54	5.594	0	0	0	6.137	38.082	12.385	124.671	12.642	1.384	1.513	21.282	4.998	2.272	7.283	0	20.042	1.985	257.435	12.308	2.004	6.39	20.448	7.263	1788.54	3204.15	27.458	36.167	11.8871	16.8714
1196	600273	66	1368.11	1428.2	1669.04	64.261	25.95	25.741	2.661	0	0	4.586	1.357	27.261	18.419	98.433	19.913	12.8	0	34.175	23.688	5.167	4.103	3.696	12.015	0	213.927	17.258	6.422	7.624	12.799	25.739	2053.46	3789.22	27.051	34.437	10.6263	15.8831
1197	600612	30	1427.6	1350.14	1636.47	42.738	30.153	8.381	2.088	1.819	0	4.632	4.033	13.084	13.523	24.407	7.736	3.479	0.318	12.982	4.21	4.372	0.523	0	21.908	0	165.563	5.337	0	0	16.473	12.807	1557.98	2592.45	8.81	62.462	-3.7728	14.0249
1198	600619	29	945.29	883.408	1017.96	47.166	17.021	7.172	0	0	0	0.46	3.909	15.803	9.379	13.142	3.84	3.035	0.445	12.096	5.582	15.207	0.89	3.214	10.456	0	84.284	7.883	0	0	2.838	2.517	806.895	1379.09	20.573	36.463	-5.59289	10.781
1199	600632	51	1150.51	1110.31	1281.11	104.247	14.714	10.784	13.231	0	0	0	0	12.89	4.193	28.712	11.4	19.713	0	31.29	16.53	2.699	3.142	18.965	45.112	0	360.239	27.75	15.542	12.069	60.749	7.652	2311.17	4105.75	21.566	41.059	14.9247	23.4343
1200	600739	37	2668.46	2707.35	3176.29	134.66	43.032	14.096	3.155	0	1.741	16.437	18.36	23.916	15.054	86.584	9.711	16.286	7.161	70.994	13.368	6.352	0	4.421	89.217	12.801	629.2	81.712	9.999	8.177	36.103	9.864	2643.93	4637.18	14.423	63.578	27.6372	7.28087
1201	600859	57	2426.29	2574.39	2699.51	142.585	29.735	21.183	24.161	0	0	6.173	29.653	29.912	17.701	109.109	14.511	2.844	1.034	46.082	38.485	22.106	14.562	42.384	45.093	11.955	538.766	28.195	8.966	18.711	105.33	236.505	2868.53	5083.39	5.177	126.356	19.3168	1.45605
1202	601289	33	1340.84	1403.91	1629.95	73.4	15.283	8.885	1.906	0	0	0	12.066	14.81	3.9	17.283	2.821	6.582	0	37.81	0	8.969	0	0	26.947	0.552	203.801	12.335	0	0	16.726	11.294	1439.9	2655.94	59.619	41.357	4.33357	15.1324
1203	601837	62	4823.81	4897.68	5451.08	205.25	41.92	40.728	9.789	0	0	22.916	8.331	91.471	23.911	161.023	5.477	21.539	1.772	34.247	12.224	9.779	0	17.4	44.795	1.985	554.278	35.221	6.114	5.047	22.443	191.055	3105.87	5421.17	14.835	94.933	23.6449	5.86547
1204	601994	47	904.248	946.243	924.115	40.665	7.897	11.164	10.768	0.229	0	4.181	1.203	18.006	48.045	28.975	3.039	1.454	0.193	7.525	16.22	0	0.37	0	30.113	0	194.954	19.129	2.326	1.449	27.726	19.521	1107.15	1806.2	22.54	41.893	4.73948	20.2494
1205	602062	37	1888.85	1931.72	2343.11	101.883	24.799	16.299	8.903	0	0	4.028	9.118	46.08	10.817	116.762	13.114	7.287	0.55	18.447	31.525	8.543	11.959	11.425	64.931	6.593	546.171	37.796	3.504	0	48.609	42.538	3982.92	7315.49	33.883	30.553	22.5266	7.10597
1206	602127	45	4259.76	4405.88	4865.1	163.916	44.678	34.199	3.823	0	0	12.844	6.802	26.008	2.8	31.09	0.306	9.577	0	30.445	7.803	16.146	2.111	1.586	22.161	2.144	132.943	18.338	0.444	2.119	6.678	37.619	2148.05	4088.64	9.822	52.55	8.38768	9.51827
1207	602144	30	2430.43	2633.26	2988.99	92.635	32.528	14.347	23.257	0	0	3.502	10.225	33.929	12.597	71.393	3.412	5.711	0.505	34.371	24.854	9.388	3.275	5.053	24.198	0.901	513.498	37.232	9.055	4.374	55.184	172.017	4045.65	6974.65	21.006	64.743	17.5618	8.0368
1208	602322	37	866.773	782.785	846.76	42.63	8.484	6.286	0	0	0	0	3.664	3.05	7.03	20.055	0.595	4.213	0	15.042	2.665	1.969	2.284	0.192	8.384	0	106.472	3.785	0	0	0	1.366	844.199	1368.79	16.361	26.062	-6.14966	24.4813
1209	602355	31	1177.51	1077.91	1211.74	60.767	14.715	19.643	6.777	0	0	26.044	8.848	22.721	0	54.241	0.859	8.285	1.155	19.746	14.668	10.013	13.745	10.5	48.659	0	430.919	27.79	6.991	2.944	42.045	33.151	2025.53	3470.62	37.067	30.493	16.48	9.23824
1210	602412	43	2794.68	2814.78	3184.54	119.446	47.621	18.292	0.112	0	0	32.894	2.179	3.074	2.456	249.545	0	4.414	1.09	17	0	28.333	5.563	25.112	12.061	2.045	470.854	9.438	0	12.313	0.924	47.731	1182.68	2240.09	3.09	2.983	6.62704	-1.123
1211	602466	50	2076.92	2174.8	2358.83	110.866	35.427	20.749	3.924	3.88	0	35.994	16.294	46.584	33.834	284.267	36.065	8.471	9.594	89.496	20.139	11.812	12.462	12.155	71.908	1.688	624.964	50.31	29.067	6.656	30.582	39.697	4696.09	7809.7	44.54	97.519	23.2938	-1.97883
1212	602507	35	3171.14	3144.62	3709.67	121.605	33.275	18.029	13.271	4.801	0	14.072	16.74	16.447	12.192	86.16	20.663	23.561	1.158	51.222	18.07	7.029	0.01	36.948	94.378	0	721.532	49.395	26.213	10.081	61.585	26.212	5568.04	10349.5	20.466	100.898	25.3697	9.22015
1213	602565	62	1649.23	1610.7	1896.07	75.613	38.039	30.526	6.377	0	0	5.047	12.034	9.335	6.397	26.333	11.638	13.098	11.364	20.262	13.008	21.393	9.737	0.902	39.133	0.407	150.787	7.892	0.099	3.667	21.664	2.491	1415.88	2381.99	29.322	55.604	3.45806	10.8561
1214	602777	40	2559.88	2522.42	3060.1	129.175	51.198	26.901	22.601	0	1.062	7.945	21.625	71.007	23.915	198.738	21.925	7.504	5.51	31.369	42.118	10.668	3.669	23.673	52.423	0.686	723.726	39.85	11.456	3.218	127.337	263.557	4342.06	7794.83	16.031	133.32	23.779	-2.27418
1215	602980	45	856.561	852.452	1001.71	50.312	33.586	16.614	16.468	0	0	4.526	7.657	21.829	27.908	73.917	19.187	3.141	1.114	15.52	13.661	3.05	0	4.156	27.977	0	179.46	16.447	19.625	23.254	39.258	8.792	1498.4	2678.41	16.136	55.115	12.1675	16.2047
1216	603099	37	1988.94	2050.09	2139.2	86.365	45.652	5.393	11.391	0	0	6.485	19.255	22.898	13.064	67.48	14.258	10.268	5.955	43.457	39.366	2.806	5.817	16.962	46.31	5.325	397.993	19.749	7.836	4.048	39.396	13.791	2547.22	4592.4	5.702	138.208	19.9946	14.0684
1217	603206	68	1714.95	1750.91	1893.35	89.536	50.82	26.272	18.038	0	0	0.386	5.481	15.473	18.854	56.156	1.204	0.498	5.416	81.35	58.692	0	0	0.037	77.484	1.612	367.297	41.109	10.985	9.482	21.823	23.132	2513.55	4298.32	11.577	59.605	23.5359	18.6636
1218	603584	45	1005.86	929.987	1168.13	52.699	10.868	12.052	5.112	0	1.848	7.764	0.05	6.504	8.587	35.413	2.199	3.204	0.22	23.995	8.05	0	0.823	0.019	38.795	3.127	161.997	11.273	2.478	0	25.391	1.315	1001.23	2114.13	13.428	21.945	7.67519	24.1852
1219	603607	73	3520.36	3047.26	3558.99	335.6	48.188	272.664	20.893	1.019	0	27.316	9.918	36.922	24.511	256.255	25.658	5.305	12.146	60.666	51.856	301.766	11.344	36.454	106.472	0.731	1174.87	54.963	11.396	8.283	80.366	119.105	4563.51	8125.7	63.021	162.116	21.312	-9.61679
1220	603703	43	5742.5	5942.91	6998.14	180.697	59.97	16.976	2.005	1.546	0	41.28	6.099	7.267	0.699	35.9	1.401	2.095	0.612	5.077	4.425	21.4	0.585	0	10.157	1.528	289.497	6.363	0	6.07	10.51	7.833	2167.08	4116.78	3.95	63.435	-2.18854	10.3753
1221	603712	40	1050.07	1203	1197.28	68.646	19.842	9.502	7.786	1.347	0	13.971	6.892	69.629	0	158.018	47.612	15.696	0	42.384	25.595	19.249	0.568	11.482	47.704	8.292	372.637	12.675	0.452	5.815	58.305	25.248	1492.05	2639.57	12.399	81.609	18.6727	-2.37623
1222	603729	64	8592.84	8844.58	10008.2	366.891	91.287	42.762	12.179	1.257	0	7.1	10.079	86.084	14.447	124.331	22.072	13.539	1.983	51.219	27.79	18.288	14.927	21.922	60.113	5.089	767.156	93.611	16.533	18.101	74.131	49.364	5121.92	9703.55	8.632	51.397	26.163	-3.5216
1223	603736	32	1481.5	1364.01	1414.36	73.208	15.851	14.619	7.431	0	0	4.377	6.844	12.696	11.765	33.045	10.721	0	5.715	41.2	30.634	0	1.895	11.258	50.862	1.744	334.119	15.359	6.105	2.109	23.89	6.709	1788.31	2879.07	28.102	39.927	15.0757	22.7292
1224	603784	64	3984.72	4349.94	4575.97	220.146	30.678	22.596	4.013	0	0	56.203	2.825	17.874	3.773	1109.4	3.073	3.098	2.273	13.981	6.659	1167.8	19.578	5.583	42.478	21.513	8768.53	30.395	7.108	10.64	14.936	0	1638.75	2967.48	61.354	86.379	-23.4511	-5.16187
1225	603877	85	1339.19	1370.23	1542.96	45.521	59.549	21.689	0.823	0	0	11.073	5.283	16.68	10.881	101.447	12.386	1.212	0.858	52.565	14.071	28.468	8.392	8.821	59.959	0	158.191	40.006	6.988	14.893	31.006	24.689	1206.64	2057.3	33.575	65.229	16.676	1.52863
1226	603951	48	1472.48	1537.86	1792.47	95.768	17.572	4.647	0	0	0	4.171	1.251	17.543	2.413	56.915	2.818	9.255	4.82	18.316	10.447	0.441	3.174	8.584	35.183	4.501	259.987	31.35	12.974	1.086	5.588	1.104	1468.58	2845.18	80.333	62.729	16.0826	18.6718
1227	604025	45	2875.8	3129.88	3545.74	171.9	25.442	26.469	14.237	4.98	0	3.308	26.755	45.281	29.01	126.83	19.648	24.605	6.107	44.598	41.756	6.115	3.355	31.533	61.974	11.285	550.601	64.569	8.901	12.761	52.605	13.79	3952.43	7019.85	13.511	133.823	26.9563	5.54529
1228	604054	32	1333.71	1451.04	1742.76	48.097	24.89	14.33	10.858	0	0	0.627	9.354	13.963	10.644	67.065	24.939	9.612	2.469	35.394	15.326	0	11.047	13.459	60.106	3.786	375.242	28.567	0	6.713	76.797	351.224	3198.83	6031.15	10.443	41.788	19.3327	20.2994
1229	604132	31	632.443	714.151	806.762	26.831	2.722	7.085	0	0	2.23	14.068	6.976	5.604	22.243	44.148	15.092	0.449	0.95	13.909	22.019	10.716	0.095	4.746	6.29	0	138.463	4.394	1.137	19.177	2.642	22.43	752.772	1426.94	0.902	43.42	-2.33741	10.3617
1230	604733	33	145.201	128.262	122.759	0.574	7.108	7.852	3.22	0	0	32.104	1.054	1.454	0.445	4.511	5.628	0	0	0	0	0	0	0	4.832	0	4.859	0	0	0	0	0	891.774	1562.63	2.053	0	-15.188	23.7064
1231	604794	29	1566.59	1541.83	1811.32	67.184	37.425	2.943	1.189	1.14	0	2.897	6.464	22.896	10.959	47.925	11.985	14.689	0	25.757	18.733	8.531	9.965	6.184	54.412	3.118	371.121	22.296	7.623	4.121	19.305	6.993	2170.92	3727.29	17.571	97.689	16.689	9.51287
1232	604951	38	2343.41	2354.57	2553.91	128.072	19.468	10.226	11.511	0	0	66.574	6.387	162.746	2.866	7.327	9.727	0	0.245	3.069	4.467	335.804	0	3.313	16.098	0	185.463	6.954	0	1.253	5.529	0.064	1088.22	2076.48	26.694	67.497	-8.36636	7.36475
1233	605110	47	3356.9	3226.61	3686.41	124.947	50.319	3.973	1.336	0	3.965	17.805	2.561	10.52	26.269	2863.73	11.723	0	0.728	29.526	17.219	1728.05	0	4.237	31.603	3.742	4884.21	23.969	14.569	0	13.241	1.545	1291.07	2471.57	59.641	71.929	-23.5392	-5.37709
1234	605392	36	2027.45	2122.59	2388.11	71.179	23.104	12.718	4.446	0	0	0	11.641	12.405	1.523	46.434	9.491	2.608	8.31	28.795	35.84	3.675	4.133	4.94	40.428	0.287	349.578	31.73	3.874	11.774	16.461	30.725	2715.03	5233.65	14.881	34.533	13.5616	14.2595
1235	605408	51	1679.23	1716.53	1958.35	83.997	34.237	21.455	6.866	0	1.025	3.854	6.059	9.978	19.043	42.136	12.268	1.624	0.575	30.025	18.969	0	0.412	6.315	19.783	20.217	232.583	11.689	0.412	1.726	19.332	39.884	2190.08	3869.74	19.826	67.559	8.87126	22.3719
1236	605533	31	833.374	910.741	1111.63	49.297	13.113	7.509	1.385	0	0	22.582	8.989	17.366	9.989	34.287	3.3	0	0.761	24.483	8.166	6.655	0	1.927	23.805	0	179.415	16.493	19.295	7.898	63.908	0.725	1085.89	2271.74	15.631	45.652	11.4593	13.2905
1237	605569	30	2583.1	2670.55	3056.49	73.732	29.014	25.524	0.852	0	1.136	46.739	5.863	12.027	15.303	1710.73	9.954	3.456	0	25.117	6.425	0.873	2.755	4.672	8.54	5.559	168.7	0.28	2.257	0	0.735	8.436	1868.3	3516.93	76.514	82.969	0.991155	4.43187
1238	605637	44	1791.9	1719.48	2050.33	81.639	27.376	28.298	26.197	0	0	0	9.476	13.148	4.611	69.837	3.768	3.254	0.063	25.683	9.282	0.223	2.896	20.59	51.824	2.15	320.185	20.527	14.873	1.006	11.854	5.028	2174.37	4058.87	17.746	33.368	15.2833	22.5374
1239	605708	73	2467.08	2533.12	2751.25	107.913	48.524	20.542	33.369	0	0	0	16.559	18.651	20.547	99.824	12.77	3.244	0.321	68.077	38.817	15.575	6.544	35.516	58.773	7.781	669.326	35.125	7.44	4.329	48.813	118.268	4479.11	7832.4	18.636	79.756	22.5499	2.33508
1240	605932	32	2002.41	2051.6	2355.59	78.169	20.123	18.042	1.428	0	3.543	50.972	4.926	0.53	16.38	12.52	10.295	0	0	2.593	4.174	1.175	0	2.964	8.303	0	72.026	6.507	2.454	0.024	3.639	40.822	888.264	1814.99	8.333	97.025	-7.03804	27.0773
1241	606444	31	422.528	395.367	419.716	17.578	13.504	13.75	12.168	0	0	0	0	2.438	7.967	44.03	8.255	14.582	0.814	21.037	14.336	0	0	93.023	16.151	0	216.449	17.924	0.815	6.94	180.739	166.533	959.07	1736.56	11.161	14.032	3.91952	27.3857
1242	606456	42	860.214	807.862	794.682	30.224	11.018	14.726	329.179	0	0	0	5.206	4.823	4.095	24.127	0.536	1.443	0	3.554	0.888	0	0	0	0.043	0	103.227	5.612	0	0	0.568	1.16	414.668	744.297	6.719	23.049	-10.2751	19.846
1243	606793	53	1334.24	1237.85	1461.92	55.309	39.573	11.854	6.995	0	4.13	0	5.634	32.434	2.119	21.585	0	0	0.698	41.348	2.947	0	0	3.529	17.598	0.571	252.636	20.997	0	0	1.4	0.209	1094.48	1935.56	36.648	100.648	10.3158	19.6037
1244	606838	38	1831.47	1876.49	2207.1	114.23	53.929	19.661	3.007	0	0	0	0.099	10.124	22.069	31.382	12.876	1.469	0	24.239	11.355	1.971	2.39	6.311	48.509	2.574	323.59	46.704	2.601	0.102	31.659	68.488	1972.01	3513.56	13.516	34.522	18.5548	21.9414
1245	606933	31	3044.67	2782.74	3429.61	126.162	34.699	17.876	4.631	0	0	3.009	4.785	17.728	2.453	698.99	0	3.358	0	6.819	2.728	26.38	0	3.062	0	0	80.369	0	0	0	5.101	3.981	1778.09	2724.5	0	58.256	-2.94195	2.94965
1246	607055	75	5368.54	5495.16	5822.21	199.037	72.422	32.487	3.126	0.277	0	32.818	10.194	962.666	12.007	37.902	3.032	17.608	1.671	19.838	6.719	49.952	1.995	0	28.871	2.223	359.166	21.978	0	3.303	16.177	8.305	1223.22	2247.93	24.513	74.915	-14.1593	5.68033
1247	607117	66	2063.42	2036.1	2300.78	110.528	70.821	25.212	14.26	0	0	15.35	41.581	122.002	63.975	385.368	50.465	21.55	8.2	98.546	28.943	46.861	22.854	47.817	74.693	6.077	431.205	32.517	33.921	19.458	52.129	142.354	1967.58	3687.32	3.842	94.297	23.7717	-7.11509
1248	607273	31	1589.24	1722.72	1961.2	107.775	22.421	13.191	0.687	0	0	0	12.333	34.495	24.504	115.413	15.246	13.219	0	22.626	19.03	32.361	15.923	20.989	59.901	3.727	352.36	43.536	7.232	14.791	24.71	64.118	1719.34	3217.52	1.974	93.717	17.3872	-0.148876
1249	607667	46	1784.98	1740.34	1699.79	96.196	30.178	13.256	6.794	0	0	0	28.835	22.76	3.174	81.26	10.087	5.571	4.314	41.786	9.576	7.131	0	5.856	75.515	0	338.571	23.099	0	1.147	5.258	17.61	1965.09	3551.8	53.321	42.722	21.335	9.85485
1250	608064	36	2194.6	2294.75	2517.78	106.177	28.051	11.031	2.256	0.432	1.077	9.398	10.142	27.304	13.941	72.645	8.425	1.823	0	13.316	12.96	0	0.122	5.273	15.403	0	254.131	29.585	7.408	7.445	25.296	113.026	2503.51	4629.55	23.371	62.294	12.9456	18.0167
1251	608080	42	1499.67	1505.73	1650.97	88.789	27.592	22.046	4.911	0	0	0	5.889	6.207	2.77	44.794	0	4.48	0	19.568	15.636	0	2.128	2.353	18.968	4.105	261.943	19.801	7.26	0.715	6.235	17.26	1631.41	3010.38	26.063	51.979	9.25796	24.1129
1252	608097	42	1706.24	1606.61	1860.86	92.771	22.758	22.48	12.943	0	0.141	0	0	13.864	0	45.433	5.88	1.677	1.015	28.485	3.753	0	0	0	31.6	12.314	249.07	13.085	4.316	0.804	22.08	7.631	1422.89	2666.82	18.489	23.456	12.9396	19.8347
1253	608153	49	1268.47	1136.78	1299.12	51.312	33.008	16.209	8.377	0	0	17.681	10.214	8.242	7.872	54.735	9.728	8.155	1.376	57.639	32.984	8.002	0	2.736	38.981	16.934	453.529	17.074	5.512	4.005	7.594	48.144	2470.03	4979.27	10.596	19.885	18.722	7.09416
1254	608247	48	1658.84	1608.55	1744.77	89.498	21.085	16.268	1.341	0	0	0	9.294	13.876	4.947	29.741	10.578	4.56	0	23.289	11.076	42.855	9.903	0	30.16	0	223.807	15.162	0	0	21.793	5.435	1215.86	2117.93	67.089	29.069	8.76976	7.26397
1255	608367	40	1391.26	1546.49	1528.83	82.367	36.27	7.668	15.314	0	0	2.481	19.618	27.269	12.173	119.024	17.723	7.499	0	31.317	29.652	3.356	3.21	10.354	47.033	5.983	314.96	19.329	4.95	7.694	22.366	32.285	1379.11	2614.68	19.123	28.091	17.1472	11.905
1256	608780	50	812.857	758.706	894.638	67.01	0	9.337	1288.69	0	0	23.317	2.693	5.558	0	9.327	2.03	0	2.098	0	3.565	2.389	2.481	6.986	10.23	0	29.441	4.219	4.553	3.712	5.367	10.942	1056.07	1662.74	69.586	129.167	-11.4804	25.9943
1257	608917	35	1509.04	1430.52	1608.2	60.192	23.097	14.059	12.59	1.551	0	17.2	13.961	35.265	40.519	169.13	44.854	10.586	0	19.336	24.866	29.629	7.93	34.053	60.199	5.144	361.53	21.85	10.636	26.081	28.043	41.528	3075.94	5564.89	25.829	60.283	17.1336	-0.699781
1258	608946	32	2965.13	3011.71	3267.49	173.862	32.567	27.404	32.931	0	0	0.64	12.856	22.756	27.681	174.325	26.583	10.649	0	39.681	18.868	8.144	7.738	34.716	87.44	13.526	1087.48	40.753	15.793	12.364	94.142	124.136	5642	9627.24	16.473	44.918	23.6141	1.74642
1259	609032	52	1928.42	2058.32	2336.87	109.609	32.871	13.864	1.229	0	0	48.238	2.831	27.839	10.236	34.06	4.219	2.48	0.981	15.436	13.96	30.259	4.057	0	18.849	1.161	284.759	26.531	4.48	4.066	9.035	11.349	2175.56	3945.55	45.536	72.897	9.36394	8.36067
1260	609296	46	4501.63	4826.6	5241.27	195.794	47.677	31.194	10.524	0	0	9.734	13.649	25.778	12.828	81.443	0	10.594	0	48.494	23.436	26.052	12.894	2.117	30.457	6.877	580.693	63.935	2.335	7.744	24.919	6.096	4069.18	7258.52	62.855	113.32	17.4588	1.38243
1261	609339	32	2346.61	2290.78	2758.93	150.048	35.873	13.168	5.531	0	0	1.174	2.499	37.233	16.072	21.613	19.795	11.525	1.799	12.963	13.916	6.196	0	15.171	10.05	1.68	177.577	6.726	7.184	12.765	0.498	50.042	1192.85	2295.1	10.136	29.014	6.00007	11.468
1262	609422	62	1623.62	1641.83	1899.56	73.158	33.922	12.92	10.736	0	0	0	16.527	49.249	29.911	81.573	25.299	1.003	7.214	30.705	21.369	13.463	3.561	25.703	57.47	5.535	274.005	42.573	7.771	4.925	42.29	39.508	2570.99	4544.6	38.389	80.009	21.5775	7.17402
1263	609424	40	1275.29	1364.26	1572.32	85.603	35.405	19.563	15.895	0.887	0	20.953	30.99	31.661	25.135	128.105	13.549	6.681	3.152	35.485	18.971	14.854	16.7	13.792	25.763	3.782	408.107	49.101	7.099	6.158	54.133	54.046	2231.76	4034.07	36.901	51.578	18.0162	3.42658
1264	609481	40	2438.86	2514.66	2560.48	127.596	23.986	17.528	2.604	0	0	38.437	0	217.592	4.089	27.658	724.467	9.985	0	6.972	10.095	0	0.975	0	11.441	6.559	38.525	0	0	3.986	3.201	0	917.332	1832.4	18.18	23.72	-20.168	16.5817
1265	609525	35	3442.34	3234.73	3680.27	196.532	42.635	10.335	0	0	2.365	5.754	0	711.866	0.903	10.292	0	10.779	1.762	3.673	6.506	34.576	2.248	7.508	14.645	0	161.854	6.112	0.389	0	7.787	9.842	905.268	1626.58	11.604	47.736	-19.5467	6.39474
1266	609539	34	2544.44	2540.61	2962.93	125.044	31.92	12.63	40.607	0	6.391	36.214	14.701	88.406	27.192	327.38	47.113	48.036	6.084	33.54	17.056	30.268	14.845	30.841	94.985	8.196	652.825	32.16	41.349	30.8	124.584	426.37	4841.05	9359.24	9.897	70.352	22.5522	-5.33834
1267	609599	39	2576.42	2671.96	2841.24	105.608	26.151	15.849	0	3.332	0.374	31.058	1.97	0	2.705	238.034	14.854	0	0	28.036	11.167	34.671	3.86	2.957	6.581	0	196.107	0	1.87	0	18.053	21.293	1406.02	2586.02	12.481	36.382	-0.34802	1.46144
1268	609698	39	2315.18	2375.28	2917.26	97.94	46.538	25.828	27.478	1.197	0	9.028	16.395	54.663	39.935	305.631	19.552	3.969	0	63.158	31.459	20.151	15.27	28.269	78.861	14.216	574.366	40.905	13.053	7.447	128.798	260.05	4487.5	8251.06	30.44	86.305	22.862	-3.68835
1269	609966	75	4322.66	4303.02	4602.38	177.71	47.436	51.825	56.477	0	0	12.111	16.742	52.695	19.243	243.183	29.954	4.413	1.933	135.36	7.858	7.479	11.966	10.563	199.384	5.838	1422.09	112.065	10.054	16.566	15.831	11.008	6549.92	11554.3	50.009	40.691	30.5033	-4.90829
1270	610035	41	938.096	1018.94	1025.13	41.716	23.859	4.993	1.438	6.93	0	13.28	0	1.796	9.448	22.127	2.339	0	0.411	18.849	3.024	0	6.892	0	14.187	3.771	98.565	13.232	0	7.296	0	2.598	700.14	1326.57	15.141	11.108	0.160305	29.1242
1271	610042	60	583.603	648.322	794.478	42.701	21.285	0	3.688	0	0	4.456	0.564	0	3	15.911	4.356	0	3.044	12.385	9.032	3.313	0	1.592	1.471	0	107.35	7.455	0	0	6.152	8.277	834.712	1639.92	1.52	3.81	-10.3056	22.179
1272	610289	52	766.717	796.687	880.244	25.816	12.534	14.875	8.066	0	1.416	0	7.355	8.613	8.37	45.721	10.798	0	0	16.926	5.897	5.508	6.072	5.19	7.249	0	119.594	27.095	0.366	0	2.23	9.441	1020.32	1828.47	5.329	70.364	2.68878	16.2885
1273	610290	31	1122.96	1148.16	1236.35	44.513	19.782	6.477	4.551	0.819	0	5.213	4.023	22.909	4.874	31.105	7.439	15.847	2.523	21.884	0.27	11.058	3.524	1.232	12.059	1.584	203.634	9.982	0	4.638	20.381	3.902	1240.35	2168.9	32.036	34.924	5.58744	10.8414
1274	610328	46	2237.01	2558.54	2907.67	128.925	40	21.198	9.425	0	0	4.143	17.597	15.238	17.084	81.421	9.953	3.959	5.239	54.904	5.398	4.829	0.653	23.126	62.845	6.502	508.855	21.482	3.931	7.645	51.289	35.131	3455.92	6507.79	19.74	64.094	19.6073	6.24568
1275	610731	49	1531.11	1418.53	1839.43	93.498	21.368	20.161	11.381	0.062	0	0	3.853	27.045	15.589	110.315	14.468	3.759	7.941	34.944	20.065	9.376	0.81	13.28	28.84	1.218	371.009	20.988	17.31	0	23.842	29.526	2393.82	4134.31	35.19	61.595	15.587	4.733
1276	610837	34	1824.93	1792.07	2166.06	119.467	9.801	11.903	14.132	0	0	0.909	9.067	18.409	8.065	35.066	7.249	2.317	0	29.282	7.24	33.983	0	7.69	23.132	3.347	425.371	20.604	0.862	0	1.513	3.815	1570.58	2708.14	8.252	22.91	9.95114	6.10912
1277	610839	35	4163.42	4296.76	4653.44	190.003	35.482	16.392	13.032	0	0	23.756	31.735	282.665	107.91	1260.03	53.898	23.725	4.095	61.482	34.314	54.16	6.627	50.389	59.319	10.336	1098.8	27.42	28.996	47.852	112.571	633.78	5537.84	10258	20.035	115.645	24.7501	-9.47134
1278	610885	29	696.915	747.456	911.437	21.928	8.084	13.028	2.082	0	0	0	9.874	13.635	1.421	23.095	25.693	10.356	0	10.939	5.714	5.125	2.701	4.818	19.841	5.14	84.071	1.265	0.534	0.873	30.662	5.775	1015.61	1839.84	17.366	46.102	-5.51835	13.1756
1279	610973	46	809.499	848.52	996.584	62.407	9.25	10.585	0.45	0	0	0.196	0	7	3.198	18.321	2.467	0	0	2.416	13.369	29.631	0	0	15.072	0	165.702	8.264	5.757	0	21.716	6.967	631.862	1335.29	26.386	21.75	-4.25654	9.16108
1280	611008	33	3467.03	3502.48	3982	127.737	35.609	24.894	0	0	0	16.523	0.959	263.114	1.367	13.559	0.691	3.305	0	0.659	6.007	0.744	1.419	7.742	24.147	2.065	203.557	1.854	1.708	1.243	0.838	15.04	1242.45	2105.06	10.514	11.324	-24.8392	12.7406
1281	611045	30	2431.05	2659.85	3046	110.752	46.866	19.744	9.629	0.485	0	4.231	6.14	54.663	17.463	268.372	30.114	1.919	4.073	33.845	23.229	17.229	9.39	16.137	118.076	0	653.073	33.588	21.838	16.91	45.504	43.324	4527.89	8329.55	6.054	20.84	22.6762	-2.99728
1282	611060	40	1863.58	1950.02	2108.29	92.526	33.282	17.551	14.072	0	0	0	19.018	101.472	61.461	475.38	54.188	13.212	4.11	27.885	44.836	27.623	18.994	28.758	80.027	12.638	613.263	28.196	31.347	39.766	89.409	308.412	4795.07	8583.33	24.718	61.504	22.8778	-6.17986
1283	611137	74	1060.92	1019.85	1109.76	63.17	30.255	13.896	1.594	0	0	9.037	3.225	10.93	0	36.623	2.839	4.349	0	31.185	13.01	5.677	0	0.22	33.34	0	94.592	18.23	4.033	2.768	7.395	12.44	1159.54	2011.11	37.525	11.588	4.03037	16.158
1284	611168	45	2064.16	2066.56	2427.89	90.289	27.162	19.285	14.139	1.75	0	14.159	4.955	15.934	16.041	57.914	5.782	2.44	0.56	21.545	16.832	0	0	1.276	65.534	0	254.341	24.194	23.134	7.813	55.018	24.124	2348.25	4293.59	42.496	52.049	18.1281	19.769
1285	611287	49	2164.86	2215.69	2349.02	138.983	53.182	14.862	4.561	0	0	2.892	4.271	26.686	7.896	14.959	9.571	12.162	3.937	22.884	16.988	128.213	2.898	0	75.364	0	295.066	17.247	1.542	3.011	26.619	22.457	2094.97	3816.58	61.135	46.167	13.51	0.651757
1286	611366	35	1693.19	1520.49	1834.39	78.643	62.218	15.795	5.693	1.275	0.292	0	30.157	40.344	35.519	82.06	19.45	9.589	5.272	14.641	12.634	11.566	0	23.677	27.955	2.29	352.914	27.04	0.027	0.401	22.871	12.659	2009.52	3607.98	22.757	76.654	15.0778	9.23899
1287	611404	34	701.046	640.726	801.402	40.947	12.179	2.28	1.079	2.681	0	3.769	6.018	16.255	4.275	15.194	0	0	0	0	0	0	0.59	0	11.365	2.33	97.163	4.561	0	0	4.187	0	559.408	1044.46	9.851	4.128	-8.27662	17.7174
1288	611450	47	3590.24	3452.06	3949.13	174.227	33.52	25.436	8.4	0	0	0	3.278	40.194	21.122	116.147	13.495	16.294	0	53.196	13.523	11.02	0	16.381	100.332	10.176	626.619	75.537	10.487	0.786	75.52	1.296	4394.06	8426.87	37.153	59.773	26.746	-0.113274
1289	611482	29	1621.22	1639.72	2078.83	81.659	26.978	11.314	4.642	0	0	0	11.929	5.214	5.541	41.104	1.677	6.923	1.612	26.214	6.576	0	0.105	0	25.696	9.684	256.314	31.855	0.386	4.44	27.686	3.075	2229.25	4246.93	2.163	56.216	10.7918	25.1838
1290	611576	53	1824.4	2006.28	2078.17	82.249	38.563	12.33	1.893	0	0.112	0	11.046	19.02	13.026	59.362	11.366	14.391	1.298	32.039	33.603	4.641	7.548	35.684	27.22	5.487	401.966	27.691	12.402	6.394	25.98	28.517	2181.87	4031.28	16.957	122.125	14.2419	13.9221
1291	611585	29	914.318	983.237	958.921	36.521	6.676	5.529	0.482	1.483	0	0	9.74	5.388	8.821	52.278	13.345	12.379	0	26.703	23.055	3.188	1.808	13.144	20.932	0	180.217	1.551	9.74	0.166	18.166	15.494	1033.03	2010.47	5.088	43.827	1.93742	13.2509
1292	611637	38	2520.32	2556.75	2746.24	105.438	44.864	11.453	3.938	6.279	0	0	13.18	33.007	15.036	77.489	25.59	8.328	0	26.588	13.275	9.64	6.927	4.202	102.923	10.756	405.733	33.376	14.392	5.761	39.209	39.463	3314.78	5782.08	29.454	67.859	22.2396	7.85621
1293	611639	58	2817.49	2686.77	3111.91	159.967	40.424	41.128	8.093	0	0	7.511	19.845	51.255	10.512	122.509	30.196	11.064	1.688	49.477	50.497	1.016	0	51.388	79.53	4.64	464.055	14.883	5.638	6.82	131.83	201.343	3831.7	7171.42	42.826	102.566	24.8139	13.7797
1294	611961	41	1163.2	1141.65	1259.82	88.146	18.118	16.424	16.073	0	0	18.487	5.935	17.239	2.793	37.932	15.149	2.462	0	6.486	11.747	7.471	0	23.725	18.084	0.999	274.058	12.647	6.093	7.481	50.099	525.364	1528.19	2902.03	28.262	57.269	6.13089	13.6322
1295	611985	44	2828.12	2828.43	3188.57	136.358	24.679	17.152	0	1.501	2.249	48.787	0	3.44	70.413	9.16	6.865	4.216	0.564	3.216	5.63	3.688	41.616	0	12.468	1.061	155.107	4.581	0	0	4.368	32.459	1691.43	3032.25	8.627	54.397	-9.20543	28.1181
1296	612152	44	1601.63	1425.16	1812.16	81.914	25.622	13.9	9.822	0	0	3.172	8.908	7.912	9.531	43.571	1.142	1.476	0	10.792	13.863	0	1.598	3.714	35.628	0	279.585	22.168	9.225	5.45	14.33	27.946	1671.62	2716.69	26.986	77.658	10.8831	24.1251
1297	612154	51	384.614	474.435	529.102	37.724	10.465	10.018	10.569	0	0	0	4.957	7.522	2.948	35.288	7.13	8.292	0	9.693	2.073	0.157	0	8.6	0	2.294	77.132	1.721	0	4.924	3.287	0	547.149	1164.18	1.001	15.446	-10.323	19.3102
1298	612355	36	688.651	750.787	836.2	26.914	19.947	0.002	0	0.9	0	3.04	4.475	3.78	3.956	23.331	9.896	3.822	1.883	11.544	2.593	0.966	0	11.684	22.863	1.179	104.629	5.377	4.641	3.212	9.016	28.699	868.249	1513	23.258	82.678	-3.07443	28.6605
1299	612365	38	3008.87	3213.56	3471.47	156.661	33.355	10.062	5.116	0	0	1.135	22.664	12.887	9.892	54.769	5.62	4.493	3.031	33.562	7.45	29.512	11.329	11.02	58.098	11.671	514.326	38.893	12.245	6.649	24.362	10.585	3869.62	7050.26	33.074	64.873	15.5822	1.89759
1300	612416	37	2461.91	2486.53	2704.04	89.411	34.026	5.598	5.654	0.433	0	0	0	32.113	13.446	93.693	8.591	14.038	0	51.18	23.783	4.75	2.679	1.349	81.993	11.087	285.781	33.463	2.619	8.001	25.3	1.625	1692.45	3073.94	56.943	34.947	22.9087	10.2963
1301	612423	33	1196.27	1243.01	1398.57	58.078	11.765	11.372	8.586	0	0.998	9.23	32.74	54.139	36.904	184.061	29.15	19.434	0	40.557	41.589	19.795	8.691	18.833	17.061	1.09	302.88	11.764	22.694	23.745	46.378	15.62	2178.74	4035.02	23.047	82.19	17.0771	-2.69809
1302	612614	28	1698.86	1749.39	2131.35	133.995	36.812	25.514	9.852	0	0	4.987	18.969	48.132	25.528	372.93	22.39	19.686	5.037	18.002	16.028	16.698	0.056	6.983	78.373	17.734	522.939	38.865	13.236	7.1	64.978	275.751	4259.38	7697.52	39.437	16.52	20.9523	-2.85299
1303	612699	65	3179.45	3138.2	3567.87	173.583	49.812	31.435	22.827	1.3	0	27.889	12.179	45.663	25.848	144.003	57.877	5.087	1.697	56.601	36.678	12.917	11.784	18.268	97.153	3.344	707.686	47.616	9.366	0.487	70.449	62.855	4841.99	8195.85	46.014	150.982	26.443	-0.970802
1304	612743	41	2473.88	2484.61	2913.57	98.621	57.713	15.383	8.852	0	1.252	0	5.831	44.772	20.783	59.943	7.525	17.166	0	33.641	28.516	0.243	2.214	16.458	70.576	1.588	453.94	49.191	4.134	12.658	61.055	27.132	3298.55	5699.26	20.346	60.103	24.3253	14.7479
1305	612772	50	1929.8	2210.55	2350.31	72.825	35.147	12.387	0.146	5.686	0	0	8.672	18.685	6.225	53.496	7.54	4.232	3.13	39.21	13.651	0	0.749	3.676	36.417	3.481	280.665	23.592	10.325	2.014	22.899	15.027	2133.65	3709.83	18.841	80.96	17.2071	20.1286
1306	612906	48	2923.67	2945.05	3464.42	189.395	38.607	7.801	2.889	0	0	49.882	5.218	0.781	27.308	37.795	4.005	0.926	3.742	13.059	9.605	1.415	56.678	4.507	14.604	10.993	130.324	6.893	0	1.616	8.36	73.369	1442.31	2608.74	17.671	34.519	-1.61275	26.7644
1307	613065	79	7212.48	7416.74	8543.66	342.684	82.503	33.263	0	0	0	13.089	6.739	1158.63	4.972	30.938	10.653	5.625	1.815	39.581	6.97	26.685	2.846	3.3	11.476	2.544	187.305	9.379	0	0	13.459	38.323	2939.6	5262.78	11.497	45.707	-13.5556	7.70594
1308	613214	55	1405.85	1557.48	1682.3	88.446	46.589	8.526	19.867	0	0	0	5.23	32.773	18.608	62.388	11.348	4.992	3.338	27.103	19.689	2.603	7.81	14.768	48.057	10.594	291.158	28.717	6.707	1.378	55.848	64.929	2137.88	3377	26.575	47.16	19.2741	14.8958
1309	613288	53	2827.06	2914.31	3147.97	131.976	46.731	23.787	0	8.136	0	20.097	0	1.392	2.184	407.645	2.838	1.655	0.916	2.313	0	74.514	0.651	2.236	4.992	25.018	1292.95	5.676	0	0	5.835	0	1380.54	2549.96	15.643	71.318	-3.09385	-4.61635
1310	613356	45	2310.51	2436.42	2616.94	118.543	27.224	31.992	31.108	0	0	0.539	10.938	19.215	21.991	117.386	26.217	9.803	0	62.542	28.948	9.686	4.064	16.304	48.223	18.355	850.73	67.279	0	15.394	40.156	165.191	2864.78	5303.83	18.145	105.455	23.0709	3.15883
1311	613382	45	5716.48	6037.27	6772.51	271.601	112.304	14.207	2.358	2.035	0	35.772	2.828	567.654	12.276	17.885	3.56	8.869	0	84.217	19.607	4.053	11.727	11.524	71.918	2.442	514.169	22.437	0	8.83	46.676	13.255	3295.04	6194.76	12.061	71.225	-11.6553	9.505
1312	613461	42	1496.93	1507.05	1643.48	71.26	24.382	0.645	12.583	0.957	0	5.586	22.273	38.851	23.259	109.703	24.059	0	3.202	13.558	28.155	13.84	9.287	4.759	42.3	0	194.393	11.468	5.375	11.205	33.445	20.971	2032.25	4066.05	2.285	62.137	7.77062	8.68436
1313	613617	46	6244.56	6136.7	7164.21	270.577	44.888	31.431	1.86	0	0.803	36.168	4.605	91.472	41.885	284.004	40.77	14.562	8.111	39.641	38.789	33.413	12.374	19.712	62.421	9.5	796.91	30.513	13.882	32.838	25.794	245.092	4578.08	8689.51	59.405	51.621	21.9076	-5.15588
1314	613680	46	2184.47	2151.06	2397.23	114.363	59.976	18.751	2.917	0	3.998	30.986	1.053	0.413	6.142	33.068	1.078	1.392	3.992	4.776	1.695	0	33.25	0.87	13.426	2.127	111.242	3.338	0	0.435	8.985	0.642	1386.73	2108.69	4.882	93.568	-4.70847	26.3013
1315	613717	41	1982.93	1863.75	2220.72	85.328	37.199	12.216	25.118	0	0	10.859	22.772	46.476	10.82	188.373	34.061	8.962	8.585	66.681	36.388	8.007	0	6.704	45.234	8.979	550.08	35.184	16.693	19.54	31.456	50.97	2404.72	4093.95	26.766	22.962	22.2275	0.197514
1316	613741	37	1201.96	1194.02	1351.3	54.036	38.773	11.804	3.087	0	0	4.279	10.572	10.447	9.738	48.872	6.468	17.381	0	42.803	13.804	22.895	3.713	6.741	33.641	4.586	232.74	2.123	2.186	5.599	5.348	7.409	1550.82	2691.18	37.773	27.504	8.58423	4.75063
1317	613745	32	4104.04	4123.27	5015.78	118.209	47.159	19.83	1.53	1.656	0	19.099	0	6.073	2.193	792.739	8.455	0	0	15.217	0	10.922	1.43	2.369	36.172	1.117	223.446	0.195	0	0.179	0	20.652	1845.59	2902.5	5.906	66.243	9.48827	-1.40474
1318	613836	64	2481.06	2375.81	2496.64	168.132	37.831	39.675	6.44	0	0	3.353	23.356	28.18	22.527	118.749	27.725	22.415	0	42.286	19.815	6.689	4.127	33.739	49.517	4.506	428.61	31.265	13.658	6.269	42.121	34.942	3396.99	5772.21	32.652	156.671	19.8823	4.2741
1319	613922	81	1744.87	1712.96	1935.61	109.144	39.914	6.488	26.051	0	28.714	25.89	22.46	35.373	2.869	77.022	17.909	2.739	1.096	31.882	17.564	4.03	3.923	25.007	31.827	0	270.059	46.733	11.203	10.652	105.346	226.987	1706.31	3402.88	34.235	445.474	18.9564	12.2992
1320	614175	47	1515.67	1597.61	1710.41	76.528	9.453	16.451	17.542	0	0.553	1.877	12.781	43.43	6.758	107.673	35.217	5.442	1.721	33.06	30.267	18.937	8.298	25.243	37.132	17.399	395.77	18.719	16.785	10.864	72.854	31.839	2833.19	4983.09	20.894	49.757	14.6328	3.60994
1321	614208	89	3123.47	3242.2	3335.49	187.275	50.946	30.764	20.629	7.1	0	9.342	8.151	69.172	13.162	133.275	27.155	8.281	0	54.04	40.016	7.679	11.774	19.328	52.533	14.524	665.018	51.601	20.146	23.603	42.29	82.007	3752.26	6407.34	36.248	36.033	24.5897	6.16596
1322	614212	39	1950.61	1990.33	2245.36	107.089	34.017	11.41	10.645	0	1.996	8.711	10.043	33.575	10.295	59.656	18.734	5.455	4.714	32.718	12.991	5.878	10.176	0	40.701	7.155	364.132	38.688	18.067	5.008	34.585	23.675	3738.52	6252.54	23.867	57.52	19.0539	11.625
1323	614250	34	4276.04	4399.08	5034.35	174.748	49.234	19.334	1.175	0	0	40.198	10.476	11.341	6.245	368.692	4.381	13.207	1.469	22.908	11.295	31.26	0.46	0	4.213	4.104	1093.02	6.866	4.629	0.529	5.889	6.576	2082.83	4203.65	12.874	116.733	6.83122	-6.27281
1324	614274	70	2737.74	2662.87	3092.67	327.778	69.436	175.977	13.78	0	0	3.959	21.002	18.12	13.784	116.966	23.96	12.361	4.302	62.692	18.757	5.198	10.175	20.728	89.14	0.226	886.251	45.195	21.21	0	57.958	26.362	5133.43	9236.98	15.261	136.937	27.5695	8.50186
1325	614575	31	1850.29	1859.11	2166.49	64.691	21.701	8.498	0	1.938	0	56.182	9.837	6.91	17.936	3420.26	9.873	1.975	0	25.527	3.55	79.366	0	1.081	22.671	74.191	13432	163.056	5.955	0.634	0	0	1345.32	2269.21	37.57	45.619	-29.8952	-9.13404
1326	614588	86	2148.2	2097.17	2513.11	117.418	49.314	24.695	17.346	0	0	10.527	22.242	23.744	29.75	103.252	22.113	3.38	4.095	28.621	22.507	0	8.603	3.4	60.017	5.032	416.291	20.468	15.595	10.556	116.945	27.556	2567.91	4220.92	17.118	92.741	21.6781	15.9862
1327	614599	47	1620.22	1695.61	1694.39	68.42	25.109	24.22	1.948	1.116	5.776	1.716	6.682	35.736	11.264	146.58	15.373	12.322	5.65	12.199	4.666	31.935	3.251	2.062	56.705	9.892	278.161	10.664	6.891	2.822	7.756	16.375	1424.65	2712.21	50.227	112.783	13.2963	3.22349
1328	614639	71	1889.61	1569.71	1689.81	70.399	38.007	26.475	18.05	0	0	13.315	15.235	64.148	33.867	179.03	26.557	27.008	2.64	57	30.679	18.79	0	28.239	44.888	0	437.881	45.624	24.836	11.406	106.638	151.126	2903.74	5019.25	35.689	82.694	22.044	-2.28063
1329	614691	36	2691.24	2995.45	3129.55	126.885	36.688	12.981	19.596	0	0	0	7.235	27.55	12.14	120.494	10.259	23.4	1.507	32.621	55.537	14.906	9.038	41.473	53.825	4.368	653.331	33.779	15.4	7.958	52.828	40.759	4782.63	8223.96	16.897	59.881	20.3085	1.94694
1330	614750	34	847.845	929.142	998.993	64.94	16.072	13.164	0	0	0	0	1.421	11.911	7.649	28.04	2.884	3.185	0.601	2.867	17.501	3.503	0	0	33.077	0	88.696	3.307	4.526	0	24.523	8.438	784.314	1507.33	24.358	35.546	-4.59667	14.3883
1331	614758	71	3363.61	3246.73	3699.59	139.914	61.017	30.155	10.453	0	0	15.061	11.223	70.682	21.886	114.592	2.01	11.221	0	37.541	27.674	21.039	5.122	3.63	55.57	1.195	480.969	46.953	8.122	9.214	27.15	10.684	2925.38	5524.96	56.792	111.737	18.7117	-0.735505
1332	614858	36	3225.16	3628.24	3863.52	131.903	40.729	24.87	13.266	0	0	13.668	24.443	202.147	128.076	663.083	63.025	54.82	5.631	67.108	57.189	34.18	23.593	100.253	91.825	25.756	1258.04	51.818	23.032	72.981	197.277	706.79	5926	11366.8	17.269	44.183	25.0354	-8.80636
1333	614918	79	1723.78	1752.18	1845.65	101.37	28.354	12.698	11.175	6.17	2.784	56.078	16.468	14.978	0	22.192	4.774	14.422	0	8.338	5.56	3.366	0	2.053	17.879	0.293	171.937	8.908	7.424	0.847	11.204	9.291	1629.63	2869.79	44.959	90.914	-3.26373	14.3018
1334	614930	75	2313.8	2479.07	2810.11	126.535	60.87	31.802	40.708	3.798	2.586	30.053	20.209	71.883	48.526	214.495	26.954	13.229	0	59.569	28.78	16.438	15.741	30.009	107.466	5.054	758.226	73.514	20.932	11.803	52.928	56.9	5550.1	9916.23	8.502	112.668	26.9123	-4.38675
1335	615007	57	2194.73	2090.5	2558.19	124.946	40.571	28.033	8.518	0	1.309	3.54	10.905	44.695	15.995	103.706	411.961	16.014	0.643	32.571	13.054	2.466	4.77	79.914	93.692	4.756	512.402	25.985	11.803	4.389	102.102	164.111	3326.82	5930.33	25.543	43.171	23.9472	13.1573
1336	615014	37	1407.05	1434.44	1662.39	69.737	11.664	8.779	7.957	9.264	1.03	45.423	1.692	9.852	4.518	361.591	5.264	1.882	0	12.019	0	2.954	0.259	0	13.131	16.861	1502.54	6.484	4.901	1.144	6.117	1.862	1157.31	2213.38	53.828	111.89	12.6713	-3.46631
1337	615033	37	1356.85	1332.9	1507.39	69.172	34.523	14.001	6.34	0	0	0	0	16.535	8.084	55.865	5.282	3.515	4.239	23.747	15.525	6.139	1.782	8.303	63.515	1.61	170.099	8.529	6.826	2.133	7.173	11.55	1756.06	3211.85	27.903	35.768	13.3168	11.9904
1338	615111	48	3010.74	3336.28	3656.83	174.233	52.185	17.463	12.592	0	0	7.266	14.196	39.807	34.018	174.354	30.284	13.232	3.595	36.834	29.955	20.66	22.554	34.293	54.335	9.077	621.5	53.436	26.705	17.914	69.911	383.735	4512.45	8441.12	27.532	100.249	21.636	-1.19341
1339	615211	54	5122.11	5173.37	6099.72	187.19	44.45	40.013	4.731	3.346	0	21.377	3.493	49.424	5.759	514.085	4.903	2.56	0.714	11.491	6.623	2.697	3.028	5.423	25.63	0	96.818	7.032	0.279	7.643	10.726	14.094	1623.93	2872.44	2.799	70.676	-5.65464	3.24401
1340	615295	27	870.606	822.653	928.521	32.503	24.556	0	11.086	0	0	0	7.562	15.666	17.297	39.157	10.798	2.635	0	22.555	13.055	2.381	1.06	11.526	38.248	0.806	137.71	5.958	6.967	11.792	26.341	8.744	2053.41	3451.06	14.353	52.884	8.3155	18.8082
1341	615335	32	1789.74	1867.19	2053.64	64.787	19.88	20.084	5.87	0	0	0	6.102	13.974	5.593	27.31	7.815	8.63	7.589	11.795	16.878	2.362	3.895	0.163	22.414	0.651	260.64	22.905	9.918	2.198	22.247	19.11	2298.12	3579.76	29.199	71.006	6.16045	21.5596
1342	615548	39	2311.82	2247.64	2653.46	129.244	33.12	31.786	28.026	2.008	0	12.712	44.135	125.546	79.108	408.327	55.18	9.093	0	57.42	37.981	33.039	24.63	45.76	51.29	7.075	585.262	56.204	8.03	8.8	55.527	33.66	4108.86	7269.06	21.548	123.578	24.1918	-7.36245
1343	615589	62	2557.56	2584.22	2750.13	153.186	76.354	43.001	55.329	0	0	18.878	11.369	21.412	18.394	105.031	62.561	22.872	11.325	94.937	61.916	4.495	7.335	259.61	69.865	6.932	791.369	35.86	22.3	8.321	563.391	467.525	3396.83	5834.19	27.787	104.374	26.8952	9.97637
1344	616001	39	1892.53	2099.07	2180.82	67.537	25.957	12.63	6.04	0	0	15.805	9.089	19.882	6.967	69.649	4.02	4.136	2.794	29.045	32.427	3.536	0.509	13.743	41.778	1.878	486.889	14.99	3.086	1.895	40.206	8.159	3158.03	5778.61	30.815	106.784	16.606	15.1901
1345	616060	43	3055.57	3097.01	3388.15	178.666	64.582	52.107	24.139	0.251	0	0	7.484	56.401	43.993	227.772	22.583	18.917	4.934	91.813	62.225	49.175	6.002	65.359	88.309	12.287	825.206	54.082	27.481	14.623	196.244	303.489	5867.67	11265.8	29.724	34.877	22.3559	-7.8518
1346	616193	41	2212.91	2277.01	2449.77	137.679	26.836	21.079	20.157	0	0	6.834	9.23	30.694	25.247	48.886	7.98	16.049	4.842	54.081	30.807	1.797	5.712	3.039	68.385	4.879	516.585	35.45	6.193	13.226	34.024	28.946	4446.84	7990.07	27.886	54.64	24.3169	16.841
1347	616344	52	2386.98	2390.06	2532.48	152.084	70.506	30.238	48.814	0	0	7.781	25.521	36.92	7.818	247.014	122.394	23.875	2.358	74.186	28.148	16.078	6.458	148.909	127.054	6.568	932.841	106.656	22.554	21.303	271.234	195.31	6423.49	11846.7	35.675	82.409	29.2132	-3.65501
1348	616370	48	3554.02	3695.22	4019.05	152.461	41.487	21.496	15.799	0	0	17.02	0.686	327.483	5.796	30.368	6.379	0	0	43.669	23.044	5.175	4.445	1.584	113.076	0.716	628.26	19.29	5.977	1.606	66.25	8.993	1800.83	3398.54	57.217	65.072	-11.0614	10.0703
1349	616403	26	241.688	314	300.596	6.736	10.057	4.811	0	0	0	0	0	0	0.779	4.684	3.639	0	3.145	4.489	2.423	0	3.516	0	4.074	0	104.263	2.017	0.078	0.851	2.062	3.008	425.411	716.784	8.322	0	-8.82506	28.3367
1350	616411	35	1329.57	1461.2	1708.87	66.296	24.639	17.711	5.067	0	0	0	16.427	22.135	17.079	142.549	22.729	0.854	1.762	20.626	29.296	10.334	6.908	3.043	33.518	2.258	215.511	10.623	13.278	19.068	35.832	9.29	1302.08	2227.85	14.615	73.543	13.2038	5.13859
1351	616555	45	1714.48	1846.83	2275.65	65.849	34.426	17.394	0	0	4.877	17.965	0	16.601	5.894	54.482	0	6.082	0	20.459	0	4.198	0	1.658	3.826	0	36.727	6.974	0	0.366	0.117	8.476	893.259	1691.15	9.274	80.129	-7.12353	12.5261
1352	616639	45	4041.05	3752.48	4123.83	225.204	52.753	21.809	19.308	1.632	1.301	5.483	14.931	45.279	14.645	80.948	25.779	19.251	4.92	45.216	39.708	10.074	10.792	113.561	73.955	4.496	656.906	60.37	7.05	4.047	264.935	91.659	5077.76	9061.49	36.129	9.775	26.056	6.24859
1353	616679	39	1941.23	1942.76	2244.53	110.756	26.613	26.532	7.777	0	0	0	3.443	35.929	15.946	66	21.595	3.162	2.063	36.182	13.966	16.719	0	2.815	47.406	4.734	459.234	27.846	3.402	4.929	29.237	26.965	3059.26	5229.71	45.045	57.366	18.1196	1.88748
1354	616703	20	1526.67	1401.41	1708.08	56.192	44.428	16.002	4.142	0	0	2.085	13.575	36.095	44.319	113.876	29.325	10.885	3.259	10.691	14.23	12.377	2.572	16.457	61.554	8.044	414.015	5.114	17.267	9.734	30.935	81.513	2750.29	4925.79	11.222	54.598	12.0336	5.09269
1355	616913	47	2359.83	2242.18	2707.76	155.625	57.192	8.904	17.918	0	0	5.659	18.111	32.663	19.804	79.135	25.251	14.514	4.917	58.653	21.8	0	0	15.291	84.791	5.296	699.422	76.817	3.073	2.033	40.965	63.752	4392.84	7967.8	25.647	103.628	29.9087	10.062
1356	617040	79	1120.63	1190	1218.03	57.109	31.732	16.569	4.606	0	0	53.324	29.572	21.091	22.584	83.665	0	12.171	2.848	18.708	0	2.265	14.559	12.214	11.007	0.503	260.788	14.297	15.154	3.637	43.47	18.354	938.712	1637.23	7.421	75.012	9.45236	16.3201
1357	617085	30	1677.69	1613.35	1920.4	60.765	17.516	6.429	21.44	0	0	0	12.111	42.043	17.175	105.015	13.37	10.53	0	28.526	14.938	4.287	7.583	20.99	41.529	8.181	579.394	34.088	8.274	4.892	76.561	122.88	3732.33	7006	6.681	69.069	22.9231	13.0113
1358	617201	35	2952.06	3037.16	3659.62	172.96	43.516	23.728	27.551	0	0	3.291	24.169	48.977	32.346	259.857	24.776	16.08	1.52	49.08	40.974	11.9	7.182	45.621	108.105	13.82	988.67	53.29	12.583	3.455	113.634	315.834	5840.87	10547.7	2.475	36.238	27.559	-1.31644
1359	617309	41	1418.27	1349.47	1546.73	64.679	31.337	12.108	0.338	0	0	0	6.545	20.698	5.601	69.896	3.674	5.773	0	57.464	14.519	0	7.484	0.218	43.059	4.181	411.74	27.373	8.446	2.921	8.817	10.881	2410.45	4568.27	42.345	63.692	23.2529	16.2568
1360	617409	50	6572.53	6562.04	7189.12	267.487	72.829	20.446	0	0	0	53.43	0	1.879	59.902	21.072	13.086	0.707	0.466	6.404	5.255	0.597	0.114	3.098	36.899	1.413	78.679	8.327	0	0	20.53	14.393	2151.96	4055.59	12.277	80.441	-2.41008	25.771
1361	617570	44	1920.88	1955.83	2101.06	111.111	41.91	33.407	1.495	0.84	0	0	4.849	20.388	18.122	54.368	28.511	2.905	0	48.733	7.085	7.089	3.445	8.779	81.005	2.354	429.248	29.397	21.564	5.49	43.621	12.654	1945.57	3632.72	73.588	26.987	21.1376	10.3638
1362	617621	47	1523.06	1460.86	1661.63	52.706	26.647	19.801	12.033	0	0	5.583	5.634	19.562	2.571	45.636	8.575	13.527	1.458	22.687	27.107	1.773	1.01	11.796	32.188	1.922	207.612	18.325	0.253	3.953	27.458	409.707	2549.64	4876.83	5.029	48.973	14.0402	17.1356
1363	617665	31	2221.52	2275.1	2794.08	116.289	17.726	22.162	0	1.478	0	23.712	4.501	196.175	4.595	2.445	0	8.538	0.005	4.121	2.447	0.957	0.553	0	4.144	0	101.689	0	0	0.236	17.318	14.191	1094.43	1915.72	0.439	32.099	-19.3842	16.7775
1364	617999	43	3304.95	3598.65	3613.71	142.977	33.799	26.191	12.66	0	0	20.466	9.397	26.291	12.164	22.607	4.968	12.63	1.219	26.769	9.222	2.443	1.519	0	41.542	0	360.876	25.948	4.286	4.365	40.466	4.596	3218.39	5503.41	71.782	41.007	15.8434	15.3815
1365	618099	26	905.7	858.499	1003.53	24.329	19.289	0	0.338	0	0	0	7.345	1.802	12.019	18.037	0	2.794	0	7.851	9.026	4.601	0	0	15.298	2.403	101.17	12.575	0	0.012	7.077	0.256	824.163	1194.43	27.766	38.965	-0.211354	26.8386
1366	618338	56	3286.65	3243.27	3911.76	154.576	66.828	25.909	28.561	0	0	23.993	21.473	44.989	20.404	181.161	30.979	27.111	3.961	57.215	25.722	19.09	5.004	36.261	60.552	5.408	860.568	57.028	14.136	7.517	90.155	203.355	5617.23	10239.5	39.087	47.026	23.053	-1.19621
1367	618387	31	809.283	927.762	870.406	38.582	8.165	6.664	7.438	0	0	8.79	22.334	21.164	10.191	64.773	18.409	6.605	0	16.586	11.893	0.519	8.986	8.395	12.933	2.462	179.142	19.483	14.037	0	7.493	7.376	757.78	1215.38	9.561	42.949	7.44354	18.0029
1368	618419	35	3774.51	3890.11	4217.01	144.284	41.052	17.763	2.879	0	0	8.824	7.367	14.028	9.411	67.288	9.695	5.742	0.266	38.473	23.088	8.852	3.831	3.017	60.771	3.03	402.638	6.675	10.999	3.608	14.783	28.203	4260.74	7673.94	28.948	76.301	16.5074	6.98113
1369	618428	52	3563.98	3298.45	3702.26	154.843	60.007	40.263	50.355	0	0	31.511	34.302	209.696	78.262	798.491	139.33	36.931	7.587	83.378	95.707	41.651	14.547	142.788	74.963	19.783	1002.71	33.138	37.359	40.36	396.012	728.078	5355.56	9379.34	25.571	98.227	24.8104	-9.09792
1370	618681	43	1689.74	1686.19	1743.06	78.071	14.496	15.009	30.958	0	0	0	15.558	24.231	14.943	62.335	12.597	6.608	3.114	43.025	5.329	4.768	2.908	11.301	36.635	0	561.715	45.406	3.084	11.422	31.824	80.342	3016.37	5543.29	4.804	43.997	22.1122	12.0927
1371	618803	33	2759.88	2848.63	3021.39	135.205	31.449	21.611	10.371	0	0	11.413	10.261	21.177	22.106	69.907	24.176	46.992	0.757	64.394	39.786	1.69	1.551	98.691	80.329	8.279	742.689	59.628	6.171	6.036	247.311	46.575	5312.39	9973.49	20.043	39.132	27.9564	10.1071
1372	618810	84	6111.7	5851.46	6555.51	303.151	80.689	33.646	0	0	0	3.5	8.422	190.53	13.539	35.695	4.414	7.507	0	19.011	10.092	22.858	23.722	0.795	35.98	0	252.687	10.338	0	0.652	21.527	58.189	2211.25	4039.27	24.142	21.536	-15.6941	7.34798
1373	618832	26	738.46	655.293	827.559	28.836	8.071	5.241	0	0	0	7.519	9.142	1.251	3.22	17.115	1.002	0	2.067	0	0.347	0.999	0.995	2.38	23.375	0	119.959	9.238	0	0	7.106	2.247	905.107	1779.09	14.364	29.724	-3.87192	25.0482
1374	618916	44	2924.1	2984.9	3648.98	181.085	31.93	31.575	13.757	0.141	3.466	12.925	11.733	21.891	8.598	158.528	17.4	5.421	0	41.536	21.507	3.735	13.259	33.124	57.01	12.824	820.861	36.664	21.342	0.162	60.957	44.07	5369.5	10164	4.318	90.299	21.1608	5.05055
1375	619034	43	3514.66	3610.5	4094.64	175.75	45.413	25.933	18.333	0	0	0	14.789	42.679	46.811	242.104	24.123	18.507	5.01	95.977	39.508	8.805	17.276	36.511	118.315	8.335	784.664	72.79	12.086	6.908	63.853	420.07	5725.23	10325.5	22.397	92.041	29.8878	-1.32374
1376	619145	51	1093.33	977.964	1125.72	80.465	30.488	8.84	5.168	0	0	23.665	6.269	19.569	0.337	50.781	7.407	6.408	7.782	38.581	27.538	1.002	0	12.19	18.774	0	301.595	17.064	3.499	1.315	21.405	17.834	1459.33	2454.58	7.24	74.515	15.0018	19.3691
1377	619228	31	1714.65	1615.9	1965.77	88.609	21.429	14	3.642	0.172	0	0	14.279	15.972	8.851	52.896	7.807	1.506	2.593	38.967	10.785	58.738	4.774	7.656	33.961	2.722	242.422	11.475	0	7.267	30.567	2.777	1745.79	3344.73	19.337	61.064	11.7446	2.59914
1378	619331	24	1674.77	1549.02	1904.04	98.893	59.401	32.329	1.226	4.921	0	0	6.41	16.55	11.565	59.828	2.775	1.394	0.189	49.428	10.936	0	2.212	5.473	45.032	0	415.251	15.672	3.024	5.344	25.344	102.401	2707.4	4590.59	18.051	67.294	16.3619	22.1195
1379	619422	40	1301.87	1250.86	1442.14	78.869	48.26	24.48	29.783	0	0	13.89	8.093	33.2	11.135	78.644	11.875	6.582	0	23.726	11.399	4.614	19.138	24.569	48.529	12.059	494.883	33.728	14.435	5.004	48.965	288.353	2872.29	5683.73	42.606	21.153	22.5233	12.8995
1380	619430	62	8711.43	8655.02	9878.44	398.198	183.789	65.22	1.356	2.887	0	24.908	1.483	516.153	0	17.998	6.273	7.928	2.493	22.789	6.81	12.114	12.454	6.823	27.277	0.338	237.381	16.674	5.186	8.037	28.954	98.412	4141.65	7451.08	4.58	41.204	-13.4341	8.77652
1381	619468	45	3186.26	3213.07	3474.44	158.27	58.692	34.469	15.99	0.712	0	0	13.582	20.536	5.014	99.809	20.227	1.653	3.479	62.467	25.527	4.559	16.52	26.338	65.716	2.908	571.266	27.572	4.26	6.308	91.655	42.258	5540.99	9690.95	18.385	59.604	25.6594	9.94048
1382	619770	38	2592.9	2574.18	2769.88	109.843	31.907	10.614	11.386	2.533	0	5.278	5.368	32.065	11.042	31.698	18.842	5.372	0	10.487	3.004	5.744	7.713	2.976	30.315	0	447.173	22.074	5.679	0	6.766	25.859	2240.06	4002.5	30.684	92.784	15.5931	12.6407
1383	619902	33	2972.44	2916.55	3359.57	151.129	35.04	20.006	10.359	0	0	4.944	10.743	19.966	10.796	183.533	18.058	19.206	3.254	63.835	30.661	11.614	5.084	20.056	100.886	2.252	846.053	60.29	4.382	3.284	60.538	56.259	4998.97	8775.74	35.176	42.208	24.3239	1.16703
1384	620024	37	2737.8	2669.79	2958.13	97.75	26.481	19.016	4.09	0	0	0	6.011	21.343	2.904	29.459	8.968	2.009	1.668	54.953	10.938	3.834	5.878	7.409	44.228	0.713	372.763	49.048	5.678	18.872	47.296	20.816	3186.81	5193.69	17.476	79.44	20.3097	11.484
1385	620065	35	2332.65	2071.53	2591	115.076	357.199	34.949	42.693	0	0	75.397	13.657	37.292	26.413	367.449	102.895	6.155	14.74	61.668	35.021	4.356	2.325	309.596	84.324	7.028	831.096	31.865	13.187	18.151	671.832	243.842	5482.98	9720.44	39.549	4.644	23.0062	0.0802866
1386	620133	37	2215.33	2151.9	2504.78	71.162	30.868	29.677	22.056	0	0	25.776	17.835	47.153	29.988	157.134	17.1	9.504	1.491	53.329	42.553	6.518	6.672	21.824	100.337	15.809	770.047	64.32	6.656	5.5	68.574	63.099	5058.83	9239.67	3.406	134.569	28.0328	4.47502
1387	620150	47	3280.49	3236.9	3607.87	140.42	58.699	43.715	31.678	0	0	13.084	16.457	100.921	33.964	411.116	50.349	10.951	7.291	95.559	42.526	37.878	18.814	49.927	65.169	7.569	962.605	69.376	29.227	20.947	190.938	525.339	6309.32	11523.8	32.505	60.124	25.3458	-7.86863
1388	620164	54	2255.18	2436.22	2829.07	173.968	56.696	44.471	31.644	0	2.839	2.829	20.074	70.706	42.167	359.599	70.481	47.988	4.236	56.845	41.611	17.453	5.125	34.215	90.321	12.829	930.017	68.922	21.967	22.129	117.575	1264.89	4521.92	8083.1	29.367	97.043	26.0768	-5.5688
1389	620201	45	2892.25	2967.44	3365.38	129.649	56.693	26.369	18.981	0	1.819	7.312	16.246	26.93	22.366	183.489	26.986	1.548	11.347	45.413	32.052	4.679	12.73	25.581	81.335	0.605	557.525	37.976	19.578	24.289	47.662	70.702	4694.6	8388.68	18.8	63.222	21.9336	3.94244
1390	620294	65	1141.11	1198.35	1321.87	66.998	23.135	11.584	8.211	0	0	0	11.908	0	8.999	45.278	9.426	0.773	3.924	31.686	10.355	0	5.637	4.804	24.232	2.331	323.319	29.521	1.937	0	1.032	29.994	1981.62	3877.34	5.231	33.371	10.4733	27.334
1391	620313	43	2095.54	2051.63	2393.58	101.636	31.16	18.932	52.298	0	0	0	40.994	148.097	71.857	509.87	45.638	548.18	11.922	66.788	29.965	37.024	16.151	25.114	25.144	5.078	564.434	14.266	35.903	46.19	88.021	889.376	3163.82	6180.73	3.017	76.393	22.4194	-6.45965
1392	620370	45	1526.48	1453.36	1681.76	104.607	17.034	14.787	8.374	2.691	1.538	3.287	17.388	34.295	23.052	114.706	22.555	25.785	12.148	28.892	40.785	18.481	12.56	15.961	42.531	2.367	244.168	11.996	10.679	13.821	23.89	28.559	1446.74	2571.31	36.034	100.231	13.9608	4.29732
1393	620401	64	2473.24	3025.49	3171.07	178.816	52.092	29.749	26.34	0	1.102	26.891	10.105	20.889	19.16	126.39	36.418	36.101	3.12	59.284	56.701	3.768	8.754	15.797	99.853	12.952	821.637	69.801	3.645	2.277	46.489	60.808	4247.64	7341.26	12.657	172.205	28.6614	7.81289
1394	620615	32	2828.66	2975.31	3183.73	139.11	26.67	20.854	8.778	0	0	0	12.953	63.865	50.251	300.601	31.302	6.666	7.367	48.915	38.809	20.764	4.942	172.108	40.407	5.006	654.757	27.879	3.37	26.56	341.543	582.292	6179.87	11036.5	15.891	23.172	21.2188	-3.72483
1395	620648	37	2514.31	2387	2788.39	149.255	41.899	23.716	7.997	1.558	0	0	6.188	31.033	11.178	112.688	16.122	11.066	6.656	101.431	37.765	17.446	0	38.542	125.888	3.681	977.539	60.126	12.282	0	161.792	91.578	3995.14	7507.43	23.756	36.554	27.5531	-2.0913
1396	620843	31	2505.78	2471.14	2706.18	135.472	28.248	10.251	28.294	0	0	4.992	19.131	23.602	28.151	145.699	36.26	7.798	14.486	65.755	17.94	15.898	9.634	52.042	71.873	4.711	653.552	33.255	18.014	7.516	193.284	695.122	5585.75	10675.5	4.361	20.618	22.5888	1.68529
1397	620881	61	2825.95	2798.79	3422.43	135.231	58.084	35.797	56.203	0	0	0	24.465	112.715	77.84	377.444	74.01	41.125	6.884	67.323	45.871	33.546	36.742	108.696	112.257	22.312	958.32	48.991	34.776	25.347	319.775	577.228	5897.57	10695.5	30.211	84.732	25.0434	-7.57339
1398	620938	55	4579.14	4667.52	4875.24	252.603	47.816	43.007	41.147	1.622	0	10.286	33.599	86.965	84.565	483.586	432.594	25.3	0.004	106.645	48.572	40.641	37.812	116.374	141.487	36.129	1236.05	79.685	41.259	33.788	261.327	752.46	5208.55	9086.82	24.897	94.071	26.8431	-8.3477
1399	620974	26	2307.13	2222.61	2508.78	119.414	32.263	33.944	3.746	0	0	22.76	5.983	3.546	5.198	379.619	7.414	0	0	34.09	8.657	37.05	0.495	5.943	11.58	0	463.187	19.952	0	0	12.778	19.411	1074.35	2121.11	0.206	35.788	7.54371	-9.3815
1400	621024	39	2612.02	2631.03	2985.54	115.687	48.272	4.273	27.323	2.628	0	18.075	29.115	74.164	47.471	361.793	19.716	20.543	1.857	87.915	56.08	28.678	11.779	25.977	60.743	0.406	871.2	38.316	15.645	18.122	76.638	131.427	5769.91	10372.4	18.349	55.545	22.8032	-5.04942
1401	621032	50	2768.76	2648.65	3134.11	145.963	44.531	16.648	21.004	0	0	0	8.109	62.134	5.801	88.079	21.616	9.632	1.563	35.137	14.342	14.383	0	12.834	53.748	5.8	500.747	61.478	13.306	3.616	60.946	56.776	4192.02	7719.52	20.033	139.61	22.3584	6.81561
1402	621087	46	1265.66	1282.97	1412.56	84.657	21.784	12.506	3.426	0	1.621	0	10.724	22.994	15.374	62.353	7.534	6.074	3.482	23.413	20.524	9.529	1.773	8.731	27.666	1.105	228.598	19.911	1.185	3.803	30.986	36.897	1374.44	2544.54	39.853	29.515	14.2779	10.3294
1403	621217	52	1559.83	1366.83	1596.62	64.585	14.961	30.397	6.322	0	0	0	4.998	17.065	13.944	79.082	6.445	3.664	0	20.127	15.56	3.016	0.396	10.049	25.493	9.143	345.062	29.184	12.188	4.016	18.987	15.859	1536.03	2792.68	13.715	68.709	14.4043	14.9882
1404	621471	22	6840.57	7113.87	7858.44	300.989	37.857	13.648	0.614	0	0	4.154	0.648	3.685	9.87	1256.03	0	6.653	1.249	28.835	8.206	353.198	1.113	3.297	43.698	0	2142.18	7.589	0.144	0	10.083	1.597	2465.57	4681.38	13.943	42.397	-14.9183	-7.34782
1405	621605	34	1810.63	1779	2086.74	77.299	25.667	5.336	4.764	0	0	1.488	8.209	14.778	17.972	37.891	4.619	19.009	0	25.798	9.187	8.445	0	5.155	62.344	0.18	292.287	30.48	15.154	2.864	30.23	1.694	2431.62	4373.17	24.475	65.655	13.0581	11.8415
1406	621634	31	2447.9	2661.76	2749.03	127.717	32.404	19.886	35.823	0	0	5.176	9.221	72.794	53.625	312.416	24.075	16.543	0	27.779	47.504	16.666	6.077	78.338	42.503	6.582	591.993	35.393	17.159	27.486	252.341	260.647	6291.85	11156.3	18.23	107.138	20.9252	-3.0712
1407	621713	28	1182.19	1320.36	1414.08	58.716	22.449	12.824	2.132	0	0	1.408	8.266	7.831	4.074	17.416	6.219	3.337	0	12.979	15.29	9.185	0	0	15.97	2.671	137.681	10.596	2.398	0	17.291	2.119	1112.22	2042.43	42.071	29.709	0.528493	14.0627
1408	621743	34	1218.11	1157.26	1371.46	29.389	36.137	5.807	7.731	0	0	0	5.671	26.424	6.698	39.212	22.4	8.454	2.414	22.157	14.675	1.716	0	23.669	40.886	0	208.244	9.879	14.283	2.193	48.223	67.889	1990.83	3368.95	38.486	27.385	12.2794	18.9658
1409	621826	43	1921.83	2019.87	2193.08	66.593	42.961	14.064	11.574	0	0	0	10.546	24.437	52.141	70.174	15.443	8.105	2.006	36.361	23.278	0	2.949	23.24	29.607	11.924	487.34	32.874	7.441	4.637	59.694	129.441	4310.4	6962.66	42.083	106.232	22.4812	15.5751
1410	621858	45	2266.37	2227.03	2323.41	95.582	37.418	13.536	3.855	0	0	0	10.008	21.32	6.568	31.61	2.687	8.348	2.017	23.286	11.935	6.396	1.315	0	44.341	0	322.029	8.38	4.267	1.923	0	12.9	1520.56	2775.09	60.626	123.381	13.2088	11.7517
1411	622087	78	1768.76	1713.7	2021.83	68.768	37.955	9.503	10.337	0.566	0	2.3	5.054	22.508	8.842	73.433	15.696	8.812	9.575	47.374	17.741	0	5.15	0	35.016	5.483	359.044	30.024	10.644	0	20.869	26.761	2881.89	5555.06	50.652	110.39	22.6002	15.9354
1412	622179	51	2938.4	2935.59	3208.08	161.224	39.635	12.287	11.791	0	0	13.833	7.502	12.39	9.515	144.31	8.771	17.33	12.865	46.424	18.936	7.66	0	33.223	67.656	4.418	757.176	32.21	0.697	9.36	86.836	169.163	4815.4	8669.15	34.543	12.802	21.3241	4.72632
1413	622191	50	9800.91	10000	11401	360.166	114.911	52.464	0	0	0	0	3.421	626.36	9.853	10.017	0.3	2.085	3.878	39.89	22.506	60.736	9.276	1.803	48.908	0.68	442.384	17.228	1.011	2.758	48.119	4.835	4268.6	7503.4	62.39	43.475	-13.1477	6.35268
1414	622354	34	1999.34	2090.27	2394.3	118.598	20.901	16.628	0	2.02	4.509	22.548	3.824	1.868	6.485	149.073	0	0	1.41	13.973	0	0	0	6.957	0.689	0	53.681	1.624	0	1.163	4.75	0.028	907.618	1726.27	1.621	30.346	-0.567431	6.05871
1415	622549	31	2202.23	2168.99	2503.84	92.632	26.455	6.135	0	0	1.759	19.936	0	6.35	1.834	246.717	0.628	2.022	1.978	5.723	0.405	0	9.491	5.492	33.293	0	29.617	4.254	0	0.489	0	28.724	958.305	2033.05	0.881	0	-0.171436	7.72668
1416	622577	46	3229.42	3530.81	3642.48	125.576	49.799	12.532	12.704	0.075	0	1.35	25.8	23.761	11.261	81.808	3.919	4.872	3.07	61.387	26.106	0.724	0	3.927	81.969	5.823	608.807	32.033	5.269	0	39.053	46.927	3261.17	5819.09	23.47	63.791	28.1467	11.7553
1417	622605	44	3012.88	3026.56	3648.3	152.114	57.142	31.128	23.181	0.939	0	9.721	18.93	72.877	32.903	274.615	58.731	17.807	3.639	98.01	71.124	20.728	10.213	64.478	120.869	24.873	1033.01	63.139	26.844	24.462	275.325	880.073	5899.46	10340.4	6.372	103.885	27.0222	-6.1555
1418	622973	39	2690.24	2719.26	3089.14	148.132	43.359	44.748	29.847	0	0	0	15.377	40.372	24.624	166.362	28.321	15.618	18.484	62.454	44.021	29.675	11.219	38.69	61.374	12.992	576.652	47.519	20.21	18.696	122.215	166.535	6622.89	12780.4	70.229	41.554	21.7666	-1.77923
1419	623041	37	365.738	398.439	500.811	26.263	5.586	2.509	0	0	0	0	0.991	0	4.316	19.549	7.215	0	0	10.524	14.421	5.064	0	4.451	6.168	4.548	115.231	16.864	1.126	0	7.276	8.087	446.537	802.167	6.995	0	-0.897162	27.4918
1420	623133	30	1081.42	1003.33	1387.48	72.52	33.748	8.227	10.744	0	0	43.128	68.392	292.997	118.428	995.212	129.996	33.528	1.774	62.011	49.024	67.611	20.334	51.625	43.334	14.116	610.249	14.162	27.72	36.478	120.082	147.25	2157.44	3953.76	7.157	19.734	-10.461	2.1746
1421	623222	49	2142.39	2190.99	2401.16	128.145	65.954	16.615	12.716	5.739	0	16.193	14.973	71.515	58.294	304.961	23.513	9.71	3.134	52.278	26.425	10.489	19.717	28.836	66.246	25.576	576.269	41.191	20.704	11.061	48.639	71.302	3991.31	7246.74	31.485	48.643	24.2583	-2.90175
1422	623344	85	4489.87	4953.98	5257.63	261.461	121.794	43.986	28.073	0	0	17.438	35.796	26.666	39.82	169.835	48.499	27.995	2.393	75.468	44.939	14.462	72.474	105.77	108.366	2.257	932.591	52.624	13.167	9.836	323.29	932.539	6506.32	11519.3	39.974	177.306	24.204	0.464633
1423	623479	69	8046.67	7496.19	8402.74	1165.54	142.367	684.318	0	0	0	100.56	8.287	41.723	11.687	1642.39	18.644	15.442	3.399	129.933	33.872	164.75	10.847	12.291	44.371	30.677	5794.19	22.929	10.407	6.784	34.912	31.646	6516.77	11242.9	15.354	46.522	-24.8781	-15.612
1424	623485	19	2366.52	2497.38	2747.89	111.367	32.94	12.312	12.872	0	0	0	7.618	24.76	5.748	72.613	18.722	7.25	0	52.273	9.969	6.7	6.006	8.161	35.296	4.203	604.036	26.389	4.4	0.034	4.087	7.629	2931.92	5271.3	7.175	144.998	19.735	5.10036
1425	623563	65	3423.75	3643.35	3755.51	180.038	48.846	13.774	14.391	0	0	0	17.665	43.709	13.108	102.673	27.528	17.437	2.716	66.582	26.037	13.242	4.255	42.653	84.811	6.483	741.284	36.748	14.572	0.264	120.811	38.83	4930.3	8695.62	28.54	112.053	26.3301	-0.70814
1426	623684	34	1327.96	1429.05	1652.85	52.163	20.185	15.806	1.357	6.854	0	0	2.974	24.22	5.935	40.356	8.835	1.357	4.206	28.719	12.628	0.776	1.139	10.093	68.154	1.904	314.247	32.345	5.962	0	19.063	4.24	2418.41	4578.64	14.057	72.801	18.4961	18.9032
1427	623722	26	3231	3304.91	4293.07	561.078	53.188	18.792	23.138	0	0	15.08	9.173	59.548	0	142.67	34.63	21.022	2.291	67.624	46.942	35.23	11.323	94.42	82.583	4.47	877.154	84.778	29.382	1.221	217.968	94.891	5606.74	10150.4	11.072	45.958	26.2906	-4.87883
1428	623985	35	1109.69	1202.19	1312.72	69.295	29.123	13.036	13.682	0	1.921	0	6.927	16.789	19.723	59.156	204.749	11.428	2.522	38.196	14.746	9.254	2.539	4.95	51.937	12.357	290.91	18.558	3.027	2.541	43.359	48.766	2877	5210.58	38.544	4.603	16.8217	6.88427
1429	624016	33	962.496	968.048	1136.33	61.072	21.129	15.459	15.955	0	0	23.364	10.837	30.291	27.714	109.697	6.089	8.084	1.679	53.982	11.27	0.65	10.141	19.047	63.132	5.614	541.952	20.28	8.497	2.394	74.204	170.526	2520.47	4426.52	9.382	69.506	24.5421	14.6845
1430	624146	54	1707.22	1884.44	2201.28	87.145	61.892	29.856	17.534	0	1.221	11.073	4.054	18.428	26.6	58.048	4.515	10.325	4.487	30.595	20.935	61.25	5.938	8.314	32.325	2.875	341.671	32.426	15.751	7.706	36.285	17.428	3338.75	6266.19	27.655	103.378	13.9419	1.06747
1431	624194	59	946.311	1059.56	1162.34	62.413	17.653	20.594	0	0	0	2.321	13.846	15.669	0	41.874	9.967	0.269	0	19.325	7.795	0	12.547	2.12	41.282	3.17	175.288	16.093	0.699	0	4.426	0	1100.86	1609.32	14.403	41.168	12.3584	21.1145
1432	624548	21	1644.46	1705.06	1848.05	94.333	47.986	25.427	44.777	0	0	1.728	3.09	51.249	17.154	221.018	303.372	7.606	0.471	60.745	26.71	5.497	6.02	70.53	91.536	20.159	1042.36	38.048	7.554	3.364	209.462	219.587	4328.66	7686.72	19.053	0	28.6465	1.0483
1433	624566	43	1578.39	1476.68	1767.37	83.738	33.883	10.673	0	0	0	9.129	2.519	12.293	19.446	41.981	0.127	8.286	0.218	12.487	4.206	0	2.434	7.547	12.938	6.023	136.918	14.978	4.899	2.535	13.575	3.888	1266.73	2406.76	25.276	50.514	-1.1208	19.2828
1434	624684	56	3820.02	3649.29	4384.63	165.26	67.699	27.505	26.256	2.263	0	0	12.662	42.618	28.607	212.089	45.45	18.971	3.474	52.822	53.286	25.016	7.875	18.534	53.169	12.141	644.332	30.578	22.622	15.234	48.674	31.035	3401.93	5819.98	41.69	171.605	21.5767	-3.24316
1435	624766	16	1802.16	1910.05	2355.07	119.74	34.591	51.746	8.469	0	0	10.083	31.543	35.035	28.323	285.109	40.853	25.374	0	42.768	21.165	13.713	4.41	15.85	36.118	5.856	505.342	26.024	31.56	15.741	16.984	21.34	3076.35	5895.89	9.797	22.111	19.0803	-1.94563
1436	624767	39	3832.48	3965.67	4532.5	160.653	30.322	20.726	0.143	0	0	17.589	5.109	275.314	0	16.087	3.621	11.53	0	8.184	11.428	1.513	1.225	6.59	1.534	0	64.518	3.633	0	4.333	4.058	10.696	1635.28	2823.06	11.648	31.194	-22.4321	16.6479
1437	624888	37	4376.08	4082.84	4800.01	178.98	40.101	11.828	0	6.117	0	37.125	0	3.901	2.006	381.182	4.793	0	0.532	19.426	2.688	39.486	10.397	2.791	2.266	2.272	414.79	6.571	3.451	0.317	1.162	3.007	1993.06	3192.7	13.412	22.24	1.06129	0.0139814
1438	625139	43	2542.56	2387.43	2692.79	119.721	42.312	27.789	2.803	3.21	0	4.011	33.291	29.598	25.432	66.549	7.453	6.44	0	53.894	10.616	0.236	7.065	24.309	123.248	5.393	452.673	64.785	0.251	0	20.461	11.493	2802.66	4909.92	13.669	63.177	29.743	10.6568
1439	625375	26	1013.03	1146.05	1272.68	104.938	46.579	24.166	13.965	0	0	0	9.111	28.158	15.201	100.37	13.171	4.85	0	37.349	6.515	7.153	6.49	28.734	47.025	0	365.75	31.815	20.888	9.256	86.232	78.999	2933.79	5053.33	30.433	6.998	18.8844	4.55582
1440	625419	43	1352.83	1549.29	1546	88.877	30.318	15.34	21.241	0	0.126	3.23	12.57	43.975	9.63	121.199	25.653	12.287	5.466	38.982	10.221	1.205	4.657	155.942	34.98	3.866	508.711	43.568	11.241	4.314	314.006	319.968	3176.41	5616.62	21.258	70	23.7812	13.6266
1441	625438	49	3743.19	3733.45	4459.34	153.167	45.289	30.901	7.753	0	0	0	26.089	99.272	35.177	182.159	23.662	11.971	0.974	36.442	18.641	19.486	14.311	18.32	164.352	10.676	749.726	40.792	20.303	18.564	31.04	23.358	4110.47	7258.72	56.544	220.666	24.9902	-4.10849
1442	625441	12	1314.11	1291.88	1400.66	63.272	14.857	5.775	6.151	0	0	0	5.747	17.279	24.568	81.644	6.546	7.184	2.133	17.023	15.581	6.471	3.09	6.029	25.679	5.666	228.317	10.808	16.611	7.974	29.163	101.863	2467.71	4360.9	5.994	17.815	11.3615	6.2346
1443	625462	23	2301.43	2260	2491.38	155.879	34.442	41.881	24.661	0	0	0	11.08	31.566	23.408	84.93	27.565	14.389	1.437	24.649	7.272	13.3	3.399	53.056	30.267	4.293	567.865	21.552	21.782	7.461	141.751	57.727	4329.54	8038.8	14.595	23.319	15.8985	4.40389
1444	625505	26	3123.67	3412.7	3861.4	168.334	43.739	19.584	5.28	0	0	83.45	3.895	2.217	16.616	31.404	6.811	0	0	17.538	12.499	6.689	10.483	2.865	22.199	8.686	257.211	20.022	0	5.172	3.65	46.483	1669.57	3212.59	14.549	39.416	5.88277	26.5755
1445	625559	35	1745.79	1688.76	1838	57.771	25.746	21.698	6.124	0	0	0	11.434	44.32	51.498	148.106	17.054	14.084	4.693	51.531	15.78	13.124	0	12.484	66.197	12.651	609.771	25.904	4.063	5.833	102.787	197.124	3237.48	5983.17	34.973	3.077	21.1789	0.683935
1446	625786	23	945.333	1045.48	1052.56	49.78	24.572	18.881	4.609	0	0	18.194	7.427	22.516	0	86.526	0.812	0.111	0	37.558	0	1.671	5.169	0	36.949	0	433.932	19.005	0	2.633	13.22	22.019	1971.2	3273.31	8.107	11.262	19.6144	15.2262
1447	625858	35	3630.74	3623.07	4255.05	211.966	37.072	29.506	31.115	0	0	20.478	25.305	126.606	34.705	436.756	37.849	19.939	12.413	53.666	34.948	34.08	9.822	44.536	144.43	11.505	1220.73	42.799	17.601	17.639	98.335	220.833	6202.21	10759.7	28.324	198.452	25.1428	-7.95551
1448	625925	25	2592.16	2745.92	2925.77	102.133	55.795	20.701	9.877	2.047	0	20.457	5.491	38.097	13.659	177.609	10.846	25.42	0	62.375	26.86	14.326	0	8.397	80.938	10.844	577.635	94.994	9.975	6.588	24.503	62.356	3866.7	7243.51	48.563	53.75	27.1839	-1.98185
1449	625973	25	1376.48	1263.23	1450.59	84.319	25.494	57.272	18.679	0.086	0	0	12.387	20.88	23.386	58.501	12.173	6.97	2.483	29.647	9.546	21.354	0	5.18	19.931	4.719	392.944	23.979	18.451	0	34.383	13.417	2178.07	3642.53	28.107	44.937	12.7851	5.68483
1450	626031	45	2265.58	2342.85	2383.79	115.396	17.165	20.614	16.183	7.155	0	26.524	8.616	33.516	16.816	131.307	26.69	12.078	0.363	46.234	35.271	19.123	20.031	9.353	83.334	0.349	578.705	48.37	12.882	3.967	41.028	37.88	3206.64	5644.93	36.786	144.308	22.9041	0.656678
1451	626172	38	3968.01	4015.54	4805.76	175.547	45.033	17.73	1.357	1.206	0	66.161	0.765	7.954	9.162	14.139	0.398	1.211	1.285	11.01	1.957	0	6.22	0.714	13.25	0	157.493	3.554	0	0	0	7.863	1241.23	2392.01	5.284	92.444	-5.45504	16.1384
1452	626183	60	923.895	856.221	868.168	59.035	21.796	42.086	0.886	11.474	0.053	0	2.888	0.191	2.183	41.438	11.053	2.185	1.194	0	0	4.818	0	0.948	19.017	3.372	110.649	0.11	3.428	2.162	14.728	3.756	902.01	1410.1	9.229	62.201	-7.80847	23.6412
1453	626202	36	2275.77	2279.98	2581.88	85.092	46.741	25.001	16.924	4.048	0	40.463	18.496	17.012	14.415	89.878	6.05	12.663	0.728	26.852	19.836	2.723	17.347	7.942	89.987	10.46	507.981	9.996	4.668	0	71.434	16.132	3305.59	5950.91	50.688	121.606	15.9591	14.7869
1454	626488	22	1326.27	1686.67	1496.63	77.912	28.906	7.497	14.794	0	0	5.415	4.804	26.87	11.833	81.598	15.427	7.324	1.456	50.199	24.475	7.741	8.994	22.427	63.763	2.653	507.156	48.648	5.895	2.72	55.045	25.226	2432.43	4104.44	19.363	14.401	24.5198	8.89364
1455	626536	32	1631.02	1699.82	1956.38	83.807	12.836	16.973	11.052	0	0	0	7.317	11.009	9.1	103.257	10.828	19.191	0.845	19.944	25.317	13.162	4.096	1.763	44.129	0.543	349.631	29.141	0.314	1.354	12.894	13.59	2420.94	4786.21	38.939	44.604	15.497	6.20843
1456	626999	51	1962.07	2042.97	2217.67	94.128	22.38	23.342	12.23	0	0	0	6.467	15.752	12.566	103.618	8.235	15.01	5.525	36.554	27.049	15.766	11.48	12.766	46.704	2.996	376.759	26.548	21.149	5.988	40.722	61.515	2610.91	4935.63	16.537	70.762	18.1254	5.33893
1457	627096	49	1837.67	1964.25	2071.69	104.731	40.02	23.455	15.427	5.715	0	0	15.594	18.959	16.268	92.339	10.101	6.798	2.213	45.68	23.159	0	10.532	15.645	40.758	2.13	448.15	24.863	0.094	7.755	22.526	35.982	3223.39	5669.59	35.622	54.769	23.1872	15.7954
1458	627209	39	8471.83	8159.82	9649.45	367.313	72.488	46.8	0	0	0	0	5.02	962.588	1.296	2.961	0	4.853	0	18.116	8.006	5.549	2.542	4.949	12.812	0.649	66.382	7.598	5.552	4.536	13.816	23.142	5238.01	10053	15.791	14.015	-16.4428	11.5476
1459	627277	37	3119.99	3331.15	3551.63	117.256	60.081	9.433	0	0	0	49.753	2.334	2.306	15.207	46.091	0	0.934	0	9.103	2.642	0	16.382	0	38.817	0.47	252.162	4.576	4.724	0.552	4.226	6.991	1906.51	3516.58	17.49	66.729	0.020347	23.8238
1460	627341	36	2759.79	2733.02	3061.01	105.575	33.114	30.533	22.009	1.262	1.133	1.825	4.638	20.838	13.748	121.652	6.781	10.849	0	47.334	38.535	4.176	5.256	27.25	79.414	20.275	746.812	51.817	5.273	14.133	62.59	69.458	5955.71	10912.7	23.075	46.948	27.6507	8.49873
1461	627478	15	1351.63	1412.22	1537.39	58.782	28.848	9.844	0	0	0	0	26.122	87.653	59.172	287.909	51.5	7.481	0	23.935	20.868	28.504	6.162	11.017	40.354	7.871	338.418	12.123	22.274	0	52.7	41.66	1571.21	2719.94	0.207	85.505	17.7679	-3.73288
1462	627539	15	2039.93	1916.98	2510.47	90.013	38.95	17.996	18.979	0	0	9.814	48.461	144.326	60.209	601.862	63.451	13.625	1.077	60.828	22.238	27.102	8.263	120.156	37.636	8.943	567.742	29.028	31.937	10.201	229.072	557.218	4249.46	8291.04	10.185	28.188	22.8872	-6.65405
1463	627541	29	1981.6	2076.18	1956.9	108.176	221.804	37.62	20.976	7.19	1.906	19.946	14.035	78.259	34.71	219.073	34.733	1.861	1.094	77.714	56.61	7.028	21.647	29.214	98.124	12.333	807.622	65.685	30.44	20.511	86.605	94.608	5442.62	9592.4	28.787	44.801	29.3523	0.320038
1464	627582	21	3238.44	3183.99	3578.57	118.25	29.228	19.8	6.026	0.115	0	23.764	11.219	8.32	27.626	90.034	59.634	28.471	1.635	59.228	100.284	9.388	4.737	166.785	73.5	6.081	623.488	32.344	21.206	7.995	304.791	428.697	4192.69	7656.62	20.915	56.806	22.6048	4.10936
1465	627595	29	2683.68	2989.95	3304.55	196.859	36.819	9.685	0.575	0	0	15.43	0	536.941	1.945	2.945	0	0.258	0	4.831	6.15	19.916	5.579	7.901	15.952	0	49.827	1.95	0	0	0	23.684	1723.57	2965.53	7.091	8.879	-18.7902	12
1466	627698	47	3311.34	3492.09	3830.85	169.189	44.578	14.052	6.424	0	0	0	14.005	30.87	27.79	54.386	9.4	18.846	1.182	51.402	35.652	4.848	0.18	36.632	67.565	4.503	534.587	33.98	10.785	4.654	64.124	58.775	4292.04	8173.75	22.306	79.841	22.6631	11.1671
1467	627847	41	1799.88	1837.31	2118.1	72.963	21.205	24.332	12.315	0	0	11.294	7.141	34.467	17.447	131.559	33.849	18.865	0.397	33.206	21.261	1.185	10.787	95.016	39.334	8.641	435.695	21.433	10.663	12.847	265.855	358.604	3566.61	6380.44	5.407	43.621	22.4897	14.3469
1468	628331	26	6542.62	6421.28	7757.42	365.771	34.939	22.402	0	0	0	22.525	6.082	515.192	3.376	25.367	5.902	14.655	2.966	13.535	7.033	0	4.78	0	9.412	0	170.298	5.548	6.678	6.633	20.271	25.254	3520.21	6233.49	26.135	50.935	-25.388	14.4092
1469	628387	15	3367.13	3526.12	3863.96	256.674	16.733	18.985	18.638	0	0	0	20.028	40.164	20.732	136.771	12.266	8.411	0.535	29.863	6.802	34.88	5.293	23.818	55.261	5.999	637.764	25.258	10.529	8.799	81.486	44.668	4621.01	7982.44	8.042	41.918	17.9776	-0.682138
1470	628531	50	3137.43	3199.56	3602.84	165.483	48.592	29.91	0.899	1.371	0	42.876	6.779	10.012	44.723	25.098	10.127	0	1.872	0.497	11.162	0.494	42.411	4.398	24.826	0	135.694	5.635	0.864	2.529	10.831	21.429	1380.98	2830.26	7.735	58.971	-1.23241	21.1318
1471	628774	14	1330.62	1458.51	1670.23	76.949	12.572	11.953	0.301	0	0	0	4.14	18.946	10.63	55.334	7.559	20.894	3.101	29.586	10.226	1.004	4.059	10.928	15.996	2.722	269.557	30.022	5.278	6.681	29.794	28.497	2479.62	4406.06	18.956	43.864	15.0435	19.108
1472	628800	13	1555.78	1523.02	1886.7	73.95	34.044	27.654	1.201	0	0	0.383	7.852	18.286	6.949	31.945	7.242	0.727	0	25.404	13.672	0.711	0	3.699	35.012	2.075	302.309	8.641	0.288	0	18.7	5.297	2197.25	4157.4	8.572	34.081	10.4251	18.7825
1473	629036	12	2102.32	2075.17	2269.75	170.404	62.662	28.034	7.481	0	1.481	14.892	19.05	15.18	6.389	144.035	16.913	38.293	0	75.201	11.92	8.911	10.333	41.454	137.812	21.269	1128.84	75.672	10.552	3.745	133.457	137.12	4804.6	8646.05	11.088	41.387	29.9763	-1.17644
1474	629214	15	2819.99	2710.07	3182.41	183.761	32.373	139.868	18.283	0	0	19.63	27.698	82.016	45.177	285.111	51.945	8.059	5.273	51.099	31.444	16.842	16.867	73.369	34.113	10.594	780.91	26.259	22.837	14.822	211.399	167.198	4625.15	9138.25	13.568	82.401	21.3038	-3.67081
1475	629356	32	4254.9	4445.74	5280.72	186.295	46.205	22.281	1.052	0	0	8.403	0	3.93	6.82	880.169	3.435	6.205	0	8.368	19.429	49.803	5.427	0	24.699	1.096	359.536	2.567	1.227	1.643	0	16.615	2256.64	3895.98	8.041	49.021	-3.16726	-0.201073
1476	629621	15	1692.79	1769.59	1941.73	164.393	74.932	44.562	28.581	0	0	0.188	18.739	13.515	23.15	73.909	6.882	6.226	3.02	34.358	10.587	0	4.093	138.878	74.161	14.361	737.533	56.758	22.502	5.249	416.585	508.806	4573.51	8218.51	21.129	42.649	27.271	12.9472
1477	629798	46	3271.5	3162.35	3624.66	157.736	37.62	17.278	21.386	0	0.284	0	15.809	24.624	32.842	173.583	30.479	17.073	0	44.732	47.207	24.876	12.769	40.828	71.111	7.4	465.585	38.433	19.775	8.005	37.508	114.557	4996.01	9075.46	40.338	38.799	19.4646	0.724876
1478	630380	13	1987.67	1825.53	2302.5	156.946	354.63	19.013	8.033	0.718	0.121	11.039	9.486	19.667	33.163	173.808	13.612	6.365	0	35.034	13.227	13.288	0.903	29.536	9.023	0	181.441	2.645	0.454	0	1.639	99.912	2059.7	3667.38	1.402	104.692	5.866	1.03818
1479	630900	14	3725.81	3810.38	4211.64	199.797	24.586	28.4	26.683	0	0	13.303	12.85	28.41	22.483	148.323	103.915	17.568	0.32	38.813	18.132	0.112	4.588	20.924	63.127	4.053	1010.35	40.222	13.305	6.78	50.568	78.821	5764.17	10695	15.059	49.833	26.1711	12.5114
1480	630990	62	3571.98	3657.5	3989.73	202.44	91.011	45.77	38.602	4.82	0	44.698	16.675	25.212	10.894	168.839	33.513	23.667	0	104.006	63.45	13.254	4.156	49.132	174.576	3.681	958.592	78.978	14.098	5.379	163.194	70.301	5769.9	10538.7	14.417	107.766	29.9933	-2.28415
1481	631494	18	1287.03	1193.78	1306.51	122.896	32.318	53.134	15.23	0	0	0.447	30.717	97.715	68.804	512.438	59.553	19.33	8.127	47.661	39.907	35.651	11.47	36.244	75.86	4.316	598.361	27.553	14.99	17.629	105.217	1607.5	3294.42	6095.2	7.744	35.213	23.134	-6.72415
1482	631958	48	3231.43	3533	3658.57	169.022	39.141	32.848	27.091	0	0	21.426	34.509	203.557	70.449	874.501	98.725	14.433	5.072	103.695	67.449	64.664	7.289	44.291	185.972	9.879	1374.02	76.118	19.306	37.656	124.455	546.402	6021.38	10912.5	51.618	133.627	25.7485	-9.42198
1483	632433	17	1839.31	1827.25	1956.26	117.41	64.978	24.636	10.904	0	0	0	15.168	19.876	18.935	81.477	14.79	9.457	8.715	65.939	9.416	4.924	0	23.895	45.652	0	532.242	53.91	10.722	3.485	45.194	170.106	2799.17	4976.72	24.949	72.224	25.2481	10.5554
1484	632469	19	1616.15	1596.48	1947.65	102.197	44.187	18.947	10.634	0	0	0	2.063	35.323	16.466	114.524	16.418	21.077	3.509	37.877	18.528	219.663	2.558	41.663	52.831	1.312	504.486	24.682	31.257	2.407	82.332	108.074	3190.92	6079.67	21.18	34.364	19.3174	-8.33848
1485	632475	25	4831.88	4843.86	5613.46	262.214	63.988	25.033	2.221	0	0	6.117	3.835	913.961	13.141	11.744	2.343	3.996	1.053	16.825	5.851	3.589	5.91	5.185	8.407	4.425	106.358	1.158	1.778	0	0	10.921	1803.89	3326.26	9.72	54.668	-16.9898	12.0155
1486	632683	47	1495.75	1522.41	1874.17	97.572	58.361	36.45	18.631	0	0	0	21.823	81.078	38.421	307.52	23.959	24.325	1.524	43.373	29.558	6.227	3.316	12.361	39.68	0.101	486.231	19.299	19.591	25.934	50.845	430.93	2911.67	5298.91	20.771	49.453	23.9176	5.28757
1487	632873	19	1898.56	1604.73	1696.94	247.295	159.924	101.719	0	0	9.279	1.695	4.843	26.326	12.407	79.325	0.811	15.654	0	29.777	0.501	4.804	0	13.951	45.273	2.253	399.772	18.135	12.704	15.29	42.145	11.877	2444.52	3782.43	4.193	50.451	17.4367	12.0692
1488	633087	38	2818.1	2835.14	3190.97	151.816	55.833	22.367	6.765	0	0	22.45	8.856	62.489	30.402	294.857	57.81	40.597	3.943	70.856	49.1	14.476	11.774	26.607	69.35	14.369	748.338	42.708	16.492	16.72	63.532	97.332	6165.93	11477.2	20.384	83.315	23.0623	-3.02495
1489	633099	14	5891.95	5681.92	6649.83	385.176	67.878	114.727	2.155	0	0.159	4.32	0.109	240.677	2.896	4.832	3.442	1.314	0	35.583	10.099	0.157	1.071	0	5.053	0	174.159	0	1.702	1.502	3.431	11.829	2600.11	4905.55	6.974	0	-14.7665	14.7971
1490	633129	37	3347.15	3611.7	3897.57	199.958	35.806	30.991	26.988	0	0	16.106	30.181	191.587	56.819	820.352	551.419	21.917	5.874	72.724	34.627	40.39	16.18	50.871	158.094	24.636	1489.36	91.015	18.57	31.309	199.077	587.493	6177.65	11585.3	11.35	110.381	25.9659	-9.22658
1491	633226	23	2034.56	1918.73	2288.63	119.686	28.107	36.656	4.535	0	0	9.155	13.5	34.135	32.894	214.974	13.603	16.065	1.384	65.829	19.212	12.484	12.597	19.316	28.185	4.447	562.895	37.892	29.226	26.536	40.265	11.876	4600.12	7991.34	5.523	64.56	21.533	0.0347195
1492	633227	24	1720.93	1874.88	1991.96	124.901	6.251	42.121	18.347	4.839	0.424	8.21	16.768	25.116	20.383	162.348	13.799	5.041	0	34.64	26.052	9.518	0	30.582	73.847	10.922	608.96	35.48	17.413	15.104	94.811	452.809	3784.16	6983.53	25.087	68.458	21.3768	3.11992
1493	633247	18	6196.12	6241.56	7392.27	236.483	28.224	10.059	2.924	0	0	11.709	5.598	52.665	46.91	203.822	9.27	85.935	0	9.056	3.403	13.975	12.546	16.003	13.926	4.606	230.756	5.366	3.963	12.166	5.523	37.405	2888.87	5469.79	10.361	89.134	6.75783	6.72186
1494	633524	39	2488.96	2455.05	2977.57	118.121	33.692	7.796	12.61	0	0	9.88	7.879	28.433	11.843	106.02	11.519	30.169	2.692	47.731	10.011	12.57	8.129	11.318	62.055	0	601.555	24.588	21.735	7.406	52.557	62.573	5475.63	9912.89	36.135	61.238	20.6643	2.37947
1495	633935	14	1308.89	1400.15	1535.35	154.81	61.103	5.363	34.572	0	0	7.167	8.122	30.732	4.694	102.332	25.929	8.717	3.543	22.222	42.251	13.866	3.091	91.365	23.008	10.582	624.85	29.715	14.464	3.132	245.908	285.048	4050.94	7925.27	13.214	50.622	16.0786	4.31391
1496	633954	22	5158.57	5272.05	5878.12	230.398	27.863	20.273	4.731	0	0	13.827	0.597	0	6.878	888.982	0	0.088	0	6.644	9.628	128.965	3.41	115.12	41.54	0	1306.75	15.942	1.32	6.258	0	55.848	1865.05	3636.63	5.148	90.436	-5.5099	-11.4064
1497	634374	24	3538.79	3710.87	4008.5	132.364	36.609	30.557	18.773	0	0	20.951	17.56	89.319	31.112	336.223	24.632	25.868	1.206	93.496	23.555	14.027	3.944	17.812	144.201	3.108	1030.17	58.433	32.744	6.085	27.618	274.351	5420.42	9523	21.529	125.359	26.8913	-6.57634
1498	634487	21	1985.5	2053.48	2507.12	148.362	60.198	43.846	26.344	0	1.707	13.515	20.296	96.275	51.33	405.698	127.751	19.344	4.486	92.569	33.952	10.618	22.447	122.735	93.766	23.2	1153.48	80.864	6.968	10.737	460.486	1414.55	6254.32	11131.4	8.769	55.627	26.8113	-6.81171
1499	634578	14	2573.43	2303.27	2687.19	405.191	40.752	255.226	1.448	0	0	5.872	2.238	0.601	1.465	86.668	7.06	17.341	0.928	32.43	21.731	3.228	6.941	8.896	69.45	1.345	596.379	18.188	6.776	0	13.372	22.613	3433.57	6246.85	5.049	27.775	11.4681	10.5206
1500	634774	20	6742.93	7176.94	7662.2	326.932	71.332	22.971	0	0	0.469	9.074	1.604	643.882	0.018	12.342	0.614	0.941	1.04	18.305	2.417	3.138	2.023	0	43.444	2.976	512.298	27.541	1.22	0	5.705	7.33	3700.29	6435.92	14.346	12.613	-12.4654	10.0024
1501	634794	15	2485.37	2232.72	2823.07	165.076	33.967	56.012	55.006	0	0	0	31.162	48.597	23.98	218.342	56.724	19.752	5.242	62.878	26.807	14.088	7.596	197.452	50.82	13.997	1014.84	63.541	4.015	13.294	363.027	347.213	5487.4	10108.5	19.853	36.544	23.1075	-1.4215
1502	634974	38	1288.62	1218.58	1292.85	72.699	8.08	15.118	21.703	0	0	0	16.399	47.018	14.993	118.606	12.002	11.762	1.759	29.019	15.206	4.551	5.802	11.447	50.658	0.949	349.458	16.325	6.521	1.473	23.285	93.113	2729.75	4726.25	5.558	40.72	17.0111	11.0445
1503	635286	16	1080.53	1004.97	1287.27	144.34	14.951	21.689	5.403	0	0	2.127	5.686	13.576	9.331	57.026	3.672	5.389	8.067	16.11	6.231	0	4.034	20.455	17.818	0	243.954	10.35	2.257	0	50.525	130.874	1753.12	3180.88	8.902	35.585	8.21955	20.9397
1504	635443	15	1738.55	1742.07	1961.29	171.277	23.997	75.982	4.313	0	0	0.21	22.51	33.972	16.816	179.136	10.545	11.776	0.768	29.655	25.148	12.961	2.789	21.254	20.971	2.067	338.956	9.577	0.903	4.876	30.481	682.03	2758.94	5139.32	21.298	32.363	12.5896	4.33267
1505	635640	16	1254.07	1307.18	1372.08	90.675	28.841	3.523	33.888	0	0	0	0.421	6.24	6.527	71.97	24.324	15.325	0	18.975	15.386	5.444	0.235	38.342	32.91	0	278.783	27.078	6.483	4.791	76.83	98.942	2221.11	3677.78	5.712	32.345	11.2974	11.469
1506	635687	20	1123.26	1130.32	1292.72	117.145	43.76	18.055	19.68	1.958	0	0.546	11.887	32.901	20.787	147.593	19.14	7.958	3.119	31.983	22.423	11.29	0.198	8.246	56.01	7.77	496.24	33.159	0.992	6.706	67.036	207.805	2916.58	5135.42	20.168	26.853	20.2387	1.64671
1507	635693	54	2332.4	2418.75	2679.32	104.454	68.165	25.239	27.05	0	0	7.838	10.953	30.991	12.82	65.284	23.286	19.703	0	38.332	40.116	30.845	6.835	9.773	54.025	0	464.724	18.615	6.303	16.824	95.183	255.479	3345.32	5951.35	32.577	64.737	16.289	1.1269
1508	636044	30	3163.31	3080.26	3707.22	146.929	54.405	66.679	31.199	0	0	3.299	10.827	64.673	37.436	266.629	75.049	29.532	0.341	62.622	49.92	15.282	12.654	414.073	122.661	9.647	1005.03	54.688	52.546	9.845	744.085	1396.79	6427.13	11817.7	14.386	52.946	26.8649	-5.14289
1509	636350	38	4298.15	4493.68	4912.81	157.134	40.07	30.525	18.247	0	0	37.905	24.529	28.827	15.785	208.426	27.481	9.477	0	75.411	21.372	15.883	2.838	6.365	103.637	0	761.179	42.762	16.142	9.92	22.65	148.868	5634.3	10553.8	12.872	87.151	23.8771	0.135593
1510	636536	20	5208.54	5672.51	6405.26	205.495	55.394	18.253	1.737	0	0.627	25.929	1.374	601.075	7.312	12.004	0.671	0	0.289	16.142	2.774	4.675	4.117	2.446	6.403	0	98.666	2.313	0	0	1.364	10.118	2537.93	4942.5	5.452	31.486	-21.8992	14.048
1511	636563	20	1754.35	1839.16	2296.43	112.777	41.196	33.773	6.874	0	0	19.498	15.685	14.261	3.749	65.953	11.721	6.944	0	28.988	23.764	6.618	0	20.229	36.75	0	306.538	16.255	0.649	0	49.657	39.411	1970.54	3730.78	24.135	71.129	16.6632	6.67072
1512	636796	19	14638.2	14939.5	16085	1012.28	228.574	22.266	0	0	0	2.794	0	1182.56	10.305	9.736	2.971	10.133	0	10.062	1.819	12.058	0.357	9.412	52.916	4.003	269.902	1.395	4.439	1.809	15.655	1.642	5669.57	10433.7	8.299	40.25	-17.087	8.85867
1513	637012	19	2248.79	2111.51	2491.26	252.751	52.842	16.366	31.846	0	0	19.899	28.496	68.165	10.391	334.516	44.001	12.318	0.407	63.271	37.065	14.212	12.971	25.461	49.304	0	693.049	34.574	3.863	11.325	35.114	65.303	4849.02	8762.13	18.64	91.802	22.2533	-3.2909
1514	637013	80	3745.82	3616.66	4233.02	161.865	65.353	50.221	44.798	0	1.591	4.042	34.354	164.407	52.891	517.687	142.337	33.383	10.775	92.971	64.19	58.187	18.266	76.106	128.158	7.091	704.22	49.171	26.164	46.554	154.044	217.042	4877.33	8097.19	44.879	114.53	25.3489	-8.96712
1515	637166	13	2294.77	2495.41	2730.69	126.973	15.366	54.146	0	0	0	34.809	0	297.185	0.087	27.272	2.044	0	3.23	2.065	0.707	0	0	0.772	3.953	0	54.433	6.856	0	0	0	0	1583.7	2498.42	8.9	22.093	-22.7635	16.2878
1516	637656	45	1790.1	1738.1	1982.02	80.058	21.932	13.566	6.082	0	0	12.699	27.68	60.306	38.25	174.917	35.465	24.964	4.888	29.218	31.86	14.391	16.311	24.076	74.263	0	259.205	28.248	25.965	26.068	48.56	33.628	2346.04	4022.52	14.522	95.472	22.9219	5.67893
1517	638152	37	1499.21	1629.26	1611.76	57.92	24.56	19.198	7.287	0	0	4.055	14.495	54.797	26.183	85.908	28.239	7.692	6.574	31.197	22.232	10.502	17.419	22.998	51.533	14.089	300.982	23.662	10.377	9.98	46.183	41.239	2246.85	4196.88	23.706	25.455	16.9659	9.95998
1518	638327	35	9110.42	9022.76	10418.2	394.412	68.954	14.718	1.553	0	0	0	3.054	1.01	9.767	4113.29	5.937	0	0	9.752	9.682	283.393	1.881	0	8.839	1.44	601.085	0.405	2.071	1.847	0	10.975	3172.13	6138.07	10.228	178.998	-6.04126	-5.92605
1519	638360	56	2559.16	2450.07	2769.08	118.567	36.587	14.196	14.305	0	0	26.382	48.038	66.64	98.979	370.979	57.409	15.66	2.537	61.71	41.861	32.861	36.6	29.485	71.364	27.903	731.73	59.179	21.063	35.684	104.147	125.508	4536.75	7786.02	35.156	1208.04	22.8508	-5.0589
1520	638439	38	10549.6	10820	11700.3	360.541	90.904	22.676	6.004	0.719	0	3.42	4.168	5.869	5.988	546.245	0	1.538	3.843	29.552	0	27.37	36.931	651.461	96.24	3.431	743.618	20.971	1.518	0.924	3.973	14.584	4980.9	8839.62	7.936	260.707	8.60349	-20.3094
1521	638453	57	8999.48	8993.29	9906.51	397.094	95.094	33.297	0.44	5.761	1.558	0	5.128	592.964	7.912	3.104	12.183	9.659	0	15.208	6.987	16.644	11.501	13.836	3.209	1.407	159.523	6.185	2.549	6.554	0	26.934	3557.57	6518.13	28.805	220.013	-17.197	10.8988
1522	641507	20	6162.02	6062.44	6810.64	295.023	55.471	21.674	0	0	0	2.066	4.02	7.654	7.703	2312.66	8.838	0	0.466	11.465	3	48.089	12.387	5.613	15.909	4.249	389.036	3.429	2.598	1.027	8.288	85.72	3086.13	5770.79	0	713.92	-3.97838	-0.297125
1523	641722	35	6893.72	7138.57	7489.46	277.562	63.138	14.989	3.25	0.114	0	0	6.809	0.728	0.945	2041.44	4.07	0	0	18.541	13.349	308.48	0	0.008	38.327	7.802	5981.33	1.667	0	0	2.863	0	3081.89	4766.67	3.503	333.979	-13.557	-11.641
1524	642596	26	1199.77	1201.25	1512.53	62.473	22.216	20.302	0	0	0	0	10.053	39.183	0	0.168	1.515	0	0	0	0.709	1.527	0	2.492	0.196	0	36.857	0	0	0	2.19	0.452	394.706	675.554	0	337.772	-16.8052	17.7868
1525	668124	38	2850.44	2797.69	3077.57	92.337	34.947	9.005	6.12	3.704	0	0	14.622	14.622	6.709	23.025	2.317	7.799	0	36.478	5.064	2.686	0	0.309	44.733	2.104	269.171	14.248	8.647	0.854	27.909	11.017	2596.3	4253.35	50.289	83.097	13.4383	21.2182
1526	672100	34	1078.99	1225.55	1326.23	46.945	15.897	8.54	3.391	0	0	0	2.596	28.289	12.935	15.807	4.302	0.428	1.387	19.199	7.1	0	0	5.624	35.736	0.403	235.128	10.249	6.457	0	4.575	0	1662.37	3023.7	36.972	71.063	9.44542	19.3711
1527	672194	50	1522.18	1325.41	1547.25	86.746	26.086	19.741	33.285	0	0	0	6.057	19.711	11.65	74.956	10.54	7.668	0	14.009	3.75	2.892	2.711	14.196	48.192	10.48	363.853	12.432	10.459	1.675	21.644	25.826	1555.61	2764.44	2.575	42.293	15.0692	15.8775
1528	674905	40	2940.93	3138.88	3385.33	136.729	45.194	12.066	1.72	0.156	0	41.52	11.196	281.469	4.087	17.508	7.304	11.04	3.799	5.062	8.528	14.233	1.727	0	13.596	0	64.507	0	3.303	0	0	7.291	1549.2	2395.99	14.832	41.806	-20.2873	11.6254
1529	674923	41	2491.39	2511.57	2715.95	117.392	47.517	10.181	8.103	0	0	10.361	9.764	31.125	12.372	32.341	5.888	10.032	0	34.581	6.553	29.607	7.708	0	60.671	0.946	263.191	30.384	8.245	6.697	27.066	18.573	2409.8	4133.19	17.244	57.317	11.9628	7.84077
1530	675578	53	1217.46	1374.49	1552.96	78.925	29.971	27.735	27.221	0	0	0	13.72	33.89	29.111	88.008	8.801	21.44	0.524	27.816	25.594	9.481	1.793	29.49	27.85	12.002	384.086	33.88	22.363	2.809	89.054	126.401	2583.6	5162.96	7.28	95.702	17.7589	4.46646
1531	678358	34	2124.66	2042.6	2204.36	70.163	25.568	19.027	5.595	6.047	0	1.382	9.84	14.235	12.889	22.247	7.172	9.935	1.318	8.556	37.458	11.431	4.023	4.547	54.227	0.793	309.408	14.05	0	12.662	6.575	580.027	1775.97	3303.5	23.536	16.873	8.41615	11.0076
1532	678399	30	1616.78	1440.2	1732.82	41.062	13.331	7.956	7.607	0	0	0	9.512	35.536	1.843	29.137	5.399	4.223	0	5.587	19.535	3.605	0	6.294	21.238	0	192.208	17.091	2.291	4.647	15.452	5.077	1767.84	3148	28.747	25.659	5.49611	17.3869
1533	679147	34	1042.6	981.102	1169.99	61.602	18.674	16.839	19.129	0	0	9.516	10.402	57.589	28.163	138.33	28.605	5.304	5.467	45.476	27.331	12.549	9.084	20.346	33.414	2.874	487.618	31.275	24.07	3.137	20.098	55.186	2852.72	4988.27	19.724	159.673	20.4149	-0.135191
1534	679720	53	1199.33	1115.29	1299.64	73.756	37.01	12.8	9.197	0	0	0	6.535	19.439	14.233	26.035	17.692	5.257	0	27.626	15.155	2.697	2.055	1.79	9.339	0	293.34	23.634	0	0	3.802	6.518	2125.92	3353.83	19.024	103.503	8.53139	16.1075
1535	683659	79	940.634	910.326	1075.59	33.472	11.585	5.601	11.163	1.296	0	13.632	8.57	11.483	4.328	27.925	10.212	8.041	1.068	27.049	19.679	11.694	0	0.629	19.796	9.122	174.123	4.637	12.111	4.506	11.078	2.623	992.687	1767.16	40.029	10.462	3.42419	12.0308
1536	683852	34	1243.56	1319.03	1379.59	61.366	27.1	7.404	5.867	0	0	0	2.783	14.524	20.909	23.661	3.476	2.644	3.584	13.573	4.049	0	2.551	6.563	22.451	0	175.906	25.238	0	1.478	19.54	54.338	1717.77	3044.88	5.258	56.618	6.56016	21.0377
1537	684822	57	1204.91	1224.45	1353.35	60.455	22.304	12.54	10.381	0	0	0	17.371	19.046	13.15	62.342	198.891	0	6.186	30.962	14.24	1.328	0	9.306	44.346	4.162	189.122	34.748	3.557	0	16.717	36.377	1570.6	2768.91	55.489	54.293	17.447	19.3787
1538	684975	38	1568.99	1717.49	1892.68	83.344	22.259	4.006	7.111	0	0	0.015	7.449	14.649	7.769	44.085	5.958	6.58	0	31.206	12.289	0.872	0.224	0	34.223	0.15	186.448	19.944	5.466	9.511	10.617	8.062	1703.31	2734.37	32.102	94.882	15.2267	20.9367
1539	686471	32	1914.27	1924.42	2164.67	101.498	24.479	11.055	6.288	1.076	0	5.445	3.508	19.273	11.2	21.772	15.397	0	1.899	14.816	27.704	5.063	4.016	9.944	31.184	5.189	271.568	13.61	8.63	11.964	26.359	12.179	1981.95	3595.34	47.138	38.322	9.09933	14.7237
1540	688746	36	1405.71	1389.17	1396.4	47.881	21.058	11.451	5.728	0	0	0	9.428	14.417	20.825	55.472	16.435	9.75	0	19.046	10.421	6.661	2.991	4.375	17.084	0.162	216.4	33.17	0.916	9.659	4.774	2.522	1398.04	2780.71	23.615	126.288	11.6361	12.7589
1541	689552	49	1254.44	1266.81	1435.93	75.081	33.099	22.603	2.279	0	0	6.688	10.728	13.742	6.025	37.449	5.79	0.806	0.782	19.729	14.345	3.276	0.96	6.505	13.099	16.929	227.736	18.164	1.39	0	12.179	8.671	1005.07	1955.66	11.356	54.644	5.23309	16.9685
1542	689762	41	2681.24	2674.83	3139.54	94.101	30.646	16.928	0	0	0.629	23.736	4.657	0	5.662	320.485	4.392	0	1.443	12.143	2.334	9.67	0	0	5.809	0	64.517	2.345	0.788	0	6.824	0.582	1385.27	2454.6	15.786	14.952	-0.00654369	4.42403
1543	692679	45	1902.24	1837.55	2045.66	98.055	25.319	4.878	0.196	2.783	0	0.908	7.264	41.312	4.417	32.665	12.272	0	1.354	31.024	35.814	0	1.253	6.402	84.29	0	230.309	33.722	4.339	12.731	6.541	24.875	1242.42	2373.75	35.93	101.499	20.5453	17.9932
1544	693440	58	1797.81	1828.29	2034.15	109.243	33.792	17.11	19.473	0	0	0	79.815	72.095	51.24	116.534	23.103	24.15	12.062	21.271	35.355	22.48	10.476	23.696	27.149	4.078	215.961	25.133	19.252	9.289	19.369	27.539	2177.47	3971.84	54.618	93.604	14.424	7.73412
1545	693741	39	1291.12	1410.71	1591.2	70.523	24.105	12.026	6.11	0	0	0	14.02	13.331	2.415	45.409	0.576	0	0	32.411	12.062	0	0.641	3.508	28.893	1.628	228.667	23.277	0	0.818	7.598	61.365	1338.53	2208.73	1.882	67.925	15.7115	20.7231
1546	695866	38	605.296	622.302	783.096	56.809	19.22	4.753	14.979	0	0	4.945	10.134	13.484	12.25	73.903	17.104	0	1.861	6.268	0.285	0	2.157	0	0.616	6.38	171.026	18.202	4.342	6.622	4.375	10.955	689.811	1330.47	2.586	33.633	-2.1113	20.3711
1547	699300	33	2056.35	2194.05	2447.66	141.805	37.975	25.876	7.799	1.49	0	0	11.556	26.493	8.652	30.638	8.58	12.47	3.606	43.431	23.228	46.175	3.385	5.151	50.535	5.756	428.625	26.824	6.664	7.587	28.199	21.168	2399.4	4122.17	60.897	29.672	15.0617	0.925448
1548	700949	30	676.037	767.501	712.246	34.421	18.529	2.728	3.504	0	0.845	0	6.05	13.945	7.882	40.844	2.939	0	0	17.08	9.695	1.241	0	5.398	10.118	5.401	137.599	8.563	6.531	3.929	10.023	7.226	1144.66	2160.13	25.972	60.776	-2.39989	19.134
1549	701680	33	955.072	988.292	1113.28	46.835	18.662	4.962	6.779	0	0	0	8.654	10.819	9.468	41.248	18.737	6.603	0	16.963	26.349	1.934	2.651	8.924	13.511	4.264	228.448	13.423	3.558	9.663	12.163	22.365	1180.21	1996.58	28.216	32.519	4.6659	17.7194
1550	701936	49	1407.96	1298.83	1490.65	50.712	20.827	8.995	8.612	0	0	2.745	9.287	20.731	15.477	21.852	14.924	1.99	0.236	32.179	17.846	0	0	9.852	43.749	0.74	268.793	17.5	0	0	13.506	3.386	1093.62	1921.96	35.389	18.336	14.1778	21.0152
1551	702663	42	3144.29	3226.3	3682.29	162.266	94.164	34.614	30.271	0	0	23.81	9.012	64.173	22.085	186.948	42.947	10.135	2.613	100.847	67.363	6.474	21.777	314.804	174.879	8.183	1352.92	84.635	13.615	16.695	566.503	1064.84	6447.58	11915.7	25.063	6.739	31.1556	2.57834
1552	704602	41	1652.42	1506.01	1758.08	62.411	37.622	17.847	19.79	3.308	0	3.325	7.409	30.66	10.942	40.335	7.552	0	1.345	51.703	15.098	7.658	5.96	11.768	64.614	8.887	260.004	23.584	5.698	2.483	9.837	21.255	1910.81	3820.31	20.017	42.479	19.1106	10.141
1553	710441	42	2103.08	2074.15	2295.73	106.194	25.709	9.313	0.122	0	1.015	0	14.123	21.612	2.574	46.415	5.683	0	0	37.797	3.031	2.065	0	3.201	75.717	2.324	406.624	30.869	4.423	0	1.101	0	2581.02	4496.43	26.894	40.149	21.3252	17.0056
1554	710584	40	991.838	963.868	1270.43	68.821	14.428	14.537	3.544	3.844	0	11.478	7.907	2.564	10.781	16.628	2.934	1.127	0	33.96	12.769	0	0.662	0	16.086	6.296	137.295	8.648	2.838	6.085	11.073	4.111	1275.68	2120.99	7.393	31.922	0.57277	29.9427
1555	711515	54	1996.45	1959.45	2240.22	83.997	34.799	12.182	0	0	0	29.855	3.09	7.777	2.769	22.599	0.772	1.127	0	5.761	9.831	16.366	4.026	3.128	13.093	1.833	82.373	1.715	0.058	4.746	0	5.816	935.643	1656.16	13.343	43.322	-5.07977	11.2098
1556	711988	37	1957.13	2034.21	2460.32	161.104	23.003	12.258	21.254	0.259	0	0	62.237	16.549	14.619	120.862	39.71	5.139	2.814	68.208	67.944	0.651	7.598	69.116	47.279	0.609	560.536	68.186	1.751	10.558	220.241	379.605	3110.27	5465.66	27.817	76.488	27.6561	11.4874
1557	712059	41	1084.61	968.58	1188.4	33.251	16.236	8.952	6.739	0	0.47	3.152	12.587	28.483	13.159	35.667	20.204	8.743	0	27.836	9.349	2.942	9.943	0	21.314	0	142.036	5.81	1.299	3.61	3.192	4.65	709.388	1420.77	30.486	69.887	8.30975	17.3149
1558	713546	40	2703.85	2845.46	3301.4	134.223	32.079	11.717	0	0	0	24.257	4.903	417.918	7.568	19.917	3.324	5.774	0	3.073	1.078	0	0	2.944	9.038	0	57.956	11.259	0	0	7.087	8.646	715.329	1331.61	7.811	98.419	-24.6962	13.7272
1559	715893	57	1986.8	2071.54	2031.16	87.541	42.079	23.988	4.623	0	0.201	0	7.223	20.15	13.88	40.207	10.884	10.45	0.09	20.454	12.872	0	10.853	6.637	19.873	2.207	289.911	20.688	4.503	0.55	6.642	9.623	1881.58	3196.01	45.222	45.326	10.1974	20.6755
1560	716166	56	1713.61	1578.92	1982.43	56.98	253.805	19.974	5.824	6.261	2.573	22.81	4.84	28.155	12.272	27.861	4.637	5.226	0	36.628	8.645	7.46	6.407	2.323	6.56	0.681	329.99	20.718	0	0.955	3.517	8.928	1698.39	3130.71	37.592	80.868	8.70498	15.741
1561	716579	37	1154.3	1142.26	1254.53	44.418	19.501	18.189	2.926	6.409	0	0	12.994	19.572	20.844	60.447	21.106	3.107	0	25.43	3.691	8.003	5.128	9.26	34.918	3.24	219.368	21.891	4.077	1.815	5.997	20.208	1321.19	2409.51	11.92	67.422	13.9662	11.0695
1562	718094	28	1132.12	1210.18	1449.81	68.343	28.986	21.37	1.056	0	0	13.749	18.783	26.535	20.651	39.921	3.98	0	0	36.331	13.223	0	3.78	8.196	91.686	12.154	470.821	29.363	10.599	0	3.483	1.99	2027.97	3755.52	3.66	86.722	21.4961	17.6956
1563	719326	35	1521.7	1553.43	1777.56	56.439	29.958	11.039	7.379	0	0	0	2.612	16.841	10.259	37.143	4.527	2.369	0	17.857	16.73	0.474	1.662	0	8.084	0	252.564	22.593	1.691	0	22.419	19.458	2214.39	3574.22	26.465	58.583	8.77286	20.7224
1564	723028	41	964.729	959.134	1071.97	40.551	26.203	9.937	13.079	0	0	0.944	4.191	3.293	16.391	30.584	0.678	2.477	0	0.349	10.56	5.997	2.777	10.1	9.335	2.507	167.465	7.838	14.829	0	21.826	65.288	1368.39	2479.5	40.77	35.321	-5.86978	22.586
1565	724621	24	559.385	563.735	619.36	20.696	8.515	9.03	0.945	4.906	0	3.509	7.491	4.344	3.826	21.945	7.881	0	0	5.606	4.053	0	0	5.714	2.93	1.8	59.719	8.067	0	2.274	0.149	7.826	593.181	1175.79	0.79	0	-10.2628	20.6267
1566	724696	52	1494.53	1602.9	1637.14	56.987	33.312	0.054	0.514	0	0	0	8.627	33.581	6.222	16.323	9.475	0.339	0	14.008	14.397	11.209	4.805	0	35.608	0	170.234	13.799	4.698	0	13.245	13.32	1183.75	2091.4	79.043	68.679	7.85568	10.9342
1567	724886	48	1127.65	1093.53	1258.76	36.791	19.303	22.228	1.068	0	0	21.26	0	36.909	0.831	15.806	9.216	7.401	1.553	19.658	7.329	3.714	0.141	7.106	25.503	0	67.822	9.564	0	0	13.278	0	900.748	1751	19.143	61.533	6.96864	11.8669
1568	726167	36	1653.76	1477.38	1673.27	124.212	17.402	10.07	7.062	0	0	0	2.252	10.251	5.188	21.217	7.545	0	1.759	40.349	0	2.712	0	0	60.23	2.934	354.367	10.293	5.123	0	6.465	0	1999.54	3519.62	10.471	23.131	14.1092	22.2842
1569	726216	35	1559.61	1444.88	1624.92	77.226	20.369	10.375	1.449	1.852	0	0	19.239	4.271	7.321	60.805	5.004	2.652	0	26.475	15.548	0	0.175	2.671	45.583	0	238.716	21.854	4.965	1.543	8.459	7.889	2065.15	3620.83	23.484	78.065	11.8603	25.7571
1570	726859	34	3934.04	4183.27	4606.09	166.503	37.593	16.434	0	0	1.48	22.063	7.74	0	8.081	1180.62	8.654	0.651	1.864	25.342	9.704	45.602	9.541	15.777	46.209	1.296	617.091	1.188	5.111	0	3.227	55.487	1937.07	3778.18	10.018	75.428	-2.02313	-8.3478
1571	727056	36	1871.07	1681.93	1907.33	62.918	24.157	24.958	1.289	0	0.845	1.151	4.486	15.07	5.322	18.489	8.178	4.566	0	17.495	4.894	3.082	1.751	11.994	47.088	0.574	221.862	9.576	0	2.249	16.835	7.568	1488.54	2706.23	24.333	23.968	5.98832	17.0513
1572	727092	45	1095.26	1106.94	1361.32	60.229	15.618	20.44	2.415	0	0	0	7.746	12.945	8.838	26.617	18.416	4.292	0.713	9.198	3.57	4.489	0	1.935	8.026	0	133.867	10.081	8.171	0.593	12.729	13.482	1716.85	3203.02	29.614	1.874	-3.58526	13.5051
1573	727458	32	626.052	684.026	585.234	39.195	17.024	5.594	3.433	0	0	4.032	7.828	5.462	7.559	23.072	5.134	0	0	5.548	3.606	2.368	0	11.615	16.799	0	106.251	0.128	7.809	0	11.571	0	702.833	1208.14	2.205	87.018	-7.93308	24.144
1574	727753	48	1044.78	1143.41	1098.13	29	15.361	9.336	6.579	0	0	4.704	22.065	28.5	26.061	65.372	9.6	10.469	0	16.757	11.545	7.128	1.203	3.997	28.745	2.774	270.978	5.009	1.762	5.328	12.529	13.156	1456.09	2457.91	25.118	44.479	5.69403	12.4415
1575	729377	49	1085.21	1133.75	1244.53	65.555	25.85	1.465	4.677	3.531	0	0	6.072	8.185	1.916	9.906	0.754	0	0.162	2.653	0	4.189	4.606	1.033	0.426	0	61.922	4.719	10.119	0.528	0.947	0	390.234	856.502	47.028	79.161	-10.7417	19.3802
1576	731526	34	1410.03	1525.03	1590.74	90.412	13.61	8.14	8.067	0	0	0	13.181	20.035	24.977	38.774	21.044	3.59	2.622	21.269	10.674	6.708	5.02	0	25.245	8.581	329.136	13.524	0.855	13.802	35.135	44.257	1712.98	2952.32	7.536	22.161	13.4624	12.6226
1577	732658	53	1339.92	1276.69	1462.14	74.146	29.854	10.268	6.178	0	0	2.01	4.125	11.233	15.932	13.663	12.364	4.07	4.571	61.41	16.934	1.048	0	3.992	29.568	0.396	275.939	36.812	0	0	24.517	14.711	1420.19	2517.17	26.202	105.791	17.4941	22.7488
1578	732844	34	1060.97	1285.24	1242.39	42.316	24.62	13.929	0	0	0	2.458	9.607	12.061	17.084	19.691	3.658	22.415	0	17.631	28.695	2.973	0.542	2.854	51.108	0	146.705	11.087	0	0	17.993	10.413	1437.77	2545.41	10.492	53.135	7.73917	19.6227
1579	733585	59	1480.94	1400.36	1517	71.534	20.1	12.809	1.2	0	2.79	8.284	13.772	11.036	0	17.49	0	1.568	4.401	19.276	0	0	4.64	6.238	7.506	0	255.386	18.809	0	1.972	0	2.84	1033.38	1877.2	62.416	21.503	-2.12845	19.3005
1580	733641	45	2284.17	2423.21	2732.47	88.422	38.983	15.033	28.188	0	6.112	34.065	37.608	25.06	21.347	141.615	30.726	18.532	0.844	52.197	33.555	17.428	0.283	37.817	60.567	0	715.983	29.61	19.961	6.606	77.049	23.608	4728.12	8774.86	14.057	51.224	22.0139	1.41054
1581	733857	47	638.239	679.857	666.293	45.521	23.406	21.321	15.2	0	0	12.73	6.691	23.1	14.292	58.862	18.605	0	0	14.024	0	0	0	5.687	21.808	3.686	251.829	14.789	11.596	18.231	9.236	8.171	1155.89	2067.92	23.141	68.875	11.7571	18.1691
1582	735413	48	1752	1801.71	1975.96	144.003	38.295	23.772	3.773	0	0	0	3.405	22.533	9.044	40.787	7.118	10.96	0.575	50.061	25.075	5.872	0.268	3.973	70.116	0	346.854	29.41	7.875	8.008	0	3.589	2526.13	4350.28	32.502	75.145	20.6241	10.7563
1583	737197	31	1700.38	1794.08	1908.46	89.828	24.237	10.312	8.682	1.275	0	5.508	17.803	14.256	3.598	51.676	7.699	1.739	0	36.348	15.817	0	1.78	0	30.606	1.868	288.93	10.474	0.758	2.127	15.291	4.887	2028.58	3400.28	0.923	82.677	12.6449	18.9974
1584	741722	91	491.791	484.793	538.653	31.023	32.05	12.314	17.203	2.319	0	0	20.401	20.55	5.558	33.975	6.057	4.749	8.629	7.606	11.95	48.967	4.462	3.319	31.124	0	283.614	25.431	4.376	0	22.049	18.177	1674.39	2964.65	30.411	23.587	4.165	8.40834
1585	742802	42	518.848	449.677	609.585	35.417	9.094	8.684	0	2.706	0.947	48.617	13.537	5.996	12.388	20.398	4.233	0	0	0	0	0	1.651	7.226	15.058	0	124.455	5.35	1.566	0	4.691	0	707.357	1400.56	79.178	106.588	-7.95941	24.4551
1586	744165	42	376.58	343.786	366.04	19.44	16.83	9.016	1.13	5.19	3.302	0	0.76	8.688	12.226	8.358	0.074	0	0	25.998	42.108	0	0	4.621	56.958	1.626	105.604	8.607	11.198	0	9.932	0	647.251	1073.43	13.74	0	-1.16828	31.3734
1587	744193	54	2424.61	2339.96	2683.44	111.119	35.25	12.244	0	0.554	0	55.13	17.307	2.263	2.112	17.174	1.287	0	2.081	3.723	0	4.361	2.782	0	13.86	2.869	69.166	8.635	7.203	0	0	0	844.254	1576.2	4.919	54.456	-5.68725	23.47
1588	744368	24	820.341	797.254	875.917	18.422	20.797	7.985	3.718	0.386	0	7.87	10.486	4.874	4.688	29.093	4.047	0.965	1.578	14.225	12.055	0	0	5.623	1.725	0.05	55.053	0	0	0	0.562	1.241	789.354	1277.47	20.943	0	-10.3072	21.0644
1589	745846	34	1026	918.913	1044.58	45.145	26.367	6.499	7.068	0	0	0	4.525	5.942	1.465	46.972	2.099	3.636	7.022	5.692	0.828	0	0.43	5.87	26.948	2.632	108.036	6.807	3.661	3.339	26.944	3.231	1309.35	2081.78	18.533	40.612	-0.987961	23.187
1590	745966	37	1698.9	1781.62	2035.34	82.524	30.66	24.414	0.082	0	0	0	8.465	11.37	6.065	27.476	0.645	4.338	0	7.867	4.473	0	0.157	1.558	15.135	0	180.426	7.018	6.503	1.921	1.914	0	1338.59	2341.47	63.315	41.076	-2.05881	17.4252
1591	746288	30	824.066	883.259	972.747	47.988	18.712	13.644	16.614	0	0	0	12.882	6.7	14.185	27.87	18.531	0	1.429	9.959	16.458	10.383	5.682	12.333	24.236	1.379	207.506	6.986	7.423	0	46.525	70.175	1546.64	2663.44	4.6	58.685	1.051	12.8361
1592	746624	49	1784.59	1681.28	2105.85	75.486	41.086	20.232	14.751	0	0	0	10.442	37.121	20.141	77.418	20.688	3.83	1.238	19.366	11.973	12.24	4.855	0	24.38	11.214	386.477	24.501	0.47	6.162	129.491	49.495	2602.44	4641.63	30.088	61.167	14.4454	5.28845
1593	747438	45	2242.58	2340.61	2559.5	132.786	39.813	27.36	4.591	0	0	0	17.831	16.595	7.188	54.864	16.482	5.493	7.527	49.165	15.47	22.381	1.16	4.181	87.488	10.103	453.374	18.156	6.201	6.056	9.582	12.549	2546.12	4489.85	51.659	91.716	17.0904	2.03693
1594	749235	29	1129.95	1189.79	1360.15	55.896	18.953	11.559	5.821	0	0	0	3.324	3.622	4.629	17.229	7.15	10.4	0	20.229	6.002	0	4.958	1.832	37.335	1.329	262.785	22.709	1.979	2.268	17.175	0	1537.58	2855.79	15.809	25.592	8.32384	26.2216
1595	750483	40	2262.91	2195.08	2601.34	75.977	23.585	14.686	10.094	0	0	0	21.542	8.643	26.902	36.414	7.232	14.917	5.149	28.078	13.821	2.178	0	9.936	11.287	2.449	322.135	18.374	2.105	0	21.247	11.824	2091.52	3870.75	10.36	24.98	9.2874	22.8326
1596	750571	73	1765.41	1810.08	1932.09	102.741	33.12	20.031	13.983	2.485	0	32.746	19.082	33.438	15.684	20.118	15.43	6.002	3.555	34.322	14.388	3.387	12.579	7.941	41.856	0	368.579	18.16	18.923	0	8.656	21.846	1522.93	2797.64	23.922	73.043	16.7228	15.2828
1597	750995	36	2422.11	2241.61	2732.43	117.687	20.935	20.255	4.748	0	0	0.666	30.808	35.737	14.615	39.092	15.962	14.025	3.905	46.21	0.244	9.863	2.39	3.958	54.95	0	279.575	35.138	1.798	0	21.051	7.125	2352.17	4086.78	38.47	59.134	19.3678	9.52205
1598	751264	27	677.817	669.156	726.927	28.654	8.819	11.924	7.747	0	0	1.077	17.401	19.225	30.434	70.346	33.885	7.361	0	9.68	24.95	8.053	14.73	14.297	7.462	0	76.282	18.9	6.498	16.09	29.551	18.116	737.438	1422.97	2.677	38.645	-2.33474	12.465
1599	751792	48	1290.49	1234.09	1501.95	56.506	23.421	2.621	3.436	0	0	5.484	16.206	17.288	16.336	37.537	11.083	1.836	0	14.669	2.648	4.402	4.984	0	35.928	0.511	175.001	9.003	0	0.721	3.78	7.179	1320.57	2542.03	7.895	56.955	6.22875	13.8806
1600	752390	51	1662.58	1556.36	1822.59	107.137	28.96	17.985	0.503	0	0	7.884	2.297	33.852	7.757	55.164	0.439	9.58	0	24.144	14.934	0	0.442	3.396	23.505	6.343	248.101	17.824	8.141	3.761	50.926	7.098	1173.35	1960.67	74.126	67.172	13.5978	18.1939
1601	752728	64	551.226	662.767	591.01	49.354	7.027	7.407	0	0	0	0	4.509	8.438	3.949	43.557	12.247	0	2.052	8.135	12.523	0	0	0	18.692	0	90.7	12.588	0.636	0	10.292	3.586	405.748	745.346	14.242	0	0.072817	19.2254
1602	752795	60	3308.43	2990.75	3340.81	138.741	22.8	28.501	0.827	0	0	40.464	13.853	2.167	4.923	29.09	1.033	0.918	0	3.854	6.921	3.241	3.372	0	9.313	0	72.713	2.73	0	0	0.701	8.734	881.735	1678.46	9.1	29.687	-8.16271	23.4162
1603	755016	46	1487.58	1484.63	1839.03	92.694	60.144	27.47	24.242	0	7.116	9.039	20.747	49.097	45.324	92.563	13.441	20.266	7.772	77.865	37.321	5.606	14.544	13.775	137.868	15.28	673.813	39.952	1.055	11.738	110.877	251.371	3089.79	5625.08	13.043	81.184	28.188	5.11782
1604	755869	36	1496.9	1618.71	1873.53	92.992	41.789	8.044	0.357	0	0	0	18.413	22.949	24.163	56.755	34.997	2.997	0	44.379	25.153	2.645	10.008	3.322	74.506	0	287.188	50.485	9.714	0	24.536	26.751	2486.9	4987.99	44.298	43.553	23.2022	17.9359
1605	756958	35	647.77	661.297	774.785	43.077	27.035	7.535	10	0	0	0	20.16	85.807	57.094	265.166	57.661	19.937	4.781	9.612	30.677	22.45	6.753	12.776	9.064	7.855	177.411	5.306	23.506	35.435	38.736	22.579	808.378	1322.67	10.028	47.041	-6.10149	2.86239
1606	757878	54	667.306	622.832	697.846	23.543	12.433	0	0	0	0	7.295	3.96	2.762	14.254	11.456	2.688	4.038	0	4.931	2.667	3.205	0	0	30.867	0	81.955	7.418	8.573	4.993	7.731	0.236	545.863	950.215	8.922	36.759	-4.23734	28.8615
1607	758323	52	1152.56	1064.33	1209.2	79.585	17.527	23.242	17.487	0	0.759	2.971	9.202	20.161	4.411	43.265	3.343	0	0	4.74	19.482	3.372	4.295	7.651	22.877	8.714	287.457	32.253	0	0.871	47.153	15.308	2122.7	3812.33	30.806	32.473	7.28309	14.2588
1608	758570	45	862.967	725.637	849.155	34.813	26.634	6.921	1.922	2.629	0	0	17.599	15.376	16.073	22.139	4	0	4.357	18.147	15.312	0	0	0	15.791	4.219	198.766	22.019	10.561	1.28	11.538	5.07	874.111	1635.5	18.568	21.273	7.36295	20.9085
1609	758948	27	519.366	515.539	565.766	47.511	21.918	7.551	7.72	0	1.415	2.723	18.123	15.977	13.585	64.296	5.489	0	0.123	14.94	2.311	0	0.693	3.092	9.488	0	161.809	18.635	0	6.37	21.006	2.293	1101.91	1867.62	15.606	54.028	7.24909	18.093
1610	759767	29	2565.78	2526.92	2917.19	131.623	44.918	10.857	22.307	0	0	25.123	31.891	76.223	42.455	314.707	26.498	10.537	2.08	36.053	21.925	16.995	15.227	16.939	30.282	17.919	565.834	42.579	10.642	19.139	33.096	92.45	2898.65	4938.77	34.564	125.991	20.9346	-3.21197
1611	761550	61	997.536	981.68	1126.12	58.921	19.575	1.335	0.53	3.118	0	9.159	7.034	17.699	9.834	30.481	23.872	10.511	0.617	2.528	4.335	9.158	0	9.598	17.146	0	117.476	1.998	9.975	3.683	5.562	10.092	563.126	1213.15	17.818	59.555	-4.97746	12.0913
1612	764171	28	310.787	343.499	326.738	18.366	7.593	0.265	0	0	0	0.97	9.676	8.309	10.547	25.983	14.514	0	0	6.624	11.399	0.156	6.859	0.249	16.063	1.179	81.295	10.136	7.395	0.326	2.495	1.905	770.813	1388.74	22.186	44.008	-4.1429	18.4162
1613	766492	28	1100.75	1220.26	1505.72	37.389	9.856	4.065	16.015	0	0	0	19.218	23.315	18.309	30.763	12.941	9.608	0	7.085	13.293	6.935	0	8.036	14.633	1.291	276.365	22.095	2.381	0.528	18.029	16.844	2173.03	3971.38	21.607	8.293	6.96293	13.5706
1614	766703	32	1592.94	1418.28	1669.05	222.993	18.336	121.597	10.893	7.776	0	10.282	17.337	22.983	16.207	46.36	12.382	4.006	0.005	18.584	8.527	4.824	2.351	4.973	40.55	1.206	306.851	21.564	31.172	3.977	11.452	6.992	1916.02	3462.13	25.55	84.4	14.6599	14.3965
1615	767322	59	974.755	1092.87	1340.56	68.707	38.567	12.987	6.114	0	0	0	7.027	12.161	0.547	16.525	0.466	1.368	5.644	9.608	18.832	0	0	3.776	21.715	3.859	175.087	2.882	0.294	3.48	17.95	11.006	1171.88	1817.17	37.869	49.041	-4.57966	15.6799
1616	767983	39	1398.79	1620.08	1710.78	101.668	34.249	14.158	7.261	0	0	8.075	17.1	24.108	23.351	57.751	1.415	0.066	0	8.909	22.092	1.486	7.926	7.091	47.963	2.355	299.936	22.045	0.903	2.276	28.031	339.185	1851.47	3517.48	13.204	69.894	15.7836	17.1649
1617	768755	36	2607.87	2794.37	3130.04	136.009	41.551	20.586	5.078	1.877	0	3.522	59.046	22.779	12.971	70.306	13.73	4.633	0	38.383	20.876	44.577	9.998	4.862	56.144	4.058	341.479	26.225	9.954	2.758	29.829	9.495	2861.99	5095.42	23.631	104.464	15.4328	1.07293
1618	769594	41	1231.36	1344.89	1510.99	89.509	35.067	14.389	22.024	0	0	14.085	26.191	51.252	18.584	53.975	395.422	7.6	4.363	39.142	23.3	2.465	7.273	5.522	42.94	7.674	323.219	38.826	6.568	9.493	41.166	30.528	2460.21	4500.49	30.735	85.125	20.466	14.4899
1619	769793	37	3698.76	3569.64	4001.64	178.84	40.305	18.014	16.601	0	0	0	21.131	17.568	19.912	63.177	69.145	8.88	6.557	63.762	53.899	12.009	9.251	200.266	91.451	8.939	657.129	50.145	17.438	1.129	203.891	57.691	5330.02	9593.78	18.228	56.958	23.621	3.12963
1620	771011	52	889.197	984.184	1118.11	37.796	30.484	7.935	3.392	0	0	3.505	5.701	3.003	21.521	12.734	0.742	0	0	6.886	0	0	3.754	8.228	15.719	0.869	114.44	11.774	4.718	0	3.589	0	603.13	1169.08	9.238	121.128	-2.06309	29.3264
1621	771808	40	1966.05	2015.16	2449.01	70.866	30.927	18.978	1.625	0	0	12.094	25.744	25.046	38.698	185.183	20.347	0.176	2.563	34.418	23.156	0	6.736	8.534	30.014	4.44	448.134	26.931	3.781	20.047	28.823	19.848	2851.12	5047.88	3.813	72.54	23.0527	14.5994
1622	771901	67	1219.38	1498.59	1648.77	66.202	26.034	15.521	5.898	0	0	24.699	36.383	25.602	23.3	70.086	19.705	7.736	5.411	23.442	12.718	5.901	0.213	14.592	29.521	4.428	371.779	16.818	0	10.623	8.436	60.798	1757.15	3226.33	5.225	94.132	14.9866	12.6223
1623	772387	36	2489.31	2609.06	2952.39	144.572	33.233	18.891	13.159	0	0	0	35.971	37.662	37.465	89.789	20.432	13.509	0	34.075	33.05	13.43	0	27.682	47.208	0	401.785	36.425	7.246	10.357	9.03	67.095	2313.34	4041.67	15.11	112.591	18.3099	3.16044
1624	773435	50	2313.43	2436.61	2757.23	106.149	41.57	21.921	0	0	0	6.149	14.279	15.367	9.946	19.133	19.127	10.521	0.949	20.277	11.695	0	15.031	5.129	45.414	3.257	198.189	28.782	7.468	0.505	13.514	2.623	2411.82	4132.38	35.789	112.281	12.2076	22.3819
1625	774461	49	988.827	861.245	1044.25	38.301	16.448	8.132	9.965	0	0	9.146	18.962	11.773	2.135	22.971	22.373	0	0	20.34	7.438	2.315	7.309	0	25.237	2.698	224.079	8.126	1.176	2.632	23.106	1.907	1374.1	2534.77	68.161	97.951	7.87262	19.7807
1626	775188	80	4982.81	5175.52	5485.36	212.771	85.95	35.663	1.722	3.282	0.164	22.237	6.085	25.745	9.382	1683.15	12.466	2.593	2.168	23.764	7.868	37.467	3.068	2.624	21.631	0	191.635	7.259	4.767	0.431	20.291	7.108	1339.12	2591.87	24.493	51.327	-5.45875	0.140296
1627	775573	44	1514.49	1589.55	1801.78	70.46	27.335	24.78	6.251	0	3.723	0	17.851	12.813	12.51	67.34	20.128	8.536	0.111	30.825	32.854	0	7.234	10.94	44.657	5.004	385.337	31.562	11.718	8.787	20.369	18.922	1561.7	2764.75	4.097	79.721	18.9976	20.3429
1628	776040	64	1253.77	1259.64	1468.45	104.66	37.497	27.358	7.608	0	1.915	19.075	14.497	23.386	8.17	33.241	46.604	10.379	3.416	30.113	19.449	5.933	9.343	15.253	19.485	7.639	144.332	6.876	6.797	9.517	12.003	11.58	1218.25	2274.61	9.607	33.127	7.66357	15.7218
1629	776711	45	848.484	928.756	1145.41	53.72	43.677	10.481	0.571	0	0	80.575	28.746	12.971	2.747	23.161	7.141	0	0	23.488	0.017	7.191	3.759	0.637	21.193	0	77.639	10.065	4.553	3.071	5.631	10.167	981.007	1487.54	43.593	68.19	3.8119	15.6527
1630	777174	26	555.567	547.999	651.479	24.199	7.269	0	6.463	0	0	2.028	18.151	13.287	21.611	29.538	10.457	6.562	0.005	2.158	19.862	1.083	0.798	5.281	8.165	3.077	106.798	7.199	8.687	0.584	13.507	8.601	601.647	1040.49	3.614	32.107	-7.95498	18.2218
1631	777216	36	1448.94	1640.53	1813.22	56.184	24.182	8.311	1.489	0	0	0	13.715	10.246	2.981	36.026	6.677	1.346	0	4.854	2.82	26.471	5.515	1.118	14.812	2.743	193.885	19.651	8.733	0	11.95	5.466	1115	2082.57	34.778	39.429	-0.0326186	11.0354
1632	777636	40	1835.39	1927.46	1992.52	120.042	27.228	28.942	11.17	0.998	0	7.664	19.721	28.162	17.958	104.594	13.051	8.147	0.551	41.355	15.076	17.334	9.286	18.683	87.14	5.074	322.604	26.781	13.376	12.284	42.076	7.905	3324.06	5827.99	20.972	115.251	18.9848	2.20998
1633	777777	46	920.577	839.664	863.529	52.154	18.053	0	5.408	0	0	0	10.878	8.585	17.377	15.005	2.941	1.611	0	1.132	17.515	6.693	0	10.848	23.127	0	113.206	5.733	1.844	3.992	12.425	8.622	622.394	1020.89	12.502	40.05	-5.23971	21.5886
1634	777966	37	2386.74	2381.93	2695.04	155.3	25.883	23.659	11.985	0	0	11.25	22.277	50.687	64.543	284.128	37.917	8.278	1.435	47.415	36.505	26.792	12.612	21.866	25.73	12.498	666.984	30.413	7.206	27.769	41.124	130.435	4260.84	7546.08	9.219	86.131	18.7057	-3.27397
1635	778074	35	2202.2	2158.27	2800.96	141.689	35.98	15.224	31.835	0	0	14.015	21.913	54.05	42.757	255.201	70.826	31.996	0	24.777	51.054	29.112	20.72	47.184	59.402	7.037	664.482	26.045	24.121	3.606	153.773	434.691	5104.81	9058.48	15.38	71.853	20.4619	-3.4639
1636	779090	34	615.644	566.111	644.959	45.583	7.652	2.828	1.993	0	0.264	0	5.038	7.099	0.505	8.97	3.778	1.266	0	13.987	4.323	2.367	0	3.074	0	0	41.282	3.505	0	6.926	0	0	528.949	872.375	22.772	47.345	-10.4652	19.1213
1637	779174	46	3215.67	3453.57	3911.01	150.193	38.597	36.312	35.25	0	0	0	43.672	55.634	33.818	318.105	33.983	17.423	12.72	51.338	22.846	14.689	25.782	46.994	64.606	1.205	859.435	46.118	15.878	15.994	197.004	510.917	5580.53	10505.6	21.454	98.878	22.9254	-2.2956
1638	780742	34	2676.63	2254.46	2889.19	122.465	40.023	15.053	21.002	0	0	21.55	47.323	201.904	136.3	773.681	85.046	39.589	7.914	80.033	56.856	65.416	24.314	86.601	69.1	10.389	997.208	44.377	44.324	29.935	169.449	752.576	4569.13	8209.45	12.137	343.68	24.8874	-9.29573
1639	780756	80	1910	1953.64	2157.47	112.257	55.444	23.736	24.727	5.08	1.14	0	48.112	88.582	70.986	280.823	94.906	28.517	11.195	56.728	51.481	42.958	52.065	43.37	52.21	30.995	463.783	19.839	26.189	100.04	81.897	89.111	2221.39	4481.97	26.247	106.266	21.6432	-5.55317
1640	781679	66	2351.24	2287.29	2545.43	165.446	56.974	25.432	24.701	8.979	0	16.366	20.292	15.69	21.704	117.369	287.205	42.1	15.597	69.595	62.156	8.899	18.38	254.697	54.337	16.525	772.843	50.459	20.664	18.666	486.813	229.762	5270.39	9254.53	16.619	985.61	22.9322	3.59144
[truncated: 8,033 more rows]

## Sheet: wt2
Filename: c02_FAPs 14_7_16_NORM_LD_viSNE.fcs
[truncated: 2,042 more rows]

## Sheet: wt3
Filename: c03_FAPs 14_7_16_NORM_LD_viSNE.fcs
[truncated: 1,533 more rows]

## Sheet: mdx1
Filename: c04_FAPs 14_7_16_NORM_LD_viSNE.fcs
[truncated: 12,989 more rows]

## Sheet: mdx2
Filename: c05_FAPs 14_7_16_NORM_LD_viSNE.fcs
[truncated: 12,054 more rows]

## Sheet: mdx3
Filename: c06_FAPs 14_7_16_NORM_LD_viSNE.fcs
[truncated: 15,815 more rows]

[truncated: 3 more sheets: ctx1, ctx2, ctx3]
