# Supplementary material for: Fibro-adipogenic progenitors of dystrophic mice are insensitive to NOTCH regulation of adipogenesis
Source: Life Sci Alliance. 2019 Jun 25;2(3):e201900437. doi: 10.26508/lsa.201900437 (PMC6599969; doi:10.26508/lsa.201900437)
Supplement: Supplementary file 2 [file LSA-2019-00437_TableS2.xlsx]

## Sheet: Sheet1
LFQ intensity CTX treated mice								LFQ intensity MDX mice								LFQ intensity WT mice					Median replicas			Stddev replicas			LC-MS annotations						Literature annotations				Significant hits				Student's T-test info
CTX_1_1	CTX_1_2	CTX_2_1	CTX_2_2	CTX_3_1	CTX_3_2	CTX_4_1	CTX_4_2	MDX_1_1	MDX_1_2	MDX_2_1	MDX_2_2	MDX_3_1	MDX_3_2	MDX_4_2	MDX_4_3	WT_2_1	WT_2_2	WT_3_1	WT_4_1	WT_4_2	CTX	MDX	WT	stddev CTX	stddev MDX	stddev WT	Peptides	Unique peptides	Sequence coverage [%]	Q-value	Score	MS/MS Count	GOBP name	GOMF name	GOCC name	KEGG name	Significant CTX_WT	Significant MDX_WT	Significant MDX_CTX	Significant	-Log p-value CTX_WT	q-value CTX_WT	Difference CTX_WT	-Log p-value MDX_WT	q-value MDX_WT	Difference MDX_WT	-Log p-value MDX_CTX	q-value MDX_CTX	Difference MDX_CTX
28.8277	28.3007	27.6767	28.1388	28.4246	28.1518	29.1504	28.9979	27.9725	27.9664	28.2974	28.1118	27.18	27.4775	28.9048	28.4293	28.121	27.4404	28.125	27.9231	NaN	28.3627	28.0421	28.022	0.498471	0.539429	0.322086	9	1	60.9	0	21.538	109	biological regulation;catabolic process;cellular catabolic process;cellular macromolecule catabolic process;cellular macromolecule metabolic process;cellular metabolic process;cellular nitrogen compound metabolic process;cellular process;establishment of localization;establishment of RNA localization;macromolecule catabolic process;macromolecule metabolic process;metabolic process;mRNA catabolic …	binding;nucleic acid binding;nucleotide binding;RNA binding	cell part;cytoplasm;intracellular organelle part;intracellular part;macromolecular complex;nuclear body;nuclear part;nuclear speck;nucleoplasm part;organelle part;ribonucleoprotein complex;spliceosomal complex	mRNA surveillance pathway;RNA transport;Spliceosome					1.13856	0.21965	0.5562	0.189068	1	0.140068	0.881535	0.185844	-0.416132
NaN	NaN	NaN	NaN	NaN	24.9808	NaN	NaN	NaN	NaN	NaN	NaN	NaN	NaN	NaN	NaN	NaN	NaN	NaN	NaN	NaN	24.9808	NaN	NaN	NaN	NaN	NaN	1	1	14	0	1.8291	5									0	1	NaN	-4.34294e-08	1	0	0	1	NaN
NaN	NaN	22.0005	NaN	NaN	NaN	NaN	NaN	NaN	NaN	NaN	NaN	NaN	NaN	NaN	NaN	NaN	NaN	NaN	NaN	NaN	22.0005	NaN	NaN	NaN	NaN	NaN	1	1	18	0	2.509	1		antigen binding;binding							0	1	NaN	-4.34294e-08	1	0	0	1	NaN
26.7402	26.4841	27.0819	26.5868	27.2916	26.8463	26.7511	26.3609	NaN	NaN	NaN	NaN	NaN	NaN	NaN	NaN	NaN	NaN	NaN	NaN	NaN	26.7457	NaN	NaN	0.306832	NaN	NaN	5	5	51.4	0	4.5712	15		antigen binding;binding	cell part;membrane;plasma membrane						0	1	NaN	-4.34294e-08	1	0	0	1	NaN
27.6063	27.0718	28.1129	28.3008	27.6216	27.9148	28.3847	27.6879	NaN	NaN	NaN	NaN	NaN	NaN	27.1676	NaN	NaN	NaN	NaN	NaN	NaN	27.8014	27.1676	NaN	0.431702	NaN	NaN	7	6	28.3	0	12.594	44		antigen binding;binding	cell part;extracellular region;integral to membrane;intrinsic to membrane;membrane;membrane part;plasma membrane						0	1	NaN	0	1	NaN	0	1	-0.670028
NaN	NaN	NaN	24.5702	25.3854	25.7802	NaN	24.8532	NaN	NaN	NaN	NaN	NaN	NaN	NaN	NaN	NaN	NaN	NaN	NaN	NaN	25.1193	NaN	NaN	0.540606	NaN	NaN	4	4	19.4	0	4.3416	15		antigen binding;binding	cell part;extracellular region;integral to membrane;intrinsic to membrane;membrane;membrane part;plasma membrane						0	1	NaN	-4.34294e-08	1	0	0	1	NaN
NaN	NaN	24.8595	23.1526	23.3424	NaN	NaN	NaN	NaN	NaN	NaN	NaN	NaN	NaN	NaN	NaN	NaN	NaN	NaN	NaN	NaN	23.3424	NaN	NaN	0.935494	NaN	NaN	2	2	7.3	0.0052832	0.43699	2		antigen binding;binding	cell part;extracellular region;integral to membrane;intrinsic to membrane;membrane;membrane part;plasma membrane						0	1	NaN	-4.34294e-08	1	0	0	1	NaN
NaN	NaN	NaN	NaN	NaN	23.6945	NaN	NaN	NaN	NaN	NaN	NaN	NaN	NaN	NaN	NaN	NaN	NaN	NaN	NaN	NaN	23.6945	NaN	NaN	NaN	NaN	NaN	1	1	19.4	0.0024111	0.55384	1		antigen binding;binding							0	1	NaN	-4.34294e-08	1	0	0	1	NaN
NaN	NaN	NaN	NaN	NaN	NaN	NaN	NaN	NaN	NaN	NaN	NaN	NaN	NaN	NaN	23.467	NaN	NaN	NaN	NaN	NaN	NaN	23.467	NaN	NaN	NaN	NaN	1	1	5.8	0.0003218	0.85852	1		antigen binding;binding							-4.34294e-08	1	0	0	1	NaN	0	1	NaN
25.8541	NaN	NaN	24.583	24.634	23.9454	24.4377	25.2797	NaN	NaN	NaN	NaN	NaN	NaN	NaN	24.459	NaN	NaN	NaN	NaN	NaN	24.6085	24.459	NaN	0.674799	NaN	NaN	6	6	3.3	0	4.472	17		adenyl nucleotide binding;adenyl ribonucleotide binding;ATP binding;binding;DNA binding;nucleic acid binding;nucleotide binding;purine nucleotide binding;purine ribonucleoside triphosphate binding;purine ribonucleotide binding;ribonucleotide binding	cell part;cytoplasmic part;Golgi apparatus;intracellular membrane-bounded organelle;intracellular organelle;intracellular part;macromolecular complex;membrane-bounded organelle;nucleus;organelle;protein complex						0	1	NaN	0	1	NaN	0	1	-0.329969
NaN	NaN	NaN	NaN	NaN	NaN	NaN	24.2999	NaN	NaN	NaN	NaN	NaN	NaN	NaN	NaN	NaN	NaN	NaN	NaN	NaN	24.2999	NaN	NaN	NaN	NaN	NaN	1	1	6.5	0.0048537	0.4468	1									0	1	NaN	-4.34294e-08	1	0	0	1	NaN
25.9781	26.0262	25.6994	25.715	25.0012	25.3865	25.3176	25.3042	25.9505	25.6631	26.1481	26.5263	26.341	26.0914	24.6935	NaN	26.9714	26.0455	NaN	NaN	NaN	25.5429	26.0914	26.5084	0.358925	0.60515	0.65471	7	7	11.5	0	6.6188	36	biological adhesion;biological regulation;cell adhesion;cell surface receptor linked signaling pathway;cellular process;cellular response to stimulus;G-protein coupled receptor protein signaling pathway;neuropeptide signaling pathway;regulation of biological process;regulation of cellular process;response to stimulus;signal transduction	binding;calcium ion binding;cation binding;G-protein coupled receptor activity;ion binding;metal ion binding;molecular transducer activity;receptor activity;signal transducer activity;signaling receptor activity;transmembrane signaling receptor activity	cell part;integral to membrane;intrinsic to membrane;membrane;membrane part;plasma membrane		+			CTX_WT	1.7424	0.0437961	-0.954875	0.573387	0.463248	-0.592141	0.757523	0.241023	0.362734
29.5786	29.5886	30.7251	30.4553	30.6873	30.5779	30.7559	30.8129	29.915	29.6837	29.3648	29.2901	29.3722	29.8496	30.5108	30.6616	28.8677	28.9071	28.3785	29.7871	29.7486	30.6326	29.7667	28.9071	0.514519	0.521191	0.611848	40	39	50.8	0	92.475	358	catabolic process;cellular catabolic process;cellular macromolecule metabolic process;cellular metabolic process;cellular nitrogen compound catabolic process;cellular nitrogen compound metabolic process;cellular process;GTP catabolic process;GTP metabolic process;heterocycle catabolic process;heterocycle metabolic process;macromolecule metabolic process;metabolic process;mRNA metabolic process;mR…	binding;catalytic activity;GTP binding;GTPase activity;guanyl nucleotide binding;guanyl ribonucleotide binding;hydrolase activity;hydrolase activity, acting on acid anhydrides;hydrolase activity, acting on acid anhydrides, in phosphorus-containing anhydrides;nucleic acid binding;nucleoside-triphosphatase activity;nucleotide binding;purine nucleotide binding;purine ribonucleoside triphosphate bind…	Cajal body;catalytic step 2 spliceosome;cell part;cytoplasm;intracellular membrane-bounded organelle;intracellular organelle;intracellular organelle part;intracellular part;macromolecular complex;membrane-bounded organelle;nuclear body;nuclear part;nuclear speck;nucleoplasm part;nucleus;organelle;organelle part;ribonucleoprotein complex;spliceosomal complex	Spliceosome	+			CTX_WT	2.68388	0.005605	1.2599	1.29072	0.119425	0.693173	1.33662	0.0728121	-0.566724
29.465	28.9232	30.0266	30.4765	30.597	30.5551	30.5104	30.1051	30.4267	30.5817	29.639	29.3314	30.3189	30.4063	31.6782	31.7045	30.1967	30.6181	30.8667	32.1513	32.3184	30.2908	30.4165	30.8667	0.604186	0.845044	0.949684	14	2	50.8	0	21.258	177	ATP biosynthetic process;ATP metabolic process;ATP synthesis coupled proton transport;biosynthetic process;cation transport;cellular biosynthetic process;cellular metabolic process;cellular nitrogen compound biosynthetic process;cellular nitrogen compound metabolic process;cellular process;energy coupled proton transport, down electrochemical gradient;establishment of localization;heterocycle bio…	active transmembrane transporter activity;ATPase activity;ATPase activity, coupled;ATPase activity, coupled to movement of substances;ATPase activity, coupled to transmembrane movement of ions;ATPase activity, coupled to transmembrane movement of substances;catalytic activity;cation transmembrane transporter activity;cation-transporting ATPase activity;hydrogen ion transmembrane transporter activ…	cell part;cytoplasmic part;intracellular organelle part;intracellular part;macromolecular complex;membrane;membrane part;mitochondrial inner membrane;mitochondrial membrane;mitochondrial membrane part;mitochondrial part;mitochondrial proton-transporting ATP synthase complex;organelle inner membrane;organelle membrane;organelle part;protein complex;proton-transporting ATP synthase complex;proton-t…		+			CTX_WT	1.67718	0.0418021	-1.14786	0.741243	0.312003	-0.719387	0.580296	0.300246	0.428477
33.2629	33.2093	32.3761	32.416	33.0534	32.8159	32.3125	32.4092	33.284	33.3523	32.4131	32.3461	33.1237	33.1577	35.0873	34.8631	32.9121	32.807	34.5442	35.8559	35.9314	32.616	33.2208	34.5442	0.401212	1.01421	1.5196	800	799	28.1	0	323.31	4076	actin cytoskeleton organization;actin filament organization;actin filament-based process;actomyosin structure organization;adult heart development;anatomical structure development;anatomical structure formation involved in morphogenesis;anatomical structure morphogenesis;anterior/posterior pattern specification;biological regulation;cardiac muscle contraction;cardiac muscle fiber development;card…	adenyl nucleotide binding;adenyl ribonucleotide binding;ATP binding;binding;calcium ion binding;catalytic activity;cation binding;enzyme regulator activity;GTPase regulator activity;guanyl-nucleotide exchange factor activity;ion binding;kinase activity;metal ion binding;nucleic acid binding;nucleoside-triphosphatase regulator activity;nucleotide binding;phosphotransferase activity, alcohol group …	cell part;chromosome;condensed chromosome;condensed nuclear chromosome;contractile fiber part;cytoplasmic part;cytoskeletal part;Golgi apparatus;intracellular membrane-bounded organelle;intracellular non-membrane-bounded organelle;intracellular organelle;intracellular organelle part;intracellular part;M band;macromolecular complex;membrane-bounded organelle;muscle myosin complex;myosin complex;my…	Dilated cardiomyopathy;Hypertrophic cardiomyopathy (HCM)	+			CTX_WT	1.94337	0.0169022	-1.67818	0.705202	0.30647	-0.956685	1.08413	0.0894553	0.721498
NaN	NaN	NaN	NaN	NaN	NaN	23.7514	24.157	NaN	NaN	NaN	NaN	NaN	NaN	NaN	24.1143	NaN	NaN	NaN	NaN	NaN	23.9542	24.1143	NaN	0.286774	NaN	NaN	3	3	4.6	0	1.2433	5		adenyl nucleotide binding;adenyl ribonucleotide binding;ATP binding;binding;catalytic activity;kinase activity;nucleotide binding;phosphotransferase activity, alcohol group as acceptor;protein kinase activity;protein serine/threonine kinase activity;protein serine/threonine/tyrosine kinase activity;protein tyrosine kinase activity;purine nucleotide binding;purine ribonucleoside triphosphate bindi…	cell part;cytoplasm;cytoskeleton;intermediate filament cytoskeleton;intracellular membrane-bounded organelle;intracellular non-membrane-bounded organelle;intracellular organelle;intracellular part;membrane-bounded organelle;non-membrane-bounded organelle;nucleus;organelle						0	1	NaN	0	1	NaN	0	1	0.16004
NaN	NaN	NaN	NaN	NaN	NaN	NaN	NaN	NaN	NaN	NaN	NaN	NaN	NaN	NaN	NaN	NaN	NaN	NaN	NaN	NaN	NaN	NaN	NaN	NaN	NaN	NaN	1	1	6.1	0.002129	0.59915	1	activation of JUN kinase activity;activation of MAPK activity;biological regulation;biosynthetic process;cellular biosynthetic process;cellular macromolecule biosynthetic process;cellular macromolecule metabolic process;cellular metabolic process;cellular nitrogen compound metabolic process;cellular process;cellular protein metabolic process;macromolecule biosynthetic process;macromolecule metabo…	binding;cyclin binding;protein binding;Tat protein binding;transcription factor binding	cell part;cytoplasm;cytoplasmic part;Golgi apparatus;intracellular membrane-bounded organelle;intracellular non-membrane-bounded organelle;intracellular organelle;intracellular organelle part;intracellular part;membrane-bounded organelle;non-membrane-bounded organelle;nuclear part;nucleolus;organelle;organelle part						-4.34294e-08	1	0	-4.34294e-08	1	0	-4.34294e-08	1	0
NaN	NaN	NaN	NaN	NaN	NaN	NaN	NaN	NaN	NaN	NaN	NaN	23.1108	NaN	NaN	NaN	NaN	NaN	NaN	NaN	NaN	NaN	23.1108	NaN	NaN	NaN	NaN	1	1	5.8	0.00094088	0.72492	1		binding;cation binding;ion binding;metal ion binding;transition metal ion binding;zinc ion binding	cell part;cytoplasmic part;endoplasmic reticulum;intracellular membrane-bounded organelle;intracellular organelle;intracellular part;membrane-bounded organelle;organelle						-4.34294e-08	1	0	0	1	NaN	0	1	NaN
26.0799	24.7116	24.6247	NaN	NaN	NaN	23.3752	23.2235	NaN	26.3009	NaN	27.0298	NaN	22.9392	26.6404	27.821	NaN	NaN	27.6313	28.4417	28.7212	24.6247	26.6404	28.4417	1.16232	1.88008	0.566084	8	8	14.9	0	4.7832	27	actin cytoskeleton organization;actin filament-based process;actomyosin structure organization;anatomical structure formation involved in morphogenesis;biological regulation;cell differentiation;cellular component assembly;cellular component assembly at cellular level;cellular component assembly involved in morphogenesis;cellular component organization;cellular component organization at cellular …		cell part;cell projection;centrosome;contractile fiber part;cytoplasmic part;cytoskeletal part;cytoskeleton;intracellular non-membrane-bounded organelle;intracellular organelle;intracellular organelle part;intracellular part;M band;membrane;microtubule organizing center;non-membrane-bounded organelle;nuclear part;nucleolus;organelle;organelle part;plasma membrane;pseudopodium;ruffle		+			CTX_WT	2.72439	0.00146	-3.86177	0.942858	0.140203	-2.11847	0.936235	0.0803881	1.74329
NaN	NaN	25.1526	25.4956	NaN	NaN	NaN	24.8469	NaN	NaN	24.8266	NaN	NaN	NaN	NaN	24.5315	NaN	NaN	NaN	NaN	NaN	25.1526	24.6791	NaN	0.324502	0.208702	NaN	7	3	18.8	0	1.5396	14	anatomical structure development;behavior;camera-type eye development;cell migration;cell motility;cell projection organization;cellular component movement;cellular component organization;cellular component organization at cellular level;cellular component organization or biogenesis;cellular component organization or biogenesis at cellular level;cellular macromolecule metabolic process;cellular m…		adherens junction;anchoring junction;cell junction;cell part;cell projection;cell-cell adherens junction;cell-cell junction;cytoplasmic part;cytoskeleton;cytosol;dendrite;filopodium;intracellular non-membrane-bounded organelle;intracellular organelle;intracellular part;lamellipodium;neuron projection;non-membrane-bounded organelle;organelle	Regulation of actin cytoskeleton					0	1	NaN	0	1	NaN	0.782944	0.195754	-0.485972
NaN	NaN	NaN	NaN	NaN	NaN	NaN	NaN	NaN	NaN	NaN	NaN	NaN	NaN	NaN	22.9243	NaN	NaN	NaN	NaN	NaN	NaN	22.9243	NaN	NaN	NaN	NaN	5	1	27.9	0.0041353	0.46562	2									-4.34294e-08	1	0	0	1	NaN	0	1	NaN
NaN	NaN	NaN	23.8992	NaN	NaN	NaN	NaN	NaN	NaN	NaN	NaN	NaN	NaN	NaN	NaN	NaN	NaN	NaN	NaN	NaN	23.8992	NaN	NaN	NaN	NaN	NaN	2	2	1.8	0.003853	0.47811	3	biological regulation;cell cycle process;cellular component organization;cellular component organization at cellular level;cellular component organization or biogenesis;cellular component organization or biogenesis at cellular level;cellular macromolecule metabolic process;cellular metabolic process;cellular nitrogen compound metabolic process;cellular process;cellular response to stimulus;cellul…	adenyl nucleotide binding;adenyl ribonucleotide binding;ATP binding;ATPase activity;ATPase activity, coupled;binding;catalytic activity;centromeric DNA binding;damaged DNA binding;dinucleotide insertion or deletion binding;dinucleotide repeat insertion binding;DNA binding;DNA insertion or deletion binding;DNA secondary structure binding;DNA-dependent ATPase activity;double-strand/single-strand DN…	cell part;chromosome;intracellular non-membrane-bounded organelle;intracellular organelle;intracellular organelle part;intracellular part;macromolecular complex;mismatch repair complex;MutSbeta complex;non-membrane-bounded organelle;nuclear chromosome;nuclear part;organelle;organelle part;protein complex	Colorectal cancer;Mismatch repair;Pathways in cancer					0	1	NaN	-4.34294e-08	1	0	0	1	NaN
NaN	NaN	NaN	NaN	NaN	NaN	NaN	23.9713	NaN	NaN	NaN	NaN	NaN	NaN	NaN	NaN	NaN	NaN	NaN	NaN	NaN	23.9713	NaN	NaN	NaN	NaN	NaN	1	1	1.9	0.0025529	0.54264	1	biosynthetic process;cellular biosynthetic process;cellular lipid metabolic process;cellular macromolecule metabolic process;cellular metabolic process;cellular process;cellular protein metabolic process;glycerolipid biosynthetic process;glycerolipid metabolic process;glycerophospholipid biosynthetic process;glycerophospholipid metabolic process;GPI anchor biosynthetic process;GPI anchor metaboli…	catalytic activity;phosphotransferase activity, for other substituted phosphate groups;transferase activity;transferase activity, transferring phosphorus-containing groups	cell part;cytoplasmic part;endoplasmic reticulum membrane;endoplasmic reticulum part;intracellular organelle part;intracellular part;membrane;membrane part;organelle membrane;organelle part	Glycosylphosphatidylinositol(GPI)-anchor biosynthesis					0	1	NaN	-4.34294e-08	1	0	0	1	NaN
23.9591	25.67	25.4928	25.911	26.5108	26.0449	25.7824	25.7902	24.8817	25.2647	NaN	25.4892	24.9077	24.7306	25.871	25.7044	NaN	25.683	NaN	NaN	NaN	25.7863	25.2647	25.683	0.745118	0.441749	NaN	9	8	12.2	0	5.5812	31	actin cytoskeleton organization;actin filament-based process;biological regulation;cellular component organization;cellular component organization at cellular level;cellular component organization or biogenesis;cellular component organization or biogenesis at cellular level;cellular process;cytoskeleton organization;organelle organization;regulation of ARF protein signal transduction;regulation o…	ARF guanyl-nucleotide exchange factor activity;binding;enzyme regulator activity;GTPase regulator activity;guanyl-nucleotide exchange factor activity;lipid binding;nucleoside-triphosphatase regulator activity;phospholipid binding;small GTPase regulator activity	cell junction;cell part;intracellular membrane-bounded organelle;intracellular non-membrane-bounded organelle;intracellular organelle;intracellular organelle part;intracellular part;membrane-bounded organelle;non-membrane-bounded organelle;nuclear part;nucleolus;nucleus;organelle;organelle part	Endocytosis					0	1	-0.0378881	0	1	-0.418851	0.586571	0.310964	-0.380963
NaN	NaN	NaN	NaN	NaN	NaN	NaN	NaN	NaN	NaN	NaN	NaN	NaN	NaN	NaN	NaN	NaN	NaN	NaN	24.7233	NaN	NaN	NaN	24.7233	NaN	NaN	NaN	1	1	0.8	0.0087656	0.3443	1	adult behavior;adult locomotory behavior;adult walking behavior;auditory receptor cell differentiation;behavior;biological regulation;body fluid secretion;cation homeostasis;cell communication;cell differentiation;cell maturation;cell volume homeostasis;cell-cell signaling;cellular cation homeostasis;cellular chemical homeostasis;cellular component assembly;cellular component organization;cellula…	binding;calcium activated cation channel activity;calcium-activated potassium channel activity;cation binding;cation channel activity;cation transmembrane transporter activity;channel activity;gated channel activity;ion binding;ion channel activity;ion gated channel activity;ion transmembrane transporter activity;large conductance calcium-activated potassium channel activity;metal ion binding;pas…	apical plasma membrane;axon part;cation channel complex;caveola;cell part;cell projection part;cytoplasmic part;endoplasmic reticulum;external side of plasma membrane;intracellular membrane-bounded organelle;intracellular organelle;intracellular part;ion channel complex;macromolecular complex;membrane;membrane part;membrane raft;membrane-bounded organelle;organelle;plasma membrane part;postsynapt…	Pancreatic secretion;Salivary secretion;Vascular smooth muscle contraction					0	1	NaN	0	1	NaN	-4.34294e-08	1	0
NaN	NaN	NaN	NaN	NaN	NaN	25.442	25.4188	NaN	NaN	NaN	NaN	NaN	NaN	25.363	NaN	NaN	NaN	NaN	NaN	NaN	25.4304	25.363	NaN	0.0163975	NaN	NaN	5	5	2.3	0	2.9241	7	biological regulation;cellular process;cellular response to stimulus;intracellular signal transduction;regulation of biological process;regulation of cellular process;response to stimulus;signal transduction;small GTPase mediated signal transduction	binding;enzyme regulator activity;GTPase regulator activity;guanyl-nucleotide exchange factor activity;lipid binding;nucleoside-triphosphatase regulator activity;phospholipid binding;Ras guanyl-nucleotide exchange factor activity;Rho guanyl-nucleotide exchange factor activity;small GTPase regulator activity							0	1	NaN	0	1	NaN	0	1	-0.0673752
23.9654	24.2422	NaN	NaN	NaN	NaN	NaN	NaN	NaN	NaN	NaN	NaN	NaN	NaN	NaN	NaN	NaN	NaN	NaN	NaN	NaN	24.1038	NaN	NaN	0.195707	NaN	NaN	5	4	23.2	0	2.2548	6	biological regulation;biosynthetic process;cell proliferation;cellular biosynthetic process;cellular component organization;cellular component organization at cellular level;cellular component organization or biogenesis;cellular component organization or biogenesis at cellular level;cellular macromolecule biosynthetic process;cellular macromolecule metabolic process;cellular metabolic process;cel…	binding;chromatin binding	cell part;chromatin remodeling complex;chromosomal part;H4/H2A histone acetyltransferase complex;histone acetyltransferase complex;histone deacetylase complex;intracellular organelle part;intracellular part;macromolecular complex;NuA4 histone acetyltransferase complex;nuclear chromosome part;nuclear part;nucleoplasm part;organelle part;protein complex;Sin3 complex;Sin3-type complex						0	1	NaN	-4.34294e-08	1	0	0	1	NaN
NaN	NaN	NaN	24.8143	NaN	NaN	NaN	NaN	NaN	NaN	NaN	NaN	NaN	NaN	NaN	NaN	NaN	NaN	NaN	NaN	NaN	24.8143	NaN	NaN	NaN	NaN	NaN	3	3	41.1	0	5.4393	6	anatomical structure formation involved in morphogenesis;biological regulation;cell projection assembly;cell projection organization;cellular component assembly;cellular component assembly at cellular level;cellular component assembly involved in morphogenesis;cellular component organization;cellular component organization at cellular level;cellular component organization or biogenesis;cellular c…		cell part;cell projection part;ciliary transition zone;cilium part;integral to membrane;intracellular organelle part;intracellular part;intrinsic to membrane;membrane part;organelle part						0	1	NaN	-4.34294e-08	1	0	0	1	NaN
NaN	NaN	23.1235	NaN	NaN	NaN	NaN	NaN	NaN	NaN	NaN	NaN	NaN	NaN	NaN	NaN	NaN	NaN	NaN	NaN	NaN	23.1235	NaN	NaN	NaN	NaN	NaN	2	2	5.4	0	1.4475	2	biological regulation;biosynthetic process;cellular biosynthetic process;cellular component organization;cellular component organization at cellular level;cellular component organization or biogenesis;cellular component organization or biogenesis at cellular level;cellular macromolecule metabolic process;cellular metabolic process;cellular nitrogen compound metabolic process;cellular process;cell…	acetyltransferase activity;catalytic activity;histone acetyltransferase activity;lysine N-acetyltransferase activity;N-acetyltransferase activity;N-acyltransferase activity;protein binding transcription factor activity;transcription coactivator activity;transcription cofactor activity;transcription factor binding transcription factor activity;transferase activity;transferase activity, transferrin…	cell part;histone acetyltransferase complex;intracellular membrane-bounded organelle;intracellular organelle;intracellular organelle part;intracellular part;macromolecular complex;membrane-bounded organelle;nuclear part;nucleoplasm part;nucleus;organelle;organelle part;protein complex;SAGA-type complex;STAGA complex	Basal transcription factors					0	1	NaN	-4.34294e-08	1	0	0	1	NaN
NaN	NaN	NaN	25.2212	25.4482	NaN	26.112	25.3812	NaN	26.2817	NaN	26.2668	NaN	NaN	NaN	NaN	27.4265	27.3462	26.1412	26.3358	27.6566	25.4147	26.2743	27.3462	0.39261	0.0105279	0.690976	13	11	7	0	10.864	28	biological adhesion;cell adhesion;cellular process		collagen;extracellular matrix part;extracellular region;extracellular region part		+			CTX_WT	2.10981	0.0140302	-1.44063	0.63864	0.385807	-0.706999	1.17135	0.0728261	0.733635
NaN	NaN	NaN	NaN	NaN	NaN	23.3101	NaN	NaN	NaN	NaN	NaN	NaN	NaN	NaN	NaN	NaN	NaN	NaN	NaN	NaN	23.3101	NaN	NaN	NaN	NaN	NaN	1	1	2.4	0	2.3275	1	biological regulation;cellular process;cellular response to stimulus;establishment of localization;establishment of localization in cell;establishment of protein localization;intracellular protein transport;intracellular transport;protein transport;regulation of biological process;regulation of biosynthetic process;regulation of cellular biosynthetic process;regulation of cellular macromolecule b…	enzyme regulator activity;GTPase regulator activity;nucleoside-triphosphatase regulator activity;small GTPase regulator activity	cell part;cytoplasm;intracellular part;membrane						0	1	NaN	-4.34294e-08	1	0	0	1	NaN
NaN	NaN	NaN	NaN	NaN	NaN	NaN	NaN	NaN	NaN	NaN	NaN	NaN	NaN	NaN	NaN	23.6577	NaN	NaN	NaN	NaN	NaN	NaN	23.6577	NaN	NaN	NaN	3	3	38.8	0	1.759	7									0	1	NaN	0	1	NaN	-4.34294e-08	1	0
28.4022	28.0878	28.986	29.043	29.1311	29.1682	29.6639	29.6335	28.3864	28.3258	28.5004	27.5938	28.3353	28.4211	29.0576	28.9919	26.6089	28.5104	26.9631	NaN	NaN	29.0871	28.4038	26.9631	0.544778	0.452302	1.01117	32	31	22.5	0	64.214	199	anatomical structure development;anatomical structure formation involved in morphogenesis;biological regulation;brain development;cell proliferation;cellular process;cellular response to stimulus;developmental process;multicellular organismal development;multicellular organismal process;neural precursor cell proliferation;neural tube closure;neuroblast proliferation;organ development;positive reg…	molecular transducer activity;receptor activity;semaphorin receptor activity;signal transducer activity;signaling receptor activity;transmembrane signaling receptor activity	cell part;integral to membrane;integral to plasma membrane;intracellular;intrinsic to membrane;intrinsic to plasma membrane;membrane part;plasma membrane part	Axon guidance	+			CTX_WT	2.24665	0.00906236	1.65367	1.5359	0.0507946	1.09073	1.38557	0.0686841	-0.562936
26.8227	27.4359	26.7155	26.9824	26.8618	26.8516	27.4205	27.4688	27.0769	26.8473	26.3017	25.9189	26.7727	26.7915	28.0825	28.1134	NaN	26.9533	NaN	28.7046	28.6022	26.9221	26.8194	28.6022	0.316507	0.77377	0.982906	10	8	34	0	61.897	72	cell cycle phase;cell cycle process;cell division;cellular component organization;cellular component organization at cellular level;cellular component organization or biogenesis;cellular component organization or biogenesis at cellular level;cellular process;mitosis;nuclear division;organelle fission;organelle organization		cell part;cytoplasm;cytoskeletal part;cytoskeleton;intracellular non-membrane-bounded organelle;intracellular organelle;intracellular organelle part;intracellular part;macromolecular complex;microtubule;microtubule cytoskeleton;non-membrane-bounded organelle;organelle;organelle part;protein complex		+			CTX_WT	1.66706	0.0477264	-1.01677	1.09317	0.126236	-1.09858	0.104577	0.905913	-0.081805
28.1034	27.3498	27.3806	27.3867	27.9693	28.0904	27.703	27.5866	27.1865	27.0272	26.9276	27.6657	27.8714	27.9452	28.1525	27.4692	27.2697	27.2498	26.6923	26.6139	27.456	27.6448	27.5675	27.2498	0.321434	0.45233	0.377817	4	4	19.5	0	4.6307	53	cellular component biogenesis;cellular component biogenesis at cellular level;cellular component organization or biogenesis;cellular component organization or biogenesis at cellular level;cellular macromolecule metabolic process;cellular metabolic process;cellular nitrogen compound metabolic process;cellular process;macromolecule metabolic process;macromolecule modification;metabolic process;ncRN…	binding;catalytic activity;intramolecular transferase activity;isomerase activity;nucleic acid binding;pseudouridine synthase activity;RNA binding;snoRNA binding	box H/ACA RNP complex;box H/ACA snoRNP complex;Cajal body;cell part;dense fibrillar component;intracellular organelle part;intracellular part;macromolecular complex;nuclear body;nuclear part;nucleolar part;nucleoplasm part;organelle part;ribonucleoprotein complex;small nucleolar ribonucleoprotein complex	Ribosome biogenesis in eukaryotes	+			CTX_WT	2.12872	0.0433345	0.639883	1.11261	0.213447	0.47432	0.384137	0.560392	-0.165563
26.567	26.5849	26.9849	26.7282	27.2697	26.874	27.5345	27.1359	27.448	27.0677	27.266	26.5722	27.3994	27.4858	29.1526	28.7469	27.4763	27.219	29.0535	30.977	30.7808	26.9294	27.4237	29.0535	0.340977	0.865142	1.76953	18	17	30.3	0	18.288	112	acylglycerol metabolic process;adiponectin-mediated signaling pathway;biological regulation;biosynthetic process;catabolic process;cell surface receptor linked signaling pathway;cellular catabolic process;cellular lipid metabolic process;cellular metabolic process;cellular process;cellular response to chemical stimulus;cellular response to cytokine stimulus;cellular response to organic substance;…	adenyl nucleotide binding;adenyl ribonucleotide binding;ATP binding;binding;catalytic activity;fatty acid ligase activity;ligase activity;ligase activity, forming carbon-sulfur bonds;long-chain fatty acid-CoA ligase activity;nucleotide binding;purine nucleotide binding;purine ribonucleoside triphosphate binding;purine ribonucleotide binding;ribonucleotide binding	cell part;cytoplasmic part;endoplasmic reticulum;endoplasmic reticulum membrane;endoplasmic reticulum part;integral to membrane;intracellular membrane-bounded organelle;intracellular organelle;intracellular organelle part;intracellular part;intrinsic to membrane;membrane;membrane part;membrane-bounded organelle;microbody;microbody membrane;microbody part;mitochondrial membrane;mitochondrial outer…	Adipocytokine signaling pathway;Fatty acid metabolism;Peroxisome;PPAR signaling pathway	+			CTX_WT	2.23556	0.00718182	-2.14143	1.16027	0.0917548	-1.45898	1.24549	0.0709123	0.682452
NaN	NaN	NaN	NaN	NaN	23.3358	NaN	NaN	NaN	NaN	NaN	NaN	NaN	NaN	NaN	NaN	NaN	NaN	NaN	NaN	NaN	23.3358	NaN	NaN	NaN	NaN	NaN	1	1	5.7	0	1.9152	1			cell part;cytoplasm;cytoplasmic part;Golgi apparatus;intracellular membrane-bounded organelle;intracellular non-membrane-bounded organelle;intracellular organelle;intracellular organelle part;intracellular part;membrane-bounded organelle;non-membrane-bounded organelle;nuclear part;nucleolus;organelle;organelle part						0	1	NaN	-4.34294e-08	1	0	0	1	NaN
NaN	NaN	NaN	NaN	NaN	NaN	NaN	NaN	NaN	NaN	NaN	22.663	NaN	NaN	NaN	NaN	NaN	NaN	NaN	NaN	NaN	NaN	22.663	NaN	NaN	NaN	NaN	1	1	2.8	0.0014006	0.69971	2	anatomical structure development;anatomical structure formation involved in morphogenesis;anatomical structure morphogenesis;angiogenesis;artery development;biological regulation;blood vessel development;blood vessel remodeling;BMP signaling pathway;cell activation;cell differentiation;cell migration;cell motility;cell surface receptor linked signaling pathway;cellular component assembly;cellular…	adenyl nucleotide binding;adenyl ribonucleotide binding;ATP binding;binding;catalytic activity;cation binding;ion binding;kinase activity;metal ion binding;molecular transducer activity;nucleotide binding;phosphotransferase activity, alcohol group as acceptor;protein kinase activity;protein serine/threonine kinase activity;purine nucleotide binding;purine ribonucleoside triphosphate binding;purin…	cell body;cell part;cell projection;cell surface;dendrite;integral to membrane;integral to plasma membrane;intrinsic to membrane;intrinsic to plasma membrane;membrane part;neuron projection;neuronal cell body;plasma membrane part						-4.34294e-08	1	0	0	0.887195	NaN	0	0.80986	NaN
26.4441	26.1444	27.2938	26.3354	27.2166	26.8689	28.0288	27.8181	NaN	NaN	NaN	NaN	NaN	NaN	26.7701	26.4691	NaN	NaN	NaN	NaN	NaN	27.0428	26.6196	NaN	0.692604	0.212867	NaN	12	12	34.8	0	25.157	50	activation of caspase activity;anatomical structure development;anatomical structure formation involved in morphogenesis;angiogenesis;biological regulation;cell differentiation;cellular component assembly;cellular component organization;cellular component organization or biogenesis;cellular developmental process;cellular process;cellular response to abiotic stimulus;cellular response to external …	catalytic activity;cysteine-type endopeptidase activity;cysteine-type endopeptidase activity involved in apoptotic process;cysteine-type peptidase activity;endopeptidase activity;hydrolase activity;peptidase activity;peptidase activity, acting on L-amino acid peptides	CD95 death-inducing signaling complex;cell body;cell part;cell projection;centrosome;cytoplasmic part;cytoskeletal part;cytosol;death-inducing signaling complex;intracellular membrane-bounded organelle;intracellular non-membrane-bounded organelle;intracellular organelle;intracellular organelle part;intracellular part;macromolecular complex;membrane part;membrane raft;membrane-bounded organelle;mi…	Alzheimer's disease;Apoptosis;Chagas disease (American trypanosomiasis);Huntington's disease;ko05152;NOD-like receptor signaling pathway;p53 signaling pathway;Pathways in cancer;RIG-I-like receptor signaling pathway;Toll-like receptor signaling pathway;Toxoplasmosis;Viral myocarditis					0	1	NaN	0	1	NaN	0.336172	0.497026	-0.399149
27.6805	28.2154	29.2822	29.1749	29.2329	29.179	29.4081	28.9919	29.0955	29.2055	28.8226	28.6063	29.5986	29.5462	29.8055	29.5439	29.9828	29.9566	30.2044	29.7389	29.2753	29.1769	29.3747	29.9566	0.613252	0.41761	0.351978	30	27	40.7	0	44.447	230	10-formyltetrahydrofolate catabolic process;10-formyltetrahydrofolate metabolic process;aromatic compound catabolic process;biosynthetic process;catabolic process;cellular aromatic compound metabolic process;cellular catabolic process;cellular metabolic process;cellular nitrogen compound catabolic process;cellular nitrogen compound metabolic process;cellular process;coenzyme catabolic process;coe…	catalytic activity;formyltetrahydrofolate dehydrogenase activity;hydroxymethyl-, formyl- and related transferase activity;methyltransferase activity;oxidoreductase activity;oxidoreductase activity, acting on the aldehyde or oxo group of donors;oxidoreductase activity, acting on the aldehyde or oxo group of donors, NAD or NADP as acceptor;oxidoreductase activity, acting on the CH-NH group of donor…	cell part;cytoplasmic part;intracellular membrane-bounded organelle;intracellular organelle;intracellular part;membrane-bounded organelle;mitochondrion;organelle	One carbon pool by folate	+			CTX_WT	1.97905	0.0298442	-0.935976	1.49793	0.107573	-0.553585	0.777347	0.228912	0.38239
28.2812	28.1905	28.6023	28.1404	28.322	28.6501	28.5941	28.787	28.6202	28.5872	28.3512	28.2943	28.2495	28.0346	29.4902	27.8202	27.6953	27.8171	27.7169	27.3939	28.2019	28.458	28.3227	27.7169	0.240682	0.502907	0.290882	17	1	41.7	0	22.848	119	anatomical structure development;astrocyte differentiation;biological regulation;biosynthetic process;cell differentiation;cell differentiation in hindbrain;cellular biosynthetic process;cellular developmental process;cellular macromolecule biosynthetic process;cellular macromolecule metabolic process;cellular metabolic process;cellular nitrogen compound metabolic process;cellular process;central…	binding;DNA binding;nucleic acid binding;nucleic acid binding transcription factor activity;sequence-specific DNA binding transcription factor activity	cell part;intracellular membrane-bounded organelle;intracellular organelle;intracellular part;membrane-bounded organelle;nucleus;organelle		+			CTX_WT	3.11116	0.0115943	0.680892	1.65987	0.0677388	0.665892	0.0266788	1	-0.0150001
NaN	NaN	NaN	NaN	NaN	NaN	NaN	NaN	NaN	NaN	NaN	NaN	NaN	24.9901	NaN	NaN	NaN	NaN	NaN	NaN	NaN	NaN	24.9901	NaN	NaN	NaN	NaN	2	2	10.8	0	1.8045	6	establishment of localization;hydrogen transport;molecular hydrogen transport;transport	binding;catalytic activity;cation binding;hydroxyacid-oxoacid transhydrogenase activity;ion binding;metal ion binding;oxidoreductase activity;oxidoreductase activity, acting on CH-OH group of donors	cell part;cytoplasmic part;intracellular membrane-bounded organelle;intracellular organelle;intracellular part;membrane-bounded organelle;mitochondrion;organelle						-4.34294e-08	1	0	0	1	NaN	0	1	NaN
NaN	NaN	NaN	23.7815	24.975	24.939	NaN	NaN	NaN	NaN	NaN	NaN	NaN	NaN	NaN	NaN	NaN	NaN	NaN	NaN	NaN	24.939	NaN	NaN	0.678952	NaN	NaN	1	1	6	0.0028409	0.5275	5	apoptosis;biological regulation;cell death;cellular process;cellular response to stimulus;death;I-kappaB kinase/NF-kappaB cascade;intracellular protein kinase cascade;intracellular signal transduction;negative regulation of apoptosis;negative regulation of biological process;negative regulation of cell death;negative regulation of cellular process;negative regulation of programmed cell death;posi…		cell part;cytoplasm;intracellular part						0	1	NaN	-4.34294e-08	1	0	0	1	NaN
NaN	23.4767	NaN	NaN	NaN	NaN	NaN	NaN	NaN	NaN	NaN	NaN	NaN	NaN	NaN	NaN	NaN	NaN	NaN	NaN	NaN	23.4767	NaN	NaN	NaN	NaN	NaN	1	1	3.9	0	2.2495	1									0	1	NaN	-4.34294e-08	1	0	0	1	NaN
NaN	23.7876	NaN	NaN	NaN	NaN	NaN	NaN	NaN	NaN	NaN	NaN	NaN	NaN	NaN	NaN	NaN	NaN	NaN	NaN	NaN	23.7876	NaN	NaN	NaN	NaN	NaN	9	1	70.1	0	1.3137	1									0	1	NaN	-4.34294e-08	1	0	0	1	NaN
NaN	NaN	NaN	NaN	NaN	NaN	NaN	NaN	NaN	NaN	NaN	NaN	NaN	24.1193	NaN	NaN	NaN	NaN	NaN	NaN	NaN	NaN	24.1193	NaN	NaN	NaN	NaN	2	2	7.6	0.00064051	0.83198	3									-4.34294e-08	1	0	0	1	NaN	0	1	NaN
NaN	NaN	NaN	NaN	NaN	NaN	NaN	NaN	NaN	NaN	NaN	NaN	NaN	NaN	NaN	NaN	NaN	NaN	NaN	NaN	29.3879	NaN	NaN	29.3879	NaN	NaN	NaN	1	1	2	0.0091612	0.32642	7	apoptosis;biological regulation;cell cycle process;cell death;cell proliferation;cellular component assembly;cellular component organization;cellular component organization or biogenesis;cellular process;cellular response to chemical stimulus;cellular response to hypoxia;cellular response to oxygen levels;cellular response to stimulus;cellular response to stress;death;DNA damage response, signal …	binding;cation binding;ion binding;metal ion binding;transition metal ion binding;zinc ion binding	cell part;intracellular membrane-bounded organelle;intracellular organelle;intracellular part;membrane-bounded organelle;nucleus;organelle	p53 signaling pathway					0	1	NaN	0	1	NaN	-4.34294e-08	1	0
NaN	NaN	NaN	NaN	NaN	NaN	NaN	NaN	NaN	NaN	NaN	NaN	NaN	NaN	25.2501	25.4772	NaN	NaN	NaN	NaN	NaN	NaN	25.3636	NaN	NaN	0.160584	NaN	3	3	8.6	0.00016407	0.9515	5									-4.34294e-08	1	0	0	1	NaN	0	1	NaN
28.6017	28.1902	NaN	NaN	27.1317	26.8148	NaN	NaN	27.0115	27.9006	29.4342	28.5181	27.2686	27.4008	28.1978	NaN	26.8851	NaN	NaN	NaN	NaN	27.661	27.9006	26.8851	0.848327	0.840158	NaN	5	5	24.2	0	1.3234	47	biological regulation;cellular component organization;cellular component organization at cellular level;cellular component organization or biogenesis;cellular component organization or biogenesis at cellular level;cellular process;chromatin modification;chromatin organization;chromosome organization;organelle organization;positive regulation of biological process;positive regulation of biosynthet…	binding;chromatin binding;chromatin DNA binding;DNA binding;nucleic acid binding;nucleosomal DNA binding;nucleosome binding;structure-specific DNA binding	cell part;chromatin;chromosomal part;cytoplasm;intracellular membrane-bounded organelle;intracellular organelle;intracellular organelle part;intracellular part;membrane-bounded organelle;nucleus;organelle;organelle part						0	1	0.799556	0	1	1.07658	0.212758	0.674283	0.277027
NaN	NaN	NaN	NaN	26.3029	NaN	NaN	NaN	NaN	NaN	NaN	NaN	NaN	NaN	NaN	NaN	NaN	NaN	NaN	NaN	27.2657	26.3029	NaN	27.2657	NaN	NaN	NaN	5	5	1.5	0	1.2217	9	anatomical structure development;cardiac cell development;cardiac muscle cell development;cell development;cellular developmental process;cellular process;chordate embryonic development;developmental process;embryo development;embryo development ending in birth or egg hatching;in utero embryonic development;muscle cell development;respiratory system development;system development	adenyl nucleotide binding;adenyl ribonucleotide binding;ATP binding;binding;catalytic activity;kinase activity;nucleotide binding;phosphotransferase activity, alcohol group as acceptor;protein kinase activity;protein serine/threonine kinase activity;purine nucleotide binding;purine ribonucleoside triphosphate binding;purine ribonucleotide binding;ribonucleotide binding;transferase activity;transf…	cell part;intracellular membrane-bounded organelle;intracellular organelle;intracellular part;membrane-bounded organelle;nucleus;organelle						0	1	-0.96277	0	1	NaN	0	1	NaN
NaN	NaN	NaN	NaN	NaN	NaN	NaN	NaN	NaN	NaN	NaN	23.2932	NaN	NaN	NaN	NaN	NaN	NaN	NaN	NaN	NaN	NaN	23.2932	NaN	NaN	NaN	NaN	1	1	7.1	0	1.6491	2	adult heart development;anatomical structure development;apoptosis;biological regulation;biosynthetic process;cell cycle process;cell death;cellular biosynthetic process;cellular macromolecule biosynthetic process;cellular macromolecule metabolic process;cellular metabolic process;cellular nitrogen compound metabolic process;cellular process;death;developmental process;G1/S transition of mitotic …	ATPase activity;ATPase activity, coupled;binding;catalytic activity;cation binding;DNA-dependent ATPase activity;hydrolase activity;hydrolase activity, acting on acid anhydrides;hydrolase activity, acting on acid anhydrides, in phosphorus-containing anhydrides;ion binding;kinase activity;metal ion binding;nucleoside-triphosphatase activity;phosphotransferase activity, alcohol group as acceptor;pr…	cell part;cytoplasm;holo TFIIH complex;intracellular organelle part;intracellular part;macromolecular complex;nuclear part;nucleoplasm part;organelle part;protein complex;transcription factor complex	Basal transcription factors;Nucleotide excision repair					-4.34294e-08	1	0	0	1	NaN	0	1	NaN
NaN	NaN	NaN	25.1137	24.8307	NaN	NaN	NaN	NaN	NaN	NaN	NaN	NaN	NaN	NaN	NaN	NaN	NaN	NaN	NaN	NaN	24.9722	NaN	NaN	0.200147	NaN	NaN	1	1	7.8	0.00016906	1.1395	3									0	1	NaN	-4.34294e-08	1	0	0	1	NaN
NaN	NaN	NaN	NaN	NaN	NaN	NaN	NaN	NaN	NaN	NaN	NaN	NaN	NaN	NaN	NaN	NaN	NaN	NaN	NaN	NaN	NaN	NaN	NaN	NaN	NaN	NaN	2	1	54.5	0.00016255	0.91352	1									-4.34294e-08	1	0	-4.34294e-08	1	0	-4.34294e-08	1	0
NaN	26.3473	26.7371	27.6211	27.1692	26.8237	27.0002	27.3935	27.2668	27.1472	25.1658	25.7714	27.1557	27.041	26.0348	26.405	NaN	25.3386	25.6225	NaN	26.1119	27.0002	26.723	25.6225	0.427077	0.780646	0.39118	15	15	21	0	11.468	64	biological regulation;calcium ion homeostasis;catabolic process;cation homeostasis;cellular calcium ion homeostasis;cellular catabolic process;cellular cation homeostasis;cellular chemical homeostasis;cellular divalent inorganic cation homeostasis;cellular homeostasis;cellular ion homeostasis;cellular macromolecule catabolic process;cellular macromolecule metabolic process;cellular metabolic proc…		cell part;Cul5-RING ubiquitin ligase complex;cullin-RING ubiquitin ligase complex;cytoplasm;intracellular membrane-bounded organelle;intracellular organelle;intracellular part;macromolecular complex;membrane;membrane-bounded organelle;nucleus;organelle;plasma membrane;protein complex;ubiquitin ligase complex	Ubiquitin mediated proteolysis	+			CTX_WT	2.74395	0.00473919	1.32218	0.890854	0.220054	0.807463	0.837365	0.174897	-0.514714
25.5817	NaN	26.1609	25.0393	NaN	NaN	26.004	25.6443	NaN	NaN	NaN	NaN	NaN	NaN	NaN	25.8731	NaN	NaN	NaN	NaN	NaN	25.6443	25.8731	NaN	0.435152	NaN	NaN	3	3	8.9	0	5.3369	17	biological regulation;biosynthetic process;cellular biosynthetic process;cellular macromolecule biosynthetic process;cellular macromolecule metabolic process;cellular metabolic process;cellular nitrogen compound metabolic process;cellular process;cellular response to stimulus;cellular response to stress;macromolecule biosynthetic process;macromolecule metabolic process;metabolic process;nitrogen …	binding;catalytic activity;DNA binding;histone methyltransferase activity;histone methyltransferase activity (H3-K4 specific);histone-lysine N-methyltransferase activity;lysine N-methyltransferase activity;methyltransferase activity;N-methyltransferase activity;nucleic acid binding;protein methyltransferase activity;protein-lysine N-methyltransferase activity;regulatory region DNA binding;regulat…	cell part;chromatin remodeling complex;histone methyltransferase complex;intracellular organelle part;intracellular part;macromolecular complex;methyltransferase complex;MLL1 complex;nuclear part;nucleoplasm part;organelle part;protein complex;Set1C/COMPASS complex						0	1	NaN	0	1	NaN	0	1	0.187051
NaN	NaN	NaN	NaN	NaN	NaN	NaN	NaN	NaN	NaN	NaN	NaN	NaN	NaN	NaN	NaN	NaN	NaN	NaN	NaN	25.1857	NaN	NaN	25.1857	NaN	NaN	NaN	2	2	4.5	0.0013966	0.68978	2	axon ensheathment;biological regulation;biosynthetic process;cell differentiation;cellular biosynthetic process;cellular developmental process;cellular macromolecule biosynthetic process;cellular macromolecule metabolic process;cellular metabolic process;cellular nitrogen compound metabolic process;cellular process;developmental process;endochondral ossification;ensheathment of neurons;glial cell…	binding;protein binding;transcription factor binding	cell part;intracellular membrane-bounded organelle;intracellular organelle;intracellular part;membrane-bounded organelle;nucleus;organelle						0	1	NaN	0	1	NaN	-4.34294e-08	1	0
NaN	24.8967	NaN	25.7502	25.2931	25.2968	25.2881	25.7358	NaN	NaN	25.246	NaN	NaN	25.4887	25.6756	26.6342	NaN	NaN	NaN	NaN	NaN	25.295	25.5821	NaN	0.322484	0.608066	NaN	6	6	23.7	0	6.7254	17	acyl-CoA biosynthetic process;acyl-CoA metabolic process;amine metabolic process;aromatic amino acid family metabolic process;biosynthetic process;carboxylic acid metabolic process;cellular amine metabolic process;cellular amino acid metabolic process;cellular aromatic compound metabolic process;cellular biogenic amine metabolic process;cellular biosynthetic process;cellular ketone metabolic proc…	acyl-CoA dehydrogenase activity;binding;carboxylic acid binding;catalytic activity;coenzyme binding;cofactor binding;fatty acid binding;fatty-acyl-CoA binding;flavin adenine dinucleotide binding;glutaryl-CoA dehydrogenase activity;lipid binding;monocarboxylic acid binding;oxidoreductase activity;oxidoreductase activity, acting on the CH-CH group of donors	cell part;cytoplasmic part;intracellular organelle lumen;intracellular organelle part;intracellular part;membrane;membrane-enclosed lumen;mitochondrial inner membrane;mitochondrial matrix;mitochondrial membrane;mitochondrial part;organelle inner membrane;organelle lumen;organelle membrane;organelle part	Benzoate degradation;Fatty acid metabolism;Lysine degradation;Tryptophan metabolism					0	1	NaN	0	1	NaN	0.650615	0.277748	0.384329
24.9884	NaN	NaN	NaN	NaN	NaN	NaN	NaN	NaN	NaN	NaN	NaN	NaN	NaN	NaN	NaN	NaN	NaN	NaN	NaN	NaN	24.9884	NaN	NaN	NaN	NaN	NaN	6	6	2.4	0	4.5656	6	biological regulation;biosynthetic process;cell growth;cellular biosynthetic process;cellular component organization;cellular component organization at cellular level;cellular component organization or biogenesis;cellular component organization or biogenesis at cellular level;cellular macromolecule biosynthetic process;cellular macromolecule metabolic process;cellular metabolic process;cellular n…	binding;catalytic activity;cation binding;histone methyltransferase activity;histone-lysine N-methyltransferase activity;ion binding;lysine N-methyltransferase activity;metal ion binding;methyltransferase activity;N-methyltransferase activity;protein methyltransferase activity;protein-lysine N-methyltransferase activity;S-adenosylmethionine-dependent methyltransferase activity;transferase activit…	cell part;intracellular membrane-bounded organelle;intracellular organelle;intracellular part;membrane-bounded organelle;nucleus;organelle						0	1	NaN	-4.34294e-08	1	0	0	1	NaN
30.8383	31.0077	31.3239	31.2086	31.2106	31.285	31.2017	31.4192	31.3946	31.5147	31.0042	31.0652	31.2602	31.2853	31.8915	31.776	31.5577	31.5186	31.8634	32.0582	32.1546	31.2096	31.34	31.8634	0.18411	0.315681	0.287082	114	7	43.1	0	152.68	908		endopeptidase inhibitor activity;endopeptidase regulator activity;enzyme inhibitor activity;enzyme regulator activity;peptidase inhibitor activity;peptidase regulator activity;serine-type endopeptidase inhibitor activity	cell part;extracellular matrix;extracellular region part;extracellular space;membrane;plasma membrane;sarcolemma		+			CTX_WT	3.37686	0.010361	-0.643657	1.51251	0.145135	-0.431566	0.91025	0.295421	0.212091
27.3411	26.8486	27.4627	29.1743	28.5026	28.1666	NaN	NaN	NaN	27.2404	NaN	NaN	NaN	NaN	NaN	NaN	NaN	NaN	NaN	NaN	NaN	27.8147	27.2404	NaN	0.856207	NaN	NaN	8	8	13.2	0	8.09	31	cell differentiation;cellular developmental process;cellular process;developmental process;gamete generation;male gamete generation;microtubule severing;microtubule-based process;multicellular organismal development;multicellular organismal process;multicellular organismal reproductive process;reproductive process;spermatogenesis	adenyl nucleotide binding;adenyl ribonucleotide binding;ATP binding;ATPase activity;ATPase activity, coupled;binding;catalytic activity;hydrolase activity;hydrolase activity, acting on acid anhydrides;hydrolase activity, acting on acid anhydrides, in phosphorus-containing anhydrides;microtubule-severing ATPase activity;nucleoside-triphosphatase activity;nucleotide binding;purine nucleotide bindin…	cell part;cytoplasm;cytoplasmic part;cytoskeletal part;intracellular membrane-bounded organelle;intracellular organelle;intracellular organelle part;intracellular part;macromolecular complex;membrane-bounded organelle;microtubule;mitochondrion;organelle;organelle part;protein complex	Ribosome biogenesis in eukaryotes					0	1	NaN	0	1	NaN	0	1	-0.675558
NaN	NaN	NaN	NaN	NaN	NaN	25.8284	25.2824	NaN	NaN	NaN	NaN	NaN	NaN	NaN	NaN	NaN	NaN	NaN	NaN	NaN	25.5554	NaN	NaN	0.386031	NaN	NaN	4	4	10.4	0.00016892	1.1354	3	biological regulation;biosynthetic process;cellular biosynthetic process;cellular macromolecule biosynthetic process;cellular macromolecule metabolic process;cellular metabolic process;cellular nitrogen compound metabolic process;cellular process;cellular response to stimulus;cellular response to stress;DNA metabolic process;DNA recombination;DNA repair;double-strand break repair;macromolecule bi…	adenyl nucleotide binding;adenyl ribonucleotide binding;ATP binding;binding;nucleotide binding;purine nucleotide binding;purine ribonucleoside triphosphate binding;purine ribonucleotide binding;ribonucleotide binding	cell part;chromatin remodeling complex;chromosomal part;cytoplasm;DNA helicase complex;Ino80 complex;intracellular organelle part;intracellular part;macromolecular complex;nuclear chromosome part;nuclear part;organelle part;protein complex						0	1	NaN	-4.34294e-08	1	0	0	1	NaN
NaN	NaN	NaN	NaN	NaN	NaN	NaN	NaN	NaN	NaN	NaN	NaN	NaN	NaN	NaN	NaN	NaN	23.6009	NaN	NaN	NaN	NaN	NaN	23.6009	NaN	NaN	NaN	2	2	3.2	0	1.7237	16	biological regulation;cellular process;cellular response to stimulus;positive regulation of catalytic activity;positive regulation of GTPase activity;positive regulation of hydrolase activity;positive regulation of molecular function;regulation of biological process;regulation of catabolic process;regulation of catalytic activity;regulation of cellular catabolic process;regulation of cellular met…	binding;enzyme activator activity;enzyme regulator activity;GTPase activator activity;GTPase regulator activity;lipid binding;nucleoside-triphosphatase regulator activity;phospholipid binding	cell part;intracellular						0	1	NaN	0	1	NaN	-4.34294e-08	1	0
25.9021	25.3998	NaN	NaN	NaN	NaN	NaN	NaN	NaN	NaN	NaN	NaN	NaN	NaN	NaN	NaN	NaN	NaN	NaN	NaN	NaN	25.651	NaN	NaN	0.355193	NaN	NaN	5	5	2.9	0	2.6875	9	biological regulation;biosynthetic process;cellular biosynthetic process;cellular component organization;cellular component organization at cellular level;cellular component organization or biogenesis;cellular component organization or biogenesis at cellular level;cellular macromolecule biosynthetic process;cellular macromolecule metabolic process;cellular metabolic process;cellular nitrogen comp…	binding;catalytic activity;cation binding;dioxygenase activity;ion binding;metal ion binding;oxidoreductase activity;oxidoreductase activity, acting on single donors with incorporation of molecular oxygen;oxidoreductase activity, acting on single donors with incorporation of molecular oxygen, incorporation of two atoms of oxygen	cell part;intracellular membrane-bounded organelle;intracellular organelle;intracellular part;membrane-bounded organelle;nucleus;organelle						0	1	NaN	-4.34294e-08	1	0	0	1	NaN
NaN	NaN	28.2384	27.2009	27.7397	27.8372	29.4018	28.8396	26.2552	27.5775	26.1763	NaN	NaN	NaN	28.089	28.0701	27.1448	NaN	25.696	NaN	26.4151	28.0378	27.5775	26.4151	0.799515	0.951947	0.724406	10	3	9.8	0	2.6123	38	biological regulation;catabolic process;cellular catabolic process;cellular chemical homeostasis;cellular homeostasis;cellular ion homeostasis;cellular macromolecule catabolic process;cellular macromolecule metabolic process;cellular metabolic process;cellular process;cellular protein metabolic process;chemical homeostasis;homeostatic process;ion homeostasis;macromolecule catabolic process;macrom…	acid-amino acid ligase activity;catalytic activity;channel inhibitor activity;channel regulator activity;ion channel inhibitor activity;ligase activity;ligase activity, forming carbon-nitrogen bonds;small conjugating protein ligase activity;sodium channel inhibitor activity;sodium channel regulator activity;ubiquitin-protein ligase activity	cell part;cytoplasm;intracellular membrane-bounded organelle;intracellular organelle;intracellular part;membrane-bounded organelle;nucleus;organelle	Aldosterone-regulated sodium reabsorption;Endocytosis;Ubiquitin mediated proteolysis	+			CTX_WT	1.85343	0.019157	1.79096	0.59687	0.405235	0.814973	1.01266	0.0851571	-0.975992
27.7796	26.6513	28.3932	28.9681	29.1672	28.7914	29.3386	29.6586	27.6765	28.0645	26.4342	26.4388	27.7555	27.8965	28.3691	28.8148	NaN	NaN	NaN	26.3905	26.5546	28.8797	27.826	26.4725	0.976361	0.849866	0.116015	32	1	35.1	0	58.326	177	biological regulation;catabolic process;cellular catabolic process;cellular macromolecule catabolic process;cellular macromolecule metabolic process;cellular metabolic process;cellular nitrogen compound metabolic process;cellular process;cellular protein metabolic process;cellular response to stimulus;cellular response to stress;DNA metabolic process;DNA repair;macromolecule catabolic process;mac…	catalytic activity;cysteine-type endopeptidase activity;cysteine-type peptidase activity;endopeptidase activity;hydrolase activity;hydrolase activity, acting on ester bonds;peptidase activity;peptidase activity, acting on L-amino acid peptides;small conjugating protein-specific protease activity;thiolester hydrolase activity;ubiquitin thiolesterase activity;ubiquitin-specific protease activity	cell part;cytoplasm;cytoplasmic part;cytosol;intracellular membrane-bounded organelle;intracellular organelle;intracellular part;membrane-bounded organelle;nucleus;organelle		+			CTX_WT	1.72431	0.0221975	2.12097	1.04086	0.136267	1.20872	1.17989	0.0640073	-0.912247
25.743	25.301	25.4423	25.1796	24.9194	25.0294	NaN	NaN	NaN	NaN	NaN	NaN	NaN	NaN	NaN	NaN	NaN	NaN	NaN	NaN	NaN	25.2403	NaN	NaN	0.29779	NaN	NaN	28	5	68.8	0	4.7842	14	cellular component assembly;cellular component assembly at cellular level;cellular component organization;cellular component organization at cellular level;cellular component organization or biogenesis;cellular component organization or biogenesis at cellular level;cellular macromolecular complex assembly;cellular macromolecular complex subunit organization;cellular process;cellular protein compl…	binding;catalytic activity;GTP binding;GTPase activity;guanyl nucleotide binding;guanyl ribonucleotide binding;hydrolase activity;hydrolase activity, acting on acid anhydrides;hydrolase activity, acting on acid anhydrides, in phosphorus-containing anhydrides;nucleoside-triphosphatase activity;nucleotide binding;purine nucleotide binding;purine ribonucleoside triphosphate binding;purine ribonucleo…	cell part;cytoplasm;cytoskeletal part;intracellular organelle part;intracellular part;macromolecular complex;microtubule;organelle part;protein complex	Gap junction;Pathogenic Escherichia coli infection;Phagosome					0	1	NaN	-4.34294e-08	1	0	0	1	NaN
NaN	NaN	25.971	25.5824	26.2108	26.052	26.8535	26.5895	NaN	NaN	NaN	NaN	25.9382	26.1012	NaN	NaN	NaN	NaN	NaN	NaN	NaN	26.1314	26.0197	NaN	0.454791	0.115217	NaN	6	6	15.4	0	10.711	21		binding;catalytic activity;cation binding;ion binding;metal ion binding;oxidoreductase activity;transition metal ion binding;zinc ion binding	cell part;integral to membrane;intrinsic to membrane;membrane part						0	1	NaN	0	1	NaN	0.223686	0.690048	-0.190132
NaN	NaN	NaN	NaN	NaN	NaN	NaN	NaN	NaN	NaN	NaN	NaN	NaN	NaN	22.6032	NaN	NaN	NaN	NaN	NaN	NaN	NaN	22.6032	NaN	NaN	NaN	NaN	1	1	2.1	0.0064131	0.41009	3	anatomical structure development;anatomical structure formation involved in morphogenesis;anatomical structure morphogenesis;angiogenesis;biological regulation;biosynthetic process;blood vessel morphogenesis;cellular biosynthetic process;cellular macromolecule biosynthetic process;cellular macromolecule metabolic process;cellular metabolic process;cellular nitrogen compound metabolic process;cell…	binding;chromatin binding;DNA binding;nucleic acid binding;nucleic acid binding transcription factor activity;protein binding;protein binding transcription factor activity;RNA polymerase II core promoter proximal region sequence-specific DNA binding transcription factor activity;RNA polymerase II core promoter proximal region sequence-specific DNA binding transcription factor activity involved in…	cell part;intracellular membrane-bounded organelle;intracellular organelle;intracellular organelle part;intracellular part;macromolecular complex;membrane-bounded organelle;nuclear part;nucleoplasm part;nucleus;organelle;organelle part;protein complex;transcription factor complex						-4.34294e-08	1	0	0	1	NaN	0	1	NaN
NaN	26.9345	26.5	27.1235	27.4007	27.1099	27.1003	26.4395	NaN	NaN	NaN	NaN	NaN	NaN	NaN	NaN	NaN	NaN	NaN	NaN	29.1202	27.1003	NaN	29.1202	0.352259	NaN	NaN	9	9	9.8	0	4.3652	26	anatomical structure development;anatomical structure morphogenesis;biological regulation;cell development;cell differentiation;cellular developmental process;cellular process;cellular process involved in reproduction;developmental process;developmental process involved in reproduction;gamete generation;germ cell development;lens fiber cell differentiation;lens morphogenesis in camera-type eye;ma…	binding;mRNA binding;nucleic acid binding;RNA binding	cell part;chromatoid body;cytoplasmic part;intracellular non-membrane-bounded organelle;intracellular organelle;intracellular organelle lumen;intracellular organelle part;intracellular part;macromolecular complex;membrane-enclosed lumen;mitochondrial matrix;mitochondrial part;non-membrane-bounded organelle;organelle;organelle lumen;organelle part;P granule;ribonucleoprotein complex;RNA granule						0	1	-2.17611	0	1	NaN	0	1	NaN
NaN	NaN	NaN	NaN	NaN	NaN	NaN	NaN	NaN	NaN	NaN	NaN	NaN	NaN	NaN	26.3953	NaN	NaN	NaN	27.2907	27.4241	NaN	26.3953	27.3574	NaN	NaN	0.0943563	3	3	14.6	0	1.3909	6		calcium channel activity;cation channel activity;cation transmembrane transporter activity;channel activity;gated channel activity;ion channel activity;ion transmembrane transporter activity;passive transmembrane transporter activity;substrate-specific channel activity;substrate-specific transmembrane transporter activity;substrate-specific transporter activity;transmembrane transporter activity;…	cell part;integral to membrane;intrinsic to membrane;membrane part	Arrhythmogenic right ventricular cardiomyopathy (ARVC);Cardiac muscle contraction;Dilated cardiomyopathy;Hypertrophic cardiomyopathy (HCM);MAPK signaling pathway					0	1	NaN	0	1	-0.962081	0	1	NaN
26.3914	NaN	NaN	NaN	NaN	24.782	NaN	NaN	NaN	NaN	NaN	NaN	NaN	NaN	NaN	NaN	NaN	NaN	NaN	NaN	NaN	25.5867	NaN	NaN	1.13801	NaN	NaN	7	7	7.5	0	7.462	10	biological regulation;cellular component organization;cellular component organization at cellular level;cellular component organization or biogenesis;cellular component organization or biogenesis at cellular level;cellular process;cytoskeleton organization;organelle organization;regulation of anatomical structure morphogenesis;regulation of biological process;regulation of cell morphogenesis;regu…		cell part;cytoplasm;cytoskeletal part;intracellular organelle part;intracellular part;macromolecular complex;microtubule;organelle part;protein complex						0	1	NaN	-4.34294e-08	1	0	0	1	NaN
24.5066	24.8946	NaN	NaN	NaN	NaN	NaN	NaN	NaN	NaN	NaN	NaN	NaN	NaN	NaN	NaN	NaN	NaN	NaN	NaN	NaN	24.7006	NaN	NaN	0.274393	NaN	NaN	5	5	4.9	0	6.726	15	biological regulation;cellular component movement;cellular component organization;cellular component organization at cellular level;cellular component organization or biogenesis;cellular component organization or biogenesis at cellular level;cellular process;cellular response to stimulus;cytoskeleton-dependent intracellular transport;establishment of Golgi localization;establishment of localizati…	binding;enzyme activator activity;enzyme regulator activity;GTPase activator activity;GTPase regulator activity;lipid binding;nucleoside-triphosphatase regulator activity;phospholipid binding	cell junction;cell part;cytoplasmic part;cytoplasmic vesicle membrane;cytoplasmic vesicle part;cytoskeleton;Golgi apparatus;Golgi apparatus part;Golgi membrane;intracellular;intracellular membrane-bounded organelle;intracellular non-membrane-bounded organelle;intracellular organelle;intracellular organelle part;intracellular part;membrane;membrane-bounded organelle;non-membrane-bounded organelle;…						0	1	NaN	-4.34294e-08	1	0	0	1	NaN
26.0167	NaN	25.644	25.8069	26.1863	25.8209	26.6964	26.2879	NaN	NaN	NaN	26.137	NaN	NaN	25.5487	24.7237	NaN	NaN	NaN	NaN	NaN	26.0167	25.5487	NaN	0.357982	0.709945	NaN	4	4	18.7	0	6.3599	19									0	1	NaN	0	1	NaN	0.98165	0.122916	-0.595814
NaN	NaN	NaN	NaN	NaN	NaN	NaN	NaN	NaN	NaN	NaN	NaN	NaN	NaN	NaN	NaN	NaN	NaN	NaN	NaN	NaN	NaN	NaN	NaN	NaN	NaN	NaN	6	1	24.6	0	1.7366	3									-4.34294e-08	1	0	-4.34294e-08	1	0	-4.34294e-08	1	0
NaN	NaN	NaN	NaN	NaN	NaN	NaN	23.3088	NaN	NaN	NaN	NaN	NaN	NaN	NaN	NaN	NaN	NaN	NaN	NaN	NaN	23.3088	NaN	NaN	NaN	NaN	NaN	1	1	7	0.00016194	0.89793	2			cell part;intracellular membrane-bounded organelle;intracellular organelle;intracellular part;membrane-bounded organelle;nucleus;organelle						0	1	NaN	-4.34294e-08	1	0	0	1	NaN
NaN	NaN	NaN	NaN	NaN	NaN	NaN	NaN	NaN	NaN	NaN	NaN	NaN	NaN	NaN	23.7585	NaN	NaN	NaN	NaN	NaN	NaN	23.7585	NaN	NaN	NaN	NaN	1	1	12.5	0.00016846	1.1144	7	carbohydrate metabolic process;cellular carbohydrate metabolic process;cellular macromolecule metabolic process;cellular metabolic process;cellular process;cellular protein metabolic process;glycosylation;macromolecule glycosylation;macromolecule metabolic process;macromolecule modification;metabolic process;peptidyl-amino acid modification;peptidyl-asparagine modification;primary metabolic proce…		cell part;integral to membrane;intrinsic to membrane;membrane part						-4.34294e-08	1	0	0	1	NaN	0	1	NaN
NaN	NaN	25.2589	24.6619	24.7787	24.8947	25.7657	25.7771	NaN	NaN	NaN	NaN	24.9207	NaN	NaN	NaN	NaN	NaN	NaN	NaN	NaN	25.0768	24.9207	NaN	0.493175	NaN	NaN	5	5	7.4	0	3.9803	13	adult behavior;adult locomotory behavior;adult walking behavior;amine metabolic process;anatomical structure development;anatomical structure morphogenesis;autophagy;axonogenesis;behavior;biological regulation;carboxylic acid metabolic process;cardiac cell development;cardiac muscle cell development;catabolic process;cell development;cell part morphogenesis;cell projection morphogenesis;cell proj…	APG12 activating enzyme activity;catalytic activity;small protein activating enzyme activity;ubiquitin activating enzyme activity	cell part;cytoplasm;intracellular part	Regulation of autophagy					0	1	NaN	0	1	NaN	0	1	-0.268736
NaN	NaN	24.367	25.6377	23.7739	23.9811	NaN	NaN	NaN	NaN	NaN	NaN	24.0339	24.0366	NaN	NaN	NaN	NaN	NaN	NaN	NaN	24.1741	24.0352	NaN	0.835475	0.00190167	NaN	6	6	4.9	0	11.436	12	biological regulation;cell cycle phase;cell cycle process;cell division;cellular component organization;cellular component organization at cellular level;cellular component organization or biogenesis;cellular component organization or biogenesis at cellular level;cellular process;mitosis;nuclear division;organelle fission;organelle organization;regulation of biological process;regulation of cell …		cell part;centrosome;cytoplasm;cytoplasmic part;cytoskeletal part;intracellular non-membrane-bounded organelle;intracellular organelle;intracellular organelle part;intracellular part;microtubule organizing center;midbody;non-membrane-bounded organelle;organelle;organelle part						0	1	NaN	0	1	NaN	0.256843	0.589428	-0.404706
NaN	NaN	NaN	NaN	NaN	NaN	25.4739	25.505	NaN	NaN	NaN	NaN	NaN	NaN	25.5835	26.3279	NaN	NaN	NaN	NaN	NaN	25.4895	25.9557	NaN	0.0219973	0.526362	NaN	4	4	25.8	0	10.392	9	ATP biosynthetic process;ATP metabolic process;biosynthetic process;cellular biosynthetic process;cellular metabolic process;cellular nitrogen compound biosynthetic process;cellular nitrogen compound metabolic process;cellular process;generation of precursor metabolites and energy;heterocycle biosynthetic process;heterocycle metabolic process;metabolic process;nitrogen compound metabolic process;…	catalytic activity;cation transmembrane transporter activity;cytochrome-c oxidase activity;heme-copper terminal oxidase activity;hydrogen ion transmembrane transporter activity;inorganic cation transmembrane transporter activity;ion transmembrane transporter activity;monovalent inorganic cation transmembrane transporter activity;oxidoreductase activity;oxidoreductase activity, acting on a heme gr…	cell part;cytoplasmic part;integral to membrane;intracellular membrane-bounded organelle;intracellular organelle;intracellular organelle part;intracellular part;intrinsic to membrane;membrane;membrane part;membrane-bounded organelle;mitochondrial inner membrane;mitochondrial membrane;mitochondrial part;mitochondrion;organelle;organelle inner membrane;organelle membrane;organelle part						0	1	NaN	0	1	NaN	0.471991	0.364147	0.4662
26.346	26.7562	26.4835	27.1575	25.7802	26.9739	27.2961	27.7055	26.3896	25.8406	NaN	27.4269	26.3566	26.7129	27.7281	27.428	NaN	NaN	26.0391	NaN	26.5946	26.865	26.7129	26.3169	0.606049	0.69885	0.392826	4	4	24.5	0	3.6531	43			cell part;cytoplasmic part;endoplasmic reticulum membrane;endoplasmic reticulum part;Golgi apparatus part;Golgi membrane;integral to membrane;intracellular organelle part;intracellular part;intrinsic to membrane;membrane;membrane part;organelle membrane;organelle part						0.502781	0.669734	0.49551	0.446035	0.612124	0.52353	0.029216	1	0.0280201
NaN	NaN	NaN	NaN	NaN	NaN	24.6486	NaN	NaN	NaN	NaN	NaN	NaN	NaN	NaN	NaN	NaN	NaN	NaN	NaN	NaN	24.6486	NaN	NaN	NaN	NaN	NaN	1	1	2.7	0	1.7538	8		binding;nucleic acid binding;nucleotide binding							0	1	NaN	-4.34294e-08	1	0	0	1	NaN
26.4817	25.9665	25.9007	26.083	26.4372	26.02	NaN	NaN	26.4492	25.9063	26.6206	NaN	26.0814	25.809	NaN	NaN	NaN	NaN	NaN	NaN	NaN	26.0515	26.0814	NaN	0.24888	0.349505	NaN	3	3	9.1	0	2.9229	24	adipose tissue development;anatomical structure development;biological regulation;cell development;cell surface receptor linked signaling pathway;cellular developmental process;cellular process;cellular process involved in reproduction;cellular response to stimulus;developmental process;developmental process involved in reproduction;female gamete generation;follicle-stimulating hormone signaling …		cell part;cytoplasm;intracellular membrane-bounded organelle;intracellular organelle;intracellular part;macromolecular complex;membrane-bounded organelle;nucleus;organelle;proteasome complex;protein complex						0	1	NaN	0	1	NaN	0.0494769	1	0.0251115
NaN	NaN	NaN	NaN	NaN	NaN	NaN	NaN	NaN	NaN	NaN	NaN	NaN	NaN	NaN	NaN	NaN	NaN	NaN	NaN	NaN	NaN	NaN	NaN	NaN	NaN	NaN	1	1	2.3	0	1.1809	1	cellular macromolecule metabolic process;cellular metabolic process;cellular process;cellular protein metabolic process;macromolecule metabolic process;macromolecule modification;metabolic process;primary metabolic process;protein metabolic process;protein modification by small protein conjugation;protein modification by small protein conjugation or removal;protein modification process;protein ub…	binding;catalytic activity;cation binding;ion binding;ligase activity;metal ion binding;transition metal ion binding;zinc ion binding	adherens junction;anchoring junction;cell junction;cell part;cell-substrate adherens junction;cell-substrate junction;centrosome;cytoplasm;cytoplasmic part;cytoskeletal part;focal adhesion;intracellular non-membrane-bounded organelle;intracellular organelle;intracellular organelle part;intracellular part;microtubule organizing center;non-membrane-bounded organelle;nuclear body;nuclear part;nuclea…	p53 signaling pathway;Ubiquitin mediated proteolysis					-4.34294e-08	1	0	-4.34294e-08	1	0	-4.34294e-08	1	0
26.2062	26.7701	NaN	25.4579	26.4557	25.2675	NaN	NaN	25.837	NaN	NaN	26.2071	NaN	25.5238	NaN	NaN	26.9127	NaN	NaN	NaN	NaN	26.2062	25.837	26.9127	0.645893	0.342014	NaN	10	4	33.7	0	1.7974	22	alternative nuclear mRNA splicing, via spliceosome;anatomical structure development;anatomical structure morphogenesis;appendage morphogenesis;biological regulation;cell differentiation;cellular component assembly;cellular component assembly at cellular level;cellular component organization;cellular component organization at cellular level;cellular component organization or biogenesis;cellular co…	binding;cation binding;double-stranded RNA binding;ion binding;metal ion binding;nucleic acid binding;RNA binding;transition metal ion binding;zinc ion binding	cell part;cytoplasm;cytoplasmic part;Golgi apparatus;intracellular membrane-bounded organelle;intracellular non-membrane-bounded organelle;intracellular organelle;intracellular part;macromolecular complex;membrane-bounded organelle;non-membrane-bounded organelle;nucleus;organelle;ribonucleoprotein complex;RNA granule;stress granule						0	1	-0.881256	0	1	-1.05678	0.164687	0.770623	-0.175527
29.0027	28.3328	29.7374	29.6441	29.7065	29.4971	30.5329	30.5681	30.1282	30.1679	29.3265	29.1818	30.4233	30.5305	31.0519	31.2162	30.4532	30.2781	30.4959	31.4368	31.6121	29.6753	30.2956	30.4959	0.737442	0.727094	0.619459	22	20	51.6	0	77.305	354	catabolic process;cellular catabolic process;cellular component assembly;cellular component organization;cellular component organization at cellular level;cellular component organization or biogenesis;cellular component organization or biogenesis at cellular level;cellular metabolic process;cellular nitrogen compound catabolic process;cellular nitrogen compound metabolic process;cellular process;…	binding;catalytic activity;GTP binding;GTPase activity;guanyl nucleotide binding;guanyl ribonucleotide binding;hydrolase activity;hydrolase activity, acting on acid anhydrides;hydrolase activity, acting on acid anhydrides, in phosphorus-containing anhydrides;identical protein binding;nucleoside-triphosphatase activity;nucleotide binding;protein binding;purine nucleotide binding;purine ribonucleos…	cell part;cytoplasmic part;endoplasmic reticulum;endoplasmic reticulum membrane;endoplasmic reticulum part;integral to membrane;intracellular membrane-bounded organelle;intracellular organelle;intracellular organelle part;intracellular part;intrinsic to membrane;membrane;membrane part;membrane-bounded organelle;organelle;organelle membrane;organelle part		+			CTX_WT	1.98767	0.0211338	-1.22752	0.81207	0.296246	-0.601925	0.960227	0.12465	0.625592
NaN	NaN	23.3552	27.6255	25.2622	25.4404	24.9789	23.6752	NaN	25.9418	NaN	NaN	24.5898	24.7003	29.2716	29.3256	NaN	NaN	25.5328	30.8448	30.1115	25.1206	25.9418	30.1115	1.52302	2.37232	2.87862	13	13	9.3	0	11.812	50	adult behavior;adult locomotory behavior;adult walking behavior;anatomical structure development;anatomical structure formation involved in morphogenesis;anatomical structure morphogenesis;associative learning;axonogenesis;behavior;biological regulation;calcium ion homeostasis;calcium ion import;calcium ion transmembrane transport;calcium ion transport;calcium ion-dependent exocytosis;cAMP-mediat…	binding;calcium channel activity;cation binding;cation channel activity;cation transmembrane transporter activity;channel activity;gated channel activity;high voltage-gated calcium channel activity;ion binding;ion channel activity;ion transmembrane transporter activity;metal ion binding;passive transmembrane transporter activity;substrate-specific channel activity;substrate-specific transmembrane…	calcium channel complex;cation channel complex;caveolar macromolecular signaling complex;cell body;cell part;cell projection part;contractile fiber part;cytoplasmic part;cytoskeletal part;dendritic shaft;endoplasmic reticulum;I band;integral to membrane;integral to plasma membrane;intracellular membrane-bounded organelle;intracellular organelle;intracellular organelle part;intracellular part;intr…	Alzheimer's disease;Arrhythmogenic right ventricular cardiomyopathy (ARVC);Calcium signaling pathway;Carbohydrate digestion and absorption;Cardiac muscle contraction;Dilated cardiomyopathy;GnRH signaling pathway;Hypertrophic cardiomyopathy (HCM);Long-term potentiation;MAPK signaling pathway;Type II diabetes mellitus;Vascular smooth muscle contraction	+			CTX_WT	1.48865	0.0314	-3.77347	0.507826	0.435941	-2.06386	0.742495	0.135745	1.70961
25.4132	25.4094	27.8819	27.9265	27.4692	27.5412	28.3031	28.8391	27.2306	27.2526	26.5674	26.478	26.9117	26.8636	26.7498	26.2601	NaN	NaN	25.8823	26.3248	NaN	27.7116	26.8067	26.1035	1.27105	0.350032	0.312832	19	18	26.8	0	17.465	62	biological regulation;catabolic process;cellular catabolic process;cellular localization;cellular macromolecule catabolic process;cellular macromolecule localization;cellular macromolecule metabolic process;cellular metabolic process;cellular process;cellular protein localization;cellular protein metabolic process;localization;macromolecule catabolic process;macromolecule localization;macromolecu…	binding;catalytic activity;cation binding;cysteine-type peptidase activity;hydrolase activity;hydrolase activity, acting on ester bonds;ion binding;metal ion binding;peptidase activity;peptidase activity, acting on L-amino acid peptides;small conjugating protein-specific protease activity;thiolester hydrolase activity;ubiquitin thiolesterase activity;ubiquitin-specific protease activity	cell part;cytoplasm;intracellular membrane-bounded organelle;intracellular organelle;intracellular part;membrane-bounded organelle;nucleus;organelle						0.649909	0.397038	1.24442	1.43899	0.09072	0.685685	0.601131	0.261306	-0.55874
NaN	NaN	NaN	NaN	22.6236	NaN	NaN	NaN	NaN	NaN	NaN	NaN	NaN	NaN	NaN	NaN	NaN	NaN	NaN	NaN	NaN	22.6236	NaN	NaN	NaN	NaN	NaN	1	1	1.5	0	2.3224	1	biological adhesion;cell adhesion;cell-cell adhesion;cellular process;homophilic cell adhesion	binding;calcium ion binding;cation binding;ion binding;metal ion binding	cell part;integral to membrane;integral to plasma membrane;intrinsic to membrane;intrinsic to plasma membrane;membrane part;plasma membrane part						0	1	NaN	-4.34294e-08	1	0	0	1	NaN
NaN	NaN	NaN	NaN	NaN	24.714	NaN	NaN	NaN	NaN	NaN	NaN	NaN	NaN	NaN	NaN	NaN	NaN	NaN	NaN	NaN	24.714	NaN	NaN	NaN	NaN	NaN	1	1	5.8	0.0045669	0.45348	2	developmental process;multicellular organismal development;multicellular organismal process	receptor activity	cell part;membrane						0	1	NaN	-4.34294e-08	1	0	0	1	NaN
NaN	NaN	NaN	NaN	NaN	NaN	NaN	22.4934	NaN	NaN	NaN	NaN	NaN	NaN	NaN	NaN	NaN	NaN	NaN	NaN	NaN	22.4934	NaN	NaN	NaN	NaN	NaN	1	1	2.4	0.001406	0.71248	3	cell cycle phase;cell cycle process;cell division;cellular component organization;cellular component organization at cellular level;cellular component organization or biogenesis;cellular component organization or biogenesis at cellular level;cellular process;mitosis;nuclear division;organelle fission;organelle organization		cell part;chromosomal part;condensed chromosome kinetochore;intracellular membrane-bounded organelle;intracellular non-membrane-bounded organelle;intracellular organelle;intracellular organelle part;intracellular part;kinetochore;macromolecular complex;membrane-bounded organelle;Ndc80 complex;non-membrane-bounded organelle;nucleus;organelle;organelle part;protein complex						0	1	NaN	-4.34294e-08	1	0	0	1	NaN
26.1248	26.1389	25.4706	NaN	NaN	26.0832	NaN	NaN	NaN	NaN	NaN	NaN	NaN	NaN	NaN	NaN	NaN	NaN	NaN	NaN	NaN	26.104	NaN	NaN	0.323376	NaN	NaN	3	3	11.4	0.0010974	0.72441	5	apoptosis;biological regulation;cation transport;cell communication;cell death;cellular component assembly;cellular component organization;cellular component organization or biogenesis;cellular process;cellular response to biotic stimulus;cellular response to chemical stimulus;cellular response to cytokine stimulus;cellular response to external stimulus;cellular response to extracellular stimulus…	binding;cation binding;ion binding;iron ion binding;metal ion binding;transition metal ion binding;transporter activity	cell part;cytoplasmic part;cytosol;extracellular region;extracellular region part;extracellular space;intracellular part						0	1	NaN	-4.34294e-08	1	0	0	1	NaN
NaN	NaN	NaN	NaN	NaN	NaN	NaN	NaN	NaN	NaN	NaN	NaN	NaN	NaN	NaN	25.5296	NaN	NaN	NaN	NaN	NaN	NaN	25.5296	NaN	NaN	NaN	NaN	1	1	25.6	0	1.9773	13	biological regulation;cellular process;cellular response to stimulus;intracellular signal transduction;regulation of biological process;regulation of cellular process;response to stimulus;signal transduction		cell part;cytoplasmic part;endoplasmic reticulum;integral to membrane;intracellular membrane-bounded organelle;intracellular organelle;intracellular part;intrinsic to membrane;membrane part;membrane-bounded organelle;organelle						-4.34294e-08	1	0	0	1	NaN	0	1	NaN
NaN	24.4107	NaN	NaN	NaN	NaN	NaN	NaN	NaN	NaN	NaN	NaN	NaN	NaN	NaN	NaN	NaN	NaN	NaN	NaN	NaN	24.4107	NaN	NaN	NaN	NaN	NaN	3	3	3.9	0	3.3725	4	biological regulation;cellular process;cellular response to stimulus;intracellular signal transduction;positive regulation of catalytic activity;positive regulation of GTPase activity;positive regulation of hydrolase activity;positive regulation of molecular function;positive regulation of Rap GTPase activity;positive regulation of Ras GTPase activity;regulation of biological process;regulation o…	enzyme activator activity;enzyme regulator activity;GTPase activator activity;GTPase regulator activity;guanyl-nucleotide exchange factor activity;nucleoside-triphosphatase regulator activity;Rap GTPase activator activity;Rap guanyl-nucleotide exchange factor activity;Ras GTPase activator activity;Ras guanyl-nucleotide exchange factor activity;small GTPase regulator activity	cell part;intracellular;membrane;plasma membrane	MAPK signaling pathway					0	1	NaN	-4.34294e-08	1	0	0	1	NaN
25.1724	24.8515	24.8804	24.3079	NaN	NaN	NaN	NaN	NaN	NaN	NaN	NaN	NaN	NaN	NaN	NaN	NaN	NaN	NaN	NaN	NaN	24.866	NaN	NaN	0.360533	NaN	NaN	3	3	17.3	0.0022772	0.59024	4		actin binding;actin filament binding;binding;calcium ion binding;cation binding;cytoskeletal protein binding;ion binding;metal ion binding;protein binding	actin filament;adherens junction;anchoring junction;cell junction;cell part;cell projection membrane;cell projection part;cell-substrate adherens junction;cell-substrate junction;cytoplasm;cytoskeletal part;focal adhesion;intracellular organelle part;intracellular part;leading edge membrane;macromolecular complex;membrane part;organelle part;plasma membrane part;protein complex;ruffle membrane						0	1	NaN	-4.34294e-08	1	0	0	1	NaN
25.1764	25.3585	26.9316	26.6417	27.6842	27.5821	28.5393	27.8867	26.3353	25.8219	25.5136	25.6442	26.3688	26.5995	26.5983	26.0885	NaN	NaN	NaN	26.2211	NaN	27.2568	26.2119	26.2211	1.20184	0.422728	NaN	19	19	17.9	0	18.065	77	biological regulation;positive regulation of catalytic activity;positive regulation of GTPase activity;positive regulation of hydrolase activity;positive regulation of molecular function;regulation of biological process;regulation of catabolic process;regulation of catalytic activity;regulation of cellular catabolic process;regulation of cellular metabolic process;regulation of cellular process;r…	binding;enzyme activator activity;enzyme regulator activity;GTPase activator activity;GTPase regulator activity;nucleoside-triphosphatase regulator activity;protein binding;protein dimerization activity;protein heterodimerization activity	cell part;cytoplasm;intracellular part;membrane;plasma membrane						0	1	0.753996	0	1	-0.099813	1.10315	0.0771732	-0.853809
NaN	NaN	NaN	25.367	NaN	NaN	NaN	NaN	NaN	NaN	NaN	NaN	NaN	NaN	NaN	NaN	NaN	NaN	NaN	NaN	NaN	25.367	NaN	NaN	NaN	NaN	NaN	23	0	25.3	0.0001645	0.9643	7		adenyl nucleotide binding;adenyl ribonucleotide binding;ATP binding;binding;catalytic activity;enzyme regulator activity;GTPase regulator activity;kinase activity;nucleoside-triphosphatase regulator activity;nucleotide binding;phosphotransferase activity, alcohol group as acceptor;protein kinase activity;protein serine/threonine kinase activity;purine nucleotide binding;purine ribonucleoside trip…		MAPK signaling pathway					0	1	NaN	-4.34294e-08	1	0	0	1	NaN
24.5607	26.2824	26.3863	26.6257	26.7605	26.5979	26.7752	26.8286	25.8219	NaN	NaN	25.5716	25.5157	NaN	NaN	NaN	NaN	NaN	NaN	NaN	NaN	26.6118	25.5716	NaN	0.748648	0.163062	NaN	5	5	21.2	0	3.1395	26	biological regulation;cell redox homeostasis;cellular homeostasis;cellular process;homeostatic process;regulation of biological process;regulation of biological quality;regulation of cellular process		cell part;centrosome;cytoplasm;cytoplasmic part;cytoskeletal part;intracellular membrane-bounded organelle;intracellular non-membrane-bounded organelle;intracellular organelle;intracellular organelle part;intracellular part;membrane-bounded organelle;microtubule organizing center;midbody;non-membrane-bounded organelle;nucleus;organelle;organelle part						0	1	NaN	0	1	NaN	0.835131	0.146228	-0.715761
NaN	NaN	26.9907	NaN	26.792	26.622	NaN	NaN	NaN	NaN	NaN	NaN	NaN	NaN	NaN	NaN	26.1315	25.989	NaN	NaN	NaN	26.792	NaN	26.0603	0.184565	NaN	0.100748	5	1	46.2	0	9.4336	22					+			CTX_WT	1.81916	0.0485414	0.74131	0	1	NaN	0	0.959661	NaN
NaN	NaN	NaN	NaN	NaN	NaN	NaN	NaN	NaN	25.4732	NaN	NaN	NaN	NaN	NaN	NaN	NaN	NaN	NaN	NaN	NaN	NaN	25.4732	NaN	NaN	NaN	NaN	3	3	16.3	0	3.2421	9		binding;catalytic activity;cation binding;ion binding;metal ion binding;oxidoreductase activity;transition metal ion binding;zinc ion binding	cell part;cytoplasmic part;intracellular membrane-bounded organelle;intracellular organelle;intracellular part;membrane-bounded organelle;mitochondrion;organelle						-4.34294e-08	1	0	0	1	NaN	0	1	NaN
29.9683	30.0349	29.847	30.5205	29.4015	29.2779	28.5437	28.6216	29.7234	29.9439	30.6125	30.6547	29.6396	29.7873	27.9385	27.9053	28.7864	28.6369	NaN	27.1327	NaN	29.6242	29.7553	28.6369	0.697594	1.06208	0.914654	5	5	85.3	0	25.296	87	biological regulation;cation homeostasis;cation transport;cellular cation homeostasis;cellular chemical homeostasis;cellular copper ion homeostasis;cellular homeostasis;cellular ion homeostasis;cellular process;chemical homeostasis;copper ion homeostasis;copper ion transport;establishment of localization;homeostatic process;ion homeostasis;ion transport;metal ion transport;regulation of biologica…	binding;cation binding;copper chaperone activity;copper ion binding;ion binding;metal ion binding;metallochaperone activity;transition metal ion binding		Mineral absorption	+			CTX_WT	1.56841	0.0451144	1.34158	1.0602	0.122791	1.34033	0.000947964	1	-0.00124979
NaN	NaN	NaN	NaN	23.5359	NaN	NaN	NaN	NaN	NaN	NaN	NaN	NaN	NaN	NaN	NaN	NaN	NaN	NaN	NaN	NaN	23.5359	NaN	NaN	NaN	NaN	NaN	1	1	14.9	0	1.2914	1									0	1	NaN	-4.34294e-08	1	0	0	1	NaN
27.8987	27.9943	28.8143	29.0141	28.4141	28.7202	29.3183	29.1697	28.6598	28.5774	28.306	28.7782	28.8244	28.8447	29.7508	29.8017	29.1622	29.2437	29.7435	30.0343	29.4925	28.7672	28.8013	29.4925	0.524918	0.542522	0.360016	23	23	52.3	0	36.964	251	biological regulation;biosynthetic process;carboxylic acid biosynthetic process;carboxylic acid metabolic process;cellular biosynthetic process;cellular ketone metabolic process;cellular lipid metabolic process;cellular metabolic process;cellular process;cellular response to chemical stimulus;cellular response to cytokine stimulus;cellular response to hypoxia;cellular response to interleukin-1;ce…	binding;catalytic activity;cation binding;electron carrier activity;heme binding;intramolecular oxidoreductase activity;ion binding;iron ion binding;isomerase activity;metal ion binding;monooxygenase activity;oxidoreductase activity;oxidoreductase activity, acting on paired donors, with incorporation or reduction of molecular oxygen;prostaglandin-I synthase activity;tetrapyrrole binding;transitio…	caveola;cell part;cytoplasmic part;endoplasmic reticulum;endoplasmic reticulum membrane;endoplasmic reticulum part;extracellular region part;extracellular space;integral to membrane;intracellular membrane-bounded organelle;intracellular organelle;intracellular organelle part;intracellular part;intrinsic to membrane;membrane;membrane part;membrane raft;membrane-bounded organelle;nucleus;organelle;…	Arachidonic acid metabolism	+			CTX_WT	2.09253	0.0275235	-0.867291	1.25944	0.144881	-0.592363	0.49426	0.409755	0.274928
NaN	NaN	NaN	NaN	NaN	NaN	NaN	NaN	NaN	NaN	NaN	NaN	NaN	NaN	NaN	NaN	NaN	26.4012	NaN	NaN	NaN	NaN	NaN	26.4012	NaN	NaN	NaN	1	1	6.3	0.00078927	0.76027	2	cellular process;establishment of localization;establishment of protein localization;protein transport;transport;vesicle-mediated transport		cell part;integral to membrane;intrinsic to membrane;membrane part						0	1	NaN	0	1	NaN	-4.34294e-08	1	0
NaN	NaN	NaN	NaN	NaN	NaN	24.8289	NaN	NaN	NaN	NaN	NaN	NaN	NaN	NaN	26.3225	NaN	NaN	NaN	NaN	NaN	24.8289	26.3225	NaN	NaN	NaN	NaN	2	2	2.3	0.00063553	0.79107	3			cell part;integral to membrane;intrinsic to membrane;membrane part						0	1	NaN	0	1	NaN	0	1	1.49363
31.125	30.9163	31.8754	31.7586	32.0997	31.8873	32.1689	31.9434	31.2595	30.9181	30.8473	31.0044	31.4548	31.613	31.7952	31.5928	30.9495	30.9885	30.17	30.9609	30.7214	31.8813	31.3572	30.9495	0.455004	0.356939	0.345719	20	9	55.9	0	78.073	460	biological regulation;cellular macromolecule metabolic process;cellular metabolic process;cellular nitrogen compound metabolic process;cellular process;macromolecule metabolic process;metabolic process;mRNA metabolic process;mRNA processing;nitrogen compound metabolic process;nucleic acid metabolic process;nucleobase-containing compound metabolic process;primary metabolic process;regulation of bi…	binding;nucleic acid binding;nucleotide binding;RNA binding	actin cytoskeleton;catalytic step 2 spliceosome;cell part;cytoplasm;cytoskeleton;intracellular non-membrane-bounded organelle;intracellular organelle;intracellular organelle part;intracellular part;macromolecular complex;non-membrane-bounded organelle;nuclear part;nucleoplasm;organelle;organelle part;ribonucleoprotein complex;spliceosomal complex		+			CTX_WT	2.70944	0.00911521	0.963772	1.72108	0.0789071	0.552565	1.19402	0.122487	-0.411208
NaN	NaN	NaN	NaN	NaN	NaN	NaN	NaN	NaN	NaN	NaN	NaN	NaN	NaN	NaN	26.7474	NaN	NaN	NaN	NaN	NaN	NaN	26.7474	NaN	NaN	NaN	NaN	6	1	42.5	0.00063321	0.76972	4									-4.34294e-08	1	0	0	1	NaN	0	1	NaN
NaN	NaN	NaN	NaN	NaN	NaN	NaN	NaN	26.8335	28.287	NaN	NaN	NaN	NaN	NaN	NaN	28.3055	28.2503	NaN	NaN	NaN	NaN	27.5602	28.2779	NaN	1.02774	0.0390179	7	7	2.9	0	3.1329	12	biological regulation;cellular process;cellular response to stimulus;endosome transport;establishment of localization;establishment of localization in cell;intracellular transport;localization;macromolecule localization;protein localization;regulation of biological process;regulation of cellular process;response to stimulus;signal transduction;transport;vesicle-mediated transport	binding;protein binding;protein kinase A binding	cell part;cytoplasmic membrane-bounded vesicle;cytoplasmic part;cytoplasmic vesicle;endoplasmic reticulum;Golgi apparatus;Golgi apparatus part;integral to membrane;intracellular membrane-bounded organelle;intracellular organelle;intracellular organelle part;intracellular part;intrinsic to membrane;lysosome;lytic vacuole;membrane;membrane part;membrane-bounded organelle;membrane-bounded vesicle;or…						0	1	NaN	0.36882	0.686203	-0.717689	0	1	NaN
25.9687	NaN	NaN	NaN	NaN	NaN	NaN	NaN	NaN	NaN	NaN	NaN	NaN	NaN	NaN	NaN	NaN	NaN	NaN	NaN	NaN	25.9687	NaN	NaN	NaN	NaN	NaN	1	1	2.6	0.0026966	0.53266	16	alcohol metabolic process;amine biosynthetic process;amine metabolic process;biosynthetic process;CDP-choline pathway;cellular amine metabolic process;cellular biogenic amine biosynthetic process;cellular biogenic amine metabolic process;cellular biosynthetic process;cellular lipid metabolic process;cellular metabolic process;cellular nitrogen compound biosynthetic process;cellular nitrogen compo…	binding;catalytic activity;cation binding;CDP-alcohol phosphatidyltransferase activity;diacylglycerol cholinephosphotransferase activity;ethanolaminephosphotransferase activity;ion binding;metal ion binding;phosphotransferase activity, for other substituted phosphate groups;transferase activity;transferase activity, transferring phosphorus-containing groups	cell part;cytoplasmic part;endoplasmic reticulum membrane;endoplasmic reticulum part;integral to membrane;intracellular organelle part;intracellular part;intrinsic to membrane;membrane;membrane part;nuclear membrane;nuclear part;organelle membrane;organelle part	Ether lipid metabolism;Glycerophospholipid metabolism;Phosphonate and phosphinate metabolism					0	1	NaN	-4.34294e-08	1	0	0	1	NaN
NaN	NaN	NaN	NaN	NaN	NaN	NaN	NaN	NaN	NaN	NaN	22.8622	NaN	NaN	NaN	NaN	NaN	NaN	NaN	NaN	NaN	NaN	22.8622	NaN	NaN	NaN	NaN	1	1	42	0.00063704	0.8022	3	biological regulation;negative regulation of biological process;negative regulation of biosynthetic process;negative regulation of cellular biosynthetic process;negative regulation of cellular macromolecule biosynthetic process;negative regulation of cellular metabolic process;negative regulation of cellular process;negative regulation of gene expression;negative regulation of intracellular prote…	cAMP-dependent protein kinase inhibitor activity;enzyme inhibitor activity;enzyme regulator activity;kinase inhibitor activity;kinase regulator activity;protein kinase inhibitor activity;protein kinase regulator activity;protein serine/threonine kinase inhibitor activity	cell part;cytoplasm;intracellular membrane-bounded organelle;intracellular organelle;intracellular part;membrane-bounded organelle;nucleus;organelle						-4.34294e-08	1	0	0	1	NaN	0	1	NaN
26.9637	25.8138	26.6161	25.3546	25.1314	25.2012	NaN	NaN	NaN	NaN	26.3695	25.5064	25.1224	NaN	26.7414	25.771	NaN	NaN	NaN	NaN	25.9083	25.5842	25.771	25.9083	0.77602	0.652777	NaN	6	6	8.3	0	3.067	17	adaptive immune response;adaptive immune response based on somatic recombination of immune receptors built from immunoglobulin superfamily domains;anatomical structure development;B cell activation;B cell differentiation;biological adhesion;biological regulation;cell activation;cell adhesion;cell adhesion mediated by integrin;cell differentiation;cell migration;cell motility;cell surface receptor…	binding;catalytic activity;cation binding;endopeptidase activity;hydrolase activity;ion binding;metal ion binding;metalloendopeptidase activity;metallopeptidase activity;peptidase activity;peptidase activity, acting on L-amino acid peptides;transition metal ion binding;zinc ion binding	actin cytoskeleton;adherens junction;anchoring junction;apical plasma membrane;cell junction;cell part;cell projection membrane;cell projection part;cell surface;cell-cell junction;cell-substrate adherens junction;cell-substrate junction;cytoplasm;cytoskeleton;extracellular region;focal adhesion;integral to membrane;integral to plasma membrane;intracellular non-membrane-bounded organelle;intracel…	Alzheimer's disease;Epithelial cell signaling in Helicobacter pylori infection;Notch signaling pathway					0	1	-0.0615171	0	1	-0.00619698	0.0446308	1	0.0553201
NaN	NaN	NaN	NaN	NaN	NaN	NaN	24.1505	NaN	NaN	NaN	NaN	NaN	NaN	NaN	NaN	NaN	NaN	NaN	NaN	NaN	24.1505	NaN	NaN	NaN	NaN	NaN	1	1	5.4	0.00016852	1.1148	1	cellular metabolic process;cellular process;electron transport chain;generation of precursor metabolites and energy;metabolic process;oxidation-reduction process	binding;cation binding;ion binding;metal ion binding	cell part;integral to membrane;intrinsic to membrane;membrane part						0	1	NaN	-4.34294e-08	1	0	0	1	NaN
29.3821	28.3312	27.6213	28.2359	28.16	27.9813	28.2474	28.8519	27.6954	28.2128	28.7813	28.7806	28.0692	NaN	28.9387	28.5335	28.7134	28.9344	NaN	29.0357	28.9387	28.2417	28.5335	28.9366	0.540369	0.453269	0.136379	11	11	18.3	0	10.819	49	biological adhesion;biological regulation;cell adhesion;cell projection organization;cell surface receptor linked signaling pathway;cell-cell adhesion;cellular component organization;cellular component organization at cellular level;cellular component organization or biogenesis;cellular component organization or biogenesis at cellular level;cellular process;cellular response to stimulus;homotypic…	binding;carbohydrate binding;glycosaminoglycan binding;heparin binding;pattern binding;polysaccharide binding	anchored to membrane;axon;cell body;cell part;cell projection;cell projection part;external side of plasma membrane;growth cone;integral to membrane;intrinsic to membrane;membrane part;neuron projection;neuronal cell body;plasma membrane part;site of polarized growth	Cell adhesion molecules (CAMs);Prion diseases					1.11622	0.22839	-0.554173	1.11909	0.209926	-0.475354	0.115527	0.892894	0.0788187
NaN	23.3731	NaN	NaN	NaN	NaN	NaN	NaN	NaN	NaN	NaN	NaN	NaN	NaN	NaN	NaN	NaN	NaN	NaN	NaN	NaN	23.3731	NaN	NaN	NaN	NaN	NaN	5	5	7	0	4.244	7			cell part;cytoplasm;cytoskeletal part;intracellular organelle part;intracellular part;macromolecular complex;microtubule;organelle part;protein complex						0	1	NaN	-4.34294e-08	1	0	0	1	NaN
NaN	25.8801	NaN	NaN	25.4808	NaN	NaN	NaN	NaN	NaN	26.3819	25.9837	NaN	25.2787	NaN	NaN	NaN	NaN	NaN	NaN	NaN	25.6805	25.9837	NaN	0.282376	0.558696	NaN	5	5	8.6	0	1.963	7	activation of MAPKK activity;activation of protein kinase activity;biological adhesion;biological regulation;cell activation;cell adhesion;cell adhesion mediated by integrin;cell differentiation;cell surface receptor linked signaling pathway;cell-cell adhesion;cell-cell adhesion mediated by integrin;cell-matrix adhesion;cell-substrate adhesion;cellular developmental process;cellular macromolecule…	binding;catalytic activity;cation binding;endopeptidase activity;hydrolase activity;ion binding;metal ion binding;metalloendopeptidase activity;metallopeptidase activity;peptidase activity;peptidase activity, acting on L-amino acid peptides;protein binding;protein domain specific binding;SH3 domain binding;transition metal ion binding;zinc ion binding	cell part;cytoplasm;extracellular region part;extracellular space;integral to membrane;intracellular part;intrinsic to external side of plasma membrane;intrinsic to membrane;intrinsic to plasma membrane;membrane;membrane part;plasma membrane;plasma membrane part						0	0.926018	NaN	0	0.892115	NaN	0.167259	0.759801	0.200974
NaN	NaN	NaN	NaN	NaN	NaN	NaN	23.4686	NaN	NaN	NaN	NaN	NaN	NaN	NaN	NaN	NaN	NaN	NaN	NaN	NaN	23.4686	NaN	NaN	NaN	NaN	NaN	3	3	4.9	0.00016573	1.0135	4	biological regulation;biosynthetic process;cell differentiation;cell differentiation in spinal cord;cellular biosynthetic process;cellular component assembly;cellular component organization;cellular component organization or biogenesis;cellular developmental process;cellular macromolecule biosynthetic process;cellular macromolecule metabolic process;cellular metabolic process;cellular nitrogen co…	5'-3' DNA helicase activity;5'-3' RNA helicase activity;adenyl nucleotide binding;adenyl ribonucleotide binding;ATP binding;ATPase activity;ATPase activity, coupled;ATP-dependent 5'-3' DNA helicase activity;ATP-dependent 5'-3' RNA helicase activity;ATP-dependent DNA helicase activity;ATP-dependent helicase activity;ATP-dependent RNA helicase activity;binding;catalytic activity;cation binding;DNA …	axon;cell body;cell part;cell projection;cell projection part;cytoplasmic part;growth cone;intracellular membrane-bounded organelle;intracellular organelle;intracellular part;macromolecular complex;membrane-bounded organelle;neuron projection;neuronal cell body;nucleus;organelle;perinuclear region of cytoplasm;ribonucleoprotein complex;site of polarized growth						0	1	NaN	-4.34294e-08	1	0	0	1	NaN
NaN	NaN	26.1539	27.0332	26.2876	26.2293	25.7131	NaN	NaN	NaN	NaN	NaN	NaN	NaN	NaN	NaN	NaN	NaN	NaN	NaN	NaN	26.2293	NaN	NaN	0.476228	NaN	NaN	2	2	16.5	0	6.9629	9	behavior;biosynthetic process;cellular biosynthetic process;cellular metabolic compound salvage;cellular metabolic process;cellular nitrogen compound biosynthetic process;cellular nitrogen compound metabolic process;cellular process;cellular response to chemical stimulus;cellular response to oxygen levels;cellular response to stimulus;CTP biosynthetic process;CTP metabolic process;CTP salvage;fee…	adenyl nucleotide binding;adenyl ribonucleotide binding;ATP binding;binding;catalytic activity;kinase activity;nucleobase-containing compound kinase activity;nucleoside kinase activity;nucleotide binding;phosphotransferase activity, alcohol group as acceptor;purine nucleotide binding;purine ribonucleoside triphosphate binding;purine ribonucleotide binding;ribonucleotide binding;transferase activi…	cell part;cytoplasmic part;cytosol;intracellular membrane-bounded organelle;intracellular organelle;intracellular part;membrane-bounded organelle;organelle	Drug metabolism - other enzymes;Pyrimidine metabolism					0	1	NaN	-4.34294e-08	1	0	0	1	NaN
NaN	NaN	NaN	NaN	NaN	NaN	NaN	NaN	NaN	NaN	NaN	NaN	NaN	NaN	NaN	NaN	NaN	NaN	NaN	NaN	24.2642	NaN	NaN	24.2642	NaN	NaN	NaN	2	2	7.3	0.0019838	0.61492	4	acute inflammatory response;acute inflammatory response to antigenic stimulus;adaptive immune response;adaptive immune response based on somatic recombination of immune receptors built from immunoglobulin superfamily domains;amine transport;antibody-dependent cellular cytotoxicity;antigen processing and presentation;antigen processing and presentation of exogenous antigen;antigen processing and p…	binding;IgG binding;IgG receptor activity;immunoglobulin binding;immunoglobulin receptor activity;molecular transducer activity;protein binding;protein complex binding;receptor activity;receptor signaling protein activity;signal transducer activity;signaling receptor activity;transmembrane signaling receptor activity	cell part;cytoplasm;cytoskeleton;external side of plasma membrane;extracellular region;integral to membrane;integral to plasma membrane;intracellular non-membrane-bounded organelle;intracellular organelle;intracellular part;intrinsic to membrane;intrinsic to plasma membrane;membrane;membrane part;non-membrane-bounded organelle;organelle;plasma membrane;plasma membrane part	Fc gamma R-mediated phagocytosis;ko05152;Measles;Osteoclast differentiation;Phagosome;Staphylococcus aureus infection;Systemic lupus erythematosus					0	1	NaN	0	1	NaN	-4.34294e-08	1	0
NaN	NaN	25.5875	NaN	NaN	NaN	25.6346	25.9904	NaN	NaN	NaN	NaN	NaN	NaN	NaN	NaN	NaN	NaN	NaN	NaN	NaN	25.6346	NaN	NaN	0.220292	NaN	NaN	7	7	7.5	0	4.7571	15	biological adhesion;biological regulation;cell adhesion;cell migration;cell motility;cell surface receptor linked signaling pathway;cellular component movement;cellular process;cellular response to stimulus;integrin-mediated signaling pathway;locomotion;regulation of biological process;regulation of cellular process;response to stimulus;signal transduction;substrate-dependent cell migration	binding;cation binding;ion binding;metal ion binding	cell part;integrin complex;macromolecular complex;membrane part;plasma membrane part;protein complex;receptor complex						0	1	NaN	-4.34294e-08	1	0	0	1	NaN
33.8638	33.722	32.9188	32.9624	32.9873	32.9549	32.8587	32.8078	32.8084	32.7869	33.5702	33.6361	32.2975	32.4928	32.8074	33.0616	32.963	32.6906	31.3149	32.3163	32.0924	32.9587	32.8079	32.3163	0.412301	0.473165	0.633035	25	5	73	0	125.29	850		binding;calcium ion binding;cation binding;ion binding;metal ion binding	cell part;cytoplasmic membrane-bounded vesicle;cytoplasmic part;cytoplasmic vesicle;endoplasmic reticulum;endoplasmic reticulum lumen;endoplasmic reticulum part;extracellular region;intracellular membrane-bounded organelle;intracellular organelle;intracellular organelle lumen;intracellular organelle part;intracellular part;melanosome;membrane-bounded organelle;membrane-bounded vesicle;membrane-en…		+			CTX_WT	1.91043	0.0386751	0.858994	1.26037	0.132874	0.657159	0.422028	0.503985	-0.201834
NaN	NaN	NaN	NaN	NaN	NaN	NaN	NaN	NaN	NaN	NaN	NaN	NaN	22.7709	NaN	NaN	NaN	NaN	NaN	NaN	NaN	NaN	22.7709	NaN	NaN	NaN	NaN	3	3	8.9	0	1.8942	2	biological regulation;biosynthetic process;cellular biosynthetic process;cellular macromolecule biosynthetic process;cellular macromolecule metabolic process;cellular metabolic process;cellular nitrogen compound metabolic process;cellular process;macromolecule biosynthetic process;macromolecule metabolic process;metabolic process;negative regulation of biological process;negative regulation of bi…	binding;DNA binding;nucleic acid binding;nucleic acid binding transcription factor activity;sequence-specific DNA binding;sequence-specific DNA binding transcription factor activity	cell part;cytoplasm;intracellular membrane-bounded organelle;intracellular organelle;intracellular part;membrane-bounded organelle;nucleus;organelle						-4.34294e-08	1	0	0	1	NaN	0	1	NaN
NaN	NaN	NaN	25.9849	NaN	NaN	26.5333	26.4159	25.157	NaN	NaN	NaN	25.9646	25.5775	26.0147	25.9659	NaN	NaN	NaN	NaN	NaN	26.4159	25.9646	NaN	0.288727	0.368479	NaN	6	6	23.9	0	2.9385	14			cell part;intracellular part;macromolecular complex;protein complex;ubiquitin ligase complex						0	1	NaN	0	1	NaN	1.2085	0.0839733	-0.575434
29.7603	29.6886	29.6341	29.8494	29.8085	29.4398	29.4421	29.2463	29.5628	29.5037	29.0616	29.3639	29.3492	29.3327	28.219	28.5196	29.135	28.9684	29.2877	28.7027	28.0276	29.6614	29.3409	28.9684	0.212301	0.489307	0.495365	27	27	69.5	0	54.131	217	anatomical structure development;blastocyst development;catabolic process;developmental process;macromolecule catabolic process;macromolecule metabolic process;metabolic process;primary metabolic process;protein catabolic process;protein metabolic process	adenyl nucleotide binding;adenyl ribonucleotide binding;ATP binding;binding;catalytic activity;hydrolase activity;hydrolase activity, acting on acid anhydrides;hydrolase activity, acting on acid anhydrides, in phosphorus-containing anhydrides;nucleoside-triphosphatase activity;nucleotide binding;purine nucleotide binding;purine ribonucleoside triphosphate binding;purine ribonucleotide binding;pyr…	cell part;cytoplasm;cytoplasmic mRNA processing body;cytoplasmic part;intracellular membrane-bounded organelle;intracellular non-membrane-bounded organelle;intracellular organelle;intracellular part;macromolecular complex;membrane-bounded organelle;non-membrane-bounded organelle;nucleus;organelle;perinuclear region of cytoplasm;proteasome accessory complex;protein complex;ribonucleoprotein comple…	Proteasome	+			CTX_WT	2.68568	0.014435	0.784368	0.490442	0.658119	0.289779	1.69747	0.0527995	-0.494588
NaN	NaN	24.8797	25.4519	NaN	25.2667	25.4819	26.1015	NaN	NaN	NaN	NaN	NaN	NaN	NaN	NaN	NaN	NaN	NaN	NaN	NaN	25.4519	NaN	NaN	0.442537	NaN	NaN	3	3	13.2	0	2.3626	10									0	1	NaN	-4.34294e-08	1	0	0	1	NaN
NaN	NaN	NaN	NaN	NaN	NaN	23.0035	NaN	NaN	NaN	NaN	NaN	NaN	NaN	NaN	NaN	NaN	NaN	NaN	NaN	NaN	23.0035	NaN	NaN	NaN	NaN	NaN	1	1	2	0.0026962	0.53264	1			cell part;intracellular membrane-bounded organelle;intracellular organelle;intracellular part;membrane-bounded organelle;nucleus;organelle						0	1	NaN	-4.34294e-08	1	0	0	1	NaN
27.5764	27.6113	27.7161	28.3622	28.3441	28.578	28.4574	28.5337	28.2846	28.457	27.9957	28.2208	28.5508	28.56	28.5161	28.3709	27.7775	28.0057	28.0799	28.0748	28.5267	28.3532	28.414	28.0748	0.433413	0.195429	0.27191	19	13	54.9	0	40.218	131	biological regulation;calcium ion transport;cardiac muscle contraction;cation transport;cell cycle process;cellular macromolecule metabolic process;cellular metabolic process;cellular process;cellular protein metabolic process;divalent inorganic cation transport;divalent metal ion transport;establishment of localization;G1/S transition of mitotic cell cycle;ion transport;macromolecule metabolic p…	adenyl nucleotide binding;adenyl ribonucleotide binding;ATP binding;binding;calmodulin-dependent protein kinase activity;catalytic activity;kinase activity;nucleotide binding;phosphotransferase activity, alcohol group as acceptor;protein kinase activity;protein serine/threonine kinase activity;purine nucleotide binding;purine ribonucleoside triphosphate binding;purine ribonucleotide binding;ribon…	axon part;calcium- and calmodulin-dependent protein kinase complex;cell body;cell junction;cell part;cell projection part;cell-cell contact zone;cell-cell junction;cytoplasm;cytoplasmic part;endoplasmic reticulum membrane;endoplasmic reticulum part;initial segment;intercalated disc;intracellular membrane-bounded organelle;intracellular organelle;intracellular organelle part;intracellular part;mac…	Calcium signaling pathway;ErbB signaling pathway;Gastric acid secretion;Glioma;GnRH signaling pathway;ko05152;Long-term potentiation;Melanogenesis;Neurotrophin signaling pathway;Olfactory transduction;Oocyte meiosis;Phototransduction - fly;Wnt signaling pathway					0.092954	1	0.0545002	1.25803	0.302639	0.276562	0.682639	0.35495	0.222061
NaN	NaN	NaN	NaN	NaN	NaN	24.4831	24.822	NaN	NaN	NaN	NaN	NaN	NaN	25.2291	NaN	NaN	NaN	NaN	NaN	NaN	24.6525	25.2291	NaN	0.239631	NaN	NaN	1	1	2.8	0.0080983	0.37293	4	carbohydrate transport;establishment of localization;nucleotide-sugar transport;organic substance transport;transport	active transmembrane transporter activity;carbohydrate transmembrane transporter activity;cation transmembrane transporter activity;cation:sugar symporter activity;ion transmembrane transporter activity;nucleotide-sugar transmembrane transporter activity;secondary active transmembrane transporter activity;solute:cation symporter activity;solute:hydrogen symporter activity;substrate-specific trans…	cell part;cytoplasmic part;Golgi apparatus part;Golgi membrane;integral to membrane;intracellular organelle part;intracellular part;intrinsic to membrane;membrane;membrane part;organelle membrane;organelle part						0	1	NaN	0	1	NaN	0	1	0.576565
NaN	NaN	NaN	NaN	NaN	NaN	NaN	23.626	NaN	NaN	NaN	NaN	NaN	NaN	NaN	NaN	NaN	NaN	NaN	NaN	NaN	23.626	NaN	NaN	NaN	NaN	NaN	1	1	8.3	0	1.3361	2	cellular macromolecule metabolic process;cellular metabolic process;cellular process;cellular protein metabolic process;macromolecule metabolic process;macromolecule modification;metabolic process;primary metabolic process;protein geranylgeranylation;protein metabolic process;protein modification process;protein prenylation	binding;catalytic activity;cation binding;ion binding;metal ion binding;prenyltransferase activity;protein geranylgeranyltransferase activity;protein prenyltransferase activity;Rab geranylgeranyltransferase activity;transferase activity;transferase activity, transferring alkyl or aryl (other than methyl) groups							0	1	NaN	-4.34294e-08	1	0	0	1	NaN
27.0058	27.5815	26.4404	26.2697	26.8598	27.1957	27.7238	27.5759	27.072	27.3132	27.3771	27.0924	27.9064	27.699	27.848	27.8766	27.8722	28.1225	28.0287	NaN	28.332	27.1008	27.5381	28.0756	0.540483	0.351071	0.192184	10	10	59.4	0	24.651	64	anatomical structure development;biological regulation;cellular process;developmental process;establishment of localization;establishment of localization in cell;establishment of protein localization;exocytosis;inner ear development;neurotransmitter secretion;neurotransmitter transport;protein transport;regulation of biological quality;regulation of neurotransmitter levels;secretion;secretion by …		basolateral plasma membrane;cell junction;cell part;cell-cell junction;cytoskeletal part;intracellular organelle part;intracellular part;membrane;membrane part;occluding junction;organelle part;plasma membrane;plasma membrane part;postsynaptic density;postsynaptic membrane;synapse;synapse part;synaptic membrane;tight junction		+			CTX_WT	2.27306	0.0165549	-1.00726	1.84575	0.065219	-0.565758	1.13599	0.123585	0.4415
NaN	NaN	NaN	NaN	NaN	NaN	24.7175	23.6454	NaN	NaN	NaN	NaN	NaN	NaN	24.2636	24.3541	NaN	NaN	NaN	NaN	NaN	24.1814	24.3089	NaN	0.758102	0.0639998	NaN	3	3	13.6	0	1.3419	9	biological regulation;cell surface receptor linked signaling pathway;cellular component organization;cellular component organization or biogenesis;cellular process;cellular response to chemical stimulus;cellular response to cytokine stimulus;cellular response to organic substance;cellular response to stimulus;positive regulation of actin cytoskeleton reorganization;positive regulation of biologic…		actin cytoskeleton;cell part;cell projection;cytoplasmic membrane-bounded vesicle;cytoplasmic part;cytoplasmic vesicle;cytoskeleton;endoplasmic reticulum;intracellular membrane-bounded organelle;intracellular non-membrane-bounded organelle;intracellular organelle;intracellular organelle part;intracellular part;lamellipodium;macromolecular complex;membrane;membrane-bounded organelle;membrane-bound…						0	1	NaN	0	1	NaN	0.0784305	0.93467	0.127455
NaN	NaN	NaN	NaN	NaN	NaN	NaN	23.6707	NaN	NaN	NaN	NaN	NaN	NaN	NaN	NaN	NaN	NaN	NaN	NaN	NaN	23.6707	NaN	NaN	NaN	NaN	NaN	1	1	1.4	0.0041322	0.46186	2	establishment of localization;establishment of protein localization;oligopeptide transport;peptide transport;protein transport;transport	active transmembrane transporter activity;amine transmembrane transporter activity;amino acid transmembrane transporter activity;basic amino acid transmembrane transporter activity;carboxylic acid transmembrane transporter activity;L-amino acid transmembrane transporter activity;L-histidine transmembrane transporter activity;organic acid transmembrane transporter activity;secondary active transme…	cell part;integral to membrane;intrinsic to membrane;membrane part						0	1	NaN	-4.34294e-08	1	0	0	1	NaN
28.8118	28.9424	28.9709	28.1318	29.5913	29.1732	29.4148	29.3412	28.3683	28.5951	28.9966	28.6206	28.791	29.138	29.3772	29.4085	28.1731	28.4979	28.1532	27.5956	28.8577	29.0721	28.8938	28.1731	0.454122	0.381092	0.467483	17	3	45.3	0	16.036	165	antigen processing and presentation;antigen processing and presentation of endogenous antigen;antigen processing and presentation of endogenous peptide antigen;antigen processing and presentation of endogenous peptide antigen via MHC class I;antigen processing and presentation of endogenous peptide antigen via MHC class I via ER pathway;antigen processing and presentation of endogenous peptide an…		cell part;cytoplasmic part;cytoplasmic vesicle membrane;cytoplasmic vesicle part;endocytic vesicle membrane;endoplasmic reticulum part;external side of plasma membrane;integral to endoplasmic reticulum membrane;integral to lumenal side of endoplasmic reticulum membrane;integral to membrane;integral to organelle membrane;intracellular organelle part;intracellular part;intrinsic to endoplasmic reti…	Allograft rejection;Antigen processing and presentation;Autoimmune thyroid disease;Cell adhesion molecules (CAMs);Endocytosis;Graft-versus-host disease;Natural killer cell mediated cytotoxicity;Phagosome;Type I diabetes mellitus;Viral myocarditis	+			CTX_WT	1.93751	0.0410496	0.791653	1.74487	0.0615728	0.656405	0.276391	0.673124	-0.135249
31.9973	32.2195	33.0024	32.9262	32.8533	32.8777	32.742	32.5692	32.6731	32.4984	32.214	32.4215	32.4736	32.2854	31.3099	31.695	31.5412	31.5467	31.5802	32.2192	32.0264	32.7976	32.3534	31.5802	0.362525	0.46159	0.318161	30	13	80.7	0	65.634	626	alcohol catabolic process;alcohol metabolic process;ATP biosynthetic process;ATP metabolic process;biosynthetic process;carbohydrate catabolic process;carbohydrate metabolic process;carboxylic acid biosynthetic process;carboxylic acid metabolic process;catabolic process;cell communication;cell motility;cellular biosynthetic process;cellular carbohydrate catabolic process;cellular carbohydrate met…	catalytic activity;lactate dehydrogenase activity;L-lactate dehydrogenase activity;oxidoreductase activity;oxidoreductase activity, acting on CH-OH group of donors;oxidoreductase activity, acting on the CH-OH group of donors, NAD or NADP as acceptor	cell part;cell projection;cilium;cytoplasm;cytoplasmic part;cytosol;intracellular membrane-bounded organelle;intracellular organelle;intracellular part;membrane-bounded organelle;mitochondrion;motile cilium;organelle	Cysteine and methionine metabolism;Glycolysis / Gluconeogenesis;Propanoate metabolism;Pyruvate metabolism	+			CTX_WT	2.95581	0.00789573	0.865714	0.965021	0.290596	0.413618	1.32847	0.0932301	-0.452096
NaN	NaN	NaN	NaN	22.6856	NaN	NaN	NaN	NaN	NaN	NaN	NaN	NaN	NaN	NaN	NaN	NaN	NaN	NaN	NaN	NaN	22.6856	NaN	NaN	NaN	NaN	NaN	1	1	2.5	0.0013921	0.67844	1			cell part;integral to membrane;intrinsic to membrane;membrane part						0	1	NaN	-4.34294e-08	1	0	0	1	NaN
NaN	NaN	NaN	NaN	NaN	22.83	NaN	NaN	NaN	NaN	NaN	NaN	NaN	NaN	NaN	NaN	NaN	NaN	NaN	NaN	NaN	22.83	NaN	NaN	NaN	NaN	NaN	1	1	5.5	0	1.6981	4			cell part;cytoplasmic part;endosomal part;endosome membrane;integral to membrane;intracellular organelle part;intracellular part;intrinsic to membrane;late endosome membrane;membrane;membrane part;organelle membrane;organelle part						0	1	NaN	-4.34294e-08	1	0	0	1	NaN
NaN	NaN	NaN	NaN	NaN	23.9122	NaN	NaN	NaN	NaN	NaN	NaN	NaN	NaN	NaN	NaN	NaN	NaN	NaN	NaN	NaN	23.9122	NaN	NaN	NaN	NaN	NaN	2	2	3	0	1.7111	3		binding;cation binding;ion binding;metal ion binding;transition metal ion binding;zinc ion binding							0	1	NaN	-4.34294e-08	1	0	0	1	NaN
NaN	NaN	NaN	NaN	NaN	NaN	NaN	NaN	NaN	NaN	NaN	23.4735	NaN	NaN	NaN	NaN	NaN	NaN	NaN	NaN	NaN	NaN	23.4735	NaN	NaN	NaN	NaN	1	1	7.3	0.0024195	0.57397	1									-4.34294e-08	1	0	0	1	NaN	0	1	NaN
22.548	NaN	NaN	NaN	NaN	NaN	NaN	NaN	NaN	NaN	NaN	NaN	NaN	NaN	NaN	NaN	NaN	NaN	NaN	NaN	NaN	22.548	NaN	NaN	NaN	NaN	NaN	1	1	2.3	0.0021293	0.59916	1			cell part;intracellular membrane-bounded organelle;intracellular organelle;intracellular part;membrane-bounded organelle;nucleus;organelle						0	1	NaN	-4.34294e-08	1	0	0	1	NaN
31.273	30.4903	30.7805	31.2164	30.6978	30.7414	32.1258	31.9903	30.17	30.552	31.1449	31.0672	31.2896	30.4396	30.7325	31.6904	30.8691	30.5106	28.8299	31.7161	32.8789	30.9984	30.8998	30.8691	0.611716	0.500993	1.5001	6	6	67.5	0	12.396	142	biological regulation;cellular process;cellular response to abiotic stimulus;cellular response to antibiotic;cellular response to chemical stimulus;cellular response to light stimulus;cellular response to radiation;cellular response to stimulus;cellular response to stress;cellular response to UV;cellular response to UV-B;DNA damage response, signal transduction resulting in induction of apoptosis…	AT DNA binding;binding;cation binding;DNA bending activity;DNA binding;ion binding;metal ion binding;nucleic acid binding;peptide binding;sequence-specific DNA binding;transition metal ion binding;zinc ion binding	cell part;cytoplasm;intracellular part						0.133769	1	0.203513	0.0475176	1	-0.0751554	0.473971	0.419984	-0.278668
28.2619	27.955	27.9741	27.264	27.1193	26.9344	26.8272	NaN	27.656	26.8879	28.0551	28.2938	27.3598	27.3208	NaN	NaN	29.9434	NaN	NaN	NaN	NaN	27.264	27.5079	29.9434	0.574686	0.516585	NaN	15	14	35.6	0	8.7245	31	biological regulation;cell surface receptor linked signaling pathway;cellular process;cellular response to stimulus;regulation of biological process;regulation of cellular process;response to stimulus;signal transduction;Wnt receptor signaling pathway								0	1	-2.4668	0	1	-2.34781	0.152236	0.812158	0.118989
27.8845	27.9945	27.2892	26.2845	26.6048	26.2379	26.4839	NaN	26.5905	27.2746	27.1584	27.6763	26.8334	26.7095	27.0229	NaN	27.8796	27.4423	27.8955	NaN	NaN	26.6048	27.0229	27.8796	0.748718	0.371511	0.257194	16	16	24.7	0	9.6834	43	biological regulation;regulation of biological process;regulation of cell migration;regulation of cell motility;regulation of cellular component movement;regulation of cellular component organization;regulation of cellular process;regulation of cytoskeleton organization;regulation of localization;regulation of locomotion;regulation of organelle organization	structural constituent of muscle;structural molecule activity	adherens junction;anchoring junction;cell junction;cell part;cell-substrate adherens junction;cell-substrate junction;contractile fiber part;cytoplasmic part;cytoskeleton;intracellular non-membrane-bounded organelle;intracellular organelle;intracellular part;non-membrane-bounded organelle;organelle;organelle part;Z disc						0.887355	0.276043	-0.770642	1.72303	0.057188	-0.701185	0.0810927	0.948133	0.0694572
NaN	NaN	22.9768	NaN	NaN	NaN	NaN	NaN	NaN	NaN	NaN	NaN	NaN	NaN	NaN	NaN	NaN	NaN	NaN	NaN	NaN	22.9768	NaN	NaN	NaN	NaN	NaN	2	2	4.9	0	3.3442	3	catabolic process;cellular catabolic process;cellular metabolic process;cellular nitrogen compound catabolic process;cellular nitrogen compound metabolic process;cellular process;cellular response to chemical stimulus;cellular response to cytokine stimulus;cellular response to interferon-gamma;cellular response to organic substance;cellular response to stimulus;GTP catabolic process;GTP metabolic…	binding;catalytic activity;GTP binding;GTPase activity;guanyl nucleotide binding;guanyl ribonucleotide binding;hydrolase activity;hydrolase activity, acting on acid anhydrides;hydrolase activity, acting on acid anhydrides, in phosphorus-containing anhydrides;nucleoside-triphosphatase activity;nucleotide binding;purine nucleotide binding;purine ribonucleoside triphosphate binding;purine ribonucleo…	cell part;cytoplasmic part;cytoplasmic vesicle;intracellular organelle;intracellular part;membrane;organelle;vesicle						0	1	NaN	-4.34294e-08	1	0	0	1	NaN
27.369	27.0691	26.1012	26.0728	25.473	25.7563	NaN	NaN	25.5143	25.709	26.9781	25.5435	NaN	NaN	NaN	NaN	NaN	NaN	NaN	NaN	NaN	26.087	25.6263	NaN	0.748959	0.699873	NaN	4	4	27.7	0	6.304	20				Spliceosome					0	1	NaN	0	1	NaN	0.342222	0.49701	-0.370646
26.702	26.4886	27.4354	28.2604	27.6275	27.3265	28.127	28.2619	27.3712	27.2013	27.0688	NaN	26.6695	27.0045	27.1414	26.8579	NaN	NaN	NaN	NaN	NaN	27.5314	27.0688	NaN	0.681949	0.230332	NaN	17	17	23.3	0	32.562	91	biological regulation;cell cycle checkpoint;cellular macromolecule metabolic process;cellular metabolic process;cellular nitrogen compound metabolic process;cellular process;cellular response to stimulus;cellular response to stress;DNA metabolic process;DNA repair;macromolecule metabolic process;metabolic process;ncRNA metabolic process;ncRNA processing;nitrogen compound metabolic process;nucleic…		cell part;integrator complex;intracellular organelle part;intracellular part;macromolecular complex;nuclear part;nucleoplasm part;organelle part;protein complex;SOSS complex						0	1	NaN	0	1	NaN	1.00866	0.136836	-0.483688
NaN	NaN	NaN	NaN	NaN	NaN	23.87	23.2516	NaN	NaN	NaN	NaN	NaN	NaN	NaN	NaN	NaN	NaN	NaN	NaN	NaN	23.5608	NaN	NaN	0.437339	NaN	NaN	3	2	4.5	0.0055759	0.43405	3	biological regulation;negative regulation of axonogenesis;negative regulation of biological process;negative regulation of cell development;negative regulation of cell differentiation;negative regulation of cell projection organization;negative regulation of cellular component organization;negative regulation of cellular process;negative regulation of developmental process;negative regulation of …		cell part;cell projection;cell projection part;filopodium;growth cone;site of polarized growth						0	1	NaN	-4.34294e-08	1	0	0	1	NaN
NaN	NaN	NaN	NaN	NaN	NaN	NaN	NaN	NaN	NaN	NaN	NaN	24.9701	NaN	NaN	NaN	NaN	NaN	NaN	NaN	NaN	NaN	24.9701	NaN	NaN	NaN	NaN	1	1	2.5	0	2.5862	6	biological regulation;catabolic process;cellular catabolic process;cellular macromolecule catabolic process;cellular macromolecule metabolic process;cellular metabolic process;cellular nitrogen compound metabolic process;cellular process;exonucleolytic nuclear-transcribed mRNA catabolic process involved in deadenylation-dependent decay;macromolecule catabolic process;macromolecule metabolic proce…	AU-rich element binding;binding;catalytic activity;exonuclease activity;hydrolase activity;hydrolase activity, acting on ester bonds;nuclease activity;nucleic acid binding;RNA binding	cell part;cytoplasm;exosome (RNase complex);intracellular non-membrane-bounded organelle;intracellular organelle;intracellular organelle part;intracellular part;macromolecular complex;non-membrane-bounded organelle;nuclear part;nucleolus;organelle;organelle part;protein complex	RNA degradation					-4.34294e-08	1	0	0	1	NaN	0	1	NaN
24.4545	26.2894	NaN	NaN	NaN	NaN	NaN	23.6437	25.4647	25.0373	25.8046	26.1889	26.8076	26.5091	27.1929	26.9122	NaN	27.1723	27.5032	26.4343	26.2309	24.4545	26.349	26.8033	1.35546	0.755377	0.601579	5	5	21.1	0	5.2989	34	adiponectin-mediated signaling pathway;alcohol metabolic process;anatomical structure development;biological regulation;brown fat cell differentiation;carbohydrate homeostasis;carbohydrate metabolic process;carboxylic acid catabolic process;carboxylic acid metabolic process;catabolic process;cell differentiation;cell surface receptor linked signaling pathway;cellular carbohydrate metabolic proces…	binding;carbohydrate binding;hormone activity;monosaccharide binding;protein binding;receptor binding;sialic acid binding;sugar binding	cell part;cell periphery;cell surface;collagen;cytoplasmic part;endoplasmic reticulum;extracellular matrix part;extracellular region part;extracellular space;intracellular membrane-bounded organelle;intracellular organelle;intracellular part;membrane-bounded organelle;organelle;perinuclear region of cytoplasm	Adipocytokine signaling pathway;PPAR signaling pathway;Type II diabetes mellitus			+	MDX_CTX	1.38761	0.0521197	-2.0393	0.693892	0.368314	-0.595508	1.33524	0.0340246	1.44379
28.495	30.6998	30.078	29.5693	30.6693	29.857	30.3565	28.6789	29.9394	29.9697	30.2481	29.5007	27.8378	28.1222	27.4422	30.061	28.002	29.1781	NaN	28.0514	28.8721	29.9675	29.7201	28.4618	0.842493	1.14316	0.590133	13	2	77.6	0	2.5319	55	anatomical structure development;biological regulation;biosynthetic process;body fluid secretion;carbohydrate homeostasis;cellular biosynthetic process;cellular chemical homeostasis;cellular component organization;cellular component organization or biogenesis;cellular glucose homeostasis;cellular homeostasis;cellular membrane organization;cellular metabolic process;cellular nitrogen compound bios…	adenyl nucleotide binding;adenyl ribonucleotide binding;ATP binding;binding;catalytic activity;cation binding;deoxyribonuclease activity;DNA binding;GTP binding;guanyl nucleotide binding;guanyl ribonucleotide binding;hydrolase activity;hydrolase activity, acting on ester bonds;ion binding;kinase activity;magnesium ion binding;metal ion binding;nuclease activity;nucleic acid binding;nucleobase-con…	cell part;centrosome;cytoplasmic part;cytoskeletal part;cytosol;intracellular membrane-bounded organelle;intracellular non-membrane-bounded organelle;intracellular organelle;intracellular organelle part;intracellular part;membrane;membrane-bounded organelle;microtubule organizing center;mitochondrion;non-membrane-bounded organelle;nucleus;organelle;organelle part;perinuclear region of cytoplasm	Purine metabolism;Pyrimidine metabolism	+			CTX_WT	1.63953	0.0408483	1.27456	0.463586	0.572519	0.614235	0.67866	0.211378	-0.660328
26.6828	26.8551	25.7753	25.6328	NaN	25.819	26.0404	26.4484	NaN	NaN	NaN	NaN	NaN	NaN	NaN	NaN	NaN	NaN	NaN	NaN	NaN	26.0404	NaN	NaN	0.481957	NaN	NaN	5	4	7.5	0	3.5853	13	response to abiotic stimulus;response to osmotic stress;response to stimulus;response to stress	nucleic acid binding transcription factor activity;sequence-specific DNA binding transcription factor activity							0	1	NaN	-4.34294e-08	1	0	0	1	NaN
NaN	NaN	NaN	NaN	NaN	NaN	NaN	NaN	NaN	NaN	NaN	NaN	NaN	NaN	NaN	NaN	NaN	NaN	NaN	NaN	NaN	NaN	NaN	NaN	NaN	NaN	NaN	1	1	8.1	0.00016941	1.1542	1		binding;GTP binding;guanyl nucleotide binding;guanyl ribonucleotide binding;nucleotide binding;purine nucleotide binding;purine ribonucleoside triphosphate binding;purine ribonucleotide binding;ribonucleotide binding							-4.34294e-08	1	0	-4.34294e-08	1	0	-4.34294e-08	1	0
NaN	NaN	NaN	NaN	NaN	NaN	24.3809	24.5416	NaN	NaN	NaN	NaN	NaN	NaN	NaN	NaN	NaN	NaN	NaN	NaN	NaN	24.4612	NaN	NaN	0.113624	NaN	NaN	3	2	9	0	1.3033	5	anatomical structure morphogenesis;biological regulation;cAMP-mediated signaling;cell differentiation;cell surface receptor linked signaling pathway;cellular developmental process;cellular process;cellular response to stimulus;chordate embryonic development;cyclic-nucleotide-mediated signaling;developmental process;embryo development;embryo development ending in birth or egg hatching;embryonic di…	binding;catalytic activity;cation binding;D5 dopamine receptor binding;dopamine receptor binding;G-protein beta/gamma-subunit complex binding;G-protein-coupled receptor binding;GTP binding;GTPase activity;guanyl nucleotide binding;guanyl ribonucleotide binding;hydrolase activity;hydrolase activity, acting on acid anhydrides;hydrolase activity, acting on acid anhydrides, in phosphorus-containing a…	brush border membrane;cell part;cell projection membrane;cell projection part;extrinsic to internal side of plasma membrane;extrinsic to membrane;extrinsic to plasma membrane;heterotrimeric G-protein complex;intracellular part;macromolecular complex;membrane part;plasma membrane part;protein complex	Long-term depression;MAPK signaling pathway;Regulation of actin cytoskeleton;Vascular smooth muscle contraction					0	1	NaN	-4.34294e-08	1	0	0	1	NaN
24.7052	NaN	24.6778	NaN	24.7438	24.7919	24.3716	25.7137	NaN	24.3634	NaN	NaN	NaN	NaN	24.6493	NaN	NaN	NaN	NaN	NaN	NaN	24.7245	24.5063	NaN	0.455747	0.202147	NaN	5	2	11.4	0	1.7137	11	anatomical structure development;anatomical structure formation involved in morphogenesis;biological regulation;biosynthetic process;cardiac chamber formation;cardiac right ventricle formation;cardiac ventricle formation;cell differentiation;cellular biosynthetic process;cellular component disassembly;cellular component disassembly at cellular level;cellular component organization;cellular compon…	ligand-dependent nuclear receptor transcription coactivator activity;protein binding transcription factor activity;transcription coactivator activity;transcription cofactor activity;transcription factor binding transcription factor activity	cell part;chromatin;chromatin remodeling complex;chromosomal part;cytoplasm;intracellular organelle part;intracellular part;macromolecular complex;nBAF complex;npBAF complex;nuclear chromatin;nuclear chromosome part;nuclear part;organelle part;protein complex;SWI/SNF-type complex						0	1	NaN	0	1	NaN	0.419521	0.439838	-0.327657
NaN	NaN	NaN	NaN	NaN	NaN	24.7578	24.4938	NaN	NaN	NaN	NaN	NaN	NaN	NaN	26.4734	NaN	NaN	NaN	28.5101	27.7499	24.6258	26.4734	28.13	0.186676	NaN	0.537535	1	1	23.1	0	6.9648	27	anatomical structure formation involved in morphogenesis;biological regulation;cell cycle arrest;cell cycle process;cellular component assembly;cellular component assembly at cellular level;cellular component assembly involved in morphogenesis;cellular component organization;cellular component organization at cellular level;cellular component organization or biogenesis;cellular component organiza…		cell junction;cell part;cell-cell junction;compact myelin;integral to membrane;intrinsic to membrane;membrane;membrane part;occluding junction;plasma membrane;tight junction		+			CTX_WT	1.88843	0.0122232	-3.50418	0	1	-1.65662	0	0.887998	1.84757
26.4174	26.1636	29.0465	29.3638	29.527	29.1094	29.5837	29.4566	27.351	25.7999	26.2357	25.6459	27.1502	26.8334	25.89	25.7235	NaN	NaN	25.4911	28.43	28.2083	29.2366	26.0628	28.2083	1.4293	0.685356	1.63653	45	45	28.7	0	53.013	169	acetyl-CoA metabolic process;anatomical structure homeostasis;biological regulation;biosynthetic process;carboxylic acid biosynthetic process;carboxylic acid metabolic process;cellular biosynthetic process;cellular component assembly;cellular component organization;cellular component organization or biogenesis;cellular ketone metabolic process;cellular lipid metabolic process;cellular metabolic p…	acetyl-CoA carboxylase activity;adenyl nucleotide binding;adenyl ribonucleotide binding;ATP binding;binding;biotin carboxylase activity;catalytic activity;cation binding;CoA carboxylase activity;ion binding;ligase activity;ligase activity, forming carbon-carbon bonds;ligase activity, forming carbon-nitrogen bonds;metal ion binding;nucleotide binding;purine nucleotide binding;purine ribonucleoside…	cell part;cytoplasmic part;cytosol;intracellular membrane-bounded organelle;intracellular organelle;intracellular part;membrane-bounded organelle;mitochondrion;organelle	Fatty acid biosynthesis;Insulin signaling pathway;Propanoate metabolism;Pyruvate metabolism			+	MDX_CTX	0.587679	0.463604	1.20703	0.827555	0.226676	-1.0478	2.90066	0.00110486	-2.25482
NaN	NaN	NaN	NaN	NaN	NaN	24.8081	24.6913	NaN	NaN	NaN	NaN	NaN	NaN	NaN	NaN	NaN	NaN	NaN	NaN	NaN	24.7497	NaN	NaN	0.0826402	NaN	NaN	2	2	29.1	0	1.5415	3	biological regulation;biosynthetic process;cellular biosynthetic process;cellular macromolecule biosynthetic process;cellular macromolecule metabolic process;cellular metabolic process;cellular nitrogen compound metabolic process;cellular process;macromolecule biosynthetic process;macromolecule metabolic process;metabolic process;nitrogen compound metabolic process;nucleic acid metabolic process;…		cell part;Elongator holoenzyme complex;intracellular part;macromolecular complex;protein complex						0	1	NaN	-4.34294e-08	1	0	0	1	NaN
NaN	NaN	NaN	NaN	NaN	NaN	NaN	21.8495	NaN	NaN	NaN	NaN	NaN	NaN	NaN	NaN	NaN	NaN	NaN	NaN	NaN	21.8495	NaN	NaN	NaN	NaN	NaN	1	1	2.9	0.00063401	0.77488	2	apoptosis;cell death;cellular process;death;programmed cell death	acid-amino acid ligase activity;binding;catalytic activity;cation binding;ion binding;ligase activity;ligase activity, forming carbon-nitrogen bonds;metal ion binding;small conjugating protein ligase activity;transition metal ion binding;ubiquitin-protein ligase activity;zinc ion binding	cell part;endomembrane system;intracellular organelle part;intracellular part;membrane;nuclear body;nuclear part;nuclear speck;nucleoplasm part;organelle part						0	1	NaN	-4.34294e-08	1	0	0	1	NaN
NaN	NaN	NaN	NaN	NaN	NaN	NaN	NaN	NaN	NaN	NaN	NaN	NaN	NaN	NaN	22.7195	NaN	NaN	NaN	NaN	NaN	NaN	22.7195	NaN	NaN	NaN	NaN	1	1	2.3	0.0082133	0.35924	1	ATP metabolic process;biological regulation;biosynthetic process;cellular biosynthetic process;cellular metabolic process;cellular nitrogen compound biosynthetic process;cellular nitrogen compound metabolic process;cellular process;cellular response to stimulus;heterocycle metabolic process;metabolic process;nitrogen compound metabolic process;nucleobase-containing compound biosynthetic process;n…	adenyl nucleotide binding;adenyl ribonucleotide binding;adenylate kinase activity;ATP binding;binding;cAMP-dependent protein kinase regulator activity;catalytic activity;enzyme regulator activity;kinase activity;kinase regulator activity;nucleobase-containing compound kinase activity;nucleoside kinase activity;nucleotide binding;nucleotide kinase activity;phosphotransferase activity, phosphate gr…	cell part;centrosome;cytoplasm;cytoplasmic part;cytoskeletal part;intracellular non-membrane-bounded organelle;intracellular organelle;intracellular organelle part;intracellular part;microtubule organizing center;non-membrane-bounded organelle;organelle;organelle part	Purine metabolism					-4.34294e-08	1	0	0	1	NaN	0	1	NaN
NaN	NaN	NaN	NaN	NaN	NaN	NaN	NaN	NaN	NaN	NaN	NaN	NaN	NaN	NaN	NaN	NaN	NaN	NaN	NaN	NaN	NaN	NaN	NaN	NaN	NaN	NaN	2	2	3.5	0	1.1913	2	biological regulation;defense response;inflammatory response;positive regulation of biological process;positive regulation of biosynthetic process;positive regulation of cell communication;positive regulation of cellular biosynthetic process;positive regulation of cellular metabolic process;positive regulation of cellular process;positive regulation of cytokine production;positive regulation of e…	binding;enzyme activator activity;enzyme regulator activity;kinase activator activity;kinase regulator activity;lipid binding;phospholipid binding;protein kinase activator activity;protein kinase regulator activity;protein tyrosine kinase activator activity	aggresome;cell part;cytoplasm;inclusion body;intracellular membrane-bounded organelle;intracellular organelle;intracellular part;membrane;membrane-bounded organelle;nucleus;organelle;plasma membrane						-4.34294e-08	1	0	-4.34294e-08	1	0	-4.34294e-08	1	0
26.8917	26.0729	26.4278	26.2512	26.2705	27.2833	27.4919	26.8452	25.6248	25.8835	NaN	NaN	25.7995	25.1763	26.734	27.3745	NaN	NaN	NaN	NaN	NaN	26.6365	25.8415	NaN	0.517946	0.805291	NaN	11	11	21.5	0	15.241	42	biological regulation;catabolic process;cellular catabolic process;cellular macromolecule catabolic process;cellular macromolecule metabolic process;cellular metabolic process;cellular process;cellular protein metabolic process;macromolecule catabolic process;macromolecule metabolic process;macromolecule modification;metabolic process;modification-dependent macromolecule catabolic process;modific…		cell part;intracellular membrane-bounded organelle;intracellular organelle;intracellular part;membrane-bounded organelle;nucleus;organelle						0	1	NaN	0	1	NaN	0.925995	0.136301	-0.593031
30.0738	29.7876	29.1159	29.2169	28.9905	28.4136	27.6757	27.8522	29.8117	30.0942	29.1272	29.3523	28.3061	29.179	30.3003	30.5936	29.337	28.974	30.2317	31.655	31.5741	29.0532	29.582	30.2317	0.858059	0.746693	1.23844	10	9	63.1	0	28.652	197	multicellular organismal process;muscle contraction;muscle system process;skeletal muscle contraction;striated muscle contraction;system process	binding;calcium ion binding;cation binding;ion binding;metal ion binding	cell part;contractile fiber part;cytoplasmic part;cytoskeletal part;intracellular organelle part;intracellular part;macromolecular complex;organelle part;protein complex;troponin complex	Calcium signaling pathway	+			CTX_WT	1.55651	0.0437752	-1.46357	0.718902	0.320031	-0.758795	0.993321	0.109206	0.704772
33.3452	33.222	31.7311	31.6618	31.6924	31.8649	31.3226	31.6969	31.9441	31.8942	32.8501	33.0279	31.7722	31.6413	31.1467	30.9113	31.6539	31.8301	30.7894	29.8927	29.8878	31.714	31.8332	30.7894	0.76692	0.737273	0.928029	39	0	84.7	0	45.4	304	anatomical structure development;brain development;developmental process;organ development		actin filament bundle;actomyosin;cell cortex part;cell part;cell projection part;cortical cytoskeleton;cytoplasmic part;cytoskeletal part;cytoskeleton;growth cone;intracellular non-membrane-bounded organelle;intracellular organelle;intracellular organelle part;intracellular part;macromolecular complex;non-membrane-bounded organelle;organelle;organelle part;podosome;protein complex;site of polariz…	Cardiac muscle contraction;Dilated cardiomyopathy;Hypertrophic cardiomyopathy (HCM);Pathways in cancer;Thyroid cancer	+			CTX_WT	1.65225	0.0405115	1.25632	1.41477	0.064214	1.08768	0.179959	0.751657	-0.168637
NaN	NaN	NaN	NaN	25.5938	NaN	NaN	NaN	NaN	NaN	NaN	NaN	NaN	NaN	NaN	NaN	NaN	NaN	NaN	NaN	NaN	25.5938	NaN	NaN	NaN	NaN	NaN	3	3	23.4	0	2.4467	6			cell part;cytoplasm;intracellular part;membrane;plasma membrane						0	1	NaN	-4.34294e-08	1	0	0	1	NaN
33.27	33.3124	33.5677	33.6871	33.4492	33.4428	33.0448	33.0647	33.3631	33.2895	33.1618	33.1957	33.3452	33.244	32.6331	32.5058	33.1269	32.9711	32.7651	31.5671	31.5161	33.3776	33.2199	32.7651	0.227316	0.331567	0.784591	151	132	69.8	0	323.31	2077	actin cytoskeleton organization;actin filament-based process;biological adhesion;biological regulation;cell adhesion;cell junction assembly;cell junction organization;cell-substrate junction assembly;cellular component assembly;cellular component assembly at cellular level;cellular component organization;cellular component organization at cellular level;cellular component organization or biogenes…	structural constituent of cytoskeleton;structural molecule activity	actin cytoskeleton;adherens junction;anchoring junction;cell junction;cell part;cell projection;cell projection membrane;cell projection part;cell surface;cell-substrate adherens junction;cell-substrate junction;centrosome;cytoplasm;cytoplasmic part;cytoskeletal part;cytoskeleton;extracellular membrane-bounded organelle;extracellular organelle;extracellular region part;extracellular vesicular exo…	Focal adhesion	+			CTX_WT	2.183	0.0205055	0.965568	1.35736	0.104122	0.70301	1.06579	0.216228	-0.262558
NaN	NaN	NaN	NaN	NaN	NaN	NaN	22.3898	NaN	NaN	NaN	NaN	NaN	NaN	NaN	NaN	NaN	NaN	NaN	NaN	NaN	22.3898	NaN	NaN	NaN	NaN	NaN	78	2	84.2	0	1.319	5	actin crosslink formation;actin cytoskeleton organization;actin filament bundle assembly;actin filament organization;actin filament-based process;cellular component assembly;cellular component assembly at cellular level;cellular component organization;cellular component organization at cellular level;cellular component organization or biogenesis;cellular component organization or biogenesis at ce…	actin binding;actin filament binding;binding;calcium ion binding;cation binding;cytoskeletal protein binding;ion binding;metal ion binding;protein binding	adherens junction;anchoring junction;cell junction;cell part;cell-cell adherens junction;cell-cell junction;contractile fiber part;cytoplasmic part;fascia adherens;intracellular part;organelle part;Z disc						0	1	NaN	-4.34294e-08	1	0	0	1	NaN
NaN	NaN	NaN	NaN	24.4272	NaN	NaN	NaN	NaN	NaN	NaN	NaN	NaN	NaN	NaN	NaN	NaN	NaN	NaN	NaN	NaN	24.4272	NaN	NaN	NaN	NaN	NaN	1	1	1.8	0.0041298	0.45922	4			cell part;integral to membrane;intrinsic to membrane;membrane part						0	1	NaN	-4.34294e-08	1	0	0	1	NaN
24.6936	NaN	NaN	NaN	25.6988	25.248	24.7129	25.3771	NaN	NaN	NaN	NaN	24.7449	NaN	NaN	NaN	NaN	NaN	NaN	NaN	NaN	25.248	24.7449	NaN	0.436351	NaN	NaN	6	6	9.8	0	4.2461	12	anatomical structure formation involved in morphogenesis;biological regulation;cellular macromolecule metabolic process;cellular metabolic process;cellular process;cellular protein metabolic process;circadian rhythm;developmental process;macromolecule metabolic process;macromolecule modification;metabolic process;myoblast fusion;negative regulation of biological process;negative regulation of cel…	adenyl nucleotide binding;adenyl ribonucleotide binding;ATP binding;binding;catalytic activity;kinase activity;non-membrane spanning protein tyrosine kinase activity;nucleotide binding;phosphotransferase activity, alcohol group as acceptor;protein binding transcription factor activity;protein kinase activity;protein serine/threonine kinase activity;protein serine/threonine/tyrosine kinase activit…	cell part;intracellular membrane-bounded organelle;intracellular organelle;intracellular organelle part;intracellular part;macromolecular complex;membrane-bounded organelle;nuclear body;nuclear part;nuclear speck;nucleoplasm part;nucleus;organelle;organelle part;ribonucleoprotein complex						0	1	NaN	0	1	NaN	0	1	-0.40114
NaN	NaN	NaN	NaN	NaN	NaN	25.5816	NaN	NaN	NaN	NaN	NaN	NaN	NaN	25.7389	NaN	NaN	NaN	NaN	NaN	NaN	25.5816	25.7389	NaN	NaN	NaN	NaN	3	3	5.4	0	4.1465	10	biological regulation;cation homeostasis;chemical homeostasis;homeostatic process;ion homeostasis;monovalent inorganic cation homeostasis;regulation of biological quality;regulation of pH	active transmembrane transporter activity;antiporter activity;cation transmembrane transporter activity;cation:cation antiporter activity;hydrogen ion transmembrane transporter activity;inorganic cation transmembrane transporter activity;ion transmembrane transporter activity;metal ion transmembrane transporter activity;monovalent cation:hydrogen antiporter activity;monovalent inorganic cation tr…	cell part;cytoplasmic part;early endosome membrane;endoplasmic reticulum membrane;endoplasmic reticulum part;endosomal part;endosome membrane;integral to membrane;intracellular membrane-bounded organelle;intracellular organelle;intracellular organelle part;intracellular part;intrinsic to membrane;membrane;membrane part;membrane-bounded organelle;mitochondrion;organelle;organelle membrane;organell…						0	1	NaN	0	1	NaN	0	1	0.157301
29.7088	28.906	27.9955	28.1604	27.6333	27.8592	27.6873	27.8108	27.602	27.5616	27.253	28.0771	27.1344	27.6444	28.1825	27.2852	NaN	NaN	NaN	26.3139	27.2902	27.9273	27.5818	26.802	0.723743	0.379136	0.690321	11	11	28.1	0	24.189	80	biosynthetic process;cellular biosynthetic process;cellular macromolecule biosynthetic process;cellular macromolecule metabolic process;cellular metabolic process;cellular nitrogen compound metabolic process;cellular process;macromolecule biosynthetic process;macromolecule metabolic process;metabolic process;nitrogen compound metabolic process;nucleic acid metabolic process;nucleobase-containing …	binding;cation binding;DNA binding;ion binding;metal ion binding;nucleic acid binding;nucleic acid binding transcription factor activity;sequence-specific DNA binding;sequence-specific DNA binding transcription factor activity;transition metal ion binding;zinc ion binding	cell part;intracellular membrane-bounded organelle;intracellular organelle;intracellular organelle part;intracellular part;membrane-bounded organelle;nuclear body;nuclear part;nuclear speck;nucleoplasm part;nucleus;organelle;organelle part						1.42746	0.059589	1.41811	1.31224	0.0999787	0.790482	1.32367	0.0676216	-0.62763
NaN	NaN	NaN	NaN	NaN	NaN	NaN	NaN	NaN	NaN	NaN	NaN	NaN	NaN	NaN	NaN	NaN	NaN	NaN	NaN	NaN	NaN	NaN	NaN	NaN	NaN	NaN	1	1	2.1	0.006688	0.40098	7	anatomical structure development;anatomical structure morphogenesis;anterior/posterior pattern specification;astrocyte differentiation;axis specification;axon guidance;biological regulation;blood vessel development;carbohydrate homeostasis;cell development;cell differentiation;cell fate commitment;cell fate determination;cell fate specification;cell migration;cell motility;cell surface receptor l…	AT DNA binding;binding;core promoter binding;core promoter sequence-specific DNA binding;co-SMAD binding;DNA binding;double-stranded DNA binding;enzyme binding;histone acetyltransferase binding;nucleic acid binding;nucleic acid binding transcription factor activity;protein binding;regulatory region DNA binding;regulatory region nucleic acid binding;RNA polymerase II core promoter sequence-specifi…	cell part;chromatin;chromosomal part;cytoplasm;intracellular organelle part;intracellular part;macromolecular complex;nuclear chromatin;nuclear chromosome part;nuclear part;nucleoplasm part;organelle part;protein complex;transcription factor complex	Maturity onset diabetes of the young					-4.34294e-08	1	0	-4.34294e-08	1	0	-4.34294e-08	1	0
32.8683	32.7711	33.0356	32.8087	33.1351	32.933	32.4639	32.5079	32.4869	32.6704	32.5466	32.3535	32.6756	32.7658	31.7066	31.63	32.4104	32.3727	31.5483	30.1743	30.0696	32.8385	32.5168	31.5483	0.235261	0.442592	1.14297	57	42	65.3	0	137.35	883	biological adhesion;biological regulation;cell adhesion;cell migration;cell motility;cell-cell adhesion;cellular component movement;cellular process;immune system process;leukocyte cell-cell adhesion;leukocyte migration;locomotion;membrane docking;membrane to membrane docking;regulation of biological process;regulation of cell migration;regulation of cell motility;regulation of cellular component…		adherens junction;anchoring junction;apical plasma membrane;basolateral plasma membrane;cell junction;cell part;cell projection;cell projection membrane;cell projection part;cell-substrate adherens junction;cell-substrate junction;cytoplasm;cytoskeleton;extracellular membrane-bounded organelle;extracellular organelle;extracellular region part;extracellular vesicular exosome;extrinsic to membrane;…	Leukocyte transendothelial migration;Measles;Regulation of actin cytoskeleton	+			CTX_WT	2.44392	0.00688193	1.5004	1.41799	0.0657917	1.03938	1.67951	0.0595725	-0.461019
NaN	24.0637	NaN	NaN	NaN	NaN	NaN	NaN	NaN	NaN	NaN	NaN	NaN	NaN	NaN	NaN	NaN	NaN	NaN	NaN	NaN	24.0637	NaN	NaN	NaN	NaN	NaN	3	3	3.2	0	2.0942	7	anatomical structure development;anatomical structure morphogenesis;biological regulation;biosynthetic process;branching involved in mammary gland duct morphogenesis;branching morphogenesis of a tube;cellular biosynthetic process;cellular component organization;cellular component organization at cellular level;cellular component organization or biogenesis;cellular component organization or biogen…	acetyltransferase activity;binding;catalytic activity;chromatin binding;histone acetyltransferase activity;lysine N-acetyltransferase activity;molecular transducer activity;N-acetyltransferase activity;N-acyltransferase activity;protein binding transcription factor activity;signal transducer activity;transcription coactivator activity;transcription cofactor activity;transcription factor binding t…	cell part;cytoplasm;intracellular membrane-bounded organelle;intracellular organelle;intracellular organelle part;intracellular part;membrane-bounded organelle;nuclear part;nucleoplasm;nucleus;organelle;organelle part						0	1	NaN	-4.34294e-08	1	0	0	1	NaN
26.187	25.8077	25.8309	26.0577	26.1133	26.0588	25.8149	26.138	26.2028	NaN	NaN	NaN	24.3487	NaN	NaN	NaN	NaN	NaN	NaN	NaN	NaN	26.0583	25.2757	NaN	0.157418	1.31104	NaN	14	14	16.8	0	3.8916	20		binding;cation binding;ion binding;metal ion binding;transition metal ion binding;zinc ion binding							0	1	NaN	0	1	NaN	1.01793	0.101391	-0.725311
NaN	25.957	NaN	NaN	NaN	NaN	NaN	NaN	NaN	NaN	25.7294	NaN	24.7173	NaN	NaN	NaN	NaN	NaN	NaN	NaN	NaN	25.957	25.2234	NaN	NaN	0.71567	NaN	4	4	31.1	0.00241	0.55225	10		binding;cation binding;ion binding;metal ion binding							0	1	NaN	0	1	NaN	0	1	-0.733584
30.7034	30.7014	29.5477	29.316	29.5925	29.7238	29.525	29.5398	29.4844	29.7373	30.6114	30.2999	28.8166	29.2733	29.3211	29.8611	29.4253	29.2435	28.4398	27.2027	NaN	29.5701	29.6109	28.8416	0.549141	0.581322	1.01182	39	24	47.5	0	59.602	182	actin filament capping;apical protein localization;asymmetric protein localization;biological regulation;cell projection assembly;cell projection organization;cellular component assembly;cellular component assembly at cellular level;cellular component organization;cellular component organization at cellular level;cellular component organization or biogenesis;cellular component organization or bio…		adherens junction;anchoring junction;apical part of cell;cell division site part;cell junction;cell part;cell projection;cell-substrate adherens junction;cell-substrate junction;cleavage furrow;cytoplasm;cytoskeleton;extrinsic to membrane;filopodium;focal adhesion;intracellular non-membrane-bounded organelle;intracellular organelle;intracellular part;lamellipodium;membrane;membrane part;microvill…	Regulation of actin cytoskeleton	+			CTX_WT	1.75819	0.0325893	1.2534	1.45136	0.0590165	1.09783	0.22855	0.702889	-0.155575
NaN	NaN	NaN	24.1847	24.8428	NaN	25.5645	25.8797	NaN	NaN	NaN	NaN	NaN	NaN	NaN	NaN	NaN	NaN	NaN	NaN	NaN	25.2036	NaN	NaN	0.758577	NaN	NaN	4	4	9	0	10.273	13	carboxylic acid metabolic process;cellular ketone metabolic process;cellular lipid metabolic process;cellular metabolic process;cellular process;fatty acid metabolic process;lipid metabolic process;metabolic process;monocarboxylic acid metabolic process;organic acid metabolic process;oxoacid metabolic process;primary metabolic process;small molecule metabolic process	catalytic activity;hydrolase activity;hydrolase activity, acting on ester bonds;phosphatase activity;phosphatidate phosphatase activity;phosphoric ester hydrolase activity	cell part;intracellular membrane-bounded organelle;intracellular organelle;intracellular part;membrane-bounded organelle;nucleus;organelle						0	1	NaN	-4.34294e-08	1	0	0	1	NaN
NaN	NaN	NaN	NaN	NaN	NaN	NaN	24.2188	NaN	NaN	NaN	NaN	NaN	NaN	NaN	NaN	NaN	NaN	NaN	NaN	NaN	24.2188	NaN	NaN	NaN	NaN	NaN	3	3	3.8	0	1.5681	4	cellular macromolecule metabolic process;cellular metabolic process;cellular nitrogen compound metabolic process;cellular process;macromolecule metabolic process;metabolic process;mRNA metabolic process;mRNA processing;nitrogen compound metabolic process;nucleic acid metabolic process;nucleobase-containing compound metabolic process;primary metabolic process;RNA metabolic process;RNA processing;R…	adenyl nucleotide binding;adenyl ribonucleotide binding;ATP binding;ATPase activity;ATPase activity, coupled;ATP-dependent helicase activity;binding;catalytic activity;helicase activity;hydrolase activity;hydrolase activity, acting on acid anhydrides;hydrolase activity, acting on acid anhydrides, in phosphorus-containing anhydrides;nucleic acid binding;nucleoside-triphosphatase activity;nucleotid…	catalytic step 2 spliceosome;cell part;intracellular organelle part;intracellular part;macromolecular complex;nuclear part;organelle part;ribonucleoprotein complex;spliceosomal complex	Spliceosome					0	1	NaN	-4.34294e-08	1	0	0	1	NaN
NaN	25.6814	26.131	NaN	25.8407	25.256	26.9801	26.089	NaN	NaN	NaN	NaN	NaN	NaN	25.7195	25.1019	NaN	26.4678	NaN	NaN	NaN	25.9649	25.4107	26.4678	0.577248	0.436722	NaN	6	6	21.6	0	6.6114	18	alanyl-tRNA aminoacylation;amine metabolic process;amino acid activation;carboxylic acid metabolic process;cellular amine metabolic process;cellular amino acid metabolic process;cellular ketone metabolic process;cellular macromolecule metabolic process;cellular metabolic process;cellular nitrogen compound metabolic process;cellular process;macromolecule metabolic process;metabolic process;ncRNA m…	adenyl nucleotide binding;adenyl ribonucleotide binding;alanine-tRNA ligase activity;aminoacyl-tRNA ligase activity;ATP binding;binding;catalytic activity;cation binding;ion binding;ligase activity;ligase activity, forming aminoacyl-tRNA and related compounds;ligase activity, forming carbon-oxygen bonds;metal ion binding;nucleic acid binding;nucleotide binding;purine nucleotide binding;purine rib…	cell part;cytoplasm;intracellular part						0	1	-0.471374	0	1	-1.05701	0.611275	0.250398	-0.585637
NaN	NaN	NaN	NaN	NaN	NaN	26.195	25.9081	NaN	NaN	NaN	NaN	NaN	NaN	NaN	NaN	NaN	NaN	NaN	NaN	NaN	26.0516	NaN	NaN	0.20289	NaN	NaN	2	2	21.8	0	5.3978	7	anaphase-promoting complex-dependent proteasomal ubiquitin-dependent protein catabolic process;biological regulation;catabolic process;cell cycle process;cell division;cellular catabolic process;cellular component assembly;cellular component assembly at cellular level;cellular component organization;cellular component organization at cellular level;cellular component organization or biogenesis;ce…	acid-amino acid ligase activity;adenyl nucleotide binding;adenyl ribonucleotide binding;ATP binding;binding;catalytic activity;ligase activity;ligase activity, forming carbon-nitrogen bonds;nucleotide binding;purine nucleotide binding;purine ribonucleoside triphosphate binding;purine ribonucleotide binding;ribonucleotide binding;small conjugating protein ligase activity;ubiquitin-protein ligase a…	anaphase-promoting complex;cell part;cullin-RING ubiquitin ligase complex;intracellular organelle part;intracellular part;macromolecular complex;nuclear part;nuclear ubiquitin ligase complex;organelle part;protein complex;ubiquitin ligase complex	Ubiquitin mediated proteolysis					0	1	NaN	-4.34294e-08	1	0	0	1	NaN
NaN	NaN	NaN	NaN	NaN	NaN	NaN	NaN	NaN	NaN	NaN	NaN	NaN	NaN	25.9567	25.6435	NaN	NaN	NaN	NaN	26.5239	NaN	25.8001	26.5239	NaN	0.221438	NaN	2	2	5.2	0	3.5271	3	establishment of localization;establishment of localization in cell;establishment of protein localization;intracellular protein transport;intracellular transport;protein targeting;protein targeting to membrane;protein transport;transport	calcium channel activity;cation channel activity;cation transmembrane transporter activity;channel activity;gated channel activity;high voltage-gated calcium channel activity;ion channel activity;ion transmembrane transporter activity;passive transmembrane transporter activity;substrate-specific channel activity;substrate-specific transmembrane transporter activity;substrate-specific transporter …	calcium channel complex;cation channel complex;cell part;cytoplasmic part;endoplasmic reticulum;intracellular membrane-bounded organelle;intracellular organelle;intracellular part;ion channel complex;macromolecular complex;membrane part;membrane-bounded organelle;organelle;plasma membrane part;protein complex;sarcoplasmic reticulum;T-tubule;voltage-gated calcium channel complex	Arrhythmogenic right ventricular cardiomyopathy (ARVC);Cardiac muscle contraction;Dilated cardiomyopathy;Hypertrophic cardiomyopathy (HCM);MAPK signaling pathway					0	1	NaN	0	1	-0.72378	0	1	NaN
30.6184	30.9442	31.8781	31.935	31.8237	31.8616	31.9254	31.9675	31.8027	32.1687	31.7557	31.3952	32.3995	32.4608	32.3418	32.2912	32.5435	32.5261	32.5597	32.1831	32.2673	31.8699	32.23	32.5261	0.526396	0.38153	0.177043	37	37	67.4	0	61.139	755	amine metabolic process;behavior;biological regulation;carboxylic acid metabolic process;cellular amine metabolic process;cellular amino acid metabolic process;cellular ketone metabolic process;cellular metabolic process;cellular nitrogen compound metabolic process;cellular process;cognition;learning or memory;long-term memory;memory;metabolic process;multicellular organismal process;neurological…	adenyl nucleotide binding;adenyl ribonucleotide binding;ATP binding;binding;catalytic activity;glutamate dehydrogenase (NAD+) activity;glutamate dehydrogenase [NAD(P)+] activity;GTP binding;guanyl nucleotide binding;guanyl ribonucleotide binding;nucleotide binding;oxidoreductase activity;oxidoreductase activity, acting on the CH-NH2 group of donors;oxidoreductase activity, acting on the CH-NH2 gr…	cell part;cytoplasmic part;intracellular organelle lumen;intracellular organelle part;intracellular part;membrane;membrane-enclosed lumen;mitochondrial inner membrane;mitochondrial matrix;mitochondrial membrane;mitochondrial part;organelle inner membrane;organelle lumen;organelle membrane;organelle part	Alanine, aspartate and glutamate metabolism;Arginine and proline metabolism;D-Glutamine and D-glutamate metabolism;Nitrogen metabolism;Proximal tubule bicarbonate reclamation	+			CTX_WT	2.09258	0.0319889	-0.796709	1.03472	0.310139	-0.339001	1.17829	0.11322	0.457708
35.251	35.1784	34.5362	34.8483	34.6675	34.7818	34.4785	34.3067	34.5204	34.3649	34.7293	34.6948	34.2945	34.3498	34.0051	33.8342	34.394	34.352	33.7443	33.8172	33.9927	34.7247	34.3574	33.9927	0.331151	0.311683	0.300006	62	61	78.4	0	229.89	1821	biological regulation;cell redox homeostasis;cellular homeostasis;cellular macromolecule metabolic process;cellular metabolic process;cellular process;cellular protein metabolic process;glycerol ether metabolic process;homeostatic process;macromolecule metabolic process;metabolic process;organic ether metabolic process;positive regulation of apoptosis;positive regulation of biological process;pos…	catalytic activity;disulfide oxidoreductase activity;electron carrier activity;intramolecular oxidoreductase activity;intramolecular oxidoreductase activity, interconverting keto- and enol-groups;intramolecular oxidoreductase activity, transposing S-S bonds;isomerase activity;oxidoreductase activity;oxidoreductase activity, acting on a sulfur group of donors;protein disulfide isomerase activity;p…	cell part;cell surface;cytoplasmic membrane-bounded vesicle;cytoplasmic part;cytoplasmic vesicle;endoplasmic reticulum;endoplasmic reticulum lumen;endoplasmic reticulum part;intracellular membrane-bounded organelle;intracellular organelle;intracellular organelle lumen;intracellular organelle part;intracellular part;melanosome;membrane-bounded organelle;membrane-bounded vesicle;membrane-enclosed l…	Antigen processing and presentation;Protein processing in endoplasmic reticulum	+			CTX_WT	2.54121	0.0213215	0.696045	0.895077	0.405865	0.289109	1.62005	0.0757399	-0.406936
27.4032	27.1235	28.4144	27.9766	27.9213	27.6447	28.2171	28.1476	27.3503	26.6742	26.9745	27.4317	27.8859	27.7905	28.1362	27.6864	26.9087	27.011	27.0599	26.7511	NaN	27.9489	27.559	26.9598	0.436283	0.486569	0.136452	10	10	57.3	0	13.086	94	anatomical structure development;biological regulation;brain development;cellular process;cellular response to stimulus;developmental process;establishment of localization;establishment of protein localization;eye development;intracellular signal transduction;organ development;protein transport;regulation of biological process;regulation of cellular process;response to stimulus;sensory organ deve…	binding;GDP binding;GTP binding;guanyl nucleotide binding;guanyl ribonucleotide binding;nucleotide binding;purine nucleotide binding;purine ribonucleoside triphosphate binding;purine ribonucleotide binding;ribonucleotide binding	apical plasma membrane;basal plasma membrane;cell part;intracellular;membrane part;plasma membrane part		+			CTX_WT	2.63171	0.0111438	0.923373	1.28302	0.145791	0.558535	0.864368	0.209451	-0.364837
NaN	NaN	27.3856	27.446	26.8075	26.3465	27.1649	27.2518	26.7213	26.7281	26.7312	25.9714	26.0721	26.7866	26.3641	26.7369	25.4938	NaN	NaN	NaN	NaN	27.2083	26.7247	25.4938	0.418402	0.3321	NaN	14	11	29.4	0	13.023	48	activation-induced cell death of T cells;aging;alcohol metabolic process;anagen;anatomical structure development;apoptosis;apoptotic mitochondrial changes;biological regulation;biosynthetic process;blood vessel development;carbohydrate biosynthetic process;carbohydrate homeostasis;carbohydrate metabolic process;carbohydrate transport;catabolic process;cell death;cell development;cell differentiat…	adenyl nucleotide binding;adenyl ribonucleotide binding;ATP binding;binding;catalytic activity;enzyme regulator activity;kinase activity;lipid binding;nitric-oxide synthase regulator activity;nucleotide binding;phosphatidylinositol binding;phosphatidylinositol-3,4,5-trisphosphate binding;phosphatidylinositol-3,4-bisphosphate binding;phospholipid binding;phosphotransferase activity, alcohol group …	cell part;cytoplasm;cytoplasmic part;cytoskeletal part;cytosol;intracellular membrane-bounded organelle;intracellular non-membrane-bounded organelle;intracellular organelle;intracellular organelle part;intracellular part;membrane;membrane-bounded organelle;non-membrane-bounded organelle;nuclear part;nucleoplasm;nucleus;organelle;organelle part;plasma membrane;spindle	Acute myeloid leukemia;Adipocytokine signaling pathway;Apoptosis;B cell receptor signaling pathway;Carbohydrate digestion and absorption;Chagas disease (American trypanosomiasis);Chemokine signaling pathway;Chronic myeloid leukemia;Colorectal cancer;Endometrial cancer;ErbB signaling pathway;Fc epsilon RI signaling pathway;Fc gamma R-mediated phagocytosis;Focal adhesion;Glioma;Hepatitis C;Insulin …			+	MDX_CTX	0	1	1.57323	0	1	1.02014	1.76578	0.0414508	-0.553094
NaN	NaN	NaN	NaN	NaN	NaN	24.5023	24.8675	NaN	NaN	NaN	NaN	NaN	NaN	NaN	NaN	NaN	NaN	NaN	NaN	NaN	24.6849	NaN	NaN	0.258257	NaN	NaN	6	6	3.7	0	3.3418	12	anatomical structure development;anterior/posterior pattern specification;biological regulation;biosynthetic process;brain development;cellular biosynthetic process;cellular component organization;cellular component organization at cellular level;cellular component organization or biogenesis;cellular component organization or biogenesis at cellular level;cellular macromolecule biosynthetic proces…	ATPase activity;ATPase activity, coupled;binding;catalytic activity;cation binding;DNA binding;DNA-dependent ATPase activity;hydrolase activity;hydrolase activity, acting on acid anhydrides;hydrolase activity, acting on acid anhydrides, in phosphorus-containing anhydrides;ion binding;metal ion binding;nucleic acid binding;nucleoside-triphosphatase activity;pyrophosphatase activity;sequence-specif…	cell part;chromatin remodeling complex;intracellular organelle part;intracellular part;ISWI complex;macromolecular complex;nuclear part;NURF complex;organelle part;protein complex						0	1	NaN	-4.34294e-08	1	0	0	1	NaN
27.1235	26.8586	25.3725	25.5232	25.9335	25.4725	25.3593	26.0279	NaN	NaN	NaN	25.3251	NaN	NaN	NaN	NaN	NaN	NaN	NaN	NaN	NaN	25.7283	25.3251	NaN	0.686703	NaN	NaN	8	8	6.2	0	9.302	26		binding;cation binding;ion binding;metal ion binding;nucleic acid binding;transition metal ion binding;zinc ion binding							0	1	NaN	0	1	NaN	0	1	-0.633749
24.7027	NaN	23.8511	23.9781	23.9212	25.4125	24.1987	24.1795	23.9568	NaN	NaN	NaN	23.5138	NaN	NaN	NaN	NaN	NaN	NaN	NaN	NaN	24.1795	23.7353	NaN	0.558317	0.313256	NaN	2	2	4.3	0.00016181	0.89198	9									0	1	NaN	0	1	NaN	0.675578	0.221258	-0.585275
NaN	NaN	NaN	NaN	NaN	NaN	NaN	NaN	NaN	NaN	NaN	NaN	NaN	NaN	NaN	NaN	NaN	NaN	NaN	NaN	NaN	NaN	NaN	NaN	NaN	NaN	NaN	6	1	76.8	0.0013863	0.65554	1		actin binding;actin filament binding;binding;cytoskeletal protein binding;ion transmembrane transporter activity;protein binding;substrate-specific transmembrane transporter activity;substrate-specific transporter activity;transmembrane transporter activity;transporter activity	adherens junction;anchoring junction;cell cortex part;cell junction;cell part;cell-substrate adherens junction;cell-substrate junction;cortical actin cytoskeleton;cortical cytoskeleton;cytoplasm;cytoplasmic part;cytoskeletal part;cytoskeleton;focal adhesion;intracellular non-membrane-bounded organelle;intracellular organelle;intracellular organelle part;intracellular part;non-membrane-bounded org…						-4.34294e-08	1	0	-4.34294e-08	1	0	-4.34294e-08	1	0
30.964	31.0945	30.6043	29.7138	30.1636	30.2262	28.2987	28.5071	30.7498	29.994	31.0075	29.8799	28.9756	29.0344	27.7607	27.6259	28.584	28.2191	28.5701	26.4045	NaN	30.1949	29.4571	28.3946	1.05239	1.26118	1.04043	6	4	95.6	0	24.134	123	biosynthetic process;cellular biosynthetic process;cellular macromolecule biosynthetic process;cellular macromolecule metabolic process;cellular metabolic process;cellular process;macromolecule biosynthetic process;macromolecule metabolic process;metabolic process;translational elongation	structural constituent of ribosome;structural molecule activity	cell part;cytoplasmic part;intracellular non-membrane-bounded organelle;intracellular organelle;intracellular part;macromolecular complex;non-membrane-bounded organelle;organelle;ribonucleoprotein complex;ribosome	Ribosome	+			CTX_WT	1.96157	0.0144171	2.0021	1.10025	0.107335	1.43404	0.462689	0.352216	-0.56806
NaN	NaN	NaN	NaN	NaN	NaN	NaN	NaN	NaN	NaN	NaN	NaN	NaN	NaN	NaN	NaN	NaN	NaN	NaN	26.7867	NaN	NaN	NaN	26.7867	NaN	NaN	NaN	3	3	15.9	0.0014098	0.72132	4	biological regulation;multicellular organismal process;muscle contraction;muscle system process;positive regulation of biological process;positive regulation of biosynthetic process;positive regulation of cellular biosynthetic process;positive regulation of cellular metabolic process;positive regulation of cellular process;positive regulation of gene expression;positive regulation of macromolecul…	binding;cation binding;ion binding;metal ion binding	cell part;contractile fiber part;cytoplasmic part;cytoskeletal part;intracellular membrane-bounded organelle;intracellular organelle;intracellular organelle part;intracellular part;macromolecular complex;membrane-bounded organelle;nucleus;organelle;organelle part;protein complex;troponin complex						0	1	NaN	0	1	NaN	-4.34294e-08	1	0
29.5262	28.973	30.3697	30.2586	30.7628	30.8374	31.0913	30.8895	28.4466	28.8317	27.6341	27.5802	29.1949	29.1155	28.6101	26.1521	25.9228	27.0306	25.3923	25.1849	NaN	30.5663	28.5284	25.6576	0.73979	1.02497	0.825929	38	38	54.6	0	80.41	223	cell cycle;cellular macromolecule metabolic process;cellular metabolic process;cellular nitrogen compound metabolic process;cellular process;DNA conformation change;DNA duplex unwinding;DNA geometric change;DNA metabolic process;DNA-dependent DNA replication initiation;macromolecule metabolic process;metabolic process;nitrogen compound metabolic process;nucleic acid metabolic process;nucleobase-c…	adenyl nucleotide binding;adenyl ribonucleotide binding;ATP binding;binding;catalytic activity;DNA binding;DNA helicase activity;helicase activity;hydrolase activity;hydrolase activity, acting on acid anhydrides;hydrolase activity, acting on acid anhydrides, in phosphorus-containing anhydrides;nucleic acid binding;nucleoside-triphosphatase activity;nucleotide binding;purine nucleotide binding;pur…	cell part;centrosome;chromosomal part;cytoplasm;cytoplasmic part;cytoskeletal part;intracellular membrane-bounded organelle;intracellular non-membrane-bounded organelle;intracellular organelle;intracellular organelle part;intracellular part;macromolecular complex;MCM complex;membrane-bounded organelle;microtubule organizing center;non-membrane-bounded organelle;nuclear chromosome part;nuclear par…	Cell cycle;Cell cycle - yeast;DNA replication;Meiosis - yeast	+	+	+	CTX_WT;MDX_CTX;MDX_WT	5.59181	0	4.4559	2.52553	0.00427473	2.313	3.54472	0.00037594	-2.1429
26.4296	26.9468	NaN	25.9726	25.782	26.1134	NaN	NaN	25.9593	26.5247	NaN	NaN	NaN	NaN	NaN	NaN	26.026	NaN	NaN	NaN	NaN	26.1134	26.242	26.026	0.456203	0.399749	NaN	8	6	51.3	0	4.8569	26	biological regulation;cardiac muscle contraction;multicellular organismal process;muscle contraction;muscle system process;positive regulation of ATPase activity;positive regulation of catalytic activity;positive regulation of hydrolase activity;positive regulation of molecular function;regulation of ATPase activity;regulation of biological process;regulation of biological quality;regulation of c…	binding;calcium ion binding;cation binding;ion binding;metal ion binding	A band;cell part;contractile fiber part;cytoplasmic part;cytoskeletal part;intracellular organelle part;intracellular part;macromolecular complex;myosin complex;organelle part;protein complex						0	1	0.222913	0	1	0.216015	0.00614554	1	-0.0068985
26.1892	NaN	25.9768	25.3087	25.54	25.38	26.0882	26.4994	NaN	NaN	NaN	NaN	NaN	NaN	NaN	25.0165	NaN	NaN	NaN	NaN	NaN	25.9768	25.0165	NaN	0.450833	NaN	NaN	9	9	21.5	0	7.4187	25									0	1	NaN	0	1	NaN	0	1	-0.838085
NaN	NaN	NaN	NaN	26.3141	25.3674	25.9196	26.4928	NaN	NaN	NaN	NaN	NaN	NaN	NaN	NaN	NaN	NaN	NaN	NaN	NaN	26.1168	NaN	NaN	0.498639	NaN	NaN	3	3	19.9	0	5.2928	14	cellular component disassembly;cellular component disassembly at cellular level;cellular component organization;cellular component organization at cellular level;cellular component organization or biogenesis;cellular component organization or biogenesis at cellular level;cellular macromolecular complex disassembly;cellular macromolecular complex subunit organization;cellular process;cellular prot…	aminoacyl-tRNA hydrolase activity;binding;carboxylic ester hydrolase activity;catalytic activity;hydrolase activity;hydrolase activity, acting on ester bonds;nucleic acid binding;RNA binding;translation factor activity, nucleic acid binding;translation release factor activity;translation release factor activity, codon nonspecific;translation termination factor activity	cell part;cytoplasmic part;intracellular membrane-bounded organelle;intracellular organelle;intracellular organelle part;intracellular part;large ribosomal subunit;macromolecular complex;membrane-bounded organelle;mitochondrial large ribosomal subunit;mitochondrial part;mitochondrion;organellar large ribosomal subunit;organelle;organelle part;ribonucleoprotein complex						0	1	NaN	-4.34294e-08	1	0	0	1	NaN
28.9418	28.6285	29.2125	28.8607	29.3814	28.7589	28.8546	29.0675	29.2153	29.7318	28.748	28.4219	29.522	29.6755	29.1443	29.6739	29.6208	29.3078	29.3693	30.6174	29.8648	28.9013	29.3686	29.6208	0.246214	0.480288	0.529732	4	4	60.2	0	8.3449	118		catalytic activity;cation transmembrane transporter activity;cytochrome-c oxidase activity;electron carrier activity;heme-copper terminal oxidase activity;hydrogen ion transmembrane transporter activity;inorganic cation transmembrane transporter activity;ion transmembrane transporter activity;monovalent inorganic cation transmembrane transporter activity;oxidoreductase activity;oxidoreductase act…	cell part;cytoplasmic part;intracellular organelle part;intracellular part;membrane;membrane part;mitochondrial inner membrane;mitochondrial membrane;mitochondrial membrane part;mitochondrial part;mitochondrial respiratory chain;organelle inner membrane;organelle membrane;organelle part;respiratory chain	Alzheimer's disease;Cardiac muscle contraction;Huntington's disease;Oxidative phosphorylation;Parkinson's disease	+			CTX_WT	2.46214	0.0189675	-0.792792	0.946158	0.265496	-0.489446	0.872165	0.233667	0.303345
NaN	NaN	25.3358	NaN	25.4245	NaN	NaN	NaN	NaN	NaN	NaN	NaN	NaN	NaN	NaN	NaN	NaN	NaN	NaN	NaN	NaN	25.3802	NaN	NaN	0.0627347	NaN	NaN	5	5	5.9	0	6.6632	9	biological regulation;cellular component organization;cellular component organization at cellular level;cellular component organization or biogenesis;cellular component organization or biogenesis at cellular level;cellular process;cytoskeleton organization;organelle organization;regulation of anatomical structure morphogenesis;regulation of biological process;regulation of cell morphogenesis;regu…	binding;cation binding;ion binding;metal ion binding;transition metal ion binding;zinc ion binding							0	1	NaN	-4.34294e-08	1	0	0	1	NaN
26.9362	27.1293	27.5678	27.2462	27.004	26.7523	26.312	25.9464	27.0904	27.2609	26.5588	26.0187	27.9597	27.9976	27.7845	27.359	26.9141	NaN	27.8113	29.8922	29.1877	26.9701	27.3099	28.4995	0.520412	0.694838	1.34053	18	14	26	0	7.1933	84	biological regulation;catabolic process;cell migration;cell motility;cellular catabolic process;cellular component movement;cellular metabolic process;cellular process;cellular response to chemical stimulus;cellular response to hydrogen peroxide;cellular response to oxidative stress;cellular response to reactive oxygen species;cellular response to stimulus;cellular response to stress;defense resp…	antioxidant activity;binding;catalytic activity;cation binding;heme binding;ion binding;iron ion binding;metal ion binding;oxidoreductase activity;oxidoreductase activity, acting on peroxide as acceptor;peroxidase activity;tetrapyrrole binding;transition metal ion binding		Asthma	+			CTX_WT	1.905	0.0193024	-1.58956	1.19852	0.0937253	-1.19763	0.652888	0.274065	0.391934
NaN	NaN	NaN	NaN	NaN	NaN	NaN	NaN	NaN	NaN	NaN	NaN	NaN	NaN	NaN	NaN	NaN	NaN	NaN	NaN	31.0216	NaN	NaN	31.0216	NaN	NaN	NaN	1	1	0.4	0.0099673	0.29988	26	biological regulation;regulation of biological process;regulation of biosynthetic process;regulation of cellular biosynthetic process;regulation of cellular macromolecule biosynthetic process;regulation of cellular metabolic process;regulation of cellular process;regulation of gene expression;regulation of macromolecule biosynthetic process;regulation of macromolecule metabolic process;regulation…	binding;cation binding;DNA binding;ion binding;metal ion binding;nucleic acid binding;transition metal ion binding;zinc ion binding	cell part;cytoplasmic part;Golgi apparatus;intracellular membrane-bounded organelle;intracellular organelle;intracellular part;membrane-bounded organelle;nucleus;organelle						0	1	NaN	0	1	NaN	-4.34294e-08	1	0
NaN	NaN	NaN	NaN	NaN	NaN	NaN	21.9038	NaN	NaN	NaN	NaN	NaN	NaN	NaN	NaN	NaN	NaN	NaN	NaN	NaN	21.9038	NaN	NaN	NaN	NaN	NaN	2	2	4.6	0.00064	0.82488	3	amine biosynthetic process;amine metabolic process;aspartate family amino acid biosynthetic process;aspartate family amino acid metabolic process;biosynthetic process;carboxylic acid biosynthetic process;carboxylic acid metabolic process;cellular amine metabolic process;cellular amino acid biosynthetic process;cellular amino acid metabolic process;cellular aromatic compound metabolic process;cell…	amine binding;amino acid binding;binding;carboxylic acid binding;catalytic activity;methylenetetrahydrofolate reductase (NADPH) activity;modified amino acid binding;oxidoreductase activity;oxidoreductase activity, acting on the CH-NH group of donors;oxidoreductase activity, acting on the CH-NH group of donors, NAD or NADP as acceptor		Carbon fixation pathways in prokaryotes;Methane metabolism;One carbon pool by folate					0	1	NaN	-4.34294e-08	1	0	0	1	NaN
26.4529	NaN	25.7294	25.5096	25.5076	25.4642	26.7033	NaN	26.5955	27.3636	26.8271	25.74	26.408	26.6255	NaN	NaN	27.7803	27.9833	26.3266	NaN	27.9042	25.6195	26.6105	27.8422	0.54337	0.531325	0.785795	2	2	32.6	0	5.5839	53	astrocyte differentiation;behavior;biological regulation;calcium ion homeostasis;cation homeostasis;cell differentiation;cellular calcium ion homeostasis;cellular cation homeostasis;cellular chemical homeostasis;cellular developmental process;cellular divalent inorganic cation homeostasis;cellular homeostasis;cellular ion homeostasis;cellular metabolic process;cellular metal ion homeostasis;cellu…	binding;calcium ion binding;cation binding;cytoskeletal protein binding;identical protein binding;ion binding;metal ion binding;protein binding;protein dimerization activity;protein homodimerization activity;tau protein binding;transition metal ion binding;zinc ion binding	cell body;cell part;cell projection;cytoplasm;cytoplasmic part;extracellular region;extracellular region part;extracellular space;intracellular membrane-bounded organelle;intracellular organelle;intracellular part;membrane-bounded organelle;neuronal cell body;nucleus;organelle;perinuclear region of cytoplasm;ruffle		+			CTX_WT	2.31332	0.00829245	-1.60407	1.22629	0.105353	-0.905311	1.31876	0.060221	0.698761
NaN	NaN	NaN	NaN	NaN	NaN	NaN	NaN	NaN	24.2908	NaN	NaN	NaN	NaN	NaN	NaN	NaN	NaN	NaN	NaN	NaN	NaN	24.2908	NaN	NaN	NaN	NaN	1	1	1.6	0	2.5991	4	biosynthetic process;cellular biosynthetic process;cellular component organization;cellular component organization at cellular level;cellular component organization or biogenesis;cellular component organization or biogenesis at cellular level;cellular macromolecule biosynthetic process;cellular macromolecule metabolic process;cellular metabolic process;cellular nitrogen compound metabolic process…	binding;cation binding;chromatin binding;DNA binding;ion binding;metal ion binding;nucleic acid binding;nucleic acid binding transcription factor activity;sequence-specific DNA binding;sequence-specific DNA binding transcription factor activity;transition metal ion binding;zinc ion binding	cell part;chromatin remodeling complex;cytoplasmic part;histone deacetylase complex;intracellular membrane-bounded organelle;intracellular organelle;intracellular organelle part;intracellular part;macromolecular complex;membrane-bounded organelle;mitochondrion;nuclear body;nuclear part;nucleoplasm part;organelle;organelle part;PML body;protein complex						-4.34294e-08	1	0	0	1	NaN	0	1	NaN
28.451	NaN	NaN	NaN	NaN	26.4279	NaN	NaN	NaN	NaN	NaN	NaN	NaN	NaN	NaN	NaN	NaN	NaN	NaN	NaN	NaN	27.4394	NaN	NaN	1.43056	NaN	NaN	6	2	6.4	0.00016829	1.1053	3	actin cytoskeleton organization;actin filament-based process;biological regulation;cellular component organization;cellular component organization at cellular level;cellular component organization or biogenesis;cellular component organization or biogenesis at cellular level;cellular process;cortical actin cytoskeleton organization;cortical cytoskeleton organization;cytoskeleton organization;organ…	1-phosphatidylinositol binding;actin binding;binding;cytoskeletal protein binding;lipid binding;phosphatidylinositol binding;phospholipid binding;protein binding;spectrin binding;structural molecule activity	actin cytoskeleton;cell cortex part;cell part;cortical cytoskeleton;cytoplasmic part;cytoskeleton;extrinsic to membrane;Golgi apparatus;intracellular membrane-bounded organelle;intracellular non-membrane-bounded organelle;intracellular organelle;intracellular part;macromolecular complex;membrane;membrane part;membrane-bounded organelle;non-membrane-bounded organelle;nucleus;organelle;plasma membr…	Tight junction					0	1	NaN	-4.34294e-08	1	0	0	1	NaN
NaN	NaN	NaN	NaN	NaN	NaN	NaN	NaN	NaN	NaN	NaN	NaN	NaN	NaN	NaN	NaN	NaN	NaN	NaN	NaN	NaN	NaN	NaN	NaN	NaN	NaN	NaN	33	1	22.5	0.0039964	0.47311	1	biological adhesion;biological regulation;cell adhesion;cell junction assembly;cell junction organization;cell motility;cell projection assembly;cell projection organization;cell surface receptor linked signaling pathway;cell-matrix adhesion;cell-substrate adhesion;cell-substrate junction assembly;cellular component assembly;cellular component assembly at cellular level;cellular component movemen…	receptor activity	basal plasma membrane;basement membrane;cell junction;cell leading edge;cell part;cell-substrate junction;extracellular matrix part;extracellular region part;hemidesmosome;integrin complex;macromolecular complex;membrane part;plasma membrane part;protein complex;receptor complex						-4.34294e-08	1	0	-4.34294e-08	1	0	-4.34294e-08	1	0
26.9135	27.1262	26.6967	26.9644	26.6527	26.9537	27.0588	26.9748	26.5401	26.7988	27.158	27.4312	27.6341	27.7905	27.8032	27.1876	27.1074	27.2092	27.4281	28.087	28.2467	26.9591	27.3094	27.4281	0.164416	0.460375	0.519387	9	9	17	0	5.289	59	female pregnancy;lipid metabolic process;metabolic process;multi-organism process;primary metabolic process;reproductive process;steroid metabolic process	binding;catalytic activity;cation binding;hydrolase activity;hydrolase activity, acting on ester bonds;ion binding;metal ion binding;steryl-sulfatase activity;sulfuric ester hydrolase activity	cell part;cytoplasmic part;endoplasmic reticulum membrane;endoplasmic reticulum part;integral to membrane;intracellular organelle part;intracellular part;intrinsic to membrane;membrane;membrane part;organelle membrane;organelle part	Steroid hormone biosynthesis	+			CTX_WT	2.38456	0.0258303	-0.698069	0.575733	0.564474	-0.32273	1.32279	0.115916	0.37534
26.3732	NaN	27.9596	28.4392	27.6012	27.2361	29.2069	28.8047	27.2819	26.7562	27.6148	27.3021	26.9367	27.0255	27.7491	27.3336	NaN	NaN	NaN	NaN	NaN	27.9596	27.292	NaN	0.971868	0.334919	NaN	4	4	33.1	0	7.8106	50									0	1	NaN	0	1	NaN	1.10428	0.0884488	-0.695871
NaN	NaN	25.1722	26.059	25.6719	25.2212	25.1524	24.9525	25.1203	25.5357	25.5632	NaN	25.7446	25.8434	NaN	NaN	NaN	NaN	NaN	NaN	NaN	25.1967	25.5632	NaN	0.41202	0.277648	NaN	7	6	20.4	0	5.3908	38	activation of Ral GTPase activity;activation of Ras GTPase activity;alcohol metabolic process;apoptosis;biological regulation;biosynthetic process;carbohydrate biosynthetic process;carbohydrate metabolic process;carbohydrate transport;cell death;cell surface receptor linked signaling pathway;cellular biosynthetic process;cellular carbohydrate biosynthetic process;cellular carbohydrate metabolic p…	adenyl nucleotide binding;adenyl ribonucleotide binding;ATP binding;binding;catalytic activity;kinase activity;lipid binding;nucleotide binding;phospholipid binding;phosphotransferase activity, alcohol group as acceptor;protein kinase activity;protein serine/threonine kinase activity;purine nucleotide binding;purine ribonucleoside triphosphate binding;purine ribonucleotide binding;ribonucleotide …	cell cortex;cell part;cell projection membrane;cell projection part;cytoplasmic part;intracellular membrane-bounded organelle;intracellular organelle;intracellular part;leading edge membrane;membrane part;membrane-bounded organelle;nucleus;organelle;plasma membrane part;ruffle membrane	Acute myeloid leukemia;Adipocytokine signaling pathway;Apoptosis;B cell receptor signaling pathway;Carbohydrate digestion and absorption;Chagas disease (American trypanosomiasis);Chemokine signaling pathway;Chronic myeloid leukemia;Colorectal cancer;Endometrial cancer;ErbB signaling pathway;Fc epsilon RI signaling pathway;Fc gamma R-mediated phagocytosis;Focal adhesion;Glioma;Hepatitis C;Insulin …					0	1	NaN	0	1	NaN	0.393024	0.533258	0.189886
NaN	NaN	NaN	NaN	23.085	NaN	NaN	NaN	NaN	NaN	NaN	NaN	NaN	NaN	NaN	NaN	NaN	NaN	NaN	NaN	NaN	23.085	NaN	NaN	NaN	NaN	NaN	1	1	1.6	0	3.1284	3	biological regulation;biosynthetic process;cardiac muscle adaptation;cardiac muscle hypertrophy;cardiac muscle hypertrophy in response to stress;cellular biosynthetic process;cellular macromolecule biosynthetic process;cellular macromolecule metabolic process;cellular metabolic process;cellular nitrogen compound metabolic process;cellular process;macromolecule biosynthetic process;macromolecule m…	binding;catalytic activity;cation binding;demethylase activity;dioxygenase activity;histone binding;histone demethylase activity;histone demethylase activity (H3-K36 specific);ion binding;metal ion binding;methylated histone residue binding;oxidoreductase activity;oxidoreductase activity, acting on paired donors, with incorporation or reduction of molecular oxygen;oxidoreductase activity, acting …	cell part;centrosome;cytoplasm;cytoplasmic part;cytoskeletal part;intracellular membrane-bounded organelle;intracellular non-membrane-bounded organelle;intracellular organelle;intracellular organelle part;intracellular part;membrane-bounded organelle;microtubule organizing center;non-membrane-bounded organelle;nuclear part;nucleolus;nucleus;organelle;organelle part						0	1	NaN	-4.34294e-08	1	0	0	1	NaN
24.8258	NaN	NaN	NaN	NaN	NaN	NaN	NaN	NaN	NaN	NaN	NaN	NaN	NaN	NaN	NaN	NaN	NaN	NaN	NaN	NaN	24.8258	NaN	NaN	NaN	NaN	NaN	3	3	4.9	0	2.814	7	cellular component assembly;cellular component assembly at cellular level;cellular component organization;cellular component organization at cellular level;cellular component organization or biogenesis;cellular component organization or biogenesis at cellular level;cellular macromolecular complex assembly;cellular macromolecular complex subunit organization;cellular process;cellular protein compl…	1-phosphatidylinositol binding;binding;cation binding;ion binding;lipid binding;metal ion binding;phosphatidylinositol binding;phospholipid binding	cell part;cytoplasmic part;early endosome membrane;endosomal part;endosome membrane;intracellular organelle part;intracellular part;membrane;organelle membrane;organelle part	Endocytosis;TGF-beta signaling pathway					0	1	NaN	-4.34294e-08	1	0	0	1	NaN
26.604	26.4944	25.9021	25.5155	26.9833	26.5749	26.2407	25.7966	NaN	NaN	NaN	26.1524	NaN	NaN	NaN	NaN	NaN	NaN	NaN	NaN	NaN	26.3675	26.1524	NaN	0.491777	NaN	NaN	8	8	39.7	0	16.096	25	biological regulation;cell surface receptor linked signaling pathway;cellular component organization;cellular component organization or biogenesis;cellular process;cellular response to stimulus;enzyme linked receptor protein signaling pathway;negative regulation of biological process;negative regulation of catalytic activity;negative regulation of cell communication;negative regulation of cell si…		cell part;cytoplasm;cytoplasmic part;cytosolic part;intracellular membrane-bounded organelle;intracellular organelle;intracellular part;macromolecular complex;membrane-bounded organelle;nucleus;organelle;protein complex;TORC1 complex						0	0.677491	NaN	0	0.693163	NaN	0	0.68063	-0.111545
29.0428	29.022	28.1881	28.1455	28.1937	28.4101	27.2386	27.0652	27.6697	27.5817	28.0482	28.2379	27.9043	27.719	NaN	NaN	NaN	NaN	26.6827	NaN	NaN	28.1909	27.8117	26.6827	0.720578	0.250505	NaN	10	10	16	0	28.588	67	cellular macromolecule metabolic process;cellular metabolic process;cellular nitrogen compound metabolic process;cellular process;macromolecule metabolic process;metabolic process;mRNA metabolic process;mRNA processing;nitrogen compound metabolic process;nuclear mRNA splicing, via spliceosome;nucleic acid metabolic process;nucleobase-containing compound metabolic process;primary metabolic process…	binding;DNA binding;nucleic acid binding	catalytic step 2 spliceosome;cell part;intracellular organelle part;intracellular part;macromolecular complex;nuclear body;nuclear matrix;nuclear part;nuclear speck;nucleoplasm part;organelle part;ribonucleoprotein complex;spliceosomal complex	mRNA surveillance pathway;RNA transport					0	1	1.48055	0	1	1.17742	0.459496	0.418263	-0.303128
NaN	NaN	NaN	NaN	NaN	NaN	NaN	22.6292	NaN	NaN	NaN	NaN	NaN	NaN	NaN	NaN	NaN	NaN	NaN	NaN	NaN	22.6292	NaN	NaN	NaN	NaN	NaN	4	2	9	0	1.7812	4	biological regulation;cellular component organization;cellular component organization at cellular level;cellular component organization or biogenesis;cellular component organization or biogenesis at cellular level;cellular macromolecule metabolic process;cellular metabolic process;cellular process;cellular protein metabolic process;cellular response to chemical stimulus;cellular response to endog…	adenyl nucleotide binding;adenyl ribonucleotide binding;ATP binding;binding;catalytic activity;kinase activity;lipid binding;nucleotide binding;phospholipid binding;phosphotransferase activity, alcohol group as acceptor;protein kinase activity;protein serine/threonine kinase activity;purine nucleotide binding;purine ribonucleoside triphosphate binding;purine ribonucleotide binding;ribonucleotide …	cell part;cytoplasmic part;Golgi apparatus;intracellular membrane-bounded organelle;intracellular organelle;intracellular part;membrane;membrane-bounded organelle;nucleus;organelle;plasma membrane	Acute myeloid leukemia;Adipocytokine signaling pathway;Apoptosis;B cell receptor signaling pathway;Carbohydrate digestion and absorption;Chagas disease (American trypanosomiasis);Chemokine signaling pathway;Chronic myeloid leukemia;Colorectal cancer;Endometrial cancer;ErbB signaling pathway;Fc epsilon RI signaling pathway;Fc gamma R-mediated phagocytosis;Focal adhesion;Glioma;Hepatitis C;Insulin …					0	0.635241	NaN	-4.34294e-08	1	0	0	0.654718	NaN
25.817	NaN	NaN	NaN	NaN	26.3654	25.3546	26.1524	26.3321	NaN	25.5208	25.4704	26.6945	26.2755	28.5822	27.2746	27.5886	27.6822	26.5491	28.6891	28.0463	25.9847	26.3321	27.6822	0.440704	1.08093	0.78021	5	5	23.6	0	4.7796	32	establishment of localization;establishment of localization in cell;establishment of RNA localization;intracellular transport;mitochondrial transport;nucleic acid transport;nucleobase-containing compound transport;RNA import into mitochondrion;RNA transport;rRNA import into mitochondrion;rRNA transport;transport	5S rRNA binding;binding;catalytic activity;nucleic acid binding;RNA binding;rRNA binding;sulfurtransferase activity;thiosulfate sulfurtransferase activity;transferase activity;transferase activity, transferring sulfur-containing groups	cell part;cytoplasmic part;intracellular organelle lumen;intracellular organelle part;intracellular part;membrane;membrane-enclosed lumen;mitochondrial inner membrane;mitochondrial matrix;mitochondrial membrane;mitochondrial part;organelle inner membrane;organelle lumen;organelle membrane;organelle part;plasma membrane	Cysteine and methionine metabolism;Sulfur relay system	+			CTX_WT	2.31855	0.00680338	-1.78871	1.10906	0.120785	-1.1182	0.562088	0.26847	0.670507
30.3323	30.3138	29.848	29.8312	29.2067	29.6208	27.7757	28.989	29.7266	30.2014	29.291	29.7092	29.2506	29.5917	29.6593	29.5791	NaN	NaN	26.3965	NaN	28.3163	29.726	29.6255	27.3564	0.838341	0.294172	1.35748	20	20	57.2	0	30.918	153	acylglycerol metabolic process;aging;alcohol metabolic process;anatomical structure morphogenesis;artery morphogenesis;biological regulation;biosynthetic process;blood vessel morphogenesis;calcium ion homeostasis;catabolic process;cation homeostasis;cell differentiation;cell surface receptor linked signaling pathway;cellular biosynthetic process;cellular calcium ion homeostasis;cellular catabolic…	antioxidant activity;beta-amyloid binding;binding;carbohydrate binding;cation binding;cholesterol transporter activity;enzyme activator activity;enzyme regulator activity;glycosaminoglycan binding;heparin binding;hydroxyapatite binding;ion binding;lipid binding;lipid transporter activity;lipoprotein particle binding;metal chelating activity;metal ion binding;pattern binding;phosphatidylcholine-st…	cell body;cell part;cell projection;chylomicron;cytoplasmic part;cytosol;dendrite;endosome;extracellular region part;extracellular space;extrinsic to external side of plasma membrane;extrinsic to membrane;extrinsic to plasma membrane;Golgi apparatus;high-density lipoprotein particle;intermediate-density lipoprotein particle;intracellular membrane-bounded organelle;intracellular organelle;intracel…	Alzheimer's disease	+	+		CTX_WT;MDX_WT	1.72456	0.0221683	2.13326	3.07931	0.00189558	2.26969	0.173487	0.774305	0.136426
NaN	NaN	NaN	NaN	NaN	26.7119	NaN	NaN	24.575	NaN	25.5661	NaN	NaN	NaN	NaN	NaN	NaN	NaN	NaN	NaN	NaN	26.7119	25.0705	NaN	NaN	0.700779	NaN	1	1	5.2	0	1.9844	8	cellular macromolecule metabolic process;cellular metabolic process;cellular process;cellular protein metabolic process;macromolecule metabolic process;macromolecule modification;metabolic process;primary metabolic process;protein metabolic process;protein modification by small protein conjugation;protein modification by small protein conjugation or removal;protein modification process;protein ub…	protein binding transcription factor activity;RNA polymerase II transcription cofactor activity;RNA polymerase II transcription factor binding transcription factor activity;transcription cofactor activity;transcription factor binding transcription factor activity	cell part;intracellular organelle part;intracellular part;macromolecular complex;mediator complex;nuclear part;nucleoplasm part;organelle part;protein complex						0	1	NaN	0	1	NaN	0	1	-1.64133
28.153	27.7269	NaN	NaN	27.7323	27.0601	27.3063	27.4617	NaN	27.0167	NaN	NaN	NaN	26.8404	NaN	NaN	NaN	NaN	NaN	NaN	NaN	27.5943	26.9285	NaN	0.382632	0.124678	NaN	5	5	41.8	0	8.7674	34	cellular process;establishment of localization;establishment of protein localization;protein transport;transport;vesicle-mediated transport		cell part;cytoplasmic part;endoplasmic reticulum membrane;endoplasmic reticulum part;Golgi apparatus part;Golgi membrane;Golgi stack;integral to membrane;intracellular organelle part;intracellular part;intrinsic to membrane;membrane;membrane part;organelle membrane;organelle part	SNARE interactions in vesicular transport					0	1	NaN	0	1	NaN	1.17662	0.0803122	-0.644838
25.2743	NaN	25.4052	25.1702	26.0355	25.6587	NaN	NaN	NaN	25.8388	NaN	NaN	NaN	NaN	NaN	26.1537	NaN	NaN	NaN	NaN	NaN	25.4052	25.9962	NaN	0.346508	0.222703	NaN	3	3	4	0	1.6438	16	adult behavior;adult locomotory behavior;alcohol metabolic process;anatomical structure development;apoptosis;associative learning;axon cargo transport;axon choice point recognition;axon midline choice point recognition;behavior;behavioral interaction between organisms;biological adhesion;biological regulation;calcium ion homeostasis;cation homeostasis;cell adhesion;cell death;cell growth;cell ma…	binding;carbohydrate binding;cation binding;DNA binding;endopeptidase inhibitor activity;endopeptidase regulator activity;enzyme activator activity;enzyme inhibitor activity;enzyme regulator activity;glycosaminoglycan binding;heparin binding;ion binding;metal ion binding;nucleic acid binding;pattern binding;peptidase activator activity;peptidase inhibitor activity;peptidase regulator activity;pol…	apical part of cell;axon;cell part;cell projection;cell projection part;cell surface;ciliary rootlet;cilium part;coated pit;cytoplasmic part;cytoplasmic vesicle;cytoskeletal part;dendritic shaft;dendritic spine;Golgi apparatus;integral to membrane;intracellular membrane-bounded organelle;intracellular organelle;intracellular organelle part;intracellular part;intrinsic to membrane;membrane;membran…	Alzheimer's disease					0	1	NaN	0	1	NaN	0.874508	0.167869	0.487469
NaN	NaN	NaN	NaN	NaN	NaN	NaN	24.643	NaN	NaN	NaN	NaN	NaN	NaN	NaN	NaN	NaN	NaN	NaN	NaN	NaN	24.643	NaN	NaN	NaN	NaN	NaN	2	2	10.5	0.0019832	0.61474	3	biosynthetic process;cellular biosynthetic process;cellular metabolic process;cellular nitrogen compound biosynthetic process;cellular nitrogen compound metabolic process;cellular process;coenzyme biosynthetic process;coenzyme metabolic process;cofactor biosynthetic process;cofactor metabolic process;heterocycle biosynthetic process;heterocycle metabolic process;metabolic process;NAD metabolic pr…	adenyl nucleotide binding;adenyl ribonucleotide binding;ATP binding;binding;catalytic activity;cation binding;ion binding;kinase activity;metal ion binding;NAD+ kinase activity;nucleotide binding;phosphotransferase activity, alcohol group as acceptor;purine nucleotide binding;purine ribonucleoside triphosphate binding;purine ribonucleotide binding;ribonucleotide binding;transferase activity;trans…	cell part;cytoplasmic part;cytosol;intracellular part	Nicotinate and nicotinamide metabolism					0	1	NaN	-4.34294e-08	1	0	0	1	NaN
27.6252	27.9831	29.1274	29.2218	29.0611	28.6846	29.551	29.557	28.1044	28.2885	28.3992	28.2197	28.5302	28.3195	29.3286	29.352	27.7643	27.4477	26.8867	28.3188	28.549	29.0942	28.3594	27.7643	0.710131	0.492677	0.668849	13	11	54.6	0	15.178	146	chordate embryonic development;developmental process;embryo development;embryo development ending in birth or egg hatching;establishment of localization;in utero embryonic development;transport	binding;lipid binding;phospholipid binding	cell part;cytoplasmic part;Golgi apparatus;intracellular;intracellular membrane-bounded organelle;intracellular organelle;intracellular part;membrane-bounded organelle;organelle		+			CTX_WT	1.66084	0.0469384	1.05808	1.46246	0.0782084	0.774441	0.432937	0.446482	-0.283636
30.7231	30.4235	32.029	31.6485	31.9716	31.9296	31.8243	31.8451	32.1867	31.9009	31.7878	31.6053	32.2916	32.4449	32.6091	32.3001	32.3816	32.392	32.6621	32.7396	32.3268	31.8347	32.2392	32.392	0.618298	0.344545	0.186642	30	28	56.4	0	47.787	538	2-oxoglutarate metabolic process;acetyl-CoA catabolic process;acetyl-CoA metabolic process;carbohydrate metabolic process;carboxylic acid metabolic process;catabolic process;cellular aldehyde metabolic process;cellular carbohydrate metabolic process;cellular catabolic process;cellular ketone metabolic process;cellular metabolic process;cellular process;coenzyme catabolic process;coenzyme metaboli…	binding;catalytic activity;cation binding;coenzyme binding;cofactor binding;ion binding;isocitrate dehydrogenase (NADP+) activity;isocitrate dehydrogenase activity;magnesium ion binding;metal ion binding;NAD binding;nucleotide binding;oxidoreductase activity;oxidoreductase activity, acting on CH-OH group of donors;oxidoreductase activity, acting on the CH-OH group of donors, NAD or NADP as accept…	cell part;cytoplasmic part;intracellular organelle part;intracellular part;membrane;mitochondrial inner membrane;mitochondrial membrane;mitochondrial part;organelle inner membrane;organelle membrane;organelle part	Carbon fixation pathways in prokaryotes;Citrate cycle (TCA cycle);Glutathione metabolism;Peroxisome	+			CTX_WT	2.14824	0.0220216	-0.951069	1.24279	0.233762	-0.359625	1.4801	0.0561199	0.591445
NaN	NaN	NaN	NaN	NaN	NaN	NaN	23.1071	NaN	NaN	NaN	NaN	NaN	NaN	NaN	NaN	NaN	NaN	NaN	NaN	NaN	23.1071	NaN	NaN	NaN	NaN	NaN	3	2	5	0	2.7424	4	biological regulation;cellular process;establishment of localization;establishment of localization in cell;establishment of protein localization;intracellular protein transport;intracellular transport;positive regulation of biological process;positive regulation of catabolic process;positive regulation of macromolecule metabolic process;positive regulation of metabolic process;positive regulation…		AP-type membrane coat adaptor complex;cell part;clathrin adaptor complex;cytoplasmic part;endosomal part;endosome membrane;Golgi apparatus;Golgi apparatus part;intracellular membrane-bounded organelle;intracellular organelle;intracellular organelle part;intracellular part;macromolecular complex;membrane;membrane part;membrane-bounded organelle;organelle;organelle membrane;organelle part;protein c…	Lysosome					0	1	NaN	-4.34294e-08	1	0	0	1	NaN
NaN	NaN	NaN	NaN	NaN	NaN	NaN	NaN	NaN	NaN	NaN	NaN	NaN	NaN	NaN	24.58	NaN	NaN	NaN	NaN	NaN	NaN	24.58	NaN	NaN	NaN	NaN	11	1	22	0.0080738	0.36075	2	anatomical structure arrangement;anatomical structure development;anatomical structure homeostasis;biological regulation;cell development;cellular developmental process;cellular homeostasis;cellular localization;cellular macromolecule metabolic process;cellular metabolic process;cellular process;cranial nerve structural organization;developmental process;endothelial cell development;epithelial ce…	binding;calcium ion binding;cation binding;ion binding;metal ion binding;transition metal ion binding;zinc ion binding	cell junction;cell part;cell projection part;cell-substrate junction;contractile fiber part;cytoplasmic part;dystrophin-associated glycoprotein complex;intracellular part;macromolecular complex;membrane;membrane part;membrane raft;neuron projection terminus;organelle part;plasma membrane;plasma membrane part;protein complex;sarcolemma;synapse;Z disc						-4.34294e-08	1	0	0	1	NaN	0	1	NaN
29.8512	29.6289	29.8916	29.4102	30.0639	30.3091	30.0576	31.0293	29.9347	29.77	29.5417	30.2024	29.8399	30.1411	29.0542	29.1454	29.9596	29.248	28.6645	28.8223	29.1513	29.9746	29.8049	29.1513	0.489091	0.426984	0.501588	9	9	70.9	0	10.431	107		catalytic activity;cation transmembrane transporter activity;cytochrome-c oxidase activity;heme-copper terminal oxidase activity;hydrogen ion transmembrane transporter activity;inorganic cation transmembrane transporter activity;ion transmembrane transporter activity;monovalent inorganic cation transmembrane transporter activity;oxidoreductase activity;oxidoreductase activity, acting on a heme gr…	cell part;cytoplasmic part;intracellular organelle part;intracellular part;membrane;membrane-enclosed lumen;mitochondrial inner membrane;mitochondrial intermembrane space;mitochondrial membrane;mitochondrial part;organelle envelope lumen;organelle inner membrane;organelle membrane;organelle part	Alzheimer's disease;Cardiac muscle contraction;Huntington's disease;Oxidative phosphorylation;Parkinson's disease	+			CTX_WT	1.96422	0.0352724	0.861097	1.19351	0.172652	0.534539	0.752662	0.258875	-0.326558
28.4528	27.9578	26.263	26.1592	26.4944	26.7643	NaN	NaN	26.8298	NaN	27.821	27.1043	25.9884	NaN	NaN	NaN	NaN	NaN	NaN	NaN	NaN	26.6294	26.967	NaN	0.957876	0.757378	NaN	7	7	39.5	0	9.8131	33									0	1	NaN	0	1	NaN	0.0490149	1	-0.0793843
28.6972	29.1922	28.4942	28.3786	28.03	28.4285	27.8827	28.0104	27.8162	28.0378	28.4402	28.8922	27.8556	27.7822	NaN	27.5885	27.8674	25.9307	NaN	NaN	NaN	28.4036	27.8556	26.8991	0.427847	0.454277	1.36949	7	7	53.7	0	27.186	103	cellular process;establishment of localization;establishment of localization in cell;establishment of protein localization;Golgi vesicle transport;intracellular protein transport;intracellular transport;intra-Golgi vesicle-mediated transport;protein transport;transport;vesicle-mediated transport		cell part;COPI vesicle coat;cytoplasmic part;cytoplasmic vesicle part;Golgi apparatus part;intracellular organelle part;intracellular part;macromolecular complex;membrane coat;membrane part;organelle part;protein complex;vesicle coat		+			CTX_WT	1.76812	0.0260741	1.49015	1.17579	0.0998725	1.15988	0.767304	0.251322	-0.330272
26.722	27.1103	25.4416	25.5983	25.2796	NaN	NaN	NaN	NaN	24.8374	25.5665	NaN	25.0668	25.1102	NaN	NaN	NaN	NaN	NaN	NaN	NaN	25.5983	25.0885	NaN	0.827881	0.305311	NaN	3	3	28.9	0	7.7121	19	ADP metabolic process;alcohol catabolic process;alcohol metabolic process;apoptotic mitochondrial changes;ATP metabolic process;biological regulation;carbohydrate catabolic process;carbohydrate homeostasis;carbohydrate metabolic process;catabolic process;cell proliferation;cell surface receptor linked signaling pathway;cellular carbohydrate catabolic process;cellular carbohydrate metabolic proces…	apoptotic protease activator activity;binding;caspase activator activity;caspase regulator activity;enzyme activator activity;enzyme regulator activity;lipid binding;peptidase activator activity;peptidase regulator activity;phospholipid binding	cell part;cytoplasmic part;cytosol;intracellular membrane-bounded organelle;intracellular organelle;intracellular organelle part;intracellular part;membrane;membrane-bounded organelle;mitochondrial membrane;mitochondrial outer membrane;mitochondrial part;mitochondrion;organelle;organelle membrane;organelle outer membrane;organelle part;outer membrane	Acute myeloid leukemia;Alzheimer's disease;Amyotrophic lateral sclerosis (ALS);Apoptosis;Chronic myeloid leukemia;Colorectal cancer;Endometrial cancer;ErbB signaling pathway;Focal adhesion;Hepatitis C;Insulin signaling pathway;ko05152;Melanoma;Neurotrophin signaling pathway;Non-small cell lung cancer;Pancreatic cancer;Pathways in cancer;Prostate cancer;Toxoplasmosis;VEGF signaling pathway					0	0.9776	NaN	0	0.926279	NaN	1.07284	0.0789116	-0.885128
30.928	30.6684	31.7391	31.78	31.6457	32.069	31.8288	32.1294	31.325	31.1395	30.6458	30.4894	31.1393	31.4141	31.666	30.6944	29.9005	29.8754	30.0375	31.7787	31.1374	31.7595	31.1394	30.0375	0.524528	0.415094	0.8652	15	15	61.9	0	11.066	256	biosynthetic process;cellular biosynthetic process;cellular macromolecule biosynthetic process;cellular macromolecule metabolic process;cellular metabolic process;cellular process;cellular protein metabolic process;macromolecule biosynthetic process;macromolecule metabolic process;metabolic process;primary metabolic process;protein metabolic process;translation	structural constituent of ribosome;structural molecule activity	cell part;cytoplasmic part;cytosolic large ribosomal subunit;intracellular non-membrane-bounded organelle;intracellular organelle;intracellular organelle part;intracellular part;large ribosomal subunit;macromolecular complex;non-membrane-bounded organelle;organelle;organelle part;ribonucleoprotein complex;ribosome	Ribosome	+			CTX_WT	1.73219	0.0411019	1.05264	0.77147	0.340792	0.518287	1.39442	0.0714071	-0.534356
25.0295	NaN	28.2258	28.948	30.6787	30.971	31.1813	30.8722	31.8775	31.6269	30.4587	26.6891	32.3488	32.3942	32.3781	32.6617	32.4184	32.5941	34.2635	33.3832	33.8856	30.6787	32.1131	33.3832	2.24078	1.99005	0.798924	48	1	93.6	0	2.2024	103	actin cytoskeleton organization;actin filament organization;actin filament-based movement;actin filament-based process;actin-mediated cell contraction;actin-myosin filament sliding;actomyosin structure organization;anatomical structure development;anatomical structure formation involved in morphogenesis;anatomical structure morphogenesis;biological regulation;cardiac muscle contraction;cardiac mu…	adenyl nucleotide binding;adenyl ribonucleotide binding;ATP binding;ATPase activity;binding;catalytic activity;hydrolase activity;hydrolase activity, acting on acid anhydrides;hydrolase activity, acting on acid anhydrides, in phosphorus-containing anhydrides;nucleoside-triphosphatase activity;nucleotide binding;purine nucleotide binding;purine ribonucleoside triphosphate binding;purine ribonucleo…	actin cytoskeleton;actin filament;actomyosin, actin part;cell part;cell periphery;contractile fiber;contractile fiber part;cytoplasm;cytoplasmic part;cytoskeletal part;cytoskeleton;extracellular membrane-bounded organelle;extracellular organelle;extracellular region part;extracellular vesicular exosome;I band;intracellular non-membrane-bounded organelle;intracellular organelle;intracellular organ…	Vascular smooth muscle contraction	+			CTX_WT	2.37091	0.00339917	-3.89374	1.23942	0.0660138	-2.00457	0.969755	0.0729506	1.88917
NaN	NaN	NaN	NaN	NaN	NaN	NaN	22.5406	NaN	NaN	NaN	NaN	NaN	NaN	NaN	NaN	NaN	NaN	NaN	NaN	NaN	22.5406	NaN	NaN	NaN	NaN	NaN	1	1	2.6	0.00016736	1.0743	1	biological regulation;defense response;defense response to virus;immune effector process;immune system process;multi-organism process;negative regulation of biological process;negative regulation of biosynthetic process;negative regulation of cell development;negative regulation of cell differentiation;negative regulation of cellular biosynthetic process;negative regulation of cellular macromolec…	acid-amino acid ligase activity;binding;catalytic activity;cation binding;ion binding;ligase activity;ligase activity, forming carbon-nitrogen bonds;metal ion binding;small conjugating protein ligase activity;transition metal ion binding;ubiquitin-protein ligase activity;zinc ion binding	cell part;cytoplasm;intracellular membrane-bounded organelle;intracellular organelle;intracellular part;membrane-bounded organelle;nucleus;organelle						0	1	NaN	-4.34294e-08	1	0	0	1	NaN
NaN	NaN	NaN	NaN	NaN	NaN	NaN	NaN	NaN	NaN	NaN	NaN	NaN	NaN	NaN	25.4174	NaN	NaN	NaN	NaN	NaN	NaN	25.4174	NaN	NaN	NaN	NaN	2	2	1.6	0.0013943	0.68617	6		binding;identical protein binding;protein binding;protein dimerization activity;protein homodimerization activity	cell part;contractile fiber part;cytoplasmic part;intracellular part;M band;organelle part						-4.34294e-08	1	0	0	1	NaN	0	1	NaN
NaN	NaN	25.1189	25.3994	25.9136	24.4326	26.1509	25.8814	NaN	NaN	NaN	NaN	NaN	NaN	25.252	24.8564	NaN	NaN	NaN	NaN	NaN	25.6404	25.0542	NaN	0.637655	0.279759	NaN	9	9	9.6	0	8.595	21	androgen receptor signaling pathway;biological regulation;biosynthetic process;cellular biosynthetic process;cellular macromolecule metabolic process;cellular metabolic process;cellular nitrogen compound metabolic process;cellular process;cellular response to stimulus;developmental process;intracellular receptor mediated signaling pathway;macromolecule metabolic process;metabolic process;negative…	protein binding transcription factor activity;receptor activity;RNA polymerase II transcription cofactor activity;RNA polymerase II transcription factor binding transcription factor activity;transcription coactivator activity;transcription cofactor activity;transcription factor binding transcription factor activity	cell part;intracellular organelle part;intracellular part;macromolecular complex;mediator complex;nuclear part;nucleoplasm part;organelle part;protein complex						0	1	NaN	0	1	NaN	0.386914	0.440466	-0.428576
NaN	NaN	NaN	NaN	NaN	NaN	NaN	24.6523	NaN	NaN	NaN	NaN	NaN	NaN	NaN	NaN	NaN	NaN	NaN	NaN	NaN	24.6523	NaN	NaN	NaN	NaN	NaN	2	2	8.7	0	3.4539	4	alcohol metabolic process;amine biosynthetic process;amine metabolic process;biosynthetic process;cellular amine metabolic process;cellular biogenic amine biosynthetic process;cellular biogenic amine metabolic process;cellular biosynthetic process;cellular lipid metabolic process;cellular metabolic process;cellular nitrogen compound biosynthetic process;cellular nitrogen compound metabolic proces…	catalytic activity;cytidylyltransferase activity;ethanolamine-phosphate cytidylyltransferase activity;nucleotidyltransferase activity;transferase activity;transferase activity, transferring phosphorus-containing groups		Glycerophospholipid metabolism;Phosphonate and phosphinate metabolism					0	1	NaN	-4.34294e-08	1	0	0	1	NaN
NaN	NaN	NaN	NaN	NaN	NaN	NaN	NaN	NaN	NaN	NaN	NaN	NaN	NaN	NaN	NaN	NaN	NaN	NaN	NaN	NaN	NaN	NaN	NaN	NaN	NaN	NaN	2	1	10.7	0	2.8227	6	alcohol metabolic process;carbohydrate metabolic process;cellular carbohydrate metabolic process;cellular component assembly;cellular component organization;cellular component organization or biogenesis;cellular metabolic process;cellular nitrogen compound metabolic process;cellular process;coenzyme metabolic process;cofactor metabolic process;D-xylose metabolic process;glucose metabolic process;…	catalytic activity;L-xylulose reductase (NADP+) activity;oxidoreductase activity;oxidoreductase activity, acting on CH-OH group of donors;oxidoreductase activity, acting on NADH or NADPH;oxidoreductase activity, acting on NADH or NADPH, quinone or similar compound as acceptor;oxidoreductase activity, acting on the CH-OH group of donors, NAD or NADP as acceptor	apical plasma membrane;brush border;cell part;cell projection;cytoplasmic microtubule;cytoplasmic part;cytoskeletal part;intracellular organelle part;intracellular part;macromolecular complex;membrane part;microtubule;microvillus;organelle part;plasma membrane part;protein complex	Pentose and glucuronate interconversions					-4.34294e-08	1	0	-4.34294e-08	1	0	-4.34294e-08	1	0
NaN	NaN	NaN	NaN	23.531	24.2075	NaN	NaN	NaN	NaN	NaN	NaN	NaN	NaN	NaN	NaN	NaN	NaN	NaN	NaN	NaN	23.8693	NaN	NaN	0.47838	NaN	NaN	5	5	6	0	5.4118	7	activation of Ral GTPase activity;activation of Ras GTPase activity;biological regulation;cellular process;cellular response to stimulus;intracellular signal transduction;positive regulation of catalytic activity;positive regulation of GTPase activity;positive regulation of hydrolase activity;positive regulation of molecular function;positive regulation of Ral GTPase activity;positive regulation …	binding;enzyme activator activity;enzyme regulator activity;GTPase activator activity;GTPase regulator activity;nucleoside-triphosphatase regulator activity;protein binding;protein dimerization activity;protein heterodimerization activity;Ral GTPase activator activity;Ras GTPase activator activity;small GTPase regulator activity	cell part;cytoplasmic part;cytosol;intracellular part						0	1	NaN	-4.34294e-08	1	0	0	1	NaN
NaN	NaN	NaN	NaN	NaN	NaN	NaN	NaN	NaN	NaN	NaN	NaN	NaN	NaN	NaN	25.1529	NaN	NaN	NaN	NaN	NaN	NaN	25.1529	NaN	NaN	NaN	NaN	1	1	3.5	0	1.8464	1	cellular macromolecule metabolic process;cellular metabolic process;cellular nitrogen compound metabolic process;cellular process;cellular response to stimulus;cellular response to stress;DNA metabolic process;DNA repair;macromolecule metabolic process;metabolic process;nitrogen compound metabolic process;nucleic acid metabolic process;nucleobase-containing compound metabolic process;primary meta…	binding;DNA binding;nucleic acid binding	cell part;cytoplasm;cytoskeleton;intermediate filament cytoskeleton;intracellular membrane-bounded organelle;intracellular non-membrane-bounded organelle;intracellular organelle;intracellular part;membrane-bounded organelle;non-membrane-bounded organelle;nucleus;organelle						-4.34294e-08	1	0	0	1	NaN	0	1	NaN
NaN	NaN	NaN	NaN	NaN	NaN	25.4297	25.2873	NaN	NaN	NaN	NaN	NaN	NaN	NaN	NaN	NaN	NaN	NaN	NaN	NaN	25.3585	NaN	NaN	0.100699	NaN	NaN	7	5	14.1	0	3.7578	16	biological regulation;cellular process;cellular response to calcium ion;cellular response to chemical stimulus;cellular response to inorganic substance;cellular response to metal ion;cellular response to stimulus;intracellular signal transduction;negative regulation of apoptosis;negative regulation of biological process;negative regulation of cell death;negative regulation of cellular process;neg…	adenyl nucleotide binding;adenyl ribonucleotide binding;ATP binding;binding;calcium ion binding;catalytic activity;cation binding;ion binding;kinase activity;MAP kinase kinase kinase activity;metal ion binding;molecular transducer activity;nucleotide binding;phosphotransferase activity, alcohol group as acceptor;protein kinase activity;protein serine/threonine kinase activity;purine nucleotide bi…	cell part;cytoplasm;cytoplasmic part;cytosol;intracellular membrane-bounded organelle;intracellular organelle;intracellular part;membrane;membrane-bounded organelle;mitochondrion;nucleus;organelle;plasma membrane	Acute myeloid leukemia;Bladder cancer;Chemokine signaling pathway;Chronic myeloid leukemia;Colorectal cancer;Endometrial cancer;ErbB signaling pathway;Focal adhesion;Glioma;Hepatitis C;Insulin signaling pathway;Long-term depression;Long-term potentiation;MAPK signaling pathway;Melanoma;mTOR signaling pathway;Natural killer cell mediated cytotoxicity;Neurotrophin signaling pathway;Non-small cell l…					0	1	NaN	-4.34294e-08	1	0	0	0.893142	NaN
NaN	NaN	NaN	NaN	NaN	NaN	NaN	NaN	NaN	NaN	NaN	NaN	NaN	NaN	NaN	NaN	NaN	27.8838	NaN	NaN	NaN	NaN	NaN	27.8838	NaN	NaN	NaN	1	1	1.5	0.0037136	0.49613	2	anatomical structure development;developmental process;developmental process involved in reproduction;female gonad development;gonad development;male gonad development;organ development;reproductive process;reproductive structure development		anchoring collagen;collagen;collagen type IX;extracellular matrix part;extracellular region part;FACIT collagen	Protein digestion and absorption					0	1	NaN	0	1	NaN	-4.34294e-08	1	0
NaN	NaN	NaN	NaN	NaN	NaN	NaN	NaN	NaN	24.5247	NaN	NaN	NaN	NaN	NaN	NaN	NaN	NaN	NaN	NaN	NaN	NaN	24.5247	NaN	NaN	NaN	NaN	5	4	3.7	0	1.2842	5	biological regulation;regulation of autophagy;regulation of biological process;regulation of catabolic process;regulation of cellular catabolic process;regulation of cellular metabolic process;regulation of cellular process;regulation of metabolic process		extracellular region part;extracellular space						-4.34294e-08	1	0	0	1	NaN	0	1	NaN
NaN	NaN	NaN	NaN	23.253	NaN	NaN	NaN	NaN	NaN	NaN	NaN	NaN	NaN	NaN	NaN	NaN	NaN	NaN	NaN	NaN	23.253	NaN	NaN	NaN	NaN	NaN	2	2	5.4	0	1.5934	4	anatomical structure development;biological regulation;blood vessel development;developmental process;establishment of localization;establishment of localization in cell;establishment of protein localization;intracellular protein transport;intracellular transport;positive regulation of catalytic activity;positive regulation of GTPase activity;positive regulation of hydrolase activity;positive reg…	catalytic activity;enzyme activator activity;enzyme regulator activity;GTPase activator activity;GTPase regulator activity;nucleoside-triphosphatase regulator activity;prenyltransferase activity;protein geranylgeranyltransferase activity;protein prenyltransferase activity;Rab geranylgeranyltransferase activity;transferase activity;transferase activity, transferring alkyl or aryl (other than methy…	cell part;cytoplasmic part;intracellular part;macromolecular complex;protein complex;Rab-protein geranylgeranyltransferase complex						0	1	NaN	-4.34294e-08	1	0	0	1	NaN
NaN	NaN	NaN	24.3506	26.0431	NaN	25.3718	25.549	NaN	NaN	NaN	NaN	NaN	NaN	NaN	NaN	NaN	NaN	NaN	NaN	NaN	25.4604	NaN	NaN	0.711204	NaN	NaN	2	2	10.7	0	2.3445	8	cellular macromolecule metabolic process;cellular metabolic process;cellular nitrogen compound metabolic process;cellular process;macromolecule metabolic process;macromolecule modification;metabolic process;ncRNA metabolic process;ncRNA processing;nitrogen compound metabolic process;nucleic acid metabolic process;nucleobase-containing compound metabolic process;primary metabolic process;pseudouri…	binding;catalytic activity;intramolecular transferase activity;isomerase activity;nucleic acid binding;pseudouridine synthase activity;RNA binding							0	1	NaN	-4.34294e-08	1	0	0	1	NaN
NaN	NaN	NaN	NaN	NaN	NaN	NaN	NaN	NaN	NaN	NaN	NaN	NaN	NaN	23.0021	NaN	NaN	NaN	NaN	NaN	NaN	NaN	23.0021	NaN	NaN	NaN	NaN	1	1	1.3	0.0091664	0.32965	1	biological regulation;regulation of ARF GTPase activity;regulation of biological process;regulation of catabolic process;regulation of catalytic activity;regulation of cellular catabolic process;regulation of cellular metabolic process;regulation of cellular process;regulation of GTP catabolic process;regulation of GTPase activity;regulation of hydrolase activity;regulation of metabolic process;r…	ARF GTPase activator activity;binding;cation binding;enzyme activator activity;enzyme regulator activity;GTPase activator activity;GTPase regulator activity;ion binding;lipid binding;metal ion binding;nucleoside-triphosphatase regulator activity;phospholipid binding;small GTPase regulator activity;transition metal ion binding;zinc ion binding		Endocytosis					-4.34294e-08	1	0	0	1	NaN	0	1	NaN
27.4482	27.9682	NaN	NaN	NaN	NaN	27.5216	27.0531	NaN	NaN	NaN	NaN	NaN	NaN	NaN	NaN	NaN	NaN	NaN	NaN	NaN	27.4849	NaN	NaN	0.375073	NaN	NaN	9	9	4.8	0	6.6979	13	biological regulation;biosynthetic process;cell surface receptor linked signaling pathway;cellular biosynthetic process;cellular macromolecule biosynthetic process;cellular macromolecule metabolic process;cellular metabolic process;cellular nitrogen compound metabolic process;cellular process;cellular response to stimulus;macromolecule biosynthetic process;macromolecule metabolic process;metaboli…	binding;DNA binding;nucleic acid binding;nucleic acid binding transcription factor activity;nucleotide binding;protein binding transcription factor activity;RNA binding;RNA polymerase II transcription factor binding transcription factor activity;RNA polymerase II transcription factor binding transcription factor activity involved in negative regulation of transcription;sequence-specific DNA bindi…	cell part;intracellular membrane-bounded organelle;intracellular organelle;intracellular organelle part;intracellular part;macromolecular complex;membrane-bounded organelle;nuclear part;nucleoplasm part;nucleus;organelle;organelle part;protein complex;transcriptional repressor complex						0	1	NaN	-4.34294e-08	1	0	0	1	NaN
NaN	NaN	NaN	NaN	NaN	NaN	24.5977	24.4025	NaN	NaN	NaN	NaN	NaN	NaN	NaN	NaN	NaN	NaN	NaN	NaN	NaN	24.5001	NaN	NaN	0.138027	NaN	NaN	3	3	4.9	0	6.617	5	cellular component organization;cellular component organization at cellular level;cellular component organization or biogenesis;cellular component organization or biogenesis at cellular level;cellular process;Golgi organization;organelle organization	binding;lipid binding;phospholipid binding	cell part;cytoplasm;intracellular part						0	1	NaN	-4.34294e-08	1	0	0	1	NaN
NaN	NaN	NaN	25.0533	25.6729	24.787	NaN	NaN	NaN	NaN	NaN	NaN	NaN	NaN	NaN	NaN	NaN	NaN	NaN	NaN	NaN	25.0533	NaN	NaN	0.454557	NaN	NaN	3	3	17.6	0	3.4443	9	biological adhesion;biological regulation;cell adhesion;cell-cell adhesion;cellular process;regulation of anatomical structure morphogenesis;regulation of biological process;regulation of biological quality;regulation of cell morphogenesis;regulation of cell shape;regulation of cellular component biogenesis;regulation of cellular component organization;regulation of cellular process;regulation of…	binding;cation binding;cytoskeletal protein binding;filamin binding;ion binding;metal ion binding;protein binding;transition metal ion binding;zinc ion binding	actin filament bundle;actomyosin;adherens junction;anchoring junction;cell cortex;cell junction;cell part;cell-substrate adherens junction;cell-substrate junction;cytoplasmic part;cytoskeletal part;focal adhesion;intracellular membrane-bounded organelle;intracellular organelle;intracellular organelle part;intracellular part;membrane-bounded organelle;organelle;organelle part;stress fiber						0	1	NaN	-4.34294e-08	1	0	0	1	NaN
25.27	26.8695	26.7576	26.2681	27.1214	26.6806	26.9202	27.1314	26.6333	27.0387	NaN	26.7016	26.4049	26.5905	NaN	27.9434	NaN	26.3368	26.2981	27.201	28.0946	26.8136	26.6674	26.7689	0.613415	0.558207	0.850427	5	5	14	0	2.4585	31	biological regulation;cell redox homeostasis;cellular homeostasis;cellular process;cognition;homeostatic process;multicellular organismal process;neurological system process;regulation of biological process;regulation of biological quality;regulation of cellular process;system process	cation transmembrane transporter activity;divalent inorganic cation transmembrane transporter activity;inorganic cation transmembrane transporter activity;ion transmembrane transporter activity;magnesium ion transmembrane transporter activity;metal ion transmembrane transporter activity;substrate-specific transmembrane transporter activity;substrate-specific transporter activity;transmembrane tra…	cell part;cytoplasmic part;endoplasmic reticulum part;integral to membrane;intracellular organelle part;intracellular part;intrinsic to membrane;macromolecular complex;membrane;membrane part;oligosaccharyltransferase complex;organelle part;plasma membrane;protein complex						0.374567	0.906715	-0.355265	0.08046	1	-0.0972287	0.36191	0.515288	0.258036
26.0716	26.4275	28.5653	28.8769	28.2567	28.4066	29.8433	29.3541	28.8084	28.6529	28.4678	27.9235	28.8892	28.9065	29.0979	29.2377	28.1898	28.1553	NaN	25.5587	NaN	28.4859	28.8488	28.1553	1.32754	0.410292	1.50919	23	23	22.9	0	26.819	173	biological regulation;cell surface receptor linked signaling pathway;cellular process;cellular response to stimulus;enzyme linked receptor protein signaling pathway;establishment of localization;establishment of localization in cell;establishment of protein localization;intracellular protein transport;intracellular transport;negative regulation of actin filament bundle assembly;negative regulatio…	ARF GTPase activator activity;binding;cation binding;DNA binding;enzyme activator activity;enzyme regulator activity;GTPase activator activity;GTPase regulator activity;ion binding;lipid binding;metal ion binding;nucleic acid binding;nucleic acid binding transcription factor activity;nucleoside-triphosphatase regulator activity;phosphatidylinositol binding;phosphatidylinositol-3,4,5-trisphosphate…	cell part;cytoplasmic part;Golgi apparatus;Golgi apparatus part;Golgi cisterna membrane;Golgi membrane;intracellular;intracellular membrane-bounded organelle;intracellular organelle;intracellular organelle part;intracellular part;membrane;membrane-bounded organelle;organelle;organelle membrane;organelle part;plasma membrane	Endocytosis		+		MDX_WT	0.461945	0.648701	0.923952	1.59656	0.0355206	1.44671	0.515289	0.320574	0.522758
30.7605	30.961	30.8122	30.512	29.8877	30.3872	29.2978	29.9283	30.4593	30.2816	31.4462	31.5959	29.9932	30.0819	28.6234	27.6337	29.8041	29.778	28.1999	27.2422	27.1796	30.4496	30.1818	28.1999	0.569939	1.33248	1.29731	6	6	3.5	0	14.265	130	anatomical structure development;anatomical structure morphogenesis;biological regulation;biosynthetic process;cardiac chamber development;cardiac ventricle development;cellular biosynthetic process;cellular macromolecule biosynthetic process;cellular macromolecule metabolic process;cellular metabolic process;cellular nitrogen compound metabolic process;cellular process;developmental growth;devel…	binding;DNA binding;nucleic acid binding;protein binding;protein binding transcription factor activity;TBP-class protein binding;transcription coactivator activity;transcription cofactor activity;transcription factor binding;transcription factor binding transcription factor activity	cell part;cytoplasm;intracellular membrane-bounded organelle;intracellular organelle;intracellular part;membrane-bounded organelle;nucleus;organelle		+			CTX_WT	2.4102	0.00544906	1.87758	1.21836	0.0773021	1.57364	0.249854	0.616247	-0.303931
28.8568	29.1539	27.682	28.5361	28.1767	28.0996	28.3136	28.56	28.3765	28.389	27.2915	27.5045	28.4481	28.3155	28.3685	28.2084	27.5734	28.2549	26.1951	27.0689	27.4171	28.4248	28.342	27.4171	0.459847	0.450144	0.754073	31	30	33.5	0	50.718	171		binding;lipid binding;phospholipid binding	cell part;cytoplasm;cytoskeleton;intracellular non-membrane-bounded organelle;intracellular organelle;intracellular part;non-membrane-bounded organelle;organelle		+			CTX_WT	2.1994	0.0163316	1.12047	1.49529	0.070322	0.810886	0.709731	0.284392	-0.309579
NaN	NaN	NaN	NaN	NaN	NaN	25.4168	26.2694	NaN	25.8191	NaN	NaN	NaN	25.3762	27.1131	29.0837	27.2981	27.2106	28.2019	29.8326	30.1039	25.8431	26.4661	28.2019	0.602873	1.66264	1.37296	5	5	33.7	0	16.616	40	biological regulation;calcium ion homeostasis;cation homeostasis;cellular calcium ion homeostasis;cellular cation homeostasis;cellular chemical homeostasis;cellular divalent inorganic cation homeostasis;cellular homeostasis;cellular ion homeostasis;cellular metal ion homeostasis;cellular process;chemical homeostasis;divalent inorganic cation homeostasis;homeostatic process;ion homeostasis;metal i…	transporter activity	cell part;clathrin-coated vesicle;coated vesicle;cytoplasmic membrane-bounded vesicle;cytoplasmic part;cytoplasmic vesicle;integral to membrane;intracellular membrane-bounded organelle;intracellular organelle;intracellular part;intrinsic to membrane;membrane part;membrane-bounded organelle;membrane-bounded vesicle;organelle;synapse part;synaptic vesicle;vesicle						1.29214	0.0598499	-2.68628	0.855308	0.183402	-1.68138	0.323884	0.457792	1.00489
26.9084	27.373	30.4464	30.2639	29.9323	30.2155	29.4389	30.2218	30.9281	30.7913	30.8546	30.5493	30.64	31.0958	29.9334	30.2538	30.7084	30.0682	30.0679	27.9774	28.7073	30.0739	30.7156	30.0679	1.40221	0.380923	1.12386	9	4	64.4	0	11.238	117	anatomical structure development;biological regulation;brain development;cell surface receptor linked signaling pathway;cellular process;cellular response to stimulus;developmental process;enzyme linked receptor protein signaling pathway;epidermal growth factor receptor signaling pathway;establishment of localization;establishment of protein localization;intracellular signal transduction;organ de…	binding;GTP binding;guanyl nucleotide binding;guanyl ribonucleotide binding;nucleotide binding;purine nucleotide binding;purine ribonucleoside triphosphate binding;purine ribonucleotide binding;ribonucleotide binding	cell part;cytoplasm;cytoplasmic part;Golgi apparatus;intracellular membrane-bounded organelle;intracellular organelle;intracellular part;membrane;membrane-bounded organelle;organelle;plasma membrane			+	+	MDX_CTX;MDX_WT	0.0766051	1	-0.155807	1.6515	0.0399324	1.12497	1.58826	0.0221643	1.28078
NaN	NaN	NaN	NaN	23.0605	NaN	NaN	NaN	NaN	NaN	NaN	NaN	NaN	NaN	NaN	NaN	NaN	NaN	NaN	NaN	NaN	23.0605	NaN	NaN	NaN	NaN	NaN	1	1	1.5	0.00016252	0.91294	1	anatomical structure formation involved in morphogenesis;axoneme assembly;cell projection assembly;cell projection organization;cellular component assembly;cellular component assembly at cellular level;cellular component assembly involved in morphogenesis;cellular component movement;cellular component organization;cellular component organization at cellular level;cellular component organization o…	alpha-tubulin binding;binding;cytoskeletal protein binding;gamma-tubulin binding;protein binding;tubulin binding	cell part;cell projection;cell projection part;centriole;centrosome;cilium;cytoplasmic part;cytoskeletal part;intracellular membrane-bounded organelle;intracellular non-membrane-bounded organelle;intracellular organelle;intracellular organelle part;intracellular part;membrane-bounded organelle;microtubule basal body;microtubule organizing center;microtubule organizing center part;non-membrane-bou…						0	1	NaN	-4.34294e-08	1	0	0	1	NaN
27.3608	26.9115	27.355	27.2124	27.2795	26.9238	28.2508	27.55	28.0707	27.9296	26.7929	27.0779	28.0212	27.6667	28.7735	29.401	28.2859	28.6127	28.8266	29.3348	28.8153	27.3172	27.9754	28.8153	0.422454	0.843555	0.381816	19	19	27.2	0	18.965	106	acylglycerol metabolic process;alcohol metabolic process;amine metabolic process;behavior;betaine metabolic process;biological regulation;carbohydrate metabolic process;carboxylic acid catabolic process;carboxylic acid metabolic process;carnitine metabolic process;catabolic process;cellular amine metabolic process;cellular amino acid metabolic process;cellular carbohydrate metabolic process;cellu…	carnitine O-acyltransferase activity;carnitine O-palmitoyltransferase activity;catalytic activity;O-acyltransferase activity;O-palmitoyltransferase activity;palmitoyltransferase activity;transferase activity;transferase activity, transferring acyl groups;transferase activity, transferring acyl groups other than amino-acyl groups	cell part;cytoplasmic part;integral to membrane;integral to mitochondrial membrane;integral to mitochondrial outer membrane;integral to organelle membrane;intracellular organelle part;intracellular part;intrinsic to membrane;intrinsic to mitochondrial outer membrane;intrinsic to organelle membrane;membrane;membrane part;mitochondrial inner membrane;mitochondrial membrane;mitochondrial membrane pa…	Adipocytokine signaling pathway;Fatty acid metabolism;PPAR signaling pathway	+			CTX_WT	4.11203	0.000431193	-1.41957	1.14526	0.137909	-0.808364	1.05434	0.107662	0.61121
NaN	NaN	NaN	NaN	NaN	NaN	23.8314	NaN	NaN	NaN	NaN	NaN	NaN	NaN	NaN	NaN	NaN	NaN	NaN	NaN	NaN	23.8314	NaN	NaN	NaN	NaN	NaN	1	1	7.1	0	3.5621	6		active transmembrane transporter activity;carbohydrate transmembrane transporter activity;cation transmembrane transporter activity;cation:sugar symporter activity;ion transmembrane transporter activity;nucleotide-sugar transmembrane transporter activity;pyrimidine nucleotide sugar transmembrane transporter activity;secondary active transmembrane transporter activity;solute:cation symporter activ…	cell part;cytoplasmic part;Golgi apparatus part;Golgi membrane;integral to membrane;intracellular membrane-bounded organelle;intracellular organelle;intracellular organelle part;intracellular part;intrinsic to membrane;membrane;membrane part;membrane-bounded organelle;nucleus;organelle;organelle membrane;organelle part						0	1	NaN	-4.34294e-08	1	0	0	1	NaN
25.5824	25.1894	25.2995	NaN	NaN	NaN	NaN	NaN	NaN	NaN	NaN	NaN	NaN	NaN	NaN	NaN	NaN	NaN	NaN	NaN	NaN	25.2995	NaN	NaN	0.202757	NaN	NaN	4	3	11.4	0	3.5938	7	anatomical structure development;biological regulation;biosynthetic process;bone remodeling;camera-type eye development;cell differentiation;cell fate commitment;cell surface receptor linked signaling pathway;cellular biosynthetic process;cellular component assembly;cellular component organization;cellular component organization or biogenesis;cellular developmental process;cellular macromolecule …	binding;chromatin binding;DNA binding;nucleic acid binding;nucleic acid binding transcription factor activity;regulatory region DNA binding;regulatory region nucleic acid binding;RNA polymerase II core promoter proximal region sequence-specific DNA binding transcription factor activity;RNA polymerase II core promoter proximal region sequence-specific DNA binding transcription factor activity invo…	cell part;cytoplasm;intracellular membrane-bounded organelle;intracellular organelle;intracellular organelle part;intracellular part;macromolecular complex;membrane-bounded organelle;nuclear part;nucleoplasm part;nucleus;organelle;organelle part;protein complex;transcription factor complex	Melanogenesis;Melanoma;Osteoclast differentiation;Pathways in cancer					0	1	NaN	-4.34294e-08	1	0	0	1	NaN
28.7846	27.8063	28.5393	29.1922	28.2462	28.3348	28.6858	28.1313	28.7023	28.8086	27.2041	27.8397	27.5903	27.5242	27.6482	27.7396	27.4361	27.3975	27.305	27.2827	NaN	28.4371	27.6939	27.3512	0.430178	0.570805	0.0732926	8	8	33.5	0	30.159	82		enzyme inhibitor activity;enzyme regulator activity;phosphatase inhibitor activity;phosphatase regulator activity	cell part;cytoplasmic membrane-bounded vesicle;cytoplasmic part;cytoplasmic vesicle;intracellular membrane-bounded organelle;intracellular organelle;intracellular part;membrane-bounded organelle;membrane-bounded vesicle;nucleus;organelle;vesicle		+			CTX_WT	3.27246	0.00277326	1.10977	0.987713	0.235022	0.526829	1.43334	0.0611352	-0.582945
26.883	26.2875	26.7265	26.3443	26.8271	26.2811	28.4948	26.8515	27.381	26.6216	27.4126	26.6907	26.8423	26.8901	25.815	26.025	NaN	NaN	NaN	NaN	NaN	26.7768	26.7665	NaN	0.718796	0.569729	NaN	22	20	13	0	16.384	62	biological regulation;cellular process;cellular response to stimulus;intracellular signal transduction;regulation of biological process;regulation of cellular process;response to stimulus;signal transduction;small GTPase mediated signal transduction	binding;enzyme regulator activity;GTPase regulator activity;guanyl-nucleotide exchange factor activity;lipid binding;nucleoside-triphosphatase regulator activity;phospholipid binding;Ras guanyl-nucleotide exchange factor activity;Rho guanyl-nucleotide exchange factor activity;small GTPase regulator activity							0	1	NaN	0	1	NaN	0.154418	0.803325	-0.127199
NaN	NaN	NaN	NaN	NaN	NaN	NaN	24.1478	NaN	NaN	NaN	NaN	NaN	NaN	NaN	NaN	NaN	NaN	NaN	NaN	NaN	24.1478	NaN	NaN	NaN	NaN	NaN	1	1	7.9	0	3.6958	2	biological regulation;positive regulation of ATPase activity;positive regulation of catalytic activity;positive regulation of hydrolase activity;positive regulation of molecular function;regulation of ATPase activity;regulation of biological process;regulation of catabolic process;regulation of catalytic activity;regulation of cellular catabolic process;regulation of cellular metabolic process;re…	ATPase activator activity;ATPase regulator activity;enzyme activator activity;enzyme regulator activity;nucleoside-triphosphatase regulator activity							0	1	NaN	-4.34294e-08	1	0	0	1	NaN
30.3578	30.5287	30.2642	29.9187	30.6818	30.1316	29.975	30.2245	27.4236	27.3265	26.2125	27.4097	27.4075	27.7175	27.4774	27.0409	NaN	27.1943	27.5611	27.4043	27.8507	30.2443	27.4086	27.4827	0.26053	0.459297	0.276473	46	46	41.5	0	88.587	179	cell cycle process;cell division;cellular component organization;cellular component organization at cellular level;cellular component organization or biogenesis;cellular component organization or biogenesis at cellular level;cellular macromolecular complex subunit organization;cellular macromolecule metabolic process;cellular metabolic process;cellular nitrogen compound metabolic process;cellular…	adenyl nucleotide binding;adenyl ribonucleotide binding;ATP binding;binding;nucleotide binding;purine nucleotide binding;purine ribonucleoside triphosphate binding;purine ribonucleotide binding;ribonucleotide binding	cell part;chromosomal part;chromosome;condensed chromosome;condensin complex;cytoplasm;intracellular non-membrane-bounded organelle;intracellular organelle;intracellular organelle part;intracellular part;macromolecular complex;non-membrane-bounded organelle;nuclear chromosome;nuclear part;organelle;organelle part;protein complex	Cell cycle - yeast	+		+	CTX_WT;MDX_CTX	7.97292	0	2.75767	0.462153	0.713986	-0.250675	9.70652	0	-3.00835
NaN	NaN	NaN	NaN	NaN	NaN	NaN	NaN	NaN	NaN	NaN	23.5592	NaN	NaN	NaN	NaN	NaN	NaN	NaN	NaN	NaN	NaN	23.5592	NaN	NaN	NaN	NaN	3	2	7.5	0.0018374	0.63007	4	cellular component organization;cellular component organization or biogenesis;cellular membrane organization;cellular process;endocytosis;establishment of localization;membrane invagination;membrane organization;receptor-mediated endocytosis;transport;vesicle-mediated transport	binding;calcium ion binding;cation binding;ion binding;metal ion binding	cell part;cytoplasm;intracellular part						-4.34294e-08	1	0	0	1	NaN	0	1	NaN
NaN	NaN	NaN	NaN	NaN	NaN	27.0402	26.5983	NaN	NaN	NaN	NaN	NaN	NaN	NaN	NaN	NaN	NaN	NaN	NaN	NaN	26.8193	NaN	NaN	0.312449	NaN	NaN	2	2	6.5	0.00016526	1.002	5	biological regulation;biosynthetic process;cell cycle;cellular biosynthetic process;cellular macromolecule biosynthetic process;cellular macromolecule metabolic process;cellular metabolic process;cellular nitrogen compound metabolic process;cellular process;macromolecule biosynthetic process;macromolecule metabolic process;metabolic process;nitrogen compound metabolic process;nucleic acid metabol…	binding;protein binding;protein dimerization activity;protein heterodimerization activity	cell part;cytoplasmic part;cytosol;intracellular organelle part;intracellular part;membrane;nuclear membrane;nuclear part;organelle membrane;organelle part						0	1	NaN	-4.34294e-08	1	0	0	1	NaN
29.2679	29.2182	29.7591	29.7141	29.8496	29.5282	30.4242	30.1216	30.1757	29.8645	29.929	29.3774	30.4277	30.3912	30.7479	30.6893	30.3456	30.457	30.5527	31.1699	30.9518	29.7366	30.2834	30.5527	0.408256	0.461561	0.350157	33	33	49.6	0	48.89	364			cell part;integral to membrane;intrinsic to membrane;membrane;membrane part;plasma membrane		+			CTX_WT	2.92905	0.00627527	-0.960017	1.1842	0.186352	-0.495056	1.29248	0.0949032	0.464962
27.6865	26.9275	26.9597	27.0706	27.8724	27.6416	27.2867	27.6339	27.3932	27.7591	27.0213	27.1295	28.0594	28.061	26.8882	27.0689	28.2896	28.2645	28.4017	NaN	27.7104	27.4603	27.2613	28.2771	0.369366	0.475806	0.309891	19	19	36.3	0	19.784	75		binding;catalytic activity;DNA binding;nucleic acid binding;oxidoreductase activity;oxidoreductase activity, acting on the CH-CH group of donors;oxidoreductase activity, acting on the CH-CH group of donors, NAD or NADP as acceptor	cell part;cytoplasmic part;integral to membrane;intracellular membrane-bounded organelle;intracellular organelle;intracellular organelle part;intracellular part;intrinsic to membrane;membrane;membrane part;membrane-bounded organelle;mitochondrion;nuclear inner membrane;nuclear lamina;nuclear membrane;nuclear part;organelle;organelle inner membrane;organelle membrane;organelle part		+			CTX_WT	2.32921	0.0222852	-0.781696	1.73158	0.0535642	-0.744031	0.0644181	0.999301	0.0376654
NaN	NaN	NaN	NaN	NaN	NaN	NaN	NaN	NaN	NaN	NaN	NaN	NaN	NaN	NaN	22.9873	NaN	NaN	NaN	NaN	NaN	NaN	22.9873	NaN	NaN	NaN	NaN	1	1	2.4	0.0091442	0.31783	2	biosynthetic process;cellular biosynthetic process;cellular lipid metabolic process;cellular macromolecule metabolic process;cellular metabolic process;cellular process;cellular protein metabolic process;glycerolipid biosynthetic process;glycerolipid metabolic process;glycerophospholipid biosynthetic process;glycerophospholipid metabolic process;GPI anchor biosynthetic process;GPI anchor metaboli…	catalytic activity;phosphotransferase activity, for other substituted phosphate groups;transferase activity;transferase activity, transferring phosphorus-containing groups	cell part;cytoplasmic part;endoplasmic reticulum membrane;endoplasmic reticulum part;integral to membrane;intracellular organelle part;intracellular part;intrinsic to membrane;membrane;membrane part;organelle membrane;organelle part	Glycosylphosphatidylinositol(GPI)-anchor biosynthesis					-4.34294e-08	1	0	0	1	NaN	0	1	NaN
NaN	NaN	NaN	NaN	25.8342	26.1227	NaN	NaN	NaN	NaN	NaN	NaN	NaN	NaN	NaN	NaN	NaN	NaN	NaN	NaN	NaN	25.9785	NaN	NaN	0.204014	NaN	NaN	1	1	4.8	0	2.5726	2			cell part;cytoplasmic part;intracellular membrane-bounded organelle;intracellular organelle;intracellular part;membrane-bounded organelle;mitochondrion;organelle						0	1	NaN	-4.34294e-08	1	0	0	1	NaN
NaN	NaN	24.7124	25.3334	24.6892	24.55	24.9298	24.9882	NaN	NaN	NaN	NaN	NaN	NaN	NaN	NaN	NaN	NaN	NaN	NaN	NaN	24.8211	NaN	NaN	0.280056	NaN	NaN	6	6	4.7	0	5.3059	10	alcohol biosynthetic process;alcohol metabolic process;alpha-beta T cell activation;alpha-beta T cell activation involved in immune response;alpha-beta T cell differentiation;alpha-beta T cell differentiation involved in immune response;amine biosynthetic process;amine metabolic process;anatomical structure development;anatomical structure morphogenesis;apoptotic mitochondrial changes;aromatic am…	active transmembrane transporter activity;adenyl nucleotide binding;adenyl ribonucleotide binding;ATP binding;ATPase activity;ATPase activity, coupled;ATPase activity, coupled to movement of substances;ATPase activity, coupled to transmembrane movement of ions;ATPase activity, coupled to transmembrane movement of ions, phosphorylative mechanism;ATPase activity, coupled to transmembrane movement o…	basolateral plasma membrane;brush border membrane;cell body;cell part;cell projection;cell projection membrane;cell projection part;clathrin-coated vesicle;coated vesicle;cytoplasmic membrane-bounded vesicle;cytoplasmic part;cytoplasmic vesicle;endosome;Golgi apparatus;Golgi apparatus part;Golgi-associated vesicle;integral to membrane;intracellular membrane-bounded organelle;intracellular organel…						0	1	NaN	-4.34294e-08	1	0	0	1	NaN
NaN	24.4323	NaN	NaN	NaN	NaN	24.2255	NaN	NaN	NaN	NaN	NaN	NaN	NaN	NaN	NaN	NaN	NaN	NaN	NaN	NaN	24.3289	NaN	NaN	0.146272	NaN	NaN	5	5	2.6	0.00016284	0.92301	10	anatomical structure development;anatomical structure formation involved in morphogenesis;androgen receptor signaling pathway;axis elongation;axis elongation involved in somitogenesis;biological regulation;biosynthetic process;canonical Wnt receptor signaling pathway;cell surface receptor linked signaling pathway;cellular biosynthetic process;cellular macromolecule metabolic process;cellular meta…	binding;chromatin binding;protein binding transcription factor activity;receptor activity;RNA polymerase II transcription cofactor activity;RNA polymerase II transcription factor binding transcription factor activity;transcription coactivator activity;transcription cofactor activity;transcription factor binding transcription factor activity	cell part;intracellular organelle part;intracellular part;macromolecular complex;mediator complex;nuclear part;nucleoplasm part;organelle part;protein complex						0	1	NaN	-4.34294e-08	1	0	0	1	NaN
NaN	NaN	NaN	NaN	NaN	NaN	NaN	NaN	NaN	NaN	NaN	NaN	NaN	NaN	NaN	NaN	NaN	NaN	NaN	NaN	24.9666	NaN	NaN	24.9666	NaN	NaN	NaN	6	1	5	0	3.8617	1	cation transport;cellular hypotonic response;cellular hypotonic salinity response;cellular process;cellular response to abiotic stimulus;cellular response to osmotic stress;cellular response to salt stress;cellular response to stimulus;cellular response to stress;establishment of localization;hypotonic response;hypotonic salinity response;ion transport;metal ion transport;monovalent inorganic cat…	active transmembrane transporter activity;anion transmembrane transporter activity;anion:cation symporter activity;cation transmembrane transporter activity;cation:chloride symporter activity;chloride transmembrane transporter activity;inorganic anion transmembrane transporter activity;ion transmembrane transporter activity;potassium:chloride symporter activity;secondary active transmembrane tran…	basolateral plasma membrane;cell part;integral to membrane;intrinsic to membrane;membrane part;plasma membrane part						0	1	NaN	0	1	NaN	-4.34294e-08	1	0
25.2318	25.622	NaN	NaN	NaN	NaN	NaN	NaN	NaN	NaN	NaN	24.7605	NaN	NaN	NaN	NaN	NaN	NaN	NaN	NaN	NaN	25.4269	24.7605	NaN	0.275891	NaN	NaN	4	4	21.3	0	4.3545	9	apoptosis;biological regulation;cell death;cellular process;death;negative regulation of apoptosis;negative regulation of biological process;negative regulation of cell death;negative regulation of cellular process;negative regulation of programmed cell death;programmed cell death;regulation of apoptosis;regulation of biological process;regulation of cell death;regulation of cellular process;regu…		cell part;endomembrane system;intracellular;membrane						0	1	NaN	0	1	NaN	0	1	-0.666474
NaN	NaN	25.0895	24.6159	NaN	24.4156	NaN	NaN	NaN	NaN	NaN	NaN	25.0272	NaN	NaN	NaN	NaN	NaN	NaN	NaN	NaN	24.6159	25.0272	NaN	0.346049	NaN	NaN	2	2	12.7	0	2.3958	11			cell part;integral to membrane;intrinsic to membrane;membrane part						0	1	NaN	0	1	NaN	0	1	0.320194
30.7645	30.7557	28.5537	28.4072	27.7513	28.776	28.3384	28.2525	28.0621	27.2594	29.4127	29.7454	27.5365	27.3404	NaN	NaN	27.5492	27.3168	26.3397	NaN	NaN	28.4805	27.7993	27.3168	1.15464	1.08975	0.641836	11	11	59.1	0	19.997	69					+			CTX_WT	1.55289	0.0374815	1.88133	0.854665	0.204348	1.1575	0.588771	0.246337	-0.723828
29.6683	29.6509	29.4173	29.5181	29.6926	29.4829	29.642	30.0766	28.8084	29.1406	28.6554	28.6908	29.0226	29.088	30.1132	29.922	28.6354	28.3233	27.9342	29.6112	29.3912	29.6465	29.0553	28.6354	0.201198	0.548878	0.708752	41	32	37.8	0	81.558	278	anatomical structure development;biological regulation;biosynthetic process;cellular biosynthetic process;cellular component disassembly;cellular component disassembly at cellular level;cellular component organization;cellular component organization at cellular level;cellular component organization or biogenesis;cellular component organization or biogenesis at cellular level;cellular macromolecul…	binding;chromatin binding;DNA binding;nucleic acid binding	cell part;chromatin remodeling complex;intracellular membrane-bounded organelle;intracellular organelle;intracellular organelle part;intracellular part;macromolecular complex;membrane-bounded organelle;nBAF complex;npBAF complex;nuclear part;nucleoplasm part;nucleus;organelle;organelle part;protein complex;SWI/SNF complex;SWI/SNF-type complex;transcriptional repressor complex		+			CTX_WT	2.1669	0.0245489	0.864557	0.561289	0.535379	0.401074	1.38048	0.084457	-0.463482
NaN	NaN	NaN	NaN	NaN	NaN	25.0194	25.4659	NaN	NaN	NaN	NaN	NaN	NaN	NaN	NaN	NaN	NaN	NaN	NaN	NaN	25.2426	NaN	NaN	0.315702	NaN	NaN	8	7	9.8	0	8.6058	15	anterograde axon cargo transport;axon cargo transport;cell communication;cell-cell signaling;cellular component movement;cellular process;cytoskeleton-dependent intracellular transport;developmental process;embryo development;establishment of localization;establishment of localization in cell;establishment of mitochondrion localization;establishment of mitochondrion localization, microtubule-medi…	adenyl nucleotide binding;adenyl ribonucleotide binding;ATP binding;ATPase activity;binding;catalytic activity;cytoskeletal protein binding;hydrolase activity;hydrolase activity, acting on acid anhydrides;hydrolase activity, acting on acid anhydrides, in phosphorus-containing anhydrides;lipid binding;microtubule binding;microtubule motor activity;motor activity;nucleoside-triphosphatase activity;…	cell body;cell part;cell projection;cytoplasm;cytoplasmic part;cytoplasmic vesicle membrane;cytoplasmic vesicle part;cytoskeletal part;intracellular membrane-bounded organelle;intracellular organelle;intracellular organelle part;intracellular part;macromolecular complex;membrane;membrane-bounded organelle;microtubule;microtubule associated complex;mitochondrion;neuron projection;neuronal cell bod…						0	1	NaN	-4.34294e-08	1	0	0	1	NaN
26.2536	26.7761	25.199	26.8473	26.9835	27.4269	27.5856	27.5818	27.2242	27.9706	26.4988	26.4235	26.9403	27.2105	28.2855	28.9918	27.358	27.6183	28.3953	29.1082	28.3892	26.9154	27.2173	28.3892	0.802808	0.900222	0.696916	12	12	26.6	0	11.083	75	amine catabolic process;amine metabolic process;branched chain family amino acid catabolic process;branched chain family amino acid metabolic process;carboxylic acid catabolic process;carboxylic acid metabolic process;catabolic process;cellular amine metabolic process;cellular amino acid catabolic process;cellular amino acid metabolic process;cellular catabolic process;cellular ketone metabolic p…	adenyl nucleotide binding;adenyl ribonucleotide binding;ATP binding;binding;catalytic activity;CoA carboxylase activity;ligase activity;ligase activity, forming carbon-carbon bonds;methylcrotonoyl-CoA carboxylase activity;nucleotide binding;purine nucleotide binding;purine ribonucleoside triphosphate binding;purine ribonucleotide binding;ribonucleotide binding	cell part;cytoplasmic part;intracellular membrane-bounded organelle;intracellular organelle;intracellular organelle lumen;intracellular organelle part;intracellular part;membrane-bounded organelle;membrane-enclosed lumen;mitochondrial matrix;mitochondrial part;mitochondrion;organelle;organelle lumen;organelle part	Valine, leucine and isoleucine degradation	+			CTX_WT	1.97482	0.0198596	-1.34208	0.818908	0.266102	-0.730653	0.760446	0.184477	0.611424
NaN	NaN	NaN	NaN	NaN	23.8416	NaN	NaN	NaN	NaN	NaN	NaN	NaN	NaN	NaN	NaN	NaN	NaN	NaN	NaN	NaN	23.8416	NaN	NaN	NaN	NaN	NaN	2	2	3.4	0.0087681	0.34593	4	activation of protein kinase activity;activation of protein kinase C activity by G-protein coupled receptor protein signaling pathway;biological regulation;cell cycle checkpoint;cell surface receptor linked signaling pathway;cellular process;cellular response to stimulus;cellular response to stress;DNA damage checkpoint;DNA integrity checkpoint;G1/S transition checkpoint;G-protein coupled recepto…	adenyl nucleotide binding;adenyl ribonucleotide binding;ATP binding;binding;catalytic activity;cation binding;diacylglycerol kinase activity;enzyme inhibitor activity;enzyme regulator activity;ion binding;kinase activity;lipid kinase activity;metal ion binding;nucleotide binding;phosphotransferase activity, alcohol group as acceptor;purine nucleotide binding;purine ribonucleoside triphosphate bin…	cell part;cell projection;cytoplasm;intracellular membrane-bounded organelle;intracellular organelle;intracellular part;lamellipodium;membrane;membrane-bounded organelle;nucleus;organelle;plasma membrane	Glycerolipid metabolism;Glycerophospholipid metabolism;Phosphatidylinositol signaling system					0	1	NaN	-4.34294e-08	1	0	0	1	NaN
33.3998	33.3047	31.7247	31.4389	32.2117	32.3452	31.0658	30.9491	31.4407	31.4365	33.0864	33.3521	31.31	31.4216	30.6303	29.9201	33.2389	33.2946	31.6879	27.9824	29.507	31.9682	31.4291	31.6879	0.938783	1.1467	2.34441	16	15	91.9	0	67.778	293	biological regulation;regulation of biological process;regulation of cell division;regulation of cellular process;regulation of cytokinesis;response to amine stimulus;response to amphetamine;response to calcium ion;response to chemical stimulus;response to corticosteroid stimulus;response to corticosterone stimulus;response to endogenous stimulus;response to glucocorticoid stimulus;response to ho…	binding;calcium ion binding;cation binding;ion binding;metal ion binding	cell part;centrosome;cytoplasmic part;cytoskeletal part;cytosol;intracellular non-membrane-bounded organelle;intracellular organelle;intracellular organelle part;intracellular part;macromolecular complex;microtubule;microtubule organizing center;non-membrane-bounded organelle;organelle;organelle part;protein complex;spindle microtubule;spindle pole	Alzheimer's disease;Calcium signaling pathway;Gastric acid secretion;Glioma;GnRH signaling pathway;Insulin signaling pathway;ko05152;Long-term potentiation;Melanogenesis;Neurotrophin signaling pathway;Olfactory transduction;Oocyte meiosis;Phosphatidylinositol signaling system;Phototransduction;Phototransduction - fly;Plant-pathogen interaction;Salivary secretion;Vascular smooth muscle contraction					0.47056	0.637056	0.912821	0.179768	1	0.432531	0.426153	0.395554	-0.48029
26.8729	26.0068	25.7372	25.683	25.9969	25.7024	25.852	26.0535	25.4	NaN	NaN	25.6849	25.5886	25.7882	25.3958	25.8376	NaN	NaN	NaN	NaN	NaN	25.9244	25.6367	NaN	0.386142	0.189412	NaN	10	10	12.5	0	13.517	30	biological regulation;catabolic process;cell cycle;cell cycle cytokinesis;cell cycle process;cellular catabolic process;cellular component organization;cellular component organization at cellular level;cellular component organization or biogenesis;cellular component organization or biogenesis at cellular level;cellular macromolecule catabolic process;cellular macromolecule metabolic process;cellu…	catalytic activity;cysteine-type peptidase activity;hydrolase activity;hydrolase activity, acting on ester bonds;peptidase activity;peptidase activity, acting on L-amino acid peptides;small conjugating protein-specific protease activity;thiolester hydrolase activity;ubiquitin thiolesterase activity;ubiquitin-specific protease activity	cell part;cytoplasmic part;cytosol;early endosome;endosomal part;endosome;extrinsic to endosome membrane;extrinsic to membrane;extrinsic to organelle membrane;extrinsic to plasma membrane;intracellular;intracellular membrane-bounded organelle;intracellular organelle;intracellular organelle part;intracellular part;membrane;membrane part;membrane-bounded organelle;midbody;nucleus;organelle;organell…	Endocytosis					0	1	NaN	0	1	NaN	1.28554	0.121449	-0.372233
NaN	NaN	23.9921	NaN	23.6492	NaN	NaN	NaN	NaN	NaN	NaN	NaN	NaN	NaN	NaN	NaN	NaN	NaN	NaN	NaN	NaN	23.8206	NaN	NaN	0.242418	NaN	NaN	3	3	2.6	0	2.5607	7	actin cytoskeleton organization;actin filament-based process;actomyosin structure organization;biological adhesion;calcium-dependent cell-matrix adhesion;cell adhesion;cell-matrix adhesion;cell-substrate adhesion;cellular component organization;cellular component organization at cellular level;cellular component organization or biogenesis;cellular component organization or biogenesis at cellular …	actin binding;adenyl nucleotide binding;adenyl ribonucleotide binding;ATP binding;binding;calcium channel activity;catalytic activity;cation binding;cation channel activity;cation transmembrane transporter activity;channel activity;cytoskeletal protein binding;ion binding;ion channel activity;ion transmembrane transporter activity;kinase activity;metal ion binding;myosin binding;nucleotide bindin…	cell part;cell projection;integral to membrane;intrinsic to membrane;membrane;membrane part;plasma membrane;ruffle	Mineral absorption					0	1	NaN	-4.34294e-08	1	0	0	1	NaN
26.128	25.9444	25.7249	26.244	25.5817	26.0088	NaN	NaN	NaN	NaN	NaN	NaN	NaN	NaN	NaN	NaN	NaN	NaN	NaN	NaN	NaN	25.9766	NaN	NaN	0.247836	NaN	NaN	11	11	17.1	0	10.511	22	anatomical structure homeostasis;biological regulation;bone resorption;cell surface receptor linked signaling pathway;cellular macromolecule metabolic process;cellular metabolic process;cellular process;cellular protein metabolic process;cellular response to stimulus;homeostatic process;macromolecule metabolic process;macromolecule modification;metabolic process;negative regulation of apoptosis;n…	acid-amino acid ligase activity;binding;calcium ion binding;catalytic activity;cation binding;ion binding;ligase activity;ligase activity, forming carbon-nitrogen bonds;metal ion binding;molecular transducer activity;signal transducer activity;small conjugating protein ligase activity;transition metal ion binding;ubiquitin-protein ligase activity;zinc ion binding	cell part;cytoplasm;intracellular membrane-bounded organelle;intracellular organelle;intracellular part;membrane;membrane-bounded organelle;nucleus;organelle;plasma membrane	Bacterial invasion of epithelial cells;Chronic myeloid leukemia;Endocytosis;ErbB signaling pathway;Insulin signaling pathway;Jak-STAT signaling pathway;Pathways in cancer;T cell receptor signaling pathway;Ubiquitin mediated proteolysis					0	1	NaN	-4.34294e-08	1	0	0	0.885811	NaN
NaN	NaN	NaN	NaN	NaN	NaN	NaN	23.3244	NaN	NaN	NaN	NaN	NaN	NaN	NaN	NaN	NaN	NaN	NaN	NaN	NaN	23.3244	NaN	NaN	NaN	NaN	NaN	1	1	11.7	0.00016168	0.88778	2	amine metabolic process;aminoglycan biosynthetic process;aminoglycan metabolic process;anatomical structure formation involved in morphogenesis;biosynthetic process;carbohydrate biosynthetic process;carbohydrate metabolic process;cell differentiation;cellular biosynthetic process;cellular carbohydrate biosynthetic process;cellular carbohydrate metabolic process;cellular developmental process;cell…	acetylglucosaminyltransferase activity;binding;catalytic activity;glucuronosyl-N-acetylglucosaminyl-proteoglycan 4-alpha-N-acetylglucosaminyltransferase activity;glucuronosyltransferase activity;heparan sulfate N-acetylglucosaminyltransferase activity;identical protein binding;N-acetylglucosaminyl-proteoglycan 4-beta-glucuronosyltransferase activity;protein binding;protein dimerization activity;p…	cell part;cytoplasmic part;endoplasmic reticulum membrane;endoplasmic reticulum part;Golgi apparatus part;Golgi membrane;integral to membrane;intracellular organelle part;intracellular part;intrinsic to endoplasmic reticulum membrane;intrinsic to membrane;intrinsic to organelle membrane;membrane;membrane part;organelle membrane;organelle part	Glycosaminoglycan biosynthesis - heparan sulfate					0	1	NaN	-4.34294e-08	1	0	0	1	NaN
NaN	NaN	NaN	NaN	NaN	NaN	26.3833	26.8965	NaN	NaN	NaN	NaN	NaN	NaN	NaN	NaN	NaN	NaN	NaN	NaN	NaN	26.6399	NaN	NaN	0.36293	NaN	NaN	5	5	29.2	0	8.384	10	cell differentiation;cellular developmental process;cellular process;developmental process;leukocyte differentiation;monocyte differentiation;myeloid cell differentiation;myeloid leukocyte differentiation	binding;catalytic activity;cation binding;dioxygenase activity;ion binding;metal ion binding;oxidoreductase activity;oxidoreductase activity, acting on single donors with incorporation of molecular oxygen;oxidoreductase activity, acting on single donors with incorporation of molecular oxygen, incorporation of two atoms of oxygen;quercetin 2,3-dioxygenase activity	cell part;cytoplasm;intracellular membrane-bounded organelle;intracellular organelle;intracellular part;membrane-bounded organelle;nucleus;organelle						0	1	NaN	-4.34294e-08	1	0	0	1	NaN
NaN	NaN	NaN	NaN	NaN	NaN	21.5267	NaN	NaN	NaN	NaN	NaN	NaN	NaN	NaN	NaN	NaN	NaN	NaN	NaN	NaN	21.5267	NaN	NaN	NaN	NaN	NaN	1	1	4.8	0.0022779	0.59209	1			cell part;intracellular membrane-bounded organelle;intracellular organelle;intracellular part;membrane-bounded organelle;nucleus;organelle						0	1	NaN	-4.34294e-08	1	0	0	1	NaN
NaN	NaN	24.114	NaN	23.842	24.5987	24.2759	24.5737	NaN	NaN	NaN	NaN	NaN	NaN	24.9634	NaN	NaN	NaN	NaN	NaN	25.1571	24.2759	24.9634	25.1571	0.319088	NaN	NaN	2	2	8.4	0.00016692	1.0605	11	biosynthetic process;cellular component assembly;cellular component assembly at cellular level;cellular component biogenesis;cellular component organization;cellular component organization at cellular level;cellular component organization or biogenesis;cellular component organization or biogenesis at cellular level;cellular macromolecular complex assembly;cellular macromolecular complex subunit o…	catalytic activity;transferase activity	cell part;cytoplasmic part;intracellular membrane-bounded organelle;intracellular organelle;intracellular organelle part;intracellular part;membrane;membrane-bounded organelle;mitochondrial inner membrane;mitochondrial membrane;mitochondrial part;mitochondrion;organelle;organelle inner membrane;organelle membrane;organelle part						0	1	-0.87623	0	1	-0.193661	0	1	0.68257
NaN	NaN	NaN	NaN	NaN	NaN	26.1232	25.6017	NaN	NaN	NaN	NaN	NaN	NaN	NaN	25.933	NaN	NaN	NaN	NaN	NaN	25.8624	25.933	NaN	0.368714	NaN	NaN	11	11	7	0	8.1208	23	cellular macromolecule metabolic process;cellular metabolic process;cellular nitrogen compound metabolic process;cellular process;macromolecule metabolic process;metabolic process;mRNA metabolic process;mRNA processing;nitrogen compound metabolic process;nucleic acid metabolic process;nucleobase-containing compound metabolic process;primary metabolic process;RNA metabolic process;RNA processing;R…		cell part;intracellular membrane-bounded organelle;intracellular organelle;intracellular part;membrane-bounded organelle;nucleus;organelle						0	1	NaN	0	1	NaN	0	1	0.0705194
NaN	NaN	NaN	NaN	NaN	NaN	NaN	NaN	NaN	NaN	NaN	NaN	NaN	NaN	NaN	NaN	NaN	NaN	27.148	NaN	NaN	NaN	NaN	27.148	NaN	NaN	NaN	1	1	1.3	0.0022751	0.58678	1		binding;chromatin binding;DNA binding;nucleic acid binding							0	1	NaN	0	1	NaN	-4.34294e-08	1	0
27.3644	27.4862	NaN	26.0954	26.3678	26.9056	26.0215	26.6446	27.4914	26.9607	27.4587	27.7183	26.9108	26.7208	27.3389	27.4209	27.6136	28.0176	28.2633	NaN	27.3695	26.6446	27.3799	27.8156	0.583241	0.3458	0.400398	16	16	24.4	0	22.336	68			cell part;cytoplasm;intracellular part		+			CTX_WT	2.08302	0.0196386	-1.11806	1.52804	0.10076	-0.563443	1.39467	0.068648	0.554619
NaN	NaN	25.5726	25.8845	26.6938	26.8937	26.3327	26.8365	26.1823	25.4331	NaN	NaN	25.9104	25.9547	26.3318	26.6298	NaN	NaN	26.77	NaN	NaN	26.5132	26.0685	26.77	0.542152	0.409599	NaN	11	11	20.8	0	9.9159	41	carbohydrate metabolic process;catabolic process;cellular carbohydrate metabolic process;cellular catabolic process;cellular macromolecule catabolic process;cellular macromolecule metabolic process;cellular metabolic process;cellular process;cellular protein metabolic process;ER-associated protein catabolic process;glycosylation;macromolecule catabolic process;macromolecule glycosylation;macromol…	binding;calcium ion binding;catalytic activity;cation binding;hydrolase activity;hydrolase activity, acting on glycosyl bonds;hydrolase activity, hydrolyzing O-glycosyl compounds;ion binding;mannosidase activity;mannosyl-oligosaccharide 1,2-alpha-mannosidase activity;mannosyl-oligosaccharide mannosidase activity;metal ion binding	cell part;cytoplasmic part;endoplasmic reticulum membrane;endoplasmic reticulum part;integral to membrane;intracellular organelle part;intracellular part;intrinsic to membrane;membrane;membrane part;organelle membrane;organelle part	N-Glycan biosynthesis;Protein processing in endoplasmic reticulum;Various types of N-glycan biosynthesis					0	1	-0.401061	0	1	-0.696333	0.505623	0.393106	-0.295272
28.3866	28.7139	28.7859	28.3988	28.3254	28.605	28.6585	28.5207	29.4108	29.7111	27.8638	27.5926	29.2523	29.2315	30.8224	30.925	29.5469	29.5544	31.0989	32.6022	32.6407	28.5629	29.3316	31.0989	0.168269	1.20138	1.53547	21	20	39.7	0	47.486	230	biosynthetic process;cellular biosynthetic process;cellular metabolic compound salvage;cellular metabolic process;cellular nitrogen compound biosynthetic process;cellular nitrogen compound metabolic process;cellular process;heterocycle biosynthetic process;heterocycle metabolic process;IMP biosynthetic process;IMP metabolic process;IMP salvage;metabolic process;nitrogen compound metabolic process…	AMP deaminase activity;binding;catalytic activity;cation binding;deaminase activity;hydrolase activity;hydrolase activity, acting on carbon-nitrogen (but not peptide) bonds;hydrolase activity, acting on carbon-nitrogen (but not peptide) bonds, in cyclic amidines;ion binding;metal ion binding			+			CTX_WT	3.2296	0.000896	-2.53927	1.3665	0.0532555	-1.73743	1.08299	0.0834397	0.801844
NaN	NaN	NaN	NaN	NaN	NaN	NaN	NaN	24.2375	NaN	NaN	NaN	24.1378	24.312	NaN	NaN	NaN	NaN	NaN	NaN	NaN	NaN	24.2375	NaN	NaN	0.0873717	NaN	6	6	1.5	0	2.5453	10	response to stimulus	binding;calcium ion binding;cation binding;ion binding;metal ion binding	basement membrane;cell cortex;cell junction;cell part;cytoplasmic part;extracellular matrix part;extracellular region part;intracellular part						-4.34294e-08	1	0	0	1	NaN	0	1	NaN
NaN	NaN	NaN	NaN	23.5948	23.3822	22.9084	23.2232	NaN	NaN	NaN	NaN	NaN	NaN	NaN	NaN	NaN	NaN	NaN	NaN	NaN	23.3027	NaN	NaN	0.289137	NaN	NaN	2	2	2.1	0.00016404	0.95148	10	lipid metabolic process;metabolic process;primary metabolic process	catalytic activity;hydrolase activity	cell part;cytoplasmic part;endoplasmic reticulum;integral to membrane;intracellular membrane-bounded organelle;intracellular organelle;intracellular organelle part;intracellular part;intrinsic to membrane;lysosomal membrane;membrane;membrane part;membrane-bounded organelle;mitochondrial membrane;mitochondrial part;nuclear membrane;nuclear part;organelle;organelle membrane;organelle part;vacuolar …	Glycerophospholipid metabolism					0	1	NaN	-4.34294e-08	1	0	0	1	NaN
NaN	NaN	25.2607	25.4911	24.4812	24.2027	24.5826	24.6854	NaN	24.559	NaN	NaN	24.274	NaN	NaN	NaN	NaN	NaN	NaN	NaN	NaN	24.634	24.4165	NaN	0.49134	0.20154	NaN	3	3	11.4	0	2.5195	11	cellular macromolecule metabolic process;cellular metabolic process;cellular nitrogen compound metabolic process;cellular process;macromolecule metabolic process;metabolic process;ncRNA metabolic process;ncRNA processing;nitrogen compound metabolic process;nucleic acid metabolic process;nucleobase-containing compound metabolic process;primary metabolic process;RNA metabolic process;RNA processing…	catalytic activity;endonuclease activity;endonuclease activity, active with either ribo- or deoxyribonucleic acids and producing 5'-phosphomonoesters;endoribonuclease activity;endoribonuclease activity, producing 5'-phosphomonoesters;hydrolase activity;hydrolase activity, acting on ester bonds;nuclease activity;ribonuclease activity;ribonuclease P activity;tRNA-specific ribonuclease activity	cell part;intracellular non-membrane-bounded organelle;intracellular organelle;intracellular organelle part;intracellular part;non-membrane-bounded organelle;nuclear part;nucleolus;organelle;organelle part	Ribosome biogenesis in eukaryotes;RNA transport					0	1	NaN	0	1	NaN	0.441542	0.409735	-0.367465
25.5309	NaN	25.6494	26.2013	26.2017	26.0851	25.8144	25.5014	NaN	NaN	NaN	NaN	NaN	NaN	NaN	NaN	NaN	NaN	NaN	NaN	NaN	25.8144	NaN	NaN	0.307429	NaN	NaN	6	3	16.6	0	5.9161	15	cellular macromolecule metabolic process;cellular metabolic process;cellular process;cellular protein metabolic process;macromolecule metabolic process;macromolecule modification;metabolic process;N-terminal peptidyl-glycine N-myristoylation;N-terminal protein amino acid modification;N-terminal protein lipidation;N-terminal protein myristoylation;peptidyl-amino acid modification;peptidyl-glycine …	catalytic activity;glycylpeptide N-tetradecanoyltransferase activity;myristoyltransferase activity;N-acyltransferase activity;transferase activity;transferase activity, transferring acyl groups;transferase activity, transferring acyl groups other than amino-acyl groups	cell part;cytoplasm;cytoplasmic part;Golgi apparatus;intracellular membrane-bounded organelle;intracellular organelle;intracellular part;membrane;membrane-bounded organelle;organelle;plasma membrane						0	1	NaN	-4.34294e-08	1	0	0	1	NaN
29.171	29.0941	27.3007	28.1472	27.598	28.1821	27.7144	26.6512	27.2038	27.62	28.24	28.0953	27.3405	27.0716	27.7752	NaN	NaN	NaN	NaN	NaN	NaN	27.9308	27.62	NaN	0.859598	0.444692	NaN	24	22	35.2	0	13.84	90			cell part;cytoplasm;cytoskeletal part;intracellular non-membrane-bounded organelle;intracellular organelle;intracellular organelle part;intracellular part;non-membrane-bounded organelle;organelle;organelle part;spindle						0	1	NaN	0	1	NaN	0.473367	0.388806	-0.361451
26.6391	26.1152	24.8073	NaN	NaN	25.1908	NaN	25.3397	NaN	NaN	NaN	25.8975	NaN	NaN	NaN	NaN	NaN	NaN	NaN	NaN	NaN	25.3397	25.8975	NaN	0.742794	NaN	NaN	7	7	39.6	0	5.2539	14			cell part;cytoplasmic part;intracellular membrane-bounded organelle;intracellular organelle;intracellular organelle part;intracellular part;membrane;membrane-bounded organelle;microbody;microbody membrane;microbody part;organelle;organelle membrane;organelle part;peroxisomal membrane;peroxisomal part						0	1	NaN	0	1	NaN	0	1	0.279082
26.0293	25.0499	27.3216	27.1927	27.6462	27.6733	28.729	27.8615	27.2037	27.6919	26.8195	26.5638	27.9126	27.9299	29.2197	28.8741	26.5911	NaN	27.1592	28.3522	28.354	27.4839	27.8022	27.7557	1.14677	0.929784	0.884243	16	16	44.4	0	29.077	109	cellular macromolecule metabolic process;cellular metabolic process;cellular process;cellular protein metabolic process;dephosphorylation;macromolecule metabolic process;macromolecule modification;metabolic process;peptidyl-threonine dephosphorylation;phosphate-containing compound metabolic process;phosphorus metabolic process;primary metabolic process;protein dephosphorylation;protein metabolic …	[pyruvate dehydrogenase (lipoamide)] phosphatase activity;binding;calcium ion binding;catalytic activity;cation binding;hydrolase activity;hydrolase activity, acting on ester bonds;ion binding;metal ion binding;phosphatase activity;phosphoprotein phosphatase activity;phosphoric ester hydrolase activity;protein serine/threonine phosphatase activity	cell part;cytoplasmic part;intracellular membrane-bounded organelle;intracellular organelle;intracellular organelle lumen;intracellular organelle part;intracellular part;membrane-bounded organelle;membrane-enclosed lumen;mitochondrial matrix;mitochondrial part;mitochondrion;organelle;organelle lumen;organelle part						0.27419	1	-0.426175	0.109205	1	0.162788	0.555742	0.283635	0.588962
28.3177	28.1351	27.2619	27.5324	27.9242	27.7729	27.498	27.3488	27.2495	27.1922	28.0274	27.9884	27.6391	27.4624	27.0755	26.717	27.3747	26.9769	26.0658	26.7468	NaN	27.6526	27.356	26.8619	0.37911	0.452875	0.548697	22	22	32.6	0	32.375	120	cellular component organization;cellular component organization or biogenesis;cellular membrane organization;cellular process;endocytosis;establishment of localization;membrane invagination;membrane organization;transport;vesicle-mediated transport	binding;calcium ion binding;cation binding;ion binding;metal ion binding	cell part;coated pit;intracellular membrane-bounded organelle;intracellular organelle;intracellular part;membrane;membrane part;membrane-bounded organelle;nucleus;organelle;plasma membrane		+			CTX_WT	2.2321	0.0198437	0.932831	1.22185	0.14521	0.627918	0.779101	0.261207	-0.304914
NaN	NaN	NaN	NaN	NaN	NaN	22.8462	NaN	NaN	NaN	NaN	NaN	NaN	NaN	NaN	NaN	NaN	NaN	NaN	NaN	NaN	22.8462	NaN	NaN	NaN	NaN	NaN	1	1	13	0.00016502	0.99106	1			cell part;cytoplasmic part;integral to membrane;intracellular membrane-bounded organelle;intracellular organelle;intracellular organelle part;intracellular part;intrinsic to membrane;membrane;membrane part;membrane-bounded organelle;microbody;microbody membrane;microbody part;organelle;organelle membrane;organelle part;peroxisomal membrane;peroxisomal part	Peroxisome					0	1	NaN	-4.34294e-08	1	0	0	1	NaN
NaN	NaN	24.378	25.2259	24.9895	25.4305	25.1914	24.7403	NaN	NaN	25.1591	NaN	NaN	24.844	25.1366	24.8339	NaN	NaN	NaN	NaN	26.3229	25.0905	24.9903	26.3229	0.381324	0.178633	NaN	5	4	11.1	0	7.0244	20	biological regulation;cellular component organization;cellular component organization or biogenesis;neuromuscular junction development;regulation of biological process;regulation of multicellular organismal process;regulation of system process;regulation of vasoconstriction;regulation of vasoconstriction by circulating norepinephrine;regulation of vasoconstriction by norepinephrine;synapse organi…	binding;lipid binding;phospholipid binding	cell junction;cell part;cytoplasm;cytoskeleton;intracellular;intracellular non-membrane-bounded organelle;intracellular organelle;intracellular part;macromolecular complex;membrane;non-membrane-bounded organelle;organelle;plasma membrane;postsynaptic membrane;protein complex;sarcolemma;synapse part;synaptic membrane						0	1	-1.33034	0	1	-1.32953	0.00130848	1	0.000805219
NaN	NaN	25.9127	26.2112	26.396	25.4906	26.5435	26.3965	25.6624	25.9555	NaN	NaN	NaN	26.4686	25.986	25.5882	NaN	NaN	NaN	26.5017	26.5818	26.3036	25.9555	26.5417	0.392552	0.347238	0.0565833	12	12	8.8	0	12.792	41			adherens junction;anchoring junction;cell junction;cell part;cell-substrate adherens junction;cell-substrate junction;focal adhesion;integral to membrane;intrinsic to membrane;membrane part						0.621718	0.596619	-0.38333	1.17696	0.155456	-0.609578	0.464999	0.457939	-0.226248
NaN	NaN	NaN	24.4374	25.6888	25.5879	25.8378	NaN	25.1681	NaN	NaN	NaN	24.9926	NaN	NaN	NaN	NaN	NaN	NaN	NaN	NaN	25.6383	25.0803	NaN	0.641982	0.12409	NaN	3	3	12.1	0	2.2402	11									0	1	NaN	0	1	NaN	0.251885	0.615467	-0.307667
28.117	28.2975	28.6649	29.0748	28.5795	28.6505	29.1344	28.9927	29.1446	28.9211	28.7794	29.1656	29.3502	29.3682	28.9485	29.1129	28.4914	27.8872	29.4529	27.5307	28.5451	28.6577	29.1287	28.4914	0.365264	0.2066	0.733989	29	29	33.7	0	34.888	236	anatomical structure development;anatomical structure formation involved in morphogenesis;anatomical structure morphogenesis;angiogenesis;apoptotic cell clearance;biological adhesion;biological regulation;blood vessel development;calcium ion homeostasis;calcium ion transport;calcium ion transport into cytosol;cation homeostasis;cation transport;cell activation;cell adhesion;cell differentiation;c…	binding;calcium channel activity;cation binding;cation channel activity;cation transmembrane transporter activity;channel activity;cytokine binding;gated channel activity;growth factor binding;ion binding;ion channel activity;ion transmembrane transporter activity;metal ion binding;passive transmembrane transporter activity;protein binding;protein dimerization activity;protein heterodimerization …	alphav-beta3 integrin complex;alphav-beta3 integrin-IGF-1-IGF1R complex;cell part;external side of plasma membrane;integral to membrane;integrin complex;intracellular membrane-bounded organelle;intracellular organelle;intracellular part;intrinsic to membrane;macromolecular complex;membrane part;membrane-bounded organelle;nucleus;organelle;plasma membrane part;protein complex;receptor complex	Arrhythmogenic right ventricular cardiomyopathy (ARVC);Cell adhesion molecules (CAMs);Dilated cardiomyopathy;ECM-receptor interaction;Focal adhesion;Hypertrophic cardiomyopathy (HCM);Pathways in cancer;Phagosome;Regulation of actin cytoskeleton;Small cell lung cancer					0.480537	0.793728	0.307418	1.65708	0.0628879	0.717314	1.81648	0.0614335	0.409896
NaN	25.966	NaN	26.0356	25.602	26.5281	26.3679	25.6186	26.5723	NaN	NaN	NaN	27.119	NaN	26.1365	NaN	27.7843	27.5395	NaN	NaN	NaN	26.0008	26.5723	27.6619	0.379013	0.492308	0.173072	7	7	22.7	0	12.593	23	antigen processing and presentation;immune response;immune system process;response to stimulus		cell part;integral to membrane;intrinsic to membrane;macromolecular complex;membrane part;MHC class I protein complex;MHC protein complex;plasma membrane part;protein complex		+			CTX_WT	2.89775	0.00240597	-1.64216	1.1626	0.105572	-1.0526	1.07462	0.105389	0.589557
NaN	NaN	24.0827	23.4471	NaN	NaN	NaN	NaN	NaN	NaN	NaN	NaN	NaN	NaN	NaN	NaN	NaN	NaN	NaN	NaN	NaN	23.7649	NaN	NaN	0.449451	NaN	NaN	3	3	9.4	0.00016981	1.1645	8	establishment of localization;transport		cell part;cytoplasmic part;integral to membrane;intracellular membrane-bounded organelle;intracellular organelle;intracellular organelle part;intracellular part;intrinsic to membrane;membrane;membrane part;membrane-bounded organelle;mitochondrial inner membrane;mitochondrial membrane;mitochondrial part;mitochondrion;organelle;organelle inner membrane;organelle membrane;organelle part						0	1	NaN	-4.34294e-08	1	0	0	1	NaN
28.4633	28.1202	29.4344	29.5325	29.9067	29.533	29.7997	29.6908	30.0706	29.8249	28.4309	29.4254	30.5277	30.552	31.0471	30.9843	29.779	29.9821	31.0689	31.5193	31.5662	29.5327	30.2991	31.0689	0.653359	0.876959	0.84954	29	29	34.8	0	28.21	254	cation transport;cellular metabolic process;cellular process;establishment of localization;hydrogen transport;ion transport;metabolic process;monovalent inorganic cation transport;proton transport;reactive oxygen species metabolic process;transport	binding;catalytic activity;coenzyme binding;cofactor binding;NAD(P)+ transhydrogenase (AB-specific) activity;NAD(P)+ transhydrogenase activity;NADP binding;nucleotide binding;oxidoreductase activity;oxidoreductase activity, acting on NADH or NADPH;oxidoreductase activity, acting on NADH or NADPH, NAD or NADP as acceptor	cell part;cytoplasmic part;integral to membrane;intracellular organelle part;intracellular part;intrinsic to membrane;membrane;membrane part;mitochondrial inner membrane;mitochondrial membrane;mitochondrial part;organelle inner membrane;organelle membrane;organelle part		+			CTX_WT	2.3308	0.00907193	-1.47303	0.700699	0.347053	-0.675253	1.23557	0.0634383	0.797779
NaN	NaN	NaN	NaN	NaN	NaN	21.0455	NaN	NaN	NaN	NaN	NaN	NaN	NaN	NaN	NaN	NaN	NaN	NaN	NaN	NaN	21.0455	NaN	NaN	NaN	NaN	NaN	2	2	1.4	0.0013999	0.69918	3	cell cycle;cell division;cellular process		cell part;centrosome;cytoplasm;cytoplasmic part;cytoskeletal part;intracellular non-membrane-bounded organelle;intracellular organelle;intracellular organelle part;intracellular part;microtubule organizing center;non-membrane-bounded organelle;organelle;organelle part						0	1	NaN	-4.34294e-08	1	0	0	1	NaN
26.694	26.6036	27.7781	27.7495	27.8943	27.8652	28.6192	28.1304	27.4147	27.242	NaN	26.4964	27.7365	27.6143	27.2668	26.7844	NaN	NaN	NaN	26.4463	26.5283	27.8217	27.2668	26.4873	0.68755	0.442756	0.0579981	21	21	49.8	0	28.322	88	biosynthetic process;cellular biosynthetic process;cellular lipid metabolic process;cellular metabolic process;cellular process;ether lipid biosynthetic process;ether lipid metabolic process;glycerol ether biosynthetic process;glycerol ether metabolic process;glycerolipid biosynthetic process;glycerolipid metabolic process;lipid biosynthetic process;lipid metabolic process;metabolic process;organ…	alkylglycerone-phosphate synthase activity;binding;catalytic activity;coenzyme binding;cofactor binding;FAD binding;flavin adenine dinucleotide binding;oxidoreductase activity;oxidoreductase activity, acting on CH-OH group of donors;oxidoreductase activity, acting on the CH-OH group of donors, NAD or NADP as acceptor;transferase activity;transferase activity, transferring alkyl or aryl (other tha…	cell part;cytoplasmic part;intracellular membrane-bounded organelle;intracellular organelle;intracellular organelle part;intracellular part;membrane;membrane-bounded organelle;microbody;microbody membrane;microbody part;mitochondrion;organelle;organelle membrane;organelle part;peroxisomal membrane;peroxisomal part	Ether lipid metabolism;Peroxisome					1.30957	0.0867034	1.17949	1.21666	0.127823	0.734879	0.776379	0.211444	-0.44461
NaN	NaN	NaN	NaN	NaN	NaN	NaN	NaN	NaN	NaN	NaN	NaN	NaN	NaN	27.4972	NaN	NaN	NaN	NaN	NaN	NaN	NaN	27.4972	NaN	NaN	NaN	NaN	4	1	29.8	0.00016886	1.1331	4	anatomical structure development;anatomical structure morphogenesis;appendage morphogenesis;biological regulation;cellular macromolecule metabolic process;cellular metabolic process;cellular process;cellular protein metabolic process;developmental process;face morphogenesis;limb morphogenesis;macromolecule metabolic process;macromolecule modification;metabolic process;negative regulation of biolo…	catalytic activity;oxidoreductase activity;oxidoreductase activity, acting on paired donors, with incorporation or reduction of molecular oxygen;oxidoreductase activity, acting on paired donors, with incorporation or reduction of molecular oxygen, 2-oxoglutarate as one donor, and incorporation of one atom each of oxygen into both donors;peptide-aspartate beta-dioxygenase activity	cell part;integral to membrane;intrinsic to membrane;membrane part						-4.34294e-08	1	0	0	1	NaN	0	1	NaN
29.9905	30.0539	29.6957	29.6994	29.9776	29.7648	30.663	31.1381	29.4102	29.5628	30.5547	30.5512	29.4569	29.3662	30.6337	29.8937	29.5241	29.5602	28.6923	29.7496	27.2273	29.9841	29.7282	29.5241	0.514883	0.563071	1.04589	6	6	41.8	0	13.165	100	adult behavior;adult locomotory behavior;behavior;biological regulation;locomotory behavior;multicellular organismal process;negative regulation of catalytic activity;negative regulation of endopeptidase activity;negative regulation of hydrolase activity;negative regulation of molecular function;negative regulation of peptidase activity;regulation of apoptosis;regulation of biological process;reg…	cysteine-type endopeptidase inhibitor activity;endopeptidase inhibitor activity;endopeptidase regulator activity;enzyme inhibitor activity;enzyme regulator activity;peptidase inhibitor activity;peptidase regulator activity	cell part;cytoplasm;intracellular non-membrane-bounded organelle;intracellular organelle;intracellular organelle part;intracellular part;non-membrane-bounded organelle;nuclear part;nucleolus;organelle;organelle part		+			CTX_WT	1.70968	0.0389506	1.17218	1.3121	0.0841926	0.977987	0.315651	0.589652	-0.194192
NaN	23.8481	NaN	NaN	NaN	NaN	NaN	NaN	NaN	NaN	NaN	NaN	NaN	NaN	NaN	NaN	NaN	NaN	NaN	NaN	NaN	23.8481	NaN	NaN	NaN	NaN	NaN	3	3	17	0.0009434	0.73915	4		protein binding transcription factor activity;RNA polymerase II transcription cofactor activity;RNA polymerase II transcription factor binding transcription factor activity;transcription cofactor activity;transcription factor binding transcription factor activity	cell part;intracellular organelle part;intracellular part;macromolecular complex;mediator complex;nuclear part;nucleoplasm part;organelle part;protein complex						0	1	NaN	-4.34294e-08	1	0	0	1	NaN
25.8269	25.9085	27.4478	27.6445	27.6063	27.2995	28.0443	28.1155	27.3947	27.109	26.7296	27.0174	28.207	27.949	28.889	28.4054	28.4147	28.2254	28.6859	29.0101	28.2551	27.527	27.6718	28.4147	0.888644	0.763388	0.330083	9	9	23	0	14.296	88	alcohol catabolic process;alcohol metabolic process;amine catabolic process;amine metabolic process;benzene-containing compound metabolic process;biological regulation;catabolic process;catecholamine catabolic process;catecholamine metabolic process;catechol-containing compound catabolic process;catechol-containing compound metabolic process;cellular amine metabolic process;cellular aromatic comp…	catalytic activity;oxidoreductase activity	cell part;cytoplasmic part;integral to membrane;intracellular membrane-bounded organelle;intracellular organelle;intracellular organelle part;intracellular part;intrinsic to membrane;membrane;membrane part;membrane-bounded organelle;mitochondrial membrane;mitochondrial outer membrane;mitochondrial part;mitochondrion;organelle;organelle membrane;organelle outer membrane;organelle part;outer membra…	Arginine and proline metabolism;Drug metabolism - cytochrome P450;Glycine, serine and threonine metabolism;Histidine metabolism;Isoquinoline alkaloid biosynthesis;Phenylalanine metabolism;Tryptophan metabolism;Tyrosine metabolism	+			CTX_WT	1.95911	0.0212964	-1.28155	1.3045	0.100842	-0.805564	0.569068	0.295413	0.475987
NaN	NaN	NaN	NaN	NaN	NaN	24.2215	24.1821	NaN	NaN	NaN	NaN	NaN	NaN	NaN	NaN	NaN	NaN	NaN	NaN	NaN	24.2018	NaN	NaN	0.0278601	NaN	NaN	3	3	4.2	0	3.0667	5	actin cytoskeleton organization;actin filament-based process;biological regulation;cell projection assembly;cell projection organization;cellular component assembly;cellular component assembly at cellular level;cellular component organization;cellular component organization at cellular level;cellular component organization or biogenesis;cellular component organization or biogenesis at cellular le…	binding;cation binding;enzyme regulator activity;GTPase regulator activity;guanyl-nucleotide exchange factor activity;ion binding;lipid binding;metal ion binding;nucleoside-triphosphatase regulator activity;phospholipid binding;Ras guanyl-nucleotide exchange factor activity;Rho guanyl-nucleotide exchange factor activity;small GTPase regulator activity	cell part;cell projection;cytoplasmic part;cytoskeleton;Golgi apparatus;intracellular membrane-bounded organelle;intracellular non-membrane-bounded organelle;intracellular organelle;intracellular part;lamellipodium;membrane;membrane-bounded organelle;non-membrane-bounded organelle;nucleus;organelle;plasma membrane;ruffle	Regulation of actin cytoskeleton					0	1	NaN	-4.34294e-08	1	0	0	1	NaN
NaN	NaN	NaN	NaN	NaN	NaN	25.1275	25.5735	NaN	NaN	NaN	NaN	NaN	NaN	NaN	NaN	NaN	NaN	NaN	NaN	NaN	25.3505	NaN	NaN	0.315334	NaN	NaN	6	6	9.3	0	12.583	10	catabolic process;cellular catabolic process;cellular macromolecule catabolic process;cellular macromolecule metabolic process;cellular metabolic process;cellular process;macromolecule catabolic process;macromolecule metabolic process;metabolic process;modification-dependent macromolecule catabolic process;modification-dependent protein catabolic process;primary metabolic process;protein metaboli…	catalytic activity;cysteine-type peptidase activity;hydrolase activity;hydrolase activity, acting on ester bonds;peptidase activity;peptidase activity, acting on L-amino acid peptides;thiolester hydrolase activity;ubiquitin thiolesterase activity	cell part;cytoplasmic part;intracellular membrane-bounded organelle;intracellular organelle;intracellular part;membrane-bounded organelle;mitochondrion;nucleus;organelle						0	1	NaN	-4.34294e-08	1	0	0	1	NaN
25.283	25.2716	25.7122	25.7847	26.5567	26.8446	25.0315	25.6016	NaN	NaN	NaN	NaN	26.1077	26.3621	26.2532	26.8055	NaN	NaN	NaN	NaN	NaN	25.6569	26.3077	NaN	0.636474	0.30086	NaN	6	5	24.6	0	6.4413	29			cell part;integral to membrane;intrinsic to membrane;membrane part						0	1	NaN	0	1	NaN	1.00567	0.115236	0.62142
25.7864	25.9753	28.6071	28.8002	28.8116	28.8363	29.0809	29.3661	27.6001	27.5802	26.4898	26.4107	27.8122	28.012	28.6307	28.469	NaN	NaN	25.2182	27.5169	27.1298	28.8059	27.7061	27.1298	1.42436	0.817158	1.23073	10	10	39.2	0	19.929	120	alcohol metabolic process;anatomical structure development;anatomical structure formation involved in morphogenesis;angiogenesis;anterior/posterior pattern specification;biological regulation;carbohydrate metabolic process;cell surface receptor linked signaling pathway;cellular carbohydrate metabolic process;cellular macromolecule metabolic process;cellular metabolic process;cellular process;cell…	catalytic activity;fucosyltransferase activity;peptide-O-fucosyltransferase activity;transferase activity;transferase activity, transferring glycosyl groups;transferase activity, transferring hexosyl groups	cell part;cytoplasmic part;endoplasmic reticulum;intracellular membrane-bounded organelle;intracellular organelle;intracellular part;membrane;membrane-bounded organelle;organelle	Other types of O-glycan biosynthesis					0.868364	0.221882	1.53637	0.843369	0.221985	1.00396	0.426373	0.387574	-0.53241
27.6064	27.2363	27.747	27.3163	28.2633	27.8458	28.4399	28.4328	27.8278	27.6307	26.8896	26.2175	27.8196	28.1078	28.7142	28.1645	28.0918	28.4804	27.0613	28.8944	28.6527	27.7964	27.8237	28.4804	0.476436	0.783232	0.718963	8	8	16	0	8.9562	81		active transmembrane transporter activity;amine transmembrane transporter activity;choline transmembrane transporter activity;substrate-specific transmembrane transporter activity;substrate-specific transporter activity;transmembrane transporter activity;transporter activity	cell part;cytoplasmic part;integral to membrane;intracellular organelle part;intracellular part;intrinsic to membrane;membrane;membrane part;mitochondrial membrane;mitochondrial outer membrane;mitochondrial part;organelle membrane;organelle outer membrane;organelle part;outer membrane;plasma membrane						0.555981	0.664824	-0.37513	0.658732	0.401266	-0.564615	0.245565	0.66273	-0.189485
27.8693	28.3319	27.4275	27.4503	26.961	26.8215	27.6672	27.6518	27.2095	27.2089	27.7343	27.6707	27.433	26.8859	27.3477	27.3627	NaN	NaN	NaN	NaN	NaN	27.5511	27.3552	NaN	0.483119	0.270535	NaN	33	21	25	0	24.725	107	biological regulation;cellular macromolecule metabolic process;cellular metabolic process;cellular nitrogen compound metabolic process;cellular process;gamete generation;macromolecule metabolic process;male gamete generation;metabolic process;multicellular organismal process;multicellular organismal reproductive process;nitrogen compound metabolic process;nucleic acid metabolic process;nucleobase…	binding;DNA binding;nucleic acid binding;RNA binding;translation factor activity, nucleic acid binding;translation initiation factor activity		RNA transport;Viral myocarditis					0	1	NaN	0	1	NaN	0.386409	0.558922	-0.165987
NaN	NaN	NaN	NaN	23.3786	NaN	NaN	NaN	NaN	NaN	NaN	NaN	NaN	NaN	NaN	NaN	NaN	NaN	NaN	NaN	NaN	23.3786	NaN	NaN	NaN	NaN	NaN	7	1	23.4	0	3.5231	3	biological regulation;gamete generation;male gamete generation;multicellular organismal process;multicellular organismal reproductive process;positive regulation of biological process;positive regulation of biosynthetic process;positive regulation of cell cycle process;positive regulation of cellular biosynthetic process;positive regulation of cellular metabolic process;positive regulation of cel…								0	1	NaN	-4.34294e-08	1	0	0	1	NaN
27.2652	26.498	28.4229	28.4161	28.8014	28.9898	28.4581	29.1219	27.7382	27.5181	26.4751	25.8122	28.1505	28.3359	26.6803	28.5668	26.6234	26.3749	26.3913	26.5012	27.096	28.4405	27.6282	26.5012	0.906448	0.987256	0.296007	22	22	24.3	0	39.529	88	biological regulation;positive regulation of biological process;positive regulation of cell differentiation;positive regulation of cellular process;positive regulation of developmental process;positive regulation of fat cell differentiation;regulation of biological process;regulation of cell differentiation;regulation of cellular process;regulation of developmental process;regulation of fat cell …		cell part;cytoplasmic part;endoplasmic reticulum;integral to membrane;intracellular membrane-bounded organelle;intracellular organelle;intracellular part;intrinsic to membrane;membrane part;membrane-bounded organelle;organelle		+			CTX_WT	2.59446	0.00473298	1.64931	0.977302	0.185797	0.812298	1.00385	0.0957366	-0.837015
NaN	NaN	NaN	NaN	26.7295	26.7116	NaN	NaN	26.6998	NaN	26.3417	27.7122	27.2661	27.3519	NaN	NaN	27.2643	27.6986	28.6524	NaN	NaN	26.7206	27.2661	27.6986	0.012636	0.54722	0.710059	4	4	13.5	0	7.8375	37	acylglycerol biosynthetic process;acylglycerol metabolic process;biological regulation;biosynthetic process;carbohydrate metabolic process;CDP-diacylglycerol biosynthetic process;CDP-diacylglycerol metabolic process;cellular biosynthetic process;cellular lipid metabolic process;cellular metabolic process;cellular process;cellular response to stimulus;detection of abiotic stimulus;detection of ext…	catalytic activity;cytidylyltransferase activity;nucleotidyltransferase activity;phosphatidate cytidylyltransferase activity;transferase activity;transferase activity, transferring phosphorus-containing groups	cell part;cytoplasmic part;endoplasmic reticulum;integral to membrane;intracellular membrane-bounded organelle;intracellular organelle;intracellular organelle part;intracellular part;intrinsic to membrane;membrane;membrane part;membrane-bounded organelle;mitochondrial inner membrane;mitochondrial membrane;mitochondrial part;organelle;organelle inner membrane;organelle membrane;organelle part	Glycerophospholipid metabolism;Phosphatidylinositol signaling system					0.928464	0.207796	-1.15118	0.914211	0.209818	-0.7974	0.36942	0.475334	0.353779
NaN	24.9839	26.3052	26.1761	NaN	NaN	26.1635	26.6178	NaN	26.4156	NaN	25.5654	NaN	25.753	NaN	NaN	NaN	NaN	NaN	NaN	NaN	26.1761	25.753	NaN	0.623066	0.44665	NaN	6	6	27.6	0	4.0032	19	cellular component biogenesis;cellular component biogenesis at cellular level;cellular component organization or biogenesis;cellular component organization or biogenesis at cellular level;cellular process;ribonucleoprotein complex biogenesis;ribosome biogenesis		cell part;cytoplasmic part;intracellular non-membrane-bounded organelle;intracellular organelle;intracellular organelle part;intracellular part;macromolecular complex;membrane;non-membrane-bounded organelle;nuclear membrane;nuclear part;nucleolus;organelle;organelle membrane;organelle part;ribonucleoprotein complex;ribosome						0	1	NaN	0	1	NaN	0.123954	0.846617	-0.137985
29.8515	29.6345	31.0309	31.0912	31.2754	31.1739	31.9305	31.4218	30.3551	30.4533	29.5098	29.1001	30.6736	30.6288	31.0493	30.869	29.3693	29.4393	29.4895	30.2516	30.1609	31.1325	30.541	29.4895	0.783688	0.67787	0.427029	86	86	46.8	0	139.35	651	cellular macromolecule metabolic process;cellular metabolic process;cellular nitrogen compound metabolic process;cellular process;macromolecule metabolic process;metabolic process;mRNA metabolic process;mRNA processing;nitrogen compound metabolic process;nucleic acid metabolic process;nucleobase-containing compound metabolic process;primary metabolic process;RNA metabolic process;RNA processing;R…	adenyl nucleotide binding;adenyl ribonucleotide binding;ATP binding;ATPase activity;ATPase activity, coupled;ATP-dependent helicase activity;ATP-dependent RNA helicase activity;binding;catalytic activity;helicase activity;hydrolase activity;hydrolase activity, acting on acid anhydrides;hydrolase activity, acting on acid anhydrides, in phosphorus-containing anhydrides;nucleic acid binding;nucleosi…	catalytic step 2 spliceosome;cell part;intracellular organelle part;intracellular part;macromolecular complex;nuclear part;organelle part;ribonucleoprotein complex;small nuclear ribonucleoprotein complex;spliceosomal complex;U5 snRNP	Spliceosome	+			CTX_WT	1.97378	0.0222751	1.1841	0.946358	0.235268	0.587758	0.900129	0.142494	-0.596339
NaN	NaN	NaN	NaN	NaN	NaN	NaN	21.2769	NaN	NaN	NaN	NaN	NaN	NaN	NaN	NaN	NaN	NaN	NaN	NaN	NaN	21.2769	NaN	NaN	NaN	NaN	NaN	1	1	6.2	0	1.3485	5	amide biosynthetic process;amine metabolic process;anatomical structure development;arginine metabolic process;biological regulation;biosynthetic process;carboxylic acid metabolic process;cellular amide metabolic process;cellular amine metabolic process;cellular amino acid metabolic process;cellular biosynthetic process;cellular component assembly;cellular component organization;cellular componen…	arginase activity;binding;catalytic activity;cation binding;hydrolase activity;hydrolase activity, acting on carbon-nitrogen (but not peptide) bonds;hydrolase activity, acting on carbon-nitrogen (but not peptide) bonds, in linear amidines;ion binding;manganese ion binding;metal ion binding;transition metal ion binding	cell body;cell part;cell projection;cytoplasm;extracellular region part;extracellular space;intracellular part;neuron projection;neuronal cell body	Amoebiasis;Arginine and proline metabolism					0	0.922856	NaN	-4.34294e-08	1	0	0	0.810621	NaN
NaN	NaN	NaN	NaN	NaN	NaN	25.746	NaN	NaN	NaN	NaN	NaN	NaN	NaN	NaN	NaN	NaN	NaN	NaN	NaN	NaN	25.746	NaN	NaN	NaN	NaN	NaN	4	4	7.1	0	3.3503	4	biological regulation;cellular process;maintenance of location;maintenance of location in cell;maintenance of nucleus location;maintenance of organelle location;positive regulation of biological process;positive regulation of biosynthetic process;positive regulation of cellular biosynthetic process;positive regulation of cellular metabolic process;positive regulation of cellular process;positive …	binding;cation binding;ion binding;metal ion binding;nucleic acid binding;transition metal ion binding;zinc ion binding	cell part;intracellular membrane-bounded organelle;intracellular organelle;intracellular part;membrane-bounded organelle;nucleus;organelle						0	1	NaN	-4.34294e-08	1	0	0	1	NaN
30.5438	30.5739	31.0841	30.5663	30.8342	30.8462	29.6033	30.2675	30.2647	29.7427	30.3762	30.5111	30.3285	30.4908	29.3703	28.9529	29.0896	28.4987	29.5999	NaN	NaN	30.5701	30.2966	29.0896	0.451949	0.583167	0.551115	7	6	37.4	0	4.1825	62	activated T cell proliferation;anatomical structure development;biological adhesion;biosynthetic process;cell activation;cell adhesion;cell chemotaxis;cell development;cell migration;cell motility;cell proliferation;cell-cell adhesion;cellular biosynthetic process;cellular component movement;cellular developmental process;cellular extravasation;cellular macromolecule biosynthetic process;cellular…	binding;carbohydrate binding;glycoprotein binding;glycosaminoglycan binding;heparan sulfate proteoglycan binding;heparin binding;opsonin binding;pattern binding;polysaccharide binding;protein binding;proteoglycan binding;structural constituent of ribosome;structural molecule activity	cell part;cytoplasmic part;external side of plasma membrane;integral to membrane;intracellular membrane-bounded organelle;intracellular non-membrane-bounded organelle;intracellular organelle;intracellular part;intrinsic to membrane;macromolecular complex;membrane part;membrane-bounded organelle;non-membrane-bounded organelle;nucleus;organelle;plasma membrane part;ribonucleoprotein complex;ribosome	Ribosome	+			CTX_WT	2.88062	0.00305548	1.47718	1.40944	0.0709807	0.941905	1.22654	0.0899184	-0.535277
NaN	NaN	NaN	NaN	22.1314	NaN	NaN	NaN	NaN	NaN	NaN	NaN	NaN	NaN	NaN	NaN	NaN	NaN	NaN	NaN	NaN	22.1314	NaN	NaN	NaN	NaN	NaN	2	2	3.8	0.0013904	0.66666	2			cell part;cytoplasm;intracellular membrane-bounded organelle;intracellular organelle;intracellular part;membrane-bounded organelle;nucleus;organelle						0	1	NaN	-4.34294e-08	1	0	0	1	NaN
NaN	22.6216	NaN	NaN	NaN	NaN	NaN	NaN	NaN	NaN	NaN	NaN	NaN	NaN	NaN	NaN	NaN	NaN	NaN	NaN	NaN	22.6216	NaN	NaN	NaN	NaN	NaN	2	2	9.7	0.0047107	0.45142	3	biological adhesion;cell adhesion;cellular process		cell junction;cell part;integral to membrane;intrinsic to membrane;membrane;membrane part;plasma membrane						0	1	NaN	-4.34294e-08	1	0	0	1	NaN
28.1457	28.4787	26.8565	26.3873	27.5994	27.3951	25.7723	25.675	NaN	26.4221	26.8356	26.9715	NaN	25.5555	NaN	NaN	NaN	NaN	NaN	NaN	NaN	27.1258	26.6288	NaN	1.04616	0.638073	NaN	9	7	40.5	0	6.651	38	biological regulation;negative regulation of B cell activation;negative regulation of B cell differentiation;negative regulation of biological process;negative regulation of cell activation;negative regulation of cell differentiation;negative regulation of cellular process;negative regulation of developmental process;negative regulation of immune system process;negative regulation of leukocyte ac…	binding;DNA binding;nucleic acid binding	cell part;chromosome;intracellular membrane-bounded organelle;intracellular non-membrane-bounded organelle;intracellular organelle;intracellular part;membrane-bounded organelle;non-membrane-bounded organelle;nucleus;organelle						0	1	NaN	0	1	NaN	0.483158	0.333307	-0.592588
NaN	NaN	NaN	NaN	NaN	NaN	NaN	NaN	NaN	NaN	NaN	NaN	NaN	NaN	NaN	NaN	NaN	NaN	NaN	NaN	NaN	NaN	NaN	NaN	NaN	NaN	NaN	1	1	1.2	0.0022786	0.59492	1	adipose tissue development;adrenal gland development;ameboidal cell migration;anatomical structure development;anatomical structure morphogenesis;biological regulation;biosynthetic process;cell development;cell differentiation;cell migration;cell motility;cell surface receptor linked signaling pathway;cellular biosynthetic process;cellular component movement;cellular developmental process;cellula…	binding;DNA binding;nucleic acid binding;protein binding transcription factor activity;regulatory region DNA binding;regulatory region nucleic acid binding;transcription coactivator activity;transcription cofactor activity;transcription factor binding transcription factor activity;transcription regulatory region DNA binding	cell part;intracellular membrane-bounded organelle;intracellular organelle;intracellular part;membrane-bounded organelle;nucleus;organelle						-4.34294e-08	1	0	-4.34294e-08	1	0	-4.34294e-08	1	0
27.3305	27.2558	26.5769	26.6859	26.3562	26.6926	NaN	NaN	27.4394	26.6409	25.9739	NaN	NaN	26.5782	NaN	NaN	NaN	NaN	NaN	NaN	NaN	26.6893	26.6095	NaN	0.389599	0.601488	NaN	10	10	16	0	6.1318	22	activation of protein kinase activity;apoptosis;biological regulation;cell cycle phase;cell cycle process;cell death;cell division;cellular component organization;cellular component organization at cellular level;cellular component organization or biogenesis;cellular component organization or biogenesis at cellular level;cellular process;death;mitosis;nuclear division;organelle fission;organelle …		cell part;cytoplasm;cytoskeletal part;intracellular membrane-bounded organelle;intracellular non-membrane-bounded organelle;intracellular organelle;intracellular organelle part;intracellular part;macromolecular complex;membrane-bounded organelle;microtubule;non-membrane-bounded organelle;nucleus;organelle;organelle part;protein complex;spindle;spindle pole						0	1	NaN	0	1	NaN	0.20519	0.726931	-0.158231
29.0782	28.5587	26.9998	27.1458	27.2153	27.5129	27.1752	27.2045	26.0536	26.4164	27.8745	27.6094	NaN	NaN	NaN	NaN	NaN	NaN	NaN	NaN	NaN	27.2099	27.0129	NaN	0.771085	0.889171	NaN	12	12	50.4	0	30.33	53	biological regulation;defense response;defense response to virus;immune effector process;immune response;immune system process;innate immune response;interaction with host;interspecies interaction between organisms;multi-organism process;positive regulation of biological process;positive regulation of cell communication;positive regulation of cellular process;positive regulation of cytokine-media…	adenosine deaminase activity;binding;catalytic activity;deaminase activity;DNA binding;double-stranded RNA adenosine deaminase activity;hydrolase activity;hydrolase activity, acting on carbon-nitrogen (but not peptide) bonds;hydrolase activity, acting on carbon-nitrogen (but not peptide) bonds, in cyclic amidines;left-handed Z-DNA binding;nucleic acid binding;RNA binding;structure-specific DNA bi…	cell part;cytoplasm;cytoplasmic part;cytosol;intracellular membrane-bounded organelle;intracellular organelle;intracellular part;membrane-bounded organelle;nucleus;organelle	Cytosolic DNA-sensing pathway					0	1	NaN	0	1	NaN	0.625451	0.238711	-0.62282
31.7108	31.7407	30.3901	30.067	30.2577	30.473	29.615	29.7781	29.922	29.9758	31.2309	31.0884	30.2216	29.7213	28.6095	28.518	29.4225	29.0454	29.4691	NaN	26.9326	30.3239	29.9489	29.234	0.807899	0.992791	1.20491	26	26	46.5	0	60.062	283		binding;nucleic acid binding;nucleotide binding;RNA binding;translation factor activity, nucleic acid binding;translation initiation factor activity		mTOR signaling pathway;RNA transport	+			CTX_WT	1.94023	0.0162243	1.78663	1.01754	0.143657	1.19354	0.675538	0.220701	-0.593097
NaN	NaN	NaN	NaN	NaN	NaN	NaN	NaN	NaN	NaN	NaN	NaN	NaN	NaN	NaN	NaN	NaN	NaN	28.8678	NaN	NaN	NaN	NaN	28.8678	NaN	NaN	NaN	1	1	1.6	0.0079549	0.37365	4	anatomical structure development;cell differentiation;cell projection organization;cellular component organization;cellular component organization at cellular level;cellular component organization or biogenesis;cellular component organization or biogenesis at cellular level;cellular developmental process;cellular localization;cellular macromolecule localization;cellular process;cellular process i…		adherens junction;anchoring junction;axoneme;cell junction;cell part;cell projection;cell projection part;cell-cell junction;cilium;cilium axoneme;cilium part;cytoskeleton;intracellular non-membrane-bounded organelle;intracellular organelle;intracellular organelle part;intracellular part;motile cilium;non-membrane-bounded organelle;nonmotile primary cilium;occluding junction;organelle;organelle p…						0	1	NaN	0	1	NaN	-4.34294e-08	1	0
NaN	NaN	25.6956	25.4669	25.1497	25.1873	25.8711	26.1082	NaN	25.3732	NaN	NaN	NaN	25.3592	25.5292	26.2597	NaN	NaN	NaN	NaN	NaN	25.5812	25.4512	NaN	0.381914	0.426606	NaN	11	7	10.7	0	4.8098	29	actin cytoskeleton organization;actin filament-based process;biological regulation;cellular component organization;cellular component organization at cellular level;cellular component organization or biogenesis;cellular component organization or biogenesis at cellular level;cellular process;cortical actin cytoskeleton organization;cortical cytoskeleton organization;cytoskeleton organization;organ…		cell part;cytoplasm;intracellular part						0	1	NaN	0	1	NaN	0.0708562	0.977213	0.0505255
NaN	NaN	NaN	NaN	24.8637	NaN	NaN	NaN	NaN	NaN	NaN	NaN	NaN	NaN	NaN	NaN	NaN	NaN	NaN	NaN	NaN	24.8637	NaN	NaN	NaN	NaN	NaN	4	4	11.7	0.008089	0.36747	7	cellular component assembly;cellular component assembly at cellular level;cellular component biogenesis;cellular component organization;cellular component organization at cellular level;cellular component organization or biogenesis;cellular component organization or biogenesis at cellular level;cellular macromolecular complex assembly;cellular macromolecular complex subunit organization;cellular …	catalytic activity;methyltransferase activity;transferase activity;transferase activity, transferring one-carbon groups	cell part;cytoplasmic part;extrinsic to membrane;extrinsic to mitochondrial inner membrane;extrinsic to organelle membrane;intracellular membrane-bounded organelle;intracellular organelle;intracellular organelle part;intracellular part;membrane part;membrane-bounded organelle;mitochondrial membrane part;mitochondrial part;mitochondrion;organelle;organelle part						0	1	NaN	-4.34294e-08	1	0	0	1	NaN
NaN	NaN	25.1233	26.0896	NaN	NaN	NaN	NaN	NaN	NaN	NaN	NaN	NaN	NaN	NaN	NaN	NaN	NaN	NaN	NaN	NaN	25.6065	NaN	NaN	0.683271	NaN	NaN	5	2	24.7	0	5.2028	8	anatomical structure development;anatomical structure morphogenesis;appendage morphogenesis;artery morphogenesis;biological regulation;blood vessel morphogenesis;cartilage development;developmental process;embryonic appendage morphogenesis;embryonic cranial skeleton morphogenesis;embryonic limb morphogenesis;embryonic morphogenesis;embryonic organ morphogenesis;embryonic skeletal system morphogen…	binding;DNA binding;nucleic acid binding;nucleic acid binding transcription factor activity;sequence-specific DNA binding;sequence-specific DNA binding transcription factor activity	cell part;intracellular membrane-bounded organelle;intracellular organelle;intracellular part;membrane-bounded organelle;nucleus;organelle						0	1	NaN	-4.34294e-08	1	0	0	1	NaN
NaN	NaN	NaN	NaN	24.5207	24.6333	NaN	NaN	NaN	NaN	NaN	NaN	NaN	NaN	NaN	NaN	NaN	NaN	NaN	NaN	NaN	24.577	NaN	NaN	0.0796272	NaN	NaN	6	6	14.9	0	2.8598	9			cell part;cytoplasmic part;intracellular membrane-bounded organelle;intracellular organelle;intracellular part;membrane-bounded organelle;mitochondrion;organelle						0	1	NaN	-4.34294e-08	1	0	0	1	NaN
25.409	24.7559	24.5571	24.0499	24.4908	NaN	NaN	NaN	NaN	NaN	NaN	NaN	NaN	NaN	NaN	NaN	NaN	NaN	NaN	NaN	NaN	24.5571	NaN	NaN	0.495314	NaN	NaN	5	5	7.8	0	6.3792	13	biological regulation;biosynthetic process;cell fate commitment;cell fate commitment involved in formation of primary germ layers;cell surface receptor linked signaling pathway;cellular biosynthetic process;cellular component organization;cellular component organization at cellular level;cellular component organization or biogenesis;cellular component organization or biogenesis at cellular level;…	binding;DNA binding;nucleic acid binding;single-stranded DNA binding;structure-specific DNA binding	Cdc73/Paf1 complex;cell part;intracellular non-membrane-bounded organelle;intracellular organelle;intracellular organelle part;intracellular part;macromolecular complex;non-membrane-bounded organelle;nuclear part;nucleolus;nucleoplasm part;organelle;organelle part;protein complex;transcription elongation factor complex						0	1	NaN	-4.34294e-08	1	0	0	1	NaN
NaN	NaN	NaN	NaN	NaN	NaN	25.8591	25.6616	NaN	NaN	NaN	NaN	NaN	NaN	25.2519	24.9332	NaN	NaN	NaN	NaN	NaN	25.7604	25.0926	NaN	0.139632	0.225333	NaN	6	6	11.4	0	4.6524	14	cellular component organization;cellular component organization or biogenesis;cellular membrane organization;cellular process;endocytosis;establishment of localization;membrane invagination;membrane organization;transport;vesicle-mediated transport	binding;lipid binding	cell cortex;cell part;coated pit;cytoplasmic membrane-bounded vesicle;cytoplasmic part;cytoplasmic vesicle;cytoskeleton;intracellular membrane-bounded organelle;intracellular non-membrane-bounded organelle;intracellular organelle;intracellular part;lysosome;lytic vacuole;membrane;membrane part;membrane-bounded organelle;membrane-bounded vesicle;non-membrane-bounded organelle;organelle;plasma memb…						0	1	NaN	0	1	NaN	1.15149	0.0788733	-0.6678
24.5949	24.0658	NaN	NaN	NaN	NaN	NaN	NaN	NaN	NaN	NaN	NaN	NaN	NaN	NaN	NaN	NaN	NaN	NaN	NaN	NaN	24.3303	NaN	NaN	0.374109	NaN	NaN	4	4	7.3	0	4.8557	7	anatomical structure development;biological regulation;biosynthetic process;cell differentiation;cellular biosynthetic process;cellular developmental process;cellular macromolecule biosynthetic process;cellular macromolecule metabolic process;cellular metabolic process;cellular nitrogen compound metabolic process;cellular process;cellular response to chemical stimulus;cellular response to oxidati…	aryl hydrocarbon receptor activity;binding;DNA binding;molecular transducer activity;nucleic acid binding;nucleic acid binding transcription factor activity;protein binding transcription factor activity;receptor activity;sequence-specific distal enhancer binding RNA polymerase II transcription factor activity;sequence-specific DNA binding;sequence-specific DNA binding RNA polymerase II transcript…	cell part;cytoplasm;intracellular organelle part;intracellular part;macromolecular complex;nuclear part;nucleoplasm part;organelle part;protein complex;transcription factor complex	Pathways in cancer;Renal cell carcinoma					0	1	NaN	-4.34294e-08	1	0	0	0.960515	NaN
NaN	NaN	25.3695	25.5767	25.3655	NaN	NaN	NaN	NaN	NaN	NaN	NaN	NaN	NaN	NaN	NaN	NaN	NaN	NaN	NaN	NaN	25.3695	NaN	NaN	0.120801	NaN	NaN	6	6	7.7	0	10.997	13	adenohypophysis morphogenesis;alcohol metabolic process;amine metabolic process;anatomical structure development;anatomical structure morphogenesis;benzene-containing compound metabolic process;biological regulation;biomineral tissue development;bone mineralization;carboxylic acid metabolic process;cell surface receptor linked signaling pathway;cellular amine metabolic process;cellular amino acid…	antioxidant activity;binding;calcium ion binding;catalytic activity;cation binding;heme binding;ion binding;iron ion binding;metal ion binding;NAD(P)H oxidase activity;oxidoreductase activity;oxidoreductase activity, acting on NADH or NADPH;oxidoreductase activity, acting on NADH or NADPH, oxygen as acceptor;oxidoreductase activity, acting on peroxide as acceptor;peroxidase activity;tetrapyrrole …	cell part;integral to membrane;intrinsic to membrane;membrane;membrane part;plasma membrane						0	1	NaN	-4.34294e-08	1	0	0	1	NaN
26.435	26.9993	NaN	NaN	NaN	NaN	NaN	24.4722	26.403	25.3617	25.8689	26.066	26.202	26.2679	28.3569	28.8672	27.53	NaN	25.8964	28.8872	28.9897	26.435	26.235	28.2086	1.32649	1.24462	1.44812	63	6	24.1	0	2.2997	36	actin cytoskeleton organization;actin filament organization;actin filament-based process;actomyosin structure organization;biological regulation;cardiac muscle thin filament assembly;cellular component organization;cellular component organization at cellular level;cellular component organization or biogenesis;cellular component organization or biogenesis at cellular level;cellular process;cytoske…	binding;cytoskeletal protein binding;protein binding	actin filament bundle;actomyosin;cell part;contractile fiber part;cytoplasm;cytoplasmic part;cytoskeletal part;intracellular organelle part;intracellular part;macromolecular complex;organelle part;protein complex;stress fiber;striated muscle thin filament;Z disc						0.844309	0.223168	-1.85701	0.741466	0.267017	-1.15161	0.365721	0.424775	0.705403
26.2718	26.4391	26.5584	26.2136	26.2843	26.2878	26.976	NaN	NaN	NaN	26.3916	NaN	NaN	NaN	NaN	NaN	NaN	NaN	NaN	26.2637	NaN	26.2878	26.3916	26.2637	0.267049	NaN	NaN	7	7	15.7	0	7.0096	24			cell part;integral to membrane;intrinsic to membrane;membrane part						0	1	0.169295	0	1	0.127859	0	1	-0.0414363
NaN	NaN	NaN	23.3856	NaN	NaN	NaN	NaN	25.3934	25.2418	NaN	NaN	NaN	NaN	NaN	NaN	NaN	NaN	NaN	NaN	NaN	23.3856	25.3176	NaN	NaN	0.107141	NaN	5	5	10.2	0	2.4062	9	alcohol metabolic process;carbohydrate metabolic process;cellular carbohydrate metabolic process;cellular metabolic process;cellular process;glucose metabolic process;hexose metabolic process;metabolic process;monosaccharide metabolic process;primary metabolic process;small molecule metabolic process	alpha-glucosidase activity;binding;carbohydrate binding;catalytic activity;glucosidase activity;hydrolase activity;hydrolase activity, acting on glycosyl bonds;hydrolase activity, hydrolyzing O-glycosyl compounds		Galactose metabolism;Starch and sucrose metabolism					0	1	NaN	0	1	NaN	0	1	1.93199
NaN	NaN	NaN	NaN	NaN	NaN	NaN	NaN	NaN	NaN	NaN	NaN	NaN	NaN	NaN	NaN	NaN	NaN	24.9557	NaN	NaN	NaN	NaN	24.9557	NaN	NaN	NaN	3	3	7.7	0	2.5339	12	acetate biosynthetic process;acetate metabolic process;acetyl-CoA biosynthetic process;acetyl-CoA metabolic process;biosynthetic process;carboxylic acid biosynthetic process;carboxylic acid metabolic process;cellular biosynthetic process;cellular ketone metabolic process;cellular metabolic process;cellular process;coenzyme biosynthetic process;coenzyme metabolic process;cofactor biosynthetic proc…	acetate-CoA ligase activity;acid-thiol ligase activity;adenyl nucleotide binding;adenyl ribonucleotide binding;ATP binding;binding;catalytic activity;CoA-ligase activity;ligase activity;ligase activity, forming carbon-sulfur bonds;nucleotide binding;purine nucleotide binding;purine ribonucleoside triphosphate binding;purine ribonucleotide binding;ribonucleotide binding	cell part;cytoplasm;intracellular membrane-bounded organelle;intracellular organelle;intracellular part;membrane-bounded organelle;nucleus;organelle	Carbon fixation pathways in prokaryotes;Glycolysis / Gluconeogenesis;Methane metabolism;Propanoate metabolism;Pyruvate metabolism					0	1	NaN	0	1	NaN	-4.34294e-08	1	0
NaN	NaN	NaN	NaN	NaN	NaN	NaN	NaN	NaN	NaN	NaN	NaN	NaN	NaN	NaN	NaN	NaN	NaN	NaN	25.537	NaN	NaN	NaN	25.537	NaN	NaN	NaN	19	4	7.3	0	2.1916	4		adenyl nucleotide binding;adenyl ribonucleotide binding;ATP binding;binding;catalytic activity;hydrolase activity;hydrolase activity, acting on acid anhydrides;hydrolase activity, acting on acid anhydrides, in phosphorus-containing anhydrides;motor activity;nucleoside-triphosphatase activity;nucleotide binding;purine nucleotide binding;purine ribonucleoside triphosphate binding;purine ribonucleot…	cell part;cytoskeletal part;intracellular organelle part;intracellular part;macromolecular complex;membrane;myosin complex;myosin filament;organelle part;protein complex	Tight junction;Viral myocarditis					0	1	NaN	0	1	NaN	-4.34294e-08	1	0
25.9946	26.9252	26.0553	25.3128	26.6339	26.372	26.7465	26.1092	NaN	NaN	NaN	NaN	NaN	NaN	25.291	NaN	NaN	NaN	NaN	NaN	NaN	26.2406	25.291	NaN	0.515926	NaN	NaN	8	8	14	0	10.379	29	cellular macromolecule metabolic process;cellular metabolic process;cellular process;cellular protein metabolic process;macromolecule metabolic process;macromolecule modification;metabolic process;peptidyl-amino acid modification;peptidyl-proline modification;primary metabolic process;protein folding;protein metabolic process;protein modification process;protein peptidyl-prolyl isomerization	catalytic activity;cis-trans isomerase activity;isomerase activity;peptidyl-prolyl cis-trans isomerase activity	cell part;cytoplasm;intracellular membrane-bounded organelle;intracellular organelle;intracellular organelle part;intracellular part;membrane-bounded organelle;nuclear body;nuclear matrix;nuclear part;nuclear speck;nucleoplasm part;nucleus;organelle;organelle part						0	1	NaN	0	1	NaN	0	1	-0.9777
28.3372	28.8602	28.9985	29.3255	29.5789	29.6462	29.3554	29.106	29.3254	29.1447	28.6205	28.4379	29.7296	29.909	30.4028	30.497	29.5329	29.6767	29.9751	30.8302	30.3406	29.2157	29.5275	29.9751	0.426401	0.764096	0.525185	27	27	51.4	0	69.191	261	actin filament-based movement;actin filament-based process;biological regulation;cellular component movement;cellular localization;cellular process;centrosome localization;establishment of localization;establishment of localization in cell;establishment of nucleus localization;establishment of organelle localization;localization;nuclear migration;nuclear migration along microfilament;organelle lo…		cell part;chromosomal part;chromosome;chromosome, telomeric region;condensed chromosome;condensed nuclear chromosome;cytoplasmic part;endosomal part;endosome membrane;envelope;integral to membrane;intracellular non-membrane-bounded organelle;intracellular organelle;intracellular organelle part;intracellular part;intrinsic to membrane;membrane;membrane part;non-membrane-bounded organelle;nuclear c…		+			CTX_WT	2.28282	0.0191377	-0.920129	0.748306	0.341755	-0.562755	0.572915	0.327785	0.357374
27.7636	28.3702	28.6562	28.8596	28.2238	28.2818	28.6134	28.7838	28.1569	28.0215	28.4011	28.1379	28.0356	28.2783	27.6379	27.1879	28.0819	27.6129	27.0783	26.811	NaN	28.4918	28.0867	27.3456	0.359579	0.39129	0.565893	18	17	37.1	0	32.509	148	biosynthetic process;establishment of localization;lipid biosynthetic process;lipid metabolic process;metabolic process;primary metabolic process;steroid biosynthetic process;steroid metabolic process;transport	binding;carboxylic acid binding;coenzyme binding;cofactor binding;fatty acid binding;fatty-acyl-CoA binding;lipid binding;monocarboxylic acid binding	cell part;cytoplasmic part;Golgi apparatus part;Golgi membrane;integral to membrane;intracellular membrane-bounded organelle;intracellular organelle;intracellular organelle part;intracellular part;intrinsic to membrane;membrane;membrane part;membrane-bounded organelle;mitochondrion;organelle;organelle membrane;organelle part		+			CTX_WT	2.57229	0.00963927	1.04802	1.22385	0.152777	0.5861	1.5593	0.0690065	-0.461921
NaN	NaN	NaN	NaN	NaN	NaN	NaN	24.5411	NaN	NaN	NaN	NaN	NaN	NaN	NaN	NaN	NaN	NaN	NaN	NaN	NaN	24.5411	NaN	NaN	NaN	NaN	NaN	5	4	34.8	0	1.4045	6	biological regulation;cellular component organization;cellular component organization at cellular level;cellular component organization or biogenesis;cellular component organization or biogenesis at cellular level;cellular membrane organization;cellular process;cellular response to stimulus;endocytosis;endosome organization;establishment of localization;establishment of protein localization;intra…	binding;catalytic activity;GDP binding;GTP binding;GTPase activity;guanyl nucleotide binding;guanyl ribonucleotide binding;hydrolase activity;hydrolase activity, acting on acid anhydrides;hydrolase activity, acting on acid anhydrides, in phosphorus-containing anhydrides;nucleoside-triphosphatase activity;nucleotide binding;purine nucleotide binding;purine ribonucleoside triphosphate binding;purin…	actin cytoskeleton;cell part;cell projection;cytoplasmic membrane-bounded vesicle;cytoplasmic part;cytoplasmic vesicle;cytoplasmic vesicle membrane;cytoplasmic vesicle part;cytoskeleton;early endosome;endocytic vesicle;endocytic vesicle membrane;endosomal part;endosome;endosome membrane;intracellular membrane-bounded organelle;intracellular non-membrane-bounded organelle;intracellular organelle;i…	Endocytosis					0	1	NaN	-4.34294e-08	1	0	0	1	NaN
NaN	NaN	26.3489	26.1152	26.4167	26.1255	27.6688	26.9083	NaN	NaN	NaN	NaN	NaN	NaN	NaN	NaN	NaN	NaN	NaN	NaN	NaN	26.3828	NaN	NaN	0.599007	NaN	NaN	20	20	9.8	0	18.437	38	biological regulation;positive regulation of biological process;positive regulation of biosynthetic process;positive regulation of cellular biosynthetic process;positive regulation of cellular metabolic process;positive regulation of cellular process;positive regulation of gene expression;positive regulation of macromolecule biosynthetic process;positive regulation of macromolecule metabolic proc…	adenyl nucleotide binding;adenyl ribonucleotide binding;ATP binding;binding;catalytic activity;helicase activity;hydrolase activity;hydrolase activity, acting on acid anhydrides;hydrolase activity, acting on acid anhydrides, in phosphorus-containing anhydrides;hydrolase activity, acting on ester bonds;ligand-dependent nuclear receptor transcription coactivator activity;nuclease activity;nucleic a…							0	1	NaN	-4.34294e-08	1	0	0	1	NaN
28.1236	NaN	27.8473	NaN	27.4028	NaN	NaN	NaN	28.152	NaN	NaN	NaN	28.9541	NaN	NaN	NaN	NaN	NaN	27.3255	NaN	NaN	27.8473	28.553	27.3255	0.363619	0.567183	NaN	1	1	0.7	0.0084941	0.35634	14	biological adhesion;biological regulation;cell adhesion;cell junction assembly;cell junction organization;cell-cell junction assembly;cell-cell junction organization;cellular component assembly;cellular component assembly at cellular level;cellular component organization;cellular component organization at cellular level;cellular component organization or biogenesis;cellular component organization…		anchoring junction;cell junction;cell part;cell-cell contact zone;cell-cell junction;cytoplasmic part;cytoskeletal part;desmosome;internal side of plasma membrane;intracellular non-membrane-bounded organelle;intracellular organelle;intracellular organelle part;intracellular part;membrane part;midbody;mitotic spindle;non-membrane-bounded organelle;organelle;organelle part;perinuclear region of cyt…						0	1	0.465707	0	1	1.22749	0.808346	0.147932	0.761784
NaN	NaN	NaN	NaN	NaN	NaN	NaN	22.527	NaN	NaN	NaN	NaN	NaN	NaN	NaN	NaN	NaN	NaN	NaN	NaN	NaN	22.527	NaN	NaN	NaN	NaN	NaN	1	1	4	0.0079606	0.37803	3	activation of caspase activity;biological regulation;cellular process;cellular response to abiotic stimulus;cellular response to chemical stimulus;cellular response to corticosteroid stimulus;cellular response to dexamethasone stimulus;cellular response to endogenous stimulus;cellular response to glucocorticoid stimulus;cellular response to hormone stimulus;cellular response to light stimulus;cel…	binding;catalytic activity;cysteine-type endopeptidase activity;cysteine-type peptidase activity;endopeptidase activity;enzyme binding;hydrolase activity;kinase binding;peptidase activity;peptidase activity, acting on L-amino acid peptides;protein binding;protein domain specific binding;protein kinase binding;SH3 domain binding	apoptosome;cell part;cytoplasmic part;cytosol;cytosolic part;intracellular membrane-bounded organelle;intracellular organelle;intracellular part;macromolecular complex;membrane-bounded organelle;nucleus;organelle;protein complex	Alzheimer's disease;Amyotrophic lateral sclerosis (ALS);Apoptosis;Colorectal cancer;Endometrial cancer;Huntington's disease;ko05152;Non-small cell lung cancer;p53 signaling pathway;Pancreatic cancer;Parkinson's disease;Pathways in cancer;Prostate cancer;Small cell lung cancer;Toxoplasmosis;VEGF signaling pathway;Viral myocarditis					0	1	NaN	-4.34294e-08	1	0	0	1	NaN
26.5501	NaN	29.0463	28.7568	27.9847	27.7519	29.3164	29.5429	28.1686	28.2395	27.5709	27.9629	28.1409	28.2493	28.3282	28.6965	28.0185	27.9569	27.7037	28.779	27.1898	28.7568	28.204	27.9569	1.05693	0.319835	0.576282	25	25	25.4	0	16.352	89	actin cytoskeleton organization;actin filament-based process;actin polymerization-dependent cell motility;activation of immune response;ameboidal cell migration;anatomical structure development;anatomical structure formation involved in morphogenesis;anatomical structure morphogenesis;anterior/posterior axis specification;anterior/posterior axis specification, embryo;anterior/posterior pattern sp…	binding;enzyme activator activity;enzyme regulator activity;GTPase activator activity;GTPase regulator activity;kinase activator activity;kinase regulator activity;nucleoside-triphosphatase regulator activity;protein binding;protein complex binding;protein kinase activator activity;protein kinase regulator activity;Rac GTPase activator activity;Ras GTPase activator activity;Rho GTPase activator a…	cell part;cell projection;cell projection membrane;cell projection part;cytoplasm;cytoplasmic part;cytosol;integral to membrane;intracellular part;intrinsic to membrane;lamellipodium;lamellipodium membrane;leading edge membrane;macromolecular complex;membrane part;plasma membrane part;protein complex;SCAR complex	Regulation of actin cytoskeleton					0.43088	0.774187	0.491735	0.456273	0.726598	0.240038	0.274975	0.6008	-0.251697
28.539	28.9762	29.9397	30.1632	30.0132	29.9127	30.1128	29.9758	29.0892	29.4929	29.5692	29.4909	28.9858	28.8324	29.2292	29.3733	29.7781	28.3544	28.3549	28.6233	27.9319	29.9578	29.3013	28.3549	0.601617	0.268374	0.69908	29	29	49	0	66.759	232	amine metabolic process;amino acid activation;asparaginyl-tRNA aminoacylation;carboxylic acid metabolic process;cellular amine metabolic process;cellular amino acid metabolic process;cellular ketone metabolic process;cellular macromolecule metabolic process;cellular metabolic process;cellular nitrogen compound metabolic process;cellular process;macromolecule metabolic process;metabolic process;nc…	adenyl nucleotide binding;adenyl ribonucleotide binding;aminoacyl-tRNA ligase activity;asparagine-tRNA ligase activity;ATP binding;binding;catalytic activity;ligase activity;ligase activity, forming aminoacyl-tRNA and related compounds;ligase activity, forming carbon-oxygen bonds;nucleic acid binding;nucleotide binding;purine nucleotide binding;purine ribonucleoside triphosphate binding;purine ri…	cell part;cytoplasmic part;intracellular membrane-bounded organelle;intracellular organelle;intracellular part;membrane-bounded organelle;mitochondrion;organelle	Aminoacyl-tRNA biosynthesis	+			CTX_WT	1.92444	0.0267675	1.09553	1.45996	0.0949336	0.649322	1.11898	0.125019	-0.44621
NaN	NaN	NaN	NaN	NaN	NaN	NaN	21.5555	NaN	NaN	NaN	NaN	NaN	NaN	NaN	NaN	NaN	NaN	NaN	NaN	NaN	21.5555	NaN	NaN	NaN	NaN	NaN	2	2	1.3	0.0041328	0.46218	1									0	1	NaN	-4.34294e-08	1	0	0	1	NaN
30.0024	29.6476	29.0857	29.3831	29.2508	29.1842	29.0718	29.2766	29.3322	29.6415	30.033	30.0044	29.2008	29.5044	30.0723	29.9824	30.6103	30.4364	30.4309	29.5381	30.1367	29.2637	29.812	30.4309	0.317099	0.347301	0.422802	16	16	72.5	0	39.366	232		binding;calcium ion binding;cation binding;ion binding;metal ion binding	cell part;cytoplasmic part;endoplasmic reticulum lumen;endoplasmic reticulum part;intracellular organelle lumen;intracellular organelle part;intracellular part;membrane-enclosed lumen;organelle lumen;organelle part		+			CTX_WT	2.85589	0.00906821	-0.867731	1.4315	0.132893	-0.509123	1.31071	0.123598	0.358608
30.5093	30.8712	30.4917	30.8328	30.6645	30.7031	30.888	30.8182	30.4052	30.6216	30.2215	30.4673	30.8754	30.9267	31.276	31.3569	30.7719	30.9255	31.3956	31.6603	32.061	30.7607	30.7485	31.3956	0.157345	0.411232	0.528538	52	0	68.4	0	75.532	535	biological regulation;calcium ion homeostasis;cation homeostasis;cellular calcium ion homeostasis;cellular cation homeostasis;cellular chemical homeostasis;cellular divalent inorganic cation homeostasis;cellular homeostasis;cellular ion homeostasis;cellular metal ion homeostasis;cellular process;chemical homeostasis;divalent inorganic cation homeostasis;homeostatic process;ion homeostasis;metal i…		cell part;cytoplasmic part;integral to membrane;intracellular membrane-bounded organelle;intracellular organelle;intracellular organelle part;intracellular part;intrinsic to membrane;membrane;membrane part;membrane-bounded organelle;mitochondrial inner membrane;mitochondrial membrane;mitochondrial part;mitochondrion;organelle;organelle inner membrane;organelle membrane;organelle part		+			CTX_WT	2.13464	0.0429806	-0.640514	1.35982	0.123515	-0.594051	0.113661	0.932533	0.046463
25.1337	NaN	NaN	NaN	24.6873	24.1025	NaN	NaN	NaN	NaN	NaN	NaN	NaN	NaN	NaN	NaN	NaN	NaN	NaN	NaN	NaN	24.6873	NaN	NaN	0.517169	NaN	NaN	4	4	9.6	0	7.0605	12									0	1	NaN	-4.34294e-08	1	0	0	1	NaN
NaN	NaN	NaN	NaN	NaN	NaN	NaN	NaN	NaN	NaN	NaN	NaN	NaN	NaN	NaN	25.0924	NaN	NaN	NaN	NaN	NaN	NaN	25.0924	NaN	NaN	NaN	NaN	1	1	1.6	0.0064149	0.41092	5		active transmembrane transporter activity;amine transmembrane transporter activity;amino acid transmembrane transporter activity;carboxylic acid transmembrane transporter activity;L-amino acid transmembrane transporter activity;neutral amino acid transmembrane transporter activity;organic acid transmembrane transporter activity;substrate-specific transmembrane transporter activity;substrate-speci…	cell part;integral to membrane;integral to plasma membrane;intrinsic to membrane;intrinsic to plasma membrane;membrane part;plasma membrane part						-4.34294e-08	1	0	0	1	NaN	0	1	NaN
NaN	27.8293	28.2791	28.3931	28.4679	28.0596	28.7923	28.7874	28.3784	28.4624	27.3427	26.2362	28.0474	28.163	28.9677	29.0123	NaN	27.2301	25.7033	NaN	NaN	28.3931	28.2707	26.4667	0.355807	0.913664	1.07963	24	19	37.9	0	19.86	101	biological regulation;biosynthetic process;catabolic process;cell differentiation;cellular biosynthetic process;cellular catabolic process;cellular developmental process;cellular macromolecule biosynthetic process;cellular macromolecule catabolic process;cellular macromolecule metabolic process;cellular metabolic process;cellular nitrogen compound metabolic process;cellular process;developmental …	binding;catalytic activity;cation binding;endonuclease activity;endonuclease activity, active with either ribo- or deoxyribonucleic acids and producing 5'-phosphomonoesters;endoribonuclease activity;endoribonuclease activity, cleaving siRNA-paired mRNA;endoribonuclease activity, producing 5'-phosphomonoesters;hydrolase activity;hydrolase activity, acting on ester bonds;ion binding;metal ion bindi…	cell part;cytoplasmic mRNA processing body;cytoplasmic part;intracellular membrane-bounded organelle;intracellular non-membrane-bounded organelle;intracellular organelle;intracellular part;macromolecular complex;membrane-bounded organelle;micro-ribonucleoprotein complex;mRNA cap binding complex;non-membrane-bounded organelle;nucleus;organelle;polysome;protein complex;ribonucleoprotein complex;RNA…		+			CTX_WT	2.57014	0.00432109	1.90596	1.21234	0.0770982	1.60955	0.360428	0.500766	-0.296403
28.9634	28.6455	29.6184	29.3417	29.1424	29.4451	29.4752	29.311	29.1572	28.9347	28.599	28.9629	29.1005	28.9486	28.5076	28.3373	28.5863	28.76	28.5088	27.0326	NaN	29.3263	28.9416	28.5476	0.31517	0.298067	0.799841	29	29	50.9	0	58.112	250	biosynthetic process;carbohydrate biosynthetic process;carbohydrate metabolic process;cellular biosynthetic process;cellular carbohydrate biosynthetic process;cellular carbohydrate metabolic process;cellular lipid metabolic process;cellular macromolecule biosynthetic process;cellular macromolecule metabolic process;cellular metabolic process;cellular polysaccharide biosynthetic process;cellular p…	catalytic activity;galactosyltransferase activity;procollagen galactosyltransferase activity;transferase activity;transferase activity, transferring glycosyl groups;transferase activity, transferring hexosyl groups;UDP-galactosyltransferase activity;UDP-glycosyltransferase activity	cell part;cytoplasmic part;endoplasmic reticulum lumen;endoplasmic reticulum part;intracellular organelle lumen;intracellular organelle part;intracellular part;membrane-enclosed lumen;organelle lumen;organelle part	Lysine degradation;Other types of O-glycan biosynthesis	+			CTX_WT	2.06711	0.0224148	1.02091	1.08569	0.185954	0.596556	1.82002	0.0580223	-0.424353
27.0721	26.6048	25.7954	27.2587	26.4371	26.9796	26.5514	26.4695	26.5298	26.636	26.5822	26.2392	27.9268	28.0385	28.3067	28.1149	27.5843	27.8303	27.3876	28.4165	28.0489	26.5781	27.2814	27.8303	0.45939	0.869339	0.401665	7	7	41.5	0	7.3529	102	cellular component assembly;cellular component assembly at cellular level;cellular component biogenesis;cellular component organization;cellular component organization at cellular level;cellular component organization or biogenesis;cellular component organization or biogenesis at cellular level;cellular macromolecular complex assembly;cellular macromolecular complex subunit organization;cellular …	4 iron, 4 sulfur cluster binding;binding;catalytic activity;cation binding;electron carrier activity;ion binding;iron-sulfur cluster binding;metal cluster binding;metal ion binding;NADH dehydrogenase (quinone) activity;NADH dehydrogenase (ubiquinone) activity;NADH dehydrogenase activity;oxidoreductase activity;oxidoreductase activity, acting on NADH or NADPH;oxidoreductase activity, acting on NAD…	cell part;cytoplasmic part;intracellular membrane-bounded organelle;intracellular organelle;intracellular organelle part;intracellular part;macromolecular complex;membrane part;membrane-bounded organelle;mitochondrial membrane part;mitochondrial part;mitochondrial respiratory chain complex I;mitochondrion;NADH dehydrogenase complex;organelle;organelle part;protein complex;respiratory chain comple…	Alzheimer's disease;Huntington's disease;Oxidative phosphorylation;Parkinson's disease	+			CTX_WT	3.27196	0.00237126	-1.20743	0.676541	0.390262	-0.556751	1.08468	0.0969904	0.650675
30.8728	30.9187	30.0556	29.8594	29.4688	29.7856	29.5463	29.6746	29.6675	29.2078	30.5924	30.3514	29.3979	29.1438	29.0055	28.7898	29.4146	29.4305	28.9757	NaN	NaN	29.8225	29.3028	29.4146	0.568748	0.645291	0.258158	10	3	50.9	0	24.764	205			cell part;cytoplasmic part;intracellular part;perinuclear region of cytoplasm						1.2172	0.147731	0.749102	0.261189	0.93525	0.245897	0.919992	0.15404	-0.503205
26.7794	26.1336	27.2293	27.6285	27.9889	26.9281	28.1067	27.5674	27.0145	27.7262	26.2904	27.0431	27.8856	27.9916	28.5208	29.042	27.9174	27.6771	28.3751	29.5391	29.2001	27.3984	27.8059	28.3751	0.663268	0.884988	0.805181	12	12	39	0	12.897	70	amine catabolic process;amine metabolic process;branched chain family amino acid catabolic process;branched chain family amino acid metabolic process;carboxylic acid catabolic process;carboxylic acid metabolic process;catabolic process;cellular amine metabolic process;cellular amino acid catabolic process;cellular amino acid metabolic process;cellular catabolic process;cellular ketone metabolic p…	3-hydroxyisobutyryl-CoA hydrolase activity;catalytic activity;CoA hydrolase activity;hydrolase activity;hydrolase activity, acting on ester bonds;thiolester hydrolase activity	cell part;cytoplasmic part;intracellular membrane-bounded organelle;intracellular organelle;intracellular part;membrane-bounded organelle;mitochondrion;organelle	beta-Alanine metabolism;Propanoate metabolism;Valine, leucine and isoleucine degradation	+			CTX_WT	1.95271	0.0220118	-1.24653	0.963437	0.186131	-0.852472	0.480614	0.373774	0.394054
NaN	NaN	NaN	NaN	24.9479	NaN	25.4372	NaN	NaN	NaN	NaN	NaN	NaN	NaN	NaN	NaN	NaN	NaN	NaN	NaN	NaN	25.1926	NaN	NaN	0.346024	NaN	NaN	6	6	4.1	0	3.5143	10	biological regulation;cell communication;cellular process;cellular response to chemical stimulus;cellular response to external stimulus;cellular response to extracellular stimulus;cellular response to nutrient levels;cellular response to organic substance;cellular response to starvation;cellular response to stimulus;cellular response to stress;cellular response to topologically incorrect protein;…	adenyl nucleotide binding;adenyl ribonucleotide binding;ATP binding;binding;catalytic activity;eukaryotic translation initiation factor 2alpha kinase activity;kinase activity;nucleotide binding;phosphotransferase activity, alcohol group as acceptor;protein kinase activity;protein serine/threonine kinase activity;purine nucleotide binding;purine ribonucleoside triphosphate binding;purine ribonucle…	cell part;cytoplasmic part;cytosolic part;cytosolic ribosome;intracellular non-membrane-bounded organelle;intracellular organelle;intracellular part;macromolecular complex;non-membrane-bounded organelle;organelle;ribonucleoprotein complex;ribosome	Hepatitis C;Measles;Protein processing in endoplasmic reticulum					0	1	NaN	-4.34294e-08	1	0	0	1	NaN
NaN	NaN	24.5992	NaN	NaN	NaN	24.6549	26.0475	NaN	NaN	NaN	NaN	NaN	NaN	NaN	NaN	NaN	NaN	NaN	NaN	NaN	24.6549	NaN	NaN	0.820585	NaN	NaN	1	1	5.3	0	1.1901	4	cell cycle phase;cell cycle process;cell division;cellular component organization;cellular component organization at cellular level;cellular component organization or biogenesis;cellular component organization or biogenesis at cellular level;cellular process;chromosome segregation;cytoskeleton organization;microtubule cytoskeleton organization;microtubule-based process;mitosis;mitotic spindle org…		cell part;chromosomal part;condensed chromosome kinetochore;intracellular membrane-bounded organelle;intracellular non-membrane-bounded organelle;intracellular organelle;intracellular organelle part;intracellular part;kinetochore;macromolecular complex;membrane-bounded organelle;Ndc80 complex;non-membrane-bounded organelle;nucleus;organelle;organelle part;protein complex						0	1	NaN	-4.34294e-08	1	0	0	1	NaN
NaN	NaN	NaN	NaN	26.1108	NaN	NaN	NaN	NaN	NaN	NaN	NaN	NaN	NaN	NaN	NaN	NaN	NaN	NaN	NaN	NaN	26.1108	NaN	NaN	NaN	NaN	NaN	4	4	20.7	0	5.4147	8	adaptation of signaling pathway;adult behavior;adult locomotory behavior;adult walking behavior;anatomical structure development;behavior;biological regulation;biosynthetic process;brain development;catabolic process;cell chemotaxis;cell migration;cell motility;cell surface receptor linked signaling pathway;cellular biosynthetic process;cellular catabolic process;cellular component movement;cellu…		basolateral plasma membrane;cell part;coated pit;cytoplasmic membrane-bounded vesicle;cytoplasmic part;cytoplasmic vesicle;cytoskeletal part;intracellular;intracellular membrane-bounded organelle;intracellular organelle;intracellular organelle part;intracellular part;membrane;membrane part;membrane-bounded organelle;membrane-bounded vesicle;nucleus;organelle;organelle part;plasma membrane part;po…	Chemokine signaling pathway;Endocytosis;MAPK signaling pathway;Phototransduction					0	0.729812	NaN	-4.34294e-08	1	0	0	0.712185	NaN
NaN	NaN	NaN	NaN	NaN	NaN	NaN	NaN	NaN	NaN	NaN	NaN	NaN	NaN	NaN	NaN	NaN	NaN	NaN	NaN	NaN	NaN	NaN	NaN	NaN	NaN	NaN	1	1	5	0.0080715	0.35961	1		acid-amino acid ligase activity;catalytic activity;ligase activity;ligase activity, forming carbon-nitrogen bonds;small conjugating protein ligase activity;ubiquitin-protein ligase activity	cell part;intracellular part;macromolecular complex;protein complex;ubiquitin ligase complex						-4.34294e-08	1	0	-4.34294e-08	1	0	-4.34294e-08	1	0
NaN	NaN	28.1074	28.6959	25.9205	28.4285	30.2363	29.2253	29.1134	NaN	NaN	28.709	NaN	28.8496	32.4759	32.2018	NaN	NaN	NaN	33.5544	32.8433	28.5622	29.1134	33.1989	1.43996	1.89672	0.502803	15	12	23.3	0	11.211	31	10-formyltetrahydrofolate catabolic process;10-formyltetrahydrofolate metabolic process;aromatic compound catabolic process;biosynthetic process;catabolic process;cellular aromatic compound metabolic process;cellular catabolic process;cellular metabolic process;cellular nitrogen compound catabolic process;cellular nitrogen compound metabolic process;cellular process;coenzyme catabolic process;coe…	catalytic activity;formyltetrahydrofolate dehydrogenase activity;hydroxymethyl-, formyl- and related transferase activity;methyltransferase activity;oxidoreductase activity;oxidoreductase activity, acting on the aldehyde or oxo group of donors;oxidoreductase activity, acting on the aldehyde or oxo group of donors, NAD or NADP as acceptor;oxidoreductase activity, acting on the CH-NH group of donor…	cell part;cytoplasmic part;intracellular membrane-bounded organelle;intracellular organelle;intracellular part;membrane-bounded organelle;mitochondrion;organelle	One carbon pool by folate	+			CTX_WT	2.33314	0.00319441	-4.76324	1.01694	0.104587	-2.92893	0.995401	0.0689757	1.83432
NaN	NaN	NaN	NaN	NaN	NaN	24.291	NaN	NaN	NaN	NaN	NaN	NaN	NaN	NaN	NaN	NaN	NaN	NaN	NaN	NaN	24.291	NaN	NaN	NaN	NaN	NaN	5	5	17.4	0	3.4928	8									0	1	NaN	-4.34294e-08	1	0	0	1	NaN
NaN	NaN	24.1924	NaN	NaN	NaN	25.2376	25.013	NaN	NaN	NaN	NaN	NaN	NaN	NaN	NaN	NaN	NaN	NaN	NaN	NaN	25.013	NaN	NaN	0.550211	NaN	NaN	6	6	13.1	0	4.0056	10	biological regulation;carboxylic acid metabolic process;cellular ketone metabolic process;cellular lipid metabolic process;cellular metabolic process;cellular process;cellular response to stimulus;fatty acid metabolic process;intracellular signal transduction;lipid metabolic process;metabolic process;monocarboxylic acid metabolic process;organic acid metabolic process;oxoacid metabolic process;pr…	acyl-CoA hydrolase activity;carboxylesterase activity;carboxylic ester hydrolase activity;catalytic activity;CoA hydrolase activity;hydrolase activity;hydrolase activity, acting on ester bonds;thiolester hydrolase activity	cell part;cytoplasm;intracellular part						0	1	NaN	-4.34294e-08	1	0	0	1	NaN
NaN	NaN	NaN	NaN	NaN	NaN	NaN	NaN	NaN	NaN	NaN	NaN	NaN	NaN	NaN	24.8439	NaN	NaN	NaN	NaN	26.6592	NaN	24.8439	26.6592	NaN	NaN	NaN	3	3	6.6	0	1.5854	3	actin cytoskeleton organization;actin filament-based process;actomyosin structure organization;autolysis;biological regulation;cell cycle arrest;cell cycle process;cell death;cellular component assembly;cellular component organization;cellular component organization at cellular level;cellular component organization or biogenesis;cellular component organization or biogenesis at cellular level;cell…	alkali metal ion binding;binding;calcium ion binding;calcium-dependent cysteine-type endopeptidase activity;catalytic activity;cation binding;cysteine-type endopeptidase activity;cysteine-type peptidase activity;cytoskeletal protein binding;endopeptidase activity;enzyme regulator activity;hydrolase activity;ion binding;ligase regulator activity;metal ion binding;peptidase activity;peptidase activ…	cell part;contractile fiber part;cytoplasmic part;cytosol;intracellular;intracellular membrane-bounded organelle;intracellular organelle;intracellular part;macromolecular complex;membrane part;membrane-bounded organelle;nucleus;organelle;organelle part;plasma membrane part;protein complex;T-tubule;Z disc						0	1	NaN	0	1	-1.81529	0	1	NaN
NaN	NaN	NaN	NaN	NaN	NaN	NaN	NaN	NaN	NaN	NaN	NaN	NaN	NaN	NaN	23.4955	NaN	NaN	NaN	NaN	NaN	NaN	23.4955	NaN	NaN	NaN	NaN	2	2	9.8	0	2.4214	2	cellular process;establishment of localization;transmembrane transport;transport		cell part;integral to membrane;intrinsic to membrane;membrane part						-4.34294e-08	1	0	0	1	NaN	0	1	NaN
25.7849	25.462	26.3542	25.2046	25.455	26.1329	26.3375	25.6751	25.6918	NaN	NaN	NaN	25.4833	25.6298	27.6923	27.5306	NaN	26.1494	26.2146	27.5014	27.8522	25.73	25.6918	26.858	0.432676	1.1049	0.875247	7	7	21.9	0	5.7924	25		catalytic activity;oxidoreductase activity	cell part;cytoplasmic part;intracellular membrane-bounded organelle;intracellular organelle;intracellular part;lipid particle;membrane-bounded organelle;midbody;mitochondrion;organelle		+			CTX_WT	1.92521	0.0257595	-1.12864	0.331662	0.762325	-0.523837	0.732628	0.195566	0.604804
26.4002	26.6583	26.5742	26.7038	26.7735	26.3766	27.1272	27.0937	26.3395	26.7378	26.8415	26.0637	26.4743	25.7938	NaN	26.6714	NaN	NaN	NaN	NaN	NaN	26.6811	26.4743	NaN	0.281199	0.380836	NaN	14	14	14.2	0	9.8985	52	anatomical structure development;biological regulation;cell cycle;cell development;cellular developmental process;cellular process;developmental process;megakaryocyte development;positive regulation of catalytic activity;positive regulation of GTPase activity;positive regulation of hydrolase activity;positive regulation of molecular function;positive regulation of Rab GTPase activity;positive reg…	enzyme activator activity;enzyme regulator activity;GTPase activator activity;GTPase regulator activity;nucleoside-triphosphatase regulator activity;Rab GTPase activator activity;Ras GTPase activator activity;small GTPase regulator activity	cell part;cytoplasmic part;cytoskeletal part;cytosol;early endosome;endosome;Golgi apparatus;intracellular membrane-bounded organelle;intracellular organelle;intracellular organelle part;intracellular part;membrane-bounded organelle;microtubule organizing center;nucleus;organelle;organelle part						0	1	NaN	0	1	NaN	0.968137	0.214743	-0.295998
25.4739	25.235	25.6351	26.0656	25.9192	26.2106	25.5786	26.06	NaN	NaN	NaN	NaN	NaN	NaN	NaN	NaN	NaN	NaN	NaN	NaN	NaN	25.7771	NaN	NaN	0.341539	NaN	NaN	9	4	23.1	0	4.0918	21									0	1	NaN	-4.34294e-08	1	0	0	1	NaN
NaN	26.1448	26.0531	NaN	25.9792	26.0803	NaN	NaN	25.7078	NaN	26.8278	27.1904	26.7199	26.3141	NaN	26.275	27.357	27.1107	27.0174	NaN	NaN	26.0667	26.517	27.1107	0.0685872	0.518646	0.175431	5	5	43.2	0	5.3197	34	anatomical structure morphogenesis;biological regulation;biosynthetic process;cell part morphogenesis;cellular biosynthetic process;cellular component morphogenesis;cellular component organization;cellular component organization at cellular level;cellular component organization or biogenesis;cellular component organization or biogenesis at cellular level;cellular developmental process;cellular ma…	binding;chromatin binding;DNA binding;nucleic acid binding;single-stranded DNA binding;structure-specific DNA binding	cell part;cytoplasmic part;intracellular membrane-bounded organelle;intracellular non-membrane-bounded organelle;intracellular organelle;intracellular organelle part;intracellular part;membrane-bounded organelle;mitochondrial nucleoid;mitochondrial part;mitochondrion;non-membrane-bounded organelle;nucleoid;organelle;organelle part	DNA replication;Homologous recombination;Mismatch repair	+			CTX_WT	4.09235	0.000897338	-1.09736	1.11179	0.16515	-0.655865	0.867679	0.181503	0.441491
NaN	NaN	NaN	NaN	NaN	NaN	24.8037	25.3546	NaN	NaN	NaN	NaN	NaN	NaN	NaN	NaN	NaN	NaN	NaN	NaN	NaN	25.0791	NaN	NaN	0.389581	NaN	NaN	26	2	33.1	0.0091691	0.33044	3	biological regulation;biosynthetic process;cellular biosynthetic process;cellular macromolecule biosynthetic process;cellular macromolecule metabolic process;cellular metabolic process;cellular nitrogen compound metabolic process;cellular process;chromatin silencing;chromatin silencing at rDNA;gene silencing;macromolecule biosynthetic process;macromolecule metabolic process;metabolic process;nega…	binding;DNA binding;nucleic acid binding	cell part;intracellular non-membrane-bounded organelle;intracellular organelle;intracellular organelle part;intracellular part;non-membrane-bounded organelle;nuclear part;nucleolus;organelle;organelle part						0	1	NaN	-4.34294e-08	1	0	0	1	NaN
27.6256	27.5362	28.7114	28.7264	27.9075	28.044	27.2468	27.0428	27.8027	28.674	27.0407	26.7712	27.7882	27.9515	27.276	26.0955	26.6366	26.8383	27.579	26.0087	NaN	27.7665	27.5321	26.7375	0.622781	0.799714	0.647162	6	6	46.4	0	13.217	74	biological regulation;negative regulation of anoikis;negative regulation of apoptosis;negative regulation of biological process;negative regulation of cell death;negative regulation of cellular process;negative regulation of gene expression;negative regulation of macromolecule metabolic process;negative regulation of metabolic process;negative regulation of programmed cell death;positive regulati…	aminoacyl-tRNA hydrolase activity;carboxylic ester hydrolase activity;catalytic activity;hydrolase activity;hydrolase activity, acting on ester bonds	cell part;cytoplasmic part;cytosol;intracellular membrane-bounded organelle;intracellular organelle;intracellular part;membrane-bounded organelle;mitochondrion;organelle		+			CTX_WT	1.74307	0.0389919	1.08942	0.731695	0.329655	0.659308	0.602099	0.288298	-0.430109
NaN	27.2348	26.8276	26.5266	26.8071	27.3113	26.5152	25.9598	NaN	26.7121	NaN	NaN	26.8603	26.0448	NaN	NaN	NaN	NaN	NaN	NaN	NaN	26.8071	26.7121	NaN	0.463347	0.434413	NaN	9	9	25.9	0	7.6473	42	aromatic compound biosynthetic process;biosynthetic process;cellular aromatic compound metabolic process;cellular biosynthetic process;cellular macromolecule metabolic process;cellular metabolic process;cellular nitrogen compound biosynthetic process;cellular nitrogen compound metabolic process;cellular process;cellular protein metabolic process;coenzyme biosynthetic process;coenzyme metabolic pr…	adenyl nucleotide binding;adenyl ribonucleotide binding;ATP binding;binding;catalytic activity;cation binding;ion binding;metal ion binding;nucleotide binding;nucleotidyltransferase activity;purine nucleotide binding;purine ribonucleoside triphosphate binding;purine ribonucleotide binding;ribonucleotide binding;small protein activating enzyme activity;sulfurtransferase activity;thiosulfate sulfur…	cell part;cytoplasmic part;cytosol;intracellular part	Sulfur relay system					0	1	NaN	0	1	NaN	0.267149	0.634255	-0.201258
NaN	NaN	NaN	NaN	NaN	NaN	NaN	NaN	NaN	NaN	NaN	NaN	NaN	NaN	NaN	23.4769	NaN	NaN	NaN	NaN	NaN	NaN	23.4769	NaN	NaN	NaN	NaN	1	1	7.6	0.0022741	0.58379	3	carbohydrate metabolic process;cellular carbohydrate metabolic process;cellular macromolecule metabolic process;cellular metabolic process;cellular process;cellular protein metabolic process;glycosylation;macromolecule glycosylation;macromolecule metabolic process;macromolecule modification;metabolic process;primary metabolic process;protein glycosylation;protein metabolic process;protein modific…	catalytic activity;glucosyltransferase activity;transferase activity;transferase activity, transferring glycosyl groups;transferase activity, transferring hexosyl groups	cell part;cytoplasmic part;endoplasmic reticulum membrane;endoplasmic reticulum part;integral to membrane;intracellular organelle part;intracellular part;intrinsic to membrane;membrane;membrane part;organelle membrane;organelle part	N-Glycan biosynthesis					-4.34294e-08	1	0	0	1	NaN	0	1	NaN
25.9471	25.9533	26.5255	26.0882	26.5258	26.5148	27.3503	27.0163	NaN	24.9558	NaN	26.2611	NaN	NaN	28.0064	27.5358	NaN	NaN	NaN	NaN	NaN	26.5202	26.8985	NaN	0.502061	1.37108	NaN	9	9	14.7	0	9.5317	37	cellular macromolecule metabolic process;cellular metabolic process;cellular nitrogen compound metabolic process;cellular process;macromolecule metabolic process;metabolic process;ncRNA metabolic process;ncRNA processing;nitrogen compound metabolic process;nucleic acid metabolic process;nucleobase-containing compound metabolic process;primary metabolic process;RNA metabolic process;RNA processing…		cell part;cytoplasm;histone methyltransferase complex;intracellular non-membrane-bounded organelle;intracellular organelle;intracellular organelle part;intracellular part;macromolecular complex;methyltransferase complex;MLL1 complex;non-membrane-bounded organelle;nuclear part;nucleolus;nucleoplasm part;organelle;organelle part;protein complex						0	1	NaN	0	1	NaN	0.147097	0.78641	0.199644
NaN	NaN	23.2917	NaN	NaN	NaN	NaN	NaN	NaN	NaN	NaN	NaN	NaN	NaN	NaN	NaN	NaN	NaN	NaN	NaN	NaN	23.2917	NaN	NaN	NaN	NaN	NaN	2	2	8	0	1.3026	4			cell part;cytoplasm;intracellular part						0	1	NaN	-4.34294e-08	1	0	0	1	NaN
NaN	NaN	NaN	NaN	NaN	NaN	NaN	NaN	NaN	NaN	NaN	NaN	NaN	NaN	NaN	21.0278	NaN	NaN	NaN	NaN	NaN	NaN	21.0278	NaN	NaN	NaN	NaN	1	1	3.7	0.0066919	0.40427	3	biological regulation;biosynthetic process;cellular biosynthetic process;cellular macromolecule biosynthetic process;cellular macromolecule metabolic process;cellular metabolic process;cellular nitrogen compound metabolic process;cellular process;establishment of localization;establishment of localization in cell;intracellular transport;macromolecule biosynthetic process;macromolecule metabolic p…	binding;DNA binding;nucleic acid binding	cell part;cytoplasm;intracellular membrane-bounded organelle;intracellular organelle;intracellular organelle part;intracellular part;membrane-bounded organelle;nuclear part;nucleoplasm;nucleus;organelle;organelle part						-4.34294e-08	1	0	0	1	NaN	0	1	NaN
27.7198	27.8614	26.8528	26.1668	26.3799	26.9258	27.761	28.0105	26.6706	26.2609	25.8627	27.2011	26.6614	26.4589	27.7217	27.8126	NaN	25.7464	NaN	25.7071	NaN	27.3228	26.666	25.7268	0.718555	0.691739	0.0277751	13	13	28.4	0	23.36	82	establishment of localization;establishment of protein localization;protein transport;transport	binding;cytoskeletal protein binding;gamma-tubulin binding;protein binding;tubulin binding	cell part;centrosome;cytoplasmic part;cytoskeletal part;endosomal part;endosome membrane;intracellular non-membrane-bounded organelle;intracellular organelle;intracellular organelle part;intracellular part;membrane;microtubule organizing center;mitochondrial membrane;mitochondrial outer membrane;mitochondrial part;non-membrane-bounded organelle;organelle;organelle membrane;organelle outer membran…	Endocytosis	+			CTX_WT	1.62819	0.0368796	1.48297	1.20128	0.0977179	1.10444	0.521102	0.351307	-0.378534
25.5333	NaN	26.7704	26.7708	26.81	26.5438	NaN	NaN	NaN	NaN	25.8809	NaN	NaN	NaN	NaN	NaN	NaN	NaN	NaN	NaN	NaN	26.7704	25.8809	NaN	0.542656	NaN	NaN	7	7	25.9	0	2.9202	20	biological regulation;cellular macromolecule metabolic process;cellular metabolic process;cellular nitrogen compound metabolic process;cellular process;cellular protein metabolic process;macromolecule metabolic process;macromolecule modification;metabolic process;mRNA metabolic process;mRNA processing;nitrogen compound metabolic process;nucleic acid metabolic process;nucleobase-containing compoun…	binding;catalytic activity;cis-trans isomerase activity;isomerase activity;peptidyl-prolyl cis-trans isomerase activity;ribonucleoprotein binding	cell part;cytoplasm;intracellular organelle part;intracellular part;macromolecular complex;nuclear body;nuclear part;nuclear speck;nucleoplasm part;organelle part;ribonucleoprotein complex;small nuclear ribonucleoprotein complex;spliceosomal complex;U4/U6 snRNP;U4/U6 x U5 tri-snRNP complex	Spliceosome					0	1	NaN	0	1	NaN	0	1	-0.604734
NaN	NaN	NaN	NaN	NaN	NaN	NaN	NaN	NaN	NaN	NaN	NaN	NaN	NaN	25.3517	25.6036	NaN	NaN	NaN	NaN	NaN	NaN	25.4776	NaN	NaN	0.178135	NaN	2	2	23.5	0	2.4471	10			cell part;integral to membrane;intrinsic to membrane;membrane part						-4.34294e-08	1	0	0	1	NaN	0	1	NaN
27.8914	27.4736	27.0677	27.5519	27.6136	27.3365	26.9171	27.3941	27.4918	27.0345	27.2545	27.4344	27.3444	27.1637	26.5218	26.5996	26.602	26.7347	25.9455	NaN	NaN	27.4338	27.2091	26.602	0.307763	0.366781	0.422559	6	6	25.2	0	15.014	66	biological regulation;cellular process;cellular response to chemical stimulus;cellular response to dsRNA;cellular response to exogenous dsRNA;cellular response to organic substance;cellular response to stimulus;defense response;defense response to bacterium;immune response;immune system process;innate immune response;multi-organism process;negative regulation of biological process;negative regula…	molecular transducer activity;signal transducer activity	cell part;cytoplasmic part;integral to membrane;intracellular membrane-bounded organelle;intracellular organelle;intracellular organelle part;intracellular part;intrinsic to membrane;membrane;membrane part;membrane-bounded organelle;microbody;microbody membrane;microbody part;mitochondrial membrane;mitochondrial outer membrane;mitochondrial part;organelle;organelle membrane;organelle outer membra…	Cytosolic DNA-sensing pathway;Hepatitis C;Measles;RIG-I-like receptor signaling pathway	+			CTX_WT	2.69609	0.00881214	0.978333	1.56789	0.075157	0.678192	1.00891	0.203827	-0.300141
NaN	NaN	25.1955	25.8387	NaN	24.9783	NaN	NaN	NaN	NaN	NaN	NaN	NaN	NaN	NaN	NaN	NaN	NaN	NaN	NaN	NaN	25.1955	NaN	NaN	0.447438	NaN	NaN	2	2	6	0	2.2222	8			cell part;intracellular membrane-bounded organelle;intracellular organelle;intracellular part;membrane-bounded organelle;nucleus;organelle						0	1	NaN	-4.34294e-08	1	0	0	1	NaN
NaN	NaN	NaN	NaN	NaN	NaN	24.9683	25.4066	NaN	24.655	NaN	NaN	24.7157	25.0668	27.2288	27.2004	NaN	NaN	NaN	NaN	NaN	25.1874	25.0668	NaN	0.309924	1.3251	NaN	4	4	12.6	0	24.031	24		binding;cation binding;ion binding;metal ion binding;transition metal ion binding;zinc ion binding	adherens junction;anchoring junction;cell junction;cell part;cell-substrate adherens junction;cell-substrate junction;cytoplasm;cytoskeleton;focal adhesion;intracellular non-membrane-bounded organelle;intracellular organelle;intracellular part;non-membrane-bounded organelle;organelle						0	1	NaN	0	1	NaN	0.234488	0.601019	0.58591
NaN	24.9216	NaN	NaN	NaN	NaN	NaN	NaN	NaN	NaN	NaN	NaN	NaN	NaN	NaN	NaN	NaN	NaN	NaN	NaN	NaN	24.9216	NaN	NaN	NaN	NaN	NaN	4	4	3.7	0	1.8544	3									0	1	NaN	-4.34294e-08	1	0	0	1	NaN
NaN	NaN	NaN	NaN	NaN	NaN	NaN	24.6064	NaN	NaN	NaN	NaN	NaN	NaN	26.1641	NaN	NaN	NaN	NaN	NaN	26.5714	24.6064	26.1641	26.5714	NaN	NaN	NaN	2	2	12.8	0.00016483	0.97334	11	aerobic respiration;anatomical structure morphogenesis;behavior;biological regulation;carbohydrate homeostasis;cell part morphogenesis;cellular component morphogenesis;cellular component organization;cellular component organization at cellular level;cellular component organization or biogenesis;cellular component organization or biogenesis at cellular level;cellular developmental process;cellular…	binding;catalytic activity;insulin-activated receptor activity;kinase activity;molecular transducer activity;odorant binding;pheromone binding;phosphotransferase activity, alcohol group as acceptor;protein kinase activity;protein tyrosine kinase activity;receptor activity;signal transducer activity;signaling receptor activity;transferase activity;transferase activity, transferring phosphorus-cont…	cell part;cytoplasmic part;cytosol;extracellular region;extracellular region part;extracellular space;intracellular membrane-bounded organelle;intracellular organelle;intracellular part;membrane-bounded organelle;nucleus;organelle						0	1	-1.96501	0	1	-0.40727	0	1	1.55774
NaN	NaN	NaN	NaN	NaN	NaN	NaN	NaN	NaN	NaN	NaN	NaN	NaN	NaN	NaN	NaN	NaN	NaN	NaN	NaN	25.431	NaN	NaN	25.431	NaN	NaN	NaN	1	1	4.6	0	1.5017	5		binding;carbohydrate binding	cell part;integral to membrane;intrinsic to membrane;membrane part						0	1	NaN	0	1	NaN	-4.34294e-08	1	0
24.4035	NaN	NaN	NaN	NaN	NaN	NaN	NaN	NaN	NaN	NaN	NaN	NaN	NaN	NaN	NaN	NaN	NaN	NaN	NaN	NaN	24.4035	NaN	NaN	NaN	NaN	NaN	2	1	26.3	0.0019796	0.60839	2	cellular component organization;cellular component organization at cellular level;cellular component organization or biogenesis;cellular component organization or biogenesis at cellular level;cellular process;chromatin modification;chromatin organization;chromosome organization;organelle organization	binding;chromatin binding;DNA binding;nucleic acid binding	cell part;chromatin remodeling complex;histone methyltransferase complex;intracellular organelle part;intracellular part;ISWI complex;macromolecular complex;methyltransferase complex;MLL1 complex;nuclear part;nucleoplasm part;NURF complex;organelle part;protein complex						0	1	NaN	-4.34294e-08	1	0	0	1	NaN
NaN	NaN	NaN	NaN	NaN	NaN	NaN	23.974	NaN	NaN	NaN	NaN	NaN	NaN	NaN	NaN	NaN	NaN	NaN	NaN	NaN	23.974	NaN	NaN	NaN	NaN	NaN	3	3	4.3	0	2.4922	5	biological regulation;biosynthetic process;cellular biosynthetic process;cellular component organization;cellular component organization at cellular level;cellular component organization or biogenesis;cellular component organization or biogenesis at cellular level;cellular macromolecule biosynthetic process;cellular macromolecule metabolic process;cellular metabolic process;cellular nitrogen comp…	binding;DNA binding;nucleic acid binding	cell part;intracellular membrane-bounded organelle;intracellular organelle;intracellular part;membrane-bounded organelle;nucleus;organelle						0	1	NaN	-4.34294e-08	1	0	0	1	NaN
27.0419	27.0445	25.7651	25.85	26.8638	26.1301	26.068	26.3142	NaN	NaN	25.5579	NaN	NaN	25.7483	NaN	NaN	NaN	NaN	NaN	NaN	NaN	26.2221	25.6531	NaN	0.525989	0.134619	NaN	7	7	8.1	0	11.149	34	anatomical structure development;biological regulation;cell cycle process;cell development;cellular component assembly;cellular component assembly at cellular level;cellular component organization;cellular component organization at cellular level;cellular component organization or biogenesis;cellular component organization or biogenesis at cellular level;cellular developmental process;cellular ma…	binding;catalytic activity;cation binding;histone methyltransferase activity;histone methyltransferase activity (H3-K27 specific);histone methyltransferase activity (H3-K9 specific);histone-lysine N-methyltransferase activity;ion binding;lysine N-methyltransferase activity;metal ion binding;methyltransferase activity;N-methyltransferase activity;protein methyltransferase activity;protein-lysine N…	cell part;chromosome;intracellular membrane-bounded organelle;intracellular non-membrane-bounded organelle;intracellular organelle;intracellular part;membrane-bounded organelle;non-membrane-bounded organelle;nucleus;organelle	Lysine degradation					0	1	NaN	0	1	NaN	1.00836	0.102853	-0.731589
NaN	NaN	23.6982	24.1967	NaN	NaN	NaN	23.7498	NaN	NaN	NaN	NaN	NaN	NaN	NaN	NaN	NaN	NaN	NaN	NaN	NaN	23.7498	NaN	NaN	0.274141	NaN	NaN	3	3	2.5	0.00016958	1.1599	7									0	1	NaN	-4.34294e-08	1	0	0	1	NaN
NaN	NaN	NaN	NaN	NaN	NaN	NaN	NaN	NaN	NaN	NaN	NaN	NaN	NaN	NaN	NaN	NaN	NaN	NaN	NaN	NaN	NaN	NaN	NaN	NaN	NaN	NaN	2	2	8.3	0.0079583	0.37639	3	cellular macromolecule metabolic process;cellular metabolic process;cellular nitrogen compound metabolic process;cellular process;guanosine metabolic process;heterocycle metabolic process;macromolecule metabolic process;macromolecule modification;metabolic process;ncRNA metabolic process;ncRNA processing;nitrogen compound metabolic process;nucleic acid metabolic process;nucleobase-containing comp…	binding;catalytic activity;cation binding;dioxygenase activity;identical protein binding;ion binding;iron ion binding;metal ion binding;nucleic acid binding;oxidoreductase activity;oxidoreductase activity, acting on paired donors, with incorporation or reduction of molecular oxygen;oxidoreductase activity, acting on paired donors, with incorporation or reduction of molecular oxygen, 2-oxoglutarat…							-4.34294e-08	1	0	-4.34294e-08	1	0	-4.34294e-08	1	0
NaN	NaN	NaN	NaN	NaN	NaN	NaN	NaN	NaN	NaN	NaN	NaN	NaN	23.5951	NaN	NaN	NaN	NaN	NaN	NaN	NaN	NaN	23.5951	NaN	NaN	NaN	NaN	12	1	55.1	0.0051395	0.43971	4	biological regulation;establishment of localization;establishment of localization in cell;establishment of protein localization;intracellular protein transport;intracellular transport;protein transport;regulation of biological process;regulation of cellular localization;regulation of cellular process;regulation of establishment of protein localization;regulation of localization;regulation of prot…		cell part;cytoplasmic part;cytosol;Golgi apparatus part;Golgi membrane;intracellular organelle part;intracellular part;membrane;organelle membrane;organelle part						-4.34294e-08	1	0	0	1	NaN	0	1	NaN
NaN	NaN	24.8188	25.1005	25.087	25.5522	NaN	NaN	NaN	NaN	NaN	NaN	NaN	24.3301	NaN	NaN	NaN	NaN	NaN	NaN	NaN	25.0937	24.3301	NaN	0.304071	NaN	NaN	3	3	8	0	7.1544	12	adult behavior;adult locomotory behavior;behavior;locomotory behavior;multicellular organismal process;response to stimulus	binding;catalytic activity;cation binding;ion binding;metal ion binding;methyltransferase activity;N-methyltransferase activity;nucleic acid binding;RNA binding;RNA methyltransferase activity;S-adenosylmethionine-dependent methyltransferase activity;transferase activity;transferase activity, transferring one-carbon groups;transition metal ion binding;tRNA (guanine) methyltransferase activity;tRNA…							0	1	NaN	0	1	NaN	0	1	-0.8095
NaN	NaN	24.2714	24.4089	NaN	NaN	26.4553	26.7534	24.8698	NaN	NaN	NaN	25.4401	25.2122	25.6386	25.7301	NaN	NaN	NaN	NaN	NaN	25.4321	25.4401	NaN	1.31409	0.34697	NaN	5	5	23.5	0	1.7214	22		carboxyl-O-methyltransferase activity;catalytic activity;methyltransferase activity;O-methyltransferase activity;protein carboxyl O-methyltransferase activity;protein C-terminal carboxyl O-methyltransferase activity;protein methyltransferase activity;transferase activity;transferase activity, transferring one-carbon groups							0	1	NaN	0	1	NaN	0.0552798	0.985962	-0.0940818
NaN	NaN	NaN	NaN	NaN	NaN	NaN	NaN	NaN	NaN	NaN	NaN	23.4783	NaN	NaN	NaN	NaN	NaN	NaN	NaN	NaN	NaN	23.4783	NaN	NaN	NaN	NaN	1	1	6.3	0	1.2335	1									-4.34294e-08	1	0	0	1	NaN	0	1	NaN
NaN	NaN	NaN	NaN	NaN	NaN	NaN	26.1546	NaN	NaN	NaN	NaN	NaN	NaN	26.7976	25.8926	NaN	NaN	NaN	NaN	NaN	26.1546	26.3451	NaN	NaN	0.639911	NaN	4	3	4.7	0	3.0217	8	anatomical structure development;anatomical structure formation involved in morphogenesis;anatomical structure morphogenesis;angiogenesis;apoptosis;axon guidance;axonal fasciculation;axonogenesis;behavior;biological adhesion;biological regulation;biosynthetic process;brain development;branching morphogenesis of a nerve;camera-type eye morphogenesis;cAMP-mediated signaling;cell adhesion;cell commu…	adenyl nucleotide binding;adenyl ribonucleotide binding;ATP binding;axon guidance receptor activity;binding;catalytic activity;cation binding;chemorepellent activity;ephrin receptor activity;GPI-linked ephrin receptor activity;ion binding;kinase activity;lipid binding;metal ion binding;molecular transducer activity;non-membrane spanning protein tyrosine kinase activity;nucleotide binding;phosphat…	axon;cell body;cell part;cell projection;cytoplasmic part;cytoplasmic vesicle;cytosol;dendrite;early endosome;early endosome membrane;endoplasmic reticulum;endosomal part;endosome;endosome membrane;external side of plasma membrane;extracellular region;integral to membrane;integral to plasma membrane;intracellular membrane-bounded organelle;intracellular organelle;intracellular organelle part;intr…	Axon guidance;B cell receptor signaling pathway;Fc epsilon RI signaling pathway;Osteoclast differentiation;Primary immunodeficiency					0	1	NaN	0	1	NaN	0	1	0.190545
30.6612	30.6517	31.6501	31.7587	31.8799	31.5526	32.0655	31.7987	31.0038	31.1948	30.7642	30.8267	30.9756	30.9849	31.3458	31.4176	30.2563	29.9118	30.0405	30.9779	31.3838	31.7044	30.9944	30.2563	0.54362	0.234646	0.63735	47	47	61.8	0	107.94	549	biological regulation;regulation of biological process;regulation of catabolic process;regulation of catalytic activity;regulation of macromolecule metabolic process;regulation of metabolic process;regulation of molecular function;regulation of primary metabolic process;regulation of protein catabolic process;regulation of protein metabolic process	enzyme regulator activity	cell part;intracellular part;macromolecular complex;proteasome accessory complex;proteasome complex;protein complex	Proteasome	+			CTX_WT	1.91138	0.0319408	0.988239	1.34383	0.137787	0.55012	1.25921	0.106315	-0.438119
NaN	26.5346	NaN	27.5742	26.8051	26.8397	26.7908	26.6834	27.134	26.8066	27.4209	27.1985	27.3231	27.5254	27.5296	28.1137	NaN	27.9359	28.284	NaN	NaN	26.798	27.372	28.11	0.361833	0.379642	0.246151	9	9	26.5	0	16.001	37	biological regulation;catabolic process;cell cycle phase;cell cycle process;cell division;cellular catabolic process;cellular component organization;cellular component organization at cellular level;cellular component organization or biogenesis;cellular component organization or biogenesis at cellular level;cellular macromolecule catabolic process;cellular macromolecule metabolic process;cellular…	binding;catalytic activity;cation binding;coenzyme binding;cofactor binding;deacetylase activity;enzyme binding;histone acetyltransferase binding;histone deacetylase activity;histone deacetylase binding;hydrolase activity;hydrolase activity, acting on carbon-nitrogen (but not peptide) bonds;hydrolase activity, acting on carbon-nitrogen (but not peptide) bonds, in linear amides;ion binding;metal i…	cell part;cytoplasm;cytoskeletal part;intracellular organelle part;intracellular part;macromolecular complex;microtubule;organelle part;protein complex		+			CTX_WT	2.33742	0.0107283	-1.23866	1.44614	0.0839562	-0.728476	1.58386	0.0579764	0.510185
NaN	NaN	NaN	NaN	NaN	NaN	NaN	NaN	NaN	NaN	24.4	NaN	NaN	NaN	NaN	NaN	NaN	NaN	NaN	NaN	NaN	NaN	24.4	NaN	NaN	NaN	NaN	1	1	2.3	0	1.3919	4									-4.34294e-08	1	0	0	1	NaN	0	1	NaN
NaN	23.5601	NaN	NaN	NaN	NaN	NaN	NaN	NaN	NaN	NaN	NaN	NaN	NaN	NaN	NaN	NaN	NaN	NaN	NaN	NaN	23.5601	NaN	NaN	NaN	NaN	NaN	2	2	13.4	0.00016258	0.91494	3	anaphase;biological regulation;cell cycle phase;cell cycle process;cell division;cellular component organization;cellular component organization at cellular level;cellular component organization or biogenesis;cellular component organization or biogenesis at cellular level;cellular process;chromosome organization;chromosome segregation;cytoskeleton organization;microtubule cytoskeleton organizatio…		cell part;chromosomal part;condensed chromosome kinetochore;cytoplasm;cytoskeletal part;intracellular membrane-bounded organelle;intracellular non-membrane-bounded organelle;intracellular organelle;intracellular organelle part;intracellular part;kinetochore;macromolecular complex;membrane-bounded organelle;microtubule plus end;mitotic spindle;non-membrane-bounded organelle;nucleus;organelle;organ…						0	1	NaN	-4.34294e-08	1	0	0	1	NaN
NaN	NaN	NaN	24.3875	24.8355	24.7677	NaN	NaN	NaN	NaN	NaN	NaN	NaN	NaN	NaN	NaN	NaN	NaN	NaN	NaN	NaN	24.7677	NaN	NaN	0.241466	NaN	NaN	3	3	3.9	0.0025545	0.54615	5	biological regulation;cell cycle;cellular component organization;cellular component organization at cellular level;cellular component organization or biogenesis;cellular component organization or biogenesis at cellular level;cellular process;centriole-centriole cohesion;centrosome organization;localization;macromolecule localization;microtubule organizing center organization;mitotic cell cycle;or…		cell part;cell projection;cell projection part;centriole;centrosome;cilium;cytoplasmic part;cytoskeletal part;intracellular non-membrane-bounded organelle;intracellular organelle;intracellular organelle part;intracellular part;microtubule basal body;microtubule organizing center;microtubule organizing center part;non-membrane-bounded organelle;organelle;organelle part;perinuclear region of cytopl…						0	1	NaN	-4.34294e-08	1	0	0	1	NaN
NaN	NaN	NaN	NaN	NaN	21.1879	NaN	NaN	NaN	NaN	NaN	NaN	NaN	NaN	NaN	NaN	NaN	NaN	NaN	NaN	NaN	21.1879	NaN	NaN	NaN	NaN	NaN	2	2	6.6	0.00094444	0.74245	2	carbohydrate metabolic process;cellular carbohydrate metabolic process;cellular macromolecule metabolic process;cellular metabolic process;cellular process;cellular protein metabolic process;glycosylation;macromolecule glycosylation;macromolecule metabolic process;macromolecule modification;metabolic process;primary metabolic process;protein glycosylation;protein metabolic process;protein modific…	catalytic activity;transferase activity;transferase activity, transferring alkyl or aryl (other than methyl) groups	cell part;cytoplasmic part;endoplasmic reticulum membrane;endoplasmic reticulum part;intracellular organelle part;intracellular part;membrane;membrane part;organelle membrane;organelle part	Terpenoid backbone biosynthesis					0	1	NaN	-4.34294e-08	1	0	0	1	NaN
33.6002	33.4758	31.3351	31.5509	31.346	31.6985	30.077	29.2974	31.5742	32.3904	32.6355	33.1619	31.4651	31.6931	NaN	NaN	31.1954	31.5998	30.9674	NaN	NaN	31.4485	32.0417	31.1954	1.47678	0.682168	0.320266	6	6	38.9	0	4.5223	84		binding;chromatin binding;chromatin DNA binding;DNA binding;nucleic acid binding;nucleosomal DNA binding;nucleosome binding;structure-specific DNA binding	cell part;chromatin;chromosomal part;cytoplasm;intracellular membrane-bounded organelle;intracellular organelle;intracellular organelle part;intracellular part;membrane-bounded organelle;nucleus;organelle;organelle part						0.125782	1	0.293411	1.14075	0.127835	0.899173	0.428858	0.376051	0.605762
26.3392	26.006	26.2967	26.9952	26.0584	26.903	27.6716	27.4969	NaN	26.6096	26.0889	26.4597	26.6273	26.246	27.4407	26.658	NaN	NaN	NaN	NaN	NaN	26.6211	26.6096	NaN	0.642526	0.431389	NaN	7	7	58.2	0	8.8435	33	biological regulation;cellular component organization;cellular component organization or biogenesis;regulation of actin cytoskeleton organization;regulation of actin filament length;regulation of actin filament polymerization;regulation of actin filament-based process;regulation of actin polymerization or depolymerization;regulation of anatomical structure size;regulation of biological process;re…		cell part;cytoplasm;cytoskeleton;intracellular non-membrane-bounded organelle;intracellular organelle;intracellular part;non-membrane-bounded organelle;organelle	Bacterial invasion of epithelial cells;Fc gamma R-mediated phagocytosis;Pathogenic Escherichia coli infection;Regulation of actin cytoskeleton;Shigellosis					0	1	NaN	0	1	NaN	0.182905	0.767517	-0.130862
NaN	NaN	NaN	NaN	NaN	24.5664	NaN	NaN	NaN	NaN	NaN	NaN	NaN	NaN	NaN	NaN	NaN	NaN	NaN	NaN	NaN	24.5664	NaN	NaN	NaN	NaN	NaN	8	1	29.7	0	3.1468	9	macromolecule metabolic process;membrane protein proteolysis;metabolic process;primary metabolic process;protein metabolic process;proteolysis	aspartic endopeptidase activity, intramembrane cleaving;aspartic-type endopeptidase activity;aspartic-type peptidase activity;binding;catalytic activity;endopeptidase activity;hydrolase activity;identical protein binding;peptidase activity;peptidase activity, acting on L-amino acid peptides;protein binding;protein dimerization activity;protein homodimerization activity	cell part;cell surface;cytoplasmic part;endoplasmic reticulum;endoplasmic reticulum membrane;endoplasmic reticulum part;integral to cytosolic side of endoplasmic reticulum membrane;integral to endoplasmic reticulum membrane;integral to lumenal side of endoplasmic reticulum membrane;integral to membrane;integral to organelle membrane;intracellular membrane-bounded organelle;intracellular organelle…						0	1	NaN	-4.34294e-08	1	0	0	1	NaN
27.0402	25.7229	25.6983	25.9161	25.9958	25.9744	NaN	NaN	26.8653	25.7741	25.3394	NaN	26.1115	26.2634	NaN	NaN	NaN	NaN	NaN	NaN	NaN	25.9453	26.1115	NaN	0.497469	0.568544	NaN	222	0	74.4	0	9.6397	21		binding;calcium ion binding;cation binding;cytoskeletal protein binding;ion binding;metal ion binding;protein binding;protein dimerization activity;protein heterodimerization activity;spectrin binding	adherens junction;anchoring junction;cell cortex part;cell junction;cell part;cell-cell adherens junction;cell-cell junction;contractile fiber part;cuticular plate;cytoplasmic part;cytoskeletal part;cytoskeleton;fascia adherens;intracellular membrane-bounded organelle;intracellular non-membrane-bounded organelle;intracellular organelle;intracellular organelle part;intracellular part;lateral plasm…						0	1	NaN	0	1	NaN	0.0136271	1	0.0127836
NaN	NaN	NaN	NaN	NaN	24	NaN	NaN	NaN	NaN	NaN	NaN	NaN	NaN	NaN	NaN	NaN	NaN	NaN	NaN	NaN	24	NaN	NaN	NaN	NaN	NaN	2	2	4.1	0	2.303	3	anatomical structure development;cell development;cellular developmental process;cellular process;cellular process involved in reproduction;developmental process;developmental process involved in reproduction;germ cell development;multicellular organismal development;multicellular organismal process;reproductive process;spermatid development	structural constituent of cytoskeleton;structural molecule activity	axoneme part;cell part;cell projection;cell projection part;centriole;cilium;cytoplasmic part;cytoskeletal part;intracellular non-membrane-bounded organelle;intracellular organelle;intracellular organelle part;intracellular part;macromolecular complex;microtubule;microtubule organizing center part;non-membrane-bounded organelle;organelle;organelle part;outer dense fiber;protein complex;spindle po…						0	1	NaN	-4.34294e-08	1	0	0	1	NaN
25.1614	24.923	27.8522	27.3565	27.4352	26.9195	28.2222	27.7415	26.3209	26.4597	26.2127	26.105	26.2117	25.5776	NaN	26.7179	NaN	NaN	NaN	NaN	NaN	27.3959	26.2127	NaN	1.24029	0.351411	NaN	11	9	25.5	0	20.321	49	biological adhesion;biosynthetic process;carbohydrate biosynthetic process;carbohydrate metabolic process;cell adhesion;cellular biosynthetic process;cellular carbohydrate biosynthetic process;cellular carbohydrate metabolic process;cellular lipid metabolic process;cellular macromolecule biosynthetic process;cellular macromolecule metabolic process;cellular metabolic process;cellular polysacchari…		cell part;cytoplasmic part;endoplasmic reticulum lumen;endoplasmic reticulum part;intracellular organelle lumen;intracellular organelle part;intracellular part;membrane-enclosed lumen;organelle lumen;organelle part						0	1	NaN	0	1	NaN	0.790585	0.161218	-0.722074
28.7312	28.8726	29.6003	29.9751	30.1881	29.7526	30.2234	29.9488	30.2177	30.3813	29.48	28.9051	30.7018	30.5863	31.787	31.8243	30.5252	30.5462	31.1069	32.0272	32.2604	29.8507	30.4838	31.1069	0.569941	1.00956	0.815002	17	17	53.9	0	54.939	373	2-oxoglutarate metabolic process;acetyl-CoA catabolic process;acetyl-CoA metabolic process;carboxylic acid metabolic process;catabolic process;cellular catabolic process;cellular ketone metabolic process;cellular metabolic process;cellular nitrogen compound metabolic process;cellular process;coenzyme catabolic process;coenzyme metabolic process;cofactor catabolic process;cofactor metabolic proces…	binding;catalytic activity;cation binding;coenzyme binding;cofactor binding;ion binding;isocitrate dehydrogenase (NAD+) activity;isocitrate dehydrogenase activity;magnesium ion binding;metal ion binding;NAD binding;nucleotide binding;oxidoreductase activity;oxidoreductase activity, acting on CH-OH group of donors;oxidoreductase activity, acting on the CH-OH group of donors, NAD or NADP as acceptor	cell part;cytoplasmic part;intracellular membrane-bounded organelle;intracellular organelle;intracellular part;membrane-bounded organelle;mitochondrion;organelle	Citrate cycle (TCA cycle)	+			CTX_WT	2.88279	0.00278006	-1.63166	0.792331	0.268946	-0.807728	1.19321	0.0672614	0.823933
NaN	NaN	NaN	NaN	NaN	22.6766	NaN	NaN	NaN	NaN	NaN	NaN	NaN	NaN	NaN	NaN	NaN	NaN	NaN	NaN	NaN	22.6766	NaN	NaN	NaN	NaN	NaN	2	1	1.7	0.0028346	0.51909	3	actin cytoskeleton organization;actin filament-based process;biological regulation;cellular component organization;cellular component organization at cellular level;cellular component organization or biogenesis;cellular component organization or biogenesis at cellular level;cellular process;cytoskeleton organization;organelle organization;regulation of ARF protein signal transduction;regulation o…	ARF guanyl-nucleotide exchange factor activity;binding;enzyme regulator activity;GTPase regulator activity;guanyl-nucleotide exchange factor activity;lipid binding;nucleoside-triphosphatase regulator activity;phospholipid binding;small GTPase regulator activity	cell junction;cell part;cytoplasm;intracellular membrane-bounded organelle;intracellular organelle;intracellular part;membrane-bounded organelle;nucleus;organelle	Endocytosis					0	1	NaN	-4.34294e-08	1	0	0	1	NaN
NaN	NaN	NaN	NaN	NaN	25.0179	NaN	NaN	NaN	25.7386	25.2282	NaN	NaN	NaN	NaN	25.6211	NaN	NaN	NaN	NaN	NaN	25.0179	25.6211	NaN	NaN	0.267332	NaN	4	4	19.2	0	8.8371	13	anatomical structure development;biological regulation;carbohydrate homeostasis;cellular chemical homeostasis;cellular glucose homeostasis;cellular homeostasis;cellular metabolic process;cellular process;cellular response to carbohydrate stimulus;cellular response to chemical stimulus;cellular response to glucose stimulus;cellular response to hexose stimulus;cellular response to monosaccharide st…	binding;catalytic activity;endopeptidase activity;hydrolase activity;peptidase activity;peptidase activity, acting on L-amino acid peptides;peptide binding;serine hydrolase activity;serine-type endopeptidase activity;serine-type peptidase activity	cell part;extracellular matrix;extracellular region;extracellular region part;intracellular	Renin-angiotensin system					0	1	NaN	0	1	NaN	0	1	0.511419
26.9107	26.9984	26.7139	25.3514	26.0514	26.1664	25.6301	26.1056	NaN	NaN	NaN	25.7939	NaN	NaN	26.0279	25.4182	NaN	NaN	NaN	NaN	NaN	26.136	25.7939	NaN	0.594031	0.307557	NaN	1	1	11.5	0	7.7032	25		enzyme inhibitor activity;enzyme regulator activity;phosphatase inhibitor activity;phosphatase regulator activity;protein phosphatase inhibitor activity;protein phosphatase regulator activity	cell part;cytoplasm;intracellular part						0	1	NaN	0	1	NaN	0.673495	0.237252	-0.494317
25.9581	25.1781	NaN	25.4095	25.3954	24.6967	25.0522	25.7007	25.2237	25.3994	NaN	NaN	NaN	NaN	NaN	25.5875	NaN	NaN	NaN	NaN	NaN	25.3954	25.3994	NaN	0.41691	0.181935	NaN	9	9	8.3	0	4.5643	16	actin filament-based process;actin-mediated cell contraction;apical constriction;biological adhesion;biological regulation;cell adhesion;cell cycle;cell division;cell junction assembly;cell junction organization;cell migration;cell motility;cell-cell adhesion;cell-cell junction assembly;cell-cell junction organization;cellular component assembly;cellular component assembly at cellular level;cellu…	binding;lipid binding;phosphatidylinositol binding;phosphatidylinositol-3,4,5-trisphosphate binding;phosphatidylinositol-3-phosphate binding;phosphatidylinositol-4,5-bisphosphate binding;phospholipid binding	adherens junction;anchoring junction;apical part of cell;axon part;axonal growth cone;cell body;cell cortex;cell junction;cell part;cell projection part;cell-cell adherens junction;cell-cell junction;cytoplasm;cytoplasmic part;cytoskeletal part;endomembrane system;growth cone;intracellular non-membrane-bounded organelle;intracellular organelle;intracellular organelle part;intracellular part;later…	Adherens junction;Chemokine signaling pathway;Endocytosis;Neuroactive ligand-receptor interaction;Tight junction					0	1	NaN	0	1	NaN	0.0886282	0.943544	0.0619957
28.7285	28.2316	29.6721	29.7431	29.6843	29.5421	29.2305	29.2679	29.3406	29.2522	28.726	28.8877	29.8009	29.7012	28.2826	28.203	27.9858	28.5791	28.3763	NaN	NaN	29.405	29.0699	28.3763	0.53505	0.603045	0.301561	23	17	50.6	0	28.714	136	biological regulation;catabolic process;cellular catabolic process;cellular macromolecule catabolic process;cellular macromolecule metabolic process;cellular metabolic process;cellular nitrogen compound metabolic process;cellular process;establishment of localization;establishment of RNA localization;macromolecule catabolic process;macromolecule metabolic process;metabolic process;mRNA catabolic …	adenyl nucleotide binding;adenyl ribonucleotide binding;ATP binding;ATPase activity;ATPase activity, coupled;ATP-dependent helicase activity;binding;catalytic activity;helicase activity;hydrolase activity;hydrolase activity, acting on acid anhydrides;hydrolase activity, acting on acid anhydrides, in phosphorus-containing anhydrides;nucleic acid binding;nucleoside-triphosphatase activity;nucleotid…	cell part;cytoplasm;intracellular organelle part;intracellular part;macromolecular complex;nuclear body;nuclear part;nuclear speck;nucleoplasm part;organelle part;ribonucleoprotein complex;spliceosomal complex	mRNA surveillance pathway;RNA transport;Spliceosome	+			CTX_WT	1.71477	0.0469722	0.948782	1.05083	0.174765	0.710551	0.379551	0.510554	-0.238231
26.3943	26.5218	25.1315	25.7097	25.9921	27.2683	26.3374	26.563	NaN	NaN	NaN	NaN	NaN	NaN	NaN	NaN	NaN	NaN	NaN	NaN	NaN	26.3658	NaN	NaN	0.637612	NaN	NaN	5	5	19	0	11.346	25	biological regulation;biosynthetic process;cellular biosynthetic process;cellular macromolecule biosynthetic process;cellular macromolecule metabolic process;cellular metabolic process;cellular nitrogen compound metabolic process;cellular process;macromolecule biosynthetic process;macromolecule metabolic process;metabolic process;nitrogen compound metabolic process;nucleic acid metabolic process;…	binding;cation binding;ion binding;metal ion binding;transition metal ion binding;zinc ion binding	cell part;intracellular membrane-bounded organelle;intracellular organelle;intracellular part;membrane-bounded organelle;nucleus;organelle						0	1	NaN	-4.34294e-08	1	0	0	1	NaN
25.5221	NaN	26.5972	26.2847	26.4144	26.7178	27.4523	27.8822	25.5933	25.5271	NaN	25.8796	25.6134	25.4539	26.5594	26.9189	NaN	NaN	NaN	NaN	NaN	26.5972	25.6134	NaN	0.77627	0.574318	NaN	19	19	21.4	0	15.211	63	cellular aromatic compound metabolic process;cellular metabolic process;cellular process;heterocycle metabolic process;metabolic process;nitrogen compound metabolic process;pteridine-containing compound metabolic process	5-methyltetrahydrofolate-dependent methyltransferase activity;binding;catalytic activity;cation binding;cobalamin binding;homocysteine S-methyltransferase activity;ion binding;metal ion binding;methionine synthase activity;methyltransferase activity;S-adenosylmethionine-dependent methyltransferase activity;S-methyltransferase activity;tetrapyrrole binding;transferase activity;transferase activity…	cell part;cytoplasm;intracellular part	Cysteine and methionine metabolism;One carbon pool by folate;Selenocompound metabolism					0	1	NaN	0	1	NaN	1.2279	0.0668156	-0.760714
NaN	NaN	25.7324	24.5055	24.914	NaN	25.4099	25.5266	NaN	25.1493	NaN	NaN	NaN	NaN	25.4621	25.4415	NaN	NaN	NaN	NaN	25.4298	25.4099	25.4415	25.4298	0.499186	0.174968	NaN	6	6	11.2	0	19.216	18	cellular process;membrane docking;vesicle docking;vesicle docking involved in exocytosis		cell cortex part;cell part;cytoplasmic part;exocyst;intracellular part;macromolecular complex;protein complex						0	1	-0.21214	0	1	-0.0788326	0.168144	0.783272	0.133307
NaN	NaN	25.5877	25.5063	26.6544	26.158	26.1776	26.5261	25.9849	NaN	NaN	NaN	25.858	25.8379	26.2158	NaN	NaN	NaN	NaN	NaN	NaN	26.1678	25.9214	NaN	0.471849	0.17375	NaN	7	7	16.9	0	5.6419	20	macromolecule metabolic process;metabolic process;primary metabolic process;protein metabolic process;proteolysis	binding;catalytic activity;cation binding;endopeptidase activity;hydrolase activity;ion binding;metal ion binding;metalloendopeptidase activity;metallopeptidase activity;peptidase activity;peptidase activity, acting on L-amino acid peptides	cell part;cytoplasmic part;intracellular membrane-bounded organelle;intracellular organelle;intracellular organelle lumen;intracellular organelle part;intracellular part;membrane-bounded organelle;membrane-enclosed lumen;mitochondrial matrix;mitochondrial part;mitochondrion;organelle;organelle lumen;organelle part						0	1	NaN	0	1	NaN	0.204683	0.747656	-0.127562
NaN	24.6645	NaN	NaN	NaN	NaN	NaN	NaN	NaN	NaN	NaN	NaN	NaN	NaN	NaN	NaN	NaN	NaN	NaN	NaN	NaN	24.6645	NaN	NaN	NaN	NaN	NaN	6	6	4	0	1.7511	7	biological regulation;biosynthetic process;cellular biosynthetic process;cellular macromolecule biosynthetic process;cellular macromolecule metabolic process;cellular metabolic process;cellular nitrogen compound metabolic process;cellular process;cellular response to stimulus;intracellular signal transduction;macromolecule biosynthetic process;macromolecule metabolic process;metabolic process;mRN…	binding;cation binding;enzyme binding;ion binding;metal ion binding;protein binding;RNA polymerase binding;transition metal ion binding;zinc ion binding							0	1	NaN	-4.34294e-08	1	0	0	1	NaN
NaN	NaN	25.0872	25.1093	24.4678	25.346	24.7951	25.7648	NaN	NaN	NaN	NaN	NaN	NaN	NaN	NaN	NaN	NaN	NaN	NaN	NaN	25.0983	NaN	NaN	0.446163	NaN	NaN	6	6	23.2	0	5.3971	13									0	1	NaN	-4.34294e-08	1	0	0	1	NaN
NaN	NaN	NaN	NaN	NaN	NaN	NaN	NaN	NaN	NaN	NaN	NaN	NaN	NaN	NaN	NaN	NaN	NaN	NaN	NaN	23.0162	NaN	NaN	23.0162	NaN	NaN	NaN	1	1	1.7	0.00016348	0.93975	11									0	1	NaN	0	1	NaN	-4.34294e-08	1	0
26.9103	26.9412	26.6301	26.326	26.9584	26.8252	26.2575	26.1726	26.5457	25.894	26.2279	25.9747	26.0585	26.3181	NaN	26.473	NaN	NaN	NaN	NaN	NaN	26.7276	26.2279	NaN	0.329858	0.249	NaN	18	18	14.3	0	13.672	48	cellular component organization;cellular component organization or biogenesis;cellular localization;cellular macromolecule localization;cellular membrane organization;cellular process;cellular protein localization;cellular response to chemical stimulus;cellular response to endogenous stimulus;cellular response to hormone stimulus;cellular response to insulin stimulus;cellular response to organic …	enzyme regulator activity;GTPase regulator activity;guanyl-nucleotide exchange factor activity;nucleoside-triphosphatase regulator activity;Rab guanyl-nucleotide exchange factor activity;Ras guanyl-nucleotide exchange factor activity;small GTPase regulator activity	cell part;cytoplasmic membrane-bounded vesicle;cytoplasmic part;cytoplasmic vesicle;cytoplasmic vesicle membrane;cytoplasmic vesicle part;cytosol;insulin-responsive compartment;intracellular membrane-bounded organelle;intracellular organelle;intracellular organelle part;intracellular part;macromolecular complex;membrane;membrane part;membrane-bounded organelle;membrane-bounded vesicle;organelle;o…						0	1	NaN	0	1	NaN	1.75017	0.0646659	-0.414513
NaN	NaN	NaN	NaN	NaN	NaN	23.2949	NaN	NaN	NaN	NaN	NaN	NaN	NaN	NaN	NaN	NaN	NaN	NaN	NaN	NaN	23.2949	NaN	NaN	NaN	NaN	NaN	2	2	3	0.001979	0.60834	2	biological regulation;cell activation;cell surface receptor linked signaling pathway;cellular macromolecule metabolic process;cellular metabolic process;cellular process;cellular protein metabolic process;cellular response to stimulus;immune response;immune system process;intracellular signal transduction;leukocyte activation;lymphocyte activation;macromolecule metabolic process;macromolecule mod…	acid-amino acid ligase activity;binding;calcium ion binding;catalytic activity;cation binding;ion binding;ligase activity;ligase activity, forming carbon-nitrogen bonds;metal ion binding;molecular transducer activity;signal transducer activity;small conjugating protein ligase activity;transition metal ion binding;ubiquitin-protein ligase activity;zinc ion binding	cell part;cytoplasm;intracellular membrane-bounded organelle;intracellular organelle;intracellular part;membrane-bounded organelle;nucleus;organelle	Bacterial invasion of epithelial cells;Chronic myeloid leukemia;Endocytosis;ErbB signaling pathway;Insulin signaling pathway;Jak-STAT signaling pathway;Pathways in cancer;T cell receptor signaling pathway;Ubiquitin mediated proteolysis					0	1	NaN	-4.34294e-08	1	0	0	1	NaN
NaN	NaN	NaN	NaN	NaN	NaN	25.3358	24.6742	NaN	NaN	NaN	NaN	NaN	NaN	NaN	NaN	NaN	NaN	NaN	NaN	NaN	25.005	NaN	NaN	0.467822	NaN	NaN	4	4	6	0	1.4154	7	androgen receptor signaling pathway;biological regulation;biosynthetic process;cellular biosynthetic process;cellular component assembly;cellular component organization;cellular component organization or biogenesis;cellular macromolecule biosynthetic process;cellular macromolecule metabolic process;cellular metabolic process;cellular nitrogen compound metabolic process;cellular process;cellular r…	acetyltransferase activity;catalytic activity;histone acetyltransferase activity;lysine N-acetyltransferase activity;N-acetyltransferase activity;N-acyltransferase activity;protein binding transcription factor activity;receptor activity;RNA polymerase II transcription cofactor activity;RNA polymerase II transcription factor binding transcription factor activity;transcription coactivator activity;…	cell part;intracellular organelle part;intracellular part;macromolecular complex;mediator complex;nuclear part;nucleoplasm part;organelle part;protein complex						0	1	NaN	-4.34294e-08	1	0	0	1	NaN
30.6089	30.4948	29.7705	30.0029	29.6481	29.8158	29.6844	29.7802	29.3267	29.0629	29.2672	28.8461	29.4043	29.332	30.0479	30.3438	29.1847	29.011	28.5432	28.9101	30.0423	29.798	29.3293	29.011	0.372108	0.497914	0.55717	25	24	57.6	0	77.579	289	cellular component organization;cellular component organization or biogenesis;cellular localization;cellular macromolecule localization;cellular membrane organization;cellular process;cellular protein localization;localization;macromolecule localization;membrane organization;nuclear membrane organization;protein localization;protein localization to nucleus;protein localization to organelle		cell part;envelope;integral to membrane;intracellular organelle part;intracellular part;intrinsic to membrane;membrane;membrane part;nuclear envelope;nuclear inner membrane;nuclear membrane;nuclear part;organelle envelope;organelle inner membrane;organelle membrane;organelle part		+			CTX_WT	2.13193	0.027307	0.837419	0.508523	0.62503	0.315597	1.48923	0.0645887	-0.521822
NaN	NaN	NaN	NaN	NaN	NaN	NaN	NaN	NaN	NaN	NaN	NaN	NaN	NaN	NaN	NaN	NaN	NaN	NaN	NaN	NaN	NaN	NaN	NaN	NaN	NaN	NaN	3	3	8.1	0.00016385	0.94724	12			cell part;cytoplasmic membrane-bounded vesicle;cytoplasmic part;cytoplasmic vesicle;intracellular membrane-bounded organelle;intracellular organelle;intracellular part;membrane-bounded organelle;membrane-bounded vesicle;mitochondrion;organelle;vesicle						-4.34294e-08	1	0	-4.34294e-08	1	0	-4.34294e-08	1	0
NaN	NaN	NaN	24.4069	24.3974	24.3971	NaN	NaN	NaN	NaN	NaN	NaN	NaN	NaN	NaN	NaN	NaN	NaN	NaN	NaN	NaN	24.3974	NaN	NaN	0.00554522	NaN	NaN	9	8	9.1	0	6.2889	13	biological regulation;cellular process;cellular response to stimulus;intracellular signal transduction;regulation of biological process;regulation of cellular process;response to stimulus;signal transduction;small GTPase mediated signal transduction	binding;enzyme activator activity;enzyme regulator activity;GTPase activator activity;GTPase regulator activity;nucleoside-triphosphatase regulator activity;protein binding;protein domain specific binding;SH3 domain binding	adherens junction;anchoring junction;cell junction;cell part;cell projection;cell-substrate adherens junction;cell-substrate junction;focal adhesion;intracellular;lamellipodium						0	1	NaN	-4.34294e-08	1	0	0	1	NaN
25.3195	NaN	NaN	25.6126	26.6308	26.2899	26.8383	26.6305	25.247	NaN	NaN	NaN	26.1573	25.7105	NaN	NaN	NaN	NaN	NaN	NaN	NaN	26.4602	25.7105	NaN	0.617143	0.455175	NaN	7	7	13.5	0	8.4966	22		catalytic activity;transferase activity;transferase activity, transferring glycosyl groups	cell part;integral to membrane;intrinsic to membrane;membrane part						0	1	NaN	0	1	NaN	0.609214	0.263922	-0.51534
24.6758	25.5065	NaN	NaN	NaN	NaN	NaN	NaN	NaN	NaN	NaN	NaN	NaN	NaN	NaN	NaN	NaN	NaN	NaN	NaN	NaN	25.0912	NaN	NaN	0.587337	NaN	NaN	6	6	8.1	0	4.2722	8	acute inflammatory response;acute-phase response;amine metabolic process;aminoglycan metabolic process;carbohydrate metabolic process;defense response;glycosaminoglycan metabolic process;hyaluronan metabolic process;inflammatory response;macromolecule metabolic process;metabolic process;nitrogen compound metabolic process;polysaccharide metabolic process;primary metabolic process;response to stim…	endopeptidase inhibitor activity;endopeptidase regulator activity;enzyme inhibitor activity;enzyme regulator activity;peptidase inhibitor activity;peptidase regulator activity;serine-type endopeptidase inhibitor activity	cell part;cytoplasm;extracellular region;intracellular part;membrane;plasma membrane						0	1	NaN	-4.34294e-08	1	0	0	1	NaN
NaN	23.1432	NaN	NaN	NaN	NaN	NaN	NaN	NaN	NaN	NaN	NaN	NaN	NaN	NaN	NaN	NaN	NaN	NaN	NaN	NaN	23.1432	NaN	NaN	NaN	NaN	NaN	41	1	82.5	0.0039894	0.46823	1	alcohol catabolic process;alcohol metabolic process;carbohydrate catabolic process;carbohydrate metabolic process;catabolic process;cellular carbohydrate catabolic process;cellular carbohydrate metabolic process;cellular metabolic process;cellular process;generation of precursor metabolites and energy;glucose catabolic process;glucose metabolic process;glycolysis;hexose catabolic process;hexose m…	aldehyde-lyase activity;carbon-carbon lyase activity;catalytic activity;fructose-bisphosphate aldolase activity;lyase activity		Carbon fixation in photosynthetic organisms;Fructose and mannose metabolism;Glycolysis / Gluconeogenesis;Pentose phosphate pathway					0	1	NaN	-4.34294e-08	1	0	0	1	NaN
NaN	NaN	NaN	NaN	NaN	NaN	NaN	NaN	NaN	NaN	NaN	NaN	NaN	NaN	NaN	NaN	NaN	NaN	NaN	NaN	NaN	NaN	NaN	NaN	NaN	NaN	NaN	1	1	1.6	0.00048208	0.85192	1	biological regulation;cation homeostasis;chemical homeostasis;homeostatic process;ion homeostasis;monovalent inorganic cation homeostasis;regulation of biological quality;regulation of pH	active transmembrane transporter activity;anion transmembrane transporter activity;anion:anion antiporter activity;anion:cation symporter activity;antiporter activity;bicarbonate transmembrane transporter activity;cation transmembrane transporter activity;inorganic anion exchanger activity;inorganic anion transmembrane transporter activity;inorganic cation transmembrane transporter activity;ion t…	basolateral plasma membrane;cell part;integral to membrane;integral to plasma membrane;intrinsic to membrane;intrinsic to plasma membrane;membrane part;plasma membrane part	Bile secretion;Pancreatic secretion;Proximal tubule bicarbonate reclamation					-4.34294e-08	1	0	-4.34294e-08	1	0	-4.34294e-08	1	0
27.6801	27.3657	27.6266	26.5233	26.8709	27.094	27.0386	26.9866	27.2286	27.8275	27.3253	27.473	27.7111	27.2176	28.4531	27.9617	28.0603	28.0073	28.6846	27.6162	27.8946	27.0663	27.592	28.0073	0.390526	0.427395	0.392725	11	11	35.2	0	5.7212	55	metabolic process;nitrate metabolic process;nitrogen compound metabolic process	binding;catalytic activity;cation binding;coenzyme binding;cofactor binding;ion binding;metal ion binding;molybdenum ion binding;molybdopterin cofactor binding;nitrate reductase activity;oxidoreductase activity;oxidoreductase activity, acting on other nitrogenous compounds as donors;pyridoxal phosphate binding;transition metal ion binding;vitamin B6 binding;vitamin binding	cell part;cytoplasmic part;integral to membrane;intracellular membrane-bounded organelle;intracellular organelle;intracellular organelle part;intracellular part;intrinsic to membrane;membrane;membrane part;membrane-bounded organelle;microbody;mitochondrial inner membrane;mitochondrial membrane;mitochondrial outer membrane;mitochondrial part;organelle;organelle inner membrane;organelle membrane;or…		+			CTX_WT	2.72063	0.0105125	-0.904398	0.932812	0.308583	-0.402889	1.55226	0.062361	0.501509
24.2084	23.7812	23.1459	24.3316	24.4823	25.7073	26.1489	26.5705	NaN	NaN	NaN	24.3432	24.3898	24.3647	NaN	25.7105	NaN	NaN	NaN	NaN	NaN	24.4069	24.3773	NaN	1.20841	0.672582	NaN	6	6	19	0	2.5837	16	B cell activation;B cell activation involved in immune response;B cell differentiation;biological regulation;cell activation;cell activation involved in immune response;cell differentiation;cellular developmental process;cellular process;developmental process;immune effector process;immune system process;leukocyte activation;leukocyte activation involved in immune response;leukocyte differentiati…	binding;carbohydrate binding	cell part;cytoplasm;intracellular part						0	1	NaN	0	1	NaN	0.0514349	0.995722	-0.0949309
25.0739	26.7074	25.4989	NaN	NaN	NaN	23.9823	25.8663	NaN	NaN	NaN	NaN	NaN	NaN	NaN	27.82	NaN	NaN	NaN	28.2247	27.4694	25.4989	27.82	27.8471	1.00615	NaN	0.534085	4	4	8.5	0	3.4427	13		adenyl nucleotide binding;adenyl ribonucleotide binding;ATP binding;binding;catalytic activity;kinase activity;nucleotide binding;phosphotransferase activity, alcohol group as acceptor;protein kinase activity;protein serine/threonine kinase activity;purine nucleotide binding;purine ribonucleoside triphosphate binding;purine ribonucleotide binding;ribonucleotide binding;transferase activity;transf…		Ribosome biogenesis in eukaryotes	+			CTX_WT	1.57504	0.0289228	-2.42131	0	0.733129	-0.0270557	0	0.70659	2.39425
NaN	NaN	NaN	24.8086	24.2635	NaN	24.9654	24.9755	NaN	NaN	NaN	NaN	NaN	NaN	NaN	NaN	NaN	NaN	NaN	NaN	NaN	24.887	NaN	NaN	0.335338	NaN	NaN	4	4	6.3	0	1.4152	9	cellular macromolecule metabolic process;cellular metabolic process;cellular nitrogen compound metabolic process;cellular process;macromolecule metabolic process;metabolic process;ncRNA metabolic process;ncRNA processing;nitrogen compound metabolic process;nucleic acid metabolic process;nucleobase-containing compound metabolic process;primary metabolic process;RNA metabolic process;RNA processing…	catalytic activity;hydrolase activity	cell part;cytoplasm;integrator complex;intracellular organelle part;intracellular part;macromolecular complex;nuclear part;nucleoplasm part;organelle part;protein complex						0	1	NaN	-4.34294e-08	1	0	0	1	NaN
[truncated: 6,516 more rows]
[truncated: 4 more columns]
